# Supplementary material
Source: publisher figshare collection journal article supplement (https://acs.figshare.com/ndownloader/files/6133344)
Supplement: Supplementary file 1 [file 6133344]

# 1. Submission Details

_publ_contact_author_name   'Prof. Yohsuke Yamamoto'
_publ_contact_author_address 
;
Department of Chemistry, Graduate School of Science
Hiroshima University
1-3-1 Kagamiyama
Higashi-Hiroshima, 739-8526, JAPAN
;
_publ_contact_author_email         'yyama@sci.hiroshima-u.ac.jp'
_publ_contact_author_fax           '+81-82-424-0723'
_publ_contact_author_phone         

_publ_requested_journal            ‘Inorganic Chemistry’
_publ_requested_category           ?
_publ_requested_coeditor_name      ?

_publ_contact_letter
; ?
;

_publ_section_title
;
Synthesis of a Sterically Demanding Dispiro-piperidine and its Application in Monoamido-dialkyl Zincate Complexes
;

_publ_section_abstract
;
New sterically hindered piperidine analogs were synthesised in short steps. 
The N-lithiated amide was also obtained from this analogue which had large 
steric hindrance. The structures of these metal amides were confirmed by 
single crystal X-ray diffraction analysis and NMR spectroscopy. The zincate 
complexes [Li(\m-NR2)(\m-R')Zn(R')] (R'= Et, tBu) containing this amido ligand 
showed moderately improved regioselectivity for the 6-position in deprotontion 
reactions of tert-butyl 3-bromobenzoate in comparison to those containing TMP.
;

loop_
_publ_author_name
_publ_author_address
      'Morisako, Shogo'
;     Department of Chemistry, Graduate School of Science, Hiroshima University, 1-3-1 Kagamiyama, Higashi-Hiroshima, 739-8526, JAPAN
;
      'Shang, Rong'
;     Department of Chemistry, Graduate School of Science, Hiroshima University, 1-3-1 Kagamiyama, Higashi-Hiroshima, 739-8526, JAPAN
;
      'Yamamoto, Yohsuke'
;     Department of Chemistry, Graduate School of Science, Hiroshima University, 1-3-1 Kagamiyama, Higashi-Hiroshima, 739-8526, JAPAN
;
 

################################################################################
################################################################################
################################################################################

data_2
 
_audit_creation_method            'SHELXL-2014/7'
_shelx_SHELXL_version_number      '2014/7'
_chemical_name_systematic         ?
_chemical_name_common             ?
_chemical_melting_point           ?
_chemical_formula_moiety          ?
_chemical_formula_sum
 'C15 H27 N' 
_chemical_formula_weight          221.37

loop_
 _atom_type_symbol
 _atom_type_description
 _atom_type_scat_dispersion_real
 _atom_type_scat_dispersion_imag
 _atom_type_scat_source
 'C'  'C'   0.0033   0.0016
 'International Tables Vol C Tables 4.2.6.8 and 6.1.1.4'
 'H'  'H'   0.0000   0.0000
 'International Tables Vol C Tables 4.2.6.8 and 6.1.1.4'
 'N'  'N'   0.0061   0.0033
 'International Tables Vol C Tables 4.2.6.8 and 6.1.1.4'
 
_space_group_crystal_system       orthorhombic
_space_group_IT_number            19
_space_group_name_H-M_alt         'P 21 21 21'
_space_group_name_Hall            'P 2ac 2ab'
 
_shelx_space_group_comment
;
The symmetry employed for this shelxl refinement is uniquely defined
by the following loop, which should always be used as a source of
symmetry information in preference to the above space-group names.
They are only intended as comments.
;
 
loop_
 _space_group_symop_operation_xyz
 'x, y, z'
 '-x+1/2, -y, z+1/2'
 '-x, y+1/2, -z+1/2'
 'x+1/2, -y+1/2, -z'
 
_cell_length_a                    6.0545(7)
_cell_length_b                    11.8787(15)
_cell_length_c                    18.202(2)
_cell_angle_alpha                 90
_cell_angle_beta                  90
_cell_angle_gamma                 90
_cell_volume                      1309.1(3)
_cell_formula_units_Z             4
_cell_measurement_temperature     173(2)
_cell_measurement_reflns_used      4368
_cell_measurement_theta_min        2.24
_cell_measurement_theta_max       27.90
 
_exptl_crystal_description        block
_exptl_crystal_colour             colorless
_exptl_crystal_density_meas       ?
_exptl_crystal_density_method     ?
_exptl_crystal_density_diffrn     1.123          
_exptl_crystal_F_000              496
_exptl_transmission_factor_min    ?
_exptl_transmission_factor_max    ?
_exptl_crystal_size_max           0.110
_exptl_crystal_size_mid           0.100
_exptl_crystal_size_min           0.100
_exptl_absorpt_coefficient_mu     0.064
_shelx_estimated_absorpt_T_min    0.993
_shelx_estimated_absorpt_T_max    0.994
_exptl_absorpt_correction_type    multi-scan
_exptl_absorpt_correction_T_min   0.918
_exptl_absorpt_correction_T_max   0.994
_exptl_absorpt_process_details         
;
 SADABS (Sheldrick, 2014)
;

_exptl_special_details
;
 ?
;

_diffrn_ambient_temperature       173(2)
_diffrn_radiation_wavelength      0.71073
_diffrn_radiation_type            MoK\a
_diffrn_radiation_source          'Bruker TXS fine-focus rotating anode'
_diffrn_radiation_monochromator   'Bruker Helios multilayered confocal mirror'
_diffrn_measurement_device_type   'Bruker APEX-II CCD'
_diffrn_measurement_method        '\f and \w scans'
_diffrn_detector_area_resol_mean  ?
_diffrn_reflns_number             7952
_diffrn_reflns_av_unetI/netI      0.0211
_diffrn_reflns_av_R_equivalents   0.0179
_diffrn_reflns_limit_h_min        -7
_diffrn_reflns_limit_h_max        7
_diffrn_reflns_limit_k_min        -13
_diffrn_reflns_limit_k_max        15
_diffrn_reflns_limit_l_min        -23
_diffrn_reflns_limit_l_max        22
_diffrn_reflns_theta_min          2.047
_diffrn_reflns_theta_max          27.925
_diffrn_reflns_theta_full         25.242
_diffrn_measured_fraction_theta_max   0.992
_diffrn_measured_fraction_theta_full  0.998
_diffrn_reflns_Laue_measured_fraction_max    0.992
_diffrn_reflns_Laue_measured_fraction_full   0.998
_diffrn_reflns_point_group_measured_fraction_max   0.980
_diffrn_reflns_point_group_measured_fraction_full  0.995
_reflns_number_total              3067
_reflns_number_gt                 2921
_reflns_threshold_expression      'I > 2\s(I)'
_reflns_Friedel_coverage          0.697
_reflns_Friedel_fraction_max      0.963
_reflns_Friedel_fraction_full     0.992
 
_reflns_special_details
;
 Reflections were merged by SHELXL according to the crystal
 class for the calculation of statistics and refinement.
 
 _reflns_Friedel_fraction is defined as the number of unique
 Friedel pairs measured divided by the number that would be
 possible theoretically, ignoring centric projections and
 systematic absences.
;
 
_computing_data_collection        'Bruker APEX2'
_computing_cell_refinement        'Bruker SAINT'
_computing_data_reduction         'Bruker SAINT'
_computing_structure_solution     ?
_computing_structure_refinement 'SHELXL-2014/7 (Sheldrick, 2014)'
_computing_molecular_graphics     ?
_computing_publication_material   ?
_refine_special_details           ?
_refine_ls_structure_factor_coef  Fsqd
_refine_ls_matrix_type            full
_refine_ls_weighting_scheme       calc
_refine_ls_weighting_details
'w=1/[\s^2^(Fo^2^)+(0.0584P)^2^+0.1853P] where P=(Fo^2^+2Fc^2^)/3'
_atom_sites_solution_primary      ?
_atom_sites_solution_secondary    ?
_atom_sites_solution_hydrogens    mixed
_refine_ls_hydrogen_treatment     mixed
_refine_ls_extinction_method      none
_refine_ls_extinction_coef        .
_refine_ls_abs_structure_details
;
 Flack x determined using 1150 quotients [(I+)-(I-)]/[(I+)+(I-)]
 (Parsons, Flack and Wagner, Acta Cryst. B69 (2013) 249-259).
;
_refine_ls_abs_structure_Flack    0.5(9)
_chemical_absolute_configuration  ?
_refine_ls_number_reflns          3067
_refine_ls_number_parameters      149
_refine_ls_number_restraints      0
_refine_ls_R_factor_all           0.0381
_refine_ls_R_factor_gt            0.0358
_refine_ls_wR_factor_ref          0.0968
_refine_ls_wR_factor_gt           0.0946
_refine_ls_goodness_of_fit_ref    1.043
_refine_ls_restrained_S_all       1.043
_refine_ls_shift/su_max           0.000
_refine_ls_shift/su_mean          0.000
 
loop_
 _atom_site_label
 _atom_site_type_symbol
 _atom_site_fract_x
 _atom_site_fract_y
 _atom_site_fract_z
 _atom_site_U_iso_or_equiv
 _atom_site_adp_type
 _atom_site_occupancy
 _atom_site_site_symmetry_order  
 _atom_site_calc_flag
 _atom_site_refinement_flags_posn
 _atom_site_refinement_flags_adp
 _atom_site_refinement_flags_occupancy
 _atom_site_disorder_assembly
 _atom_site_disorder_group
N1 N 0.5278(2) 0.55290(12) 0.23669(7) 0.0196(3) Uani 1 1 d . . . . .
H1 H 0.467(6) 0.609(3) 0.2327(18) 0.100(13) Uiso 1 1 d . . . . .
C1 C 0.6223(2) 0.54163(12) 0.31139(8) 0.0171(3) Uani 1 1 d . . . . .
C2 C 0.7105(3) 0.42144(13) 0.32291(9) 0.0250(3) Uani 1 1 d . . . . .
H2A H 0.7998 0.4196 0.3685 0.030 Uiso 1 1 calc R U . . .
H2B H 0.5840 0.3697 0.3297 0.030 Uiso 1 1 calc R U . . .
C4 C 0.7204(3) 0.38694(14) 0.18794(9) 0.0287(4) Uani 1 1 d . . . . .
H4A H 0.5902 0.3368 0.1912 0.034 Uiso 1 1 calc R U . . .
H4B H 0.8138 0.3601 0.1469 0.034 Uiso 1 1 calc R U . . .
C3 C 0.8514(3) 0.37941(15) 0.25928(9) 0.0295(4) Uani 1 1 d . . . . .
H3A H 0.8958 0.3004 0.2683 0.035 Uiso 1 1 calc R U . . .
H3B H 0.9870 0.4256 0.2554 0.035 Uiso 1 1 calc R U . . .
C5 C 0.6424(3) 0.50731(13) 0.17146(8) 0.0199(3) Uani 1 1 d . . . . .
C6 C 0.8029(2) 0.63079(13) 0.32615(8) 0.0199(3) Uani 1 1 d . . . . .
H6A H 0.9368 0.6105 0.2979 0.024 Uiso 1 1 calc R U . . .
H6B H 0.7506 0.7046 0.3079 0.024 Uiso 1 1 calc R U . . .
C7 C 0.8653(3) 0.64259(15) 0.40749(9) 0.0261(3) Uani 1 1 d . . . . .
H7A H 0.9377 0.5725 0.4243 0.031 Uiso 1 1 calc R U . . .
H7B H 0.9723 0.7050 0.4132 0.031 Uiso 1 1 calc R U . . .
C8 C 0.6633(3) 0.66566(15) 0.45520(9) 0.0274(4) Uani 1 1 d . . . . .
H8A H 0.7080 0.6686 0.5075 0.033 Uiso 1 1 calc R U . . .
H8B H 0.5992 0.7396 0.4419 0.033 Uiso 1 1 calc R U . . .
C9 C 0.4912(3) 0.57405(14) 0.44456(9) 0.0265(3) Uani 1 1 d . . . . .
H9A H 0.3585 0.5919 0.4741 0.032 Uiso 1 1 calc R U . . .
H9B H 0.5511 0.5012 0.4619 0.032 Uiso 1 1 calc R U . . .
C10 C 0.4267(2) 0.56412(14) 0.36347(8) 0.0220(3) Uani 1 1 d . . . . .
H10A H 0.3530 0.6347 0.3482 0.026 Uiso 1 1 calc R U . . .
H10B H 0.3183 0.5023 0.3581 0.026 Uiso 1 1 calc R U . . .
C11 C 0.4707(3) 0.50403(14) 0.10874(8) 0.0243(3) Uani 1 1 d . . . . .
H11A H 0.5342 0.4625 0.0666 0.029 Uiso 1 1 calc R U . . .
H11B H 0.3390 0.4620 0.1258 0.029 Uiso 1 1 calc R U . . .
C12 C 0.3984(3) 0.62079(14) 0.08273(9) 0.0253(3) Uani 1 1 d . . . . .
H12A H 0.2949 0.6128 0.0410 0.030 Uiso 1 1 calc R U . . .
H12B H 0.3195 0.6597 0.1230 0.030 Uiso 1 1 calc R U . . .
C13 C 0.5958(3) 0.69164(15) 0.05894(9) 0.0270(4) Uani 1 1 d . . . . .
H13A H 0.5454 0.7686 0.0466 0.032 Uiso 1 1 calc R U . . .
H13B H 0.6627 0.6583 0.0143 0.032 Uiso 1 1 calc R U . . .
C14 C 0.7692(3) 0.69780(14) 0.11981(9) 0.0249(3) Uani 1 1 d . . . . .
H14A H 0.7082 0.7398 0.1622 0.030 Uiso 1 1 calc R U . . .
H14B H 0.9004 0.7390 0.1017 0.030 Uiso 1 1 calc R U . . .
C15 C 0.8380(2) 0.57994(14) 0.14460(8) 0.0221(3) Uani 1 1 d . . . . .
H15A H 0.9471 0.5869 0.1848 0.027 Uiso 1 1 calc R U . . .
H15B H 0.9111 0.5411 0.1031 0.027 Uiso 1 1 calc R U . . .
 
loop_
 _atom_site_aniso_label
 _atom_site_aniso_U_11
 _atom_site_aniso_U_22
 _atom_site_aniso_U_33
 _atom_site_aniso_U_23
 _atom_site_aniso_U_13
 _atom_site_aniso_U_12
N1 0.0187(6) 0.0233(6) 0.0169(6) -0.0005(5) 0.0002(5) 0.0035(5)
C1 0.0168(6) 0.0184(6) 0.0161(6) 0.0011(5) 0.0007(5) 0.0007(5)
C2 0.0318(8) 0.0196(7) 0.0237(8) 0.0042(6) -0.0007(7) 0.0045(6)
C4 0.0381(9) 0.0216(7) 0.0265(8) -0.0059(6) -0.0034(7) 0.0076(7)
C3 0.0381(10) 0.0232(7) 0.0274(8) -0.0011(6) -0.0028(7) 0.0132(7)
C5 0.0205(7) 0.0211(7) 0.0180(7) -0.0030(6) -0.0015(6) 0.0017(6)
C6 0.0183(7) 0.0243(7) 0.0173(7) -0.0011(6) 0.0004(5) -0.0025(6)
C7 0.0227(8) 0.0354(8) 0.0201(7) -0.0035(6) -0.0016(6) -0.0031(7)
C8 0.0310(9) 0.0334(8) 0.0178(7) -0.0038(6) 0.0000(6) 0.0055(7)
C9 0.0248(8) 0.0347(8) 0.0200(7) 0.0041(6) 0.0056(6) 0.0042(7)
C10 0.0169(7) 0.0284(8) 0.0206(7) 0.0021(6) 0.0037(6) -0.0001(6)
C11 0.0243(8) 0.0267(8) 0.0220(7) -0.0037(6) -0.0046(6) -0.0019(6)
C12 0.0207(8) 0.0323(8) 0.0228(7) 0.0003(6) -0.0049(6) 0.0012(7)
C13 0.0267(8) 0.0329(8) 0.0213(7) 0.0052(7) -0.0004(6) 0.0014(7)
C14 0.0210(8) 0.0305(8) 0.0231(7) 0.0034(6) 0.0011(6) -0.0046(6)
C15 0.0173(7) 0.0322(8) 0.0167(7) -0.0021(6) 0.0019(5) 0.0026(6)
 
_geom_special_details
;
 All esds (except the esd in the dihedral angle between two l.s. planes)
 are estimated using the full covariance matrix.  The cell esds are taken
 into account individually in the estimation of esds in distances, angles
 and torsion angles; correlations between esds in cell parameters are only
 used when they are defined by crystal symmetry.  An approximate (isotropic)
 treatment of cell esds is used for estimating esds involving l.s. planes.
;
 
loop_
 _geom_bond_atom_site_label_1
 _geom_bond_atom_site_label_2
 _geom_bond_distance
 _geom_bond_site_symmetry_2
 _geom_bond_publ_flag
N1 C5 1.4779(19) . ?
N1 C1 1.4813(19) . ?
N1 H1 0.77(4) . ?
C1 C2 1.539(2) . ?
C1 C10 1.540(2) . ?
C1 C6 1.546(2) . ?
C2 C3 1.523(2) . ?
C2 H2A 0.9900 . ?
C2 H2B 0.9900 . ?
C4 C3 1.524(2) . ?
C4 C5 1.536(2) . ?
C4 H4A 0.9900 . ?
C4 H4B 0.9900 . ?
C3 H3A 0.9900 . ?
C3 H3B 0.9900 . ?
C5 C15 1.544(2) . ?
C5 C11 1.545(2) . ?
C6 C7 1.534(2) . ?
C6 H6A 0.9900 . ?
C6 H6B 0.9900 . ?
C7 C8 1.525(2) . ?
C7 H7A 0.9900 . ?
C7 H7B 0.9900 . ?
C8 C9 1.519(2) . ?
C8 H8A 0.9900 . ?
C8 H8B 0.9900 . ?
C9 C10 1.531(2) . ?
C9 H9A 0.9900 . ?
C9 H9B 0.9900 . ?
C10 H10A 0.9900 . ?
C10 H10B 0.9900 . ?
C11 C12 1.529(2) . ?
C11 H11A 0.9900 . ?
C11 H11B 0.9900 . ?
C12 C13 1.524(2) . ?
C12 H12A 0.9900 . ?
C12 H12B 0.9900 . ?
C13 C14 1.528(2) . ?
C13 H13A 0.9900 . ?
C13 H13B 0.9900 . ?
C14 C15 1.529(2) . ?
C14 H14A 0.9900 . ?
C14 H14B 0.9900 . ?
C15 H15A 0.9900 . ?
C15 H15B 0.9900 . ?
 
loop_
 _geom_angle_atom_site_label_1
 _geom_angle_atom_site_label_2
 _geom_angle_atom_site_label_3
 _geom_angle
 _geom_angle_site_symmetry_1
 _geom_angle_site_symmetry_3
 _geom_angle_publ_flag
C5 N1 C1 121.54(12) . . ?
C5 N1 H1 118(3) . . ?
C1 N1 H1 111(2) . . ?
N1 C1 C2 110.06(12) . . ?
N1 C1 C10 104.62(12) . . ?
C2 C1 C10 110.13(12) . . ?
N1 C1 C6 111.76(12) . . ?
C2 C1 C6 111.49(13) . . ?
C10 C1 C6 108.55(12) . . ?
C3 C2 C1 113.27(13) . . ?
C3 C2 H2A 108.9 . . ?
C1 C2 H2A 108.9 . . ?
C3 C2 H2B 108.9 . . ?
C1 C2 H2B 108.9 . . ?
H2A C2 H2B 107.7 . . ?
C3 C4 C5 112.41(13) . . ?
C3 C4 H4A 109.1 . . ?
C5 C4 H4A 109.1 . . ?
C3 C4 H4B 109.1 . . ?
C5 C4 H4B 109.1 . . ?
H4A C4 H4B 107.9 . . ?
C2 C3 C4 109.72(15) . . ?
C2 C3 H3A 109.7 . . ?
C4 C3 H3A 109.7 . . ?
C2 C3 H3B 109.7 . . ?
C4 C3 H3B 109.7 . . ?
H3A C3 H3B 108.2 . . ?
N1 C5 C4 109.19(13) . . ?
N1 C5 C15 114.17(12) . . ?
C4 C5 C15 110.25(13) . . ?
N1 C5 C11 106.68(12) . . ?
C4 C5 C11 109.15(12) . . ?
C15 C5 C11 107.23(12) . . ?
C7 C6 C1 113.85(12) . . ?
C7 C6 H6A 108.8 . . ?
C1 C6 H6A 108.8 . . ?
C7 C6 H6B 108.8 . . ?
C1 C6 H6B 108.8 . . ?
H6A C6 H6B 107.7 . . ?
C8 C7 C6 111.63(13) . . ?
C8 C7 H7A 109.3 . . ?
C6 C7 H7A 109.3 . . ?
C8 C7 H7B 109.3 . . ?
C6 C7 H7B 109.3 . . ?
H7A C7 H7B 108.0 . . ?
C9 C8 C7 110.41(13) . . ?
C9 C8 H8A 109.6 . . ?
C7 C8 H8A 109.6 . . ?
C9 C8 H8B 109.6 . . ?
C7 C8 H8B 109.6 . . ?
H8A C8 H8B 108.1 . . ?
C8 C9 C10 110.67(13) . . ?
C8 C9 H9A 109.5 . . ?
C10 C9 H9A 109.5 . . ?
C8 C9 H9B 109.5 . . ?
C10 C9 H9B 109.5 . . ?
H9A C9 H9B 108.1 . . ?
C9 C10 C1 114.24(13) . . ?
C9 C10 H10A 108.7 . . ?
C1 C10 H10A 108.7 . . ?
C9 C10 H10B 108.7 . . ?
C1 C10 H10B 108.7 . . ?
H10A C10 H10B 107.6 . . ?
C12 C11 C5 113.48(13) . . ?
C12 C11 H11A 108.9 . . ?
C5 C11 H11A 108.9 . . ?
C12 C11 H11B 108.9 . . ?
C5 C11 H11B 108.9 . . ?
H11A C11 H11B 107.7 . . ?
C13 C12 C11 111.37(14) . . ?
C13 C12 H12A 109.4 . . ?
C11 C12 H12A 109.4 . . ?
C13 C12 H12B 109.4 . . ?
C11 C12 H12B 109.4 . . ?
H12A C12 H12B 108.0 . . ?
C12 C13 C14 111.05(13) . . ?
C12 C13 H13A 109.4 . . ?
C14 C13 H13A 109.4 . . ?
C12 C13 H13B 109.4 . . ?
C14 C13 H13B 109.4 . . ?
H13A C13 H13B 108.0 . . ?
C13 C14 C15 110.93(13) . . ?
C13 C14 H14A 109.5 . . ?
C15 C14 H14A 109.5 . . ?
C13 C14 H14B 109.5 . . ?
C15 C14 H14B 109.5 . . ?
H14A C14 H14B 108.0 . . ?
C14 C15 C5 113.34(13) . . ?
C14 C15 H15A 108.9 . . ?
C5 C15 H15A 108.9 . . ?
C14 C15 H15B 108.9 . . ?
C5 C15 H15B 108.9 . . ?
H15A C15 H15B 107.7 . . ?
 
loop_
 _geom_torsion_atom_site_label_1
 _geom_torsion_atom_site_label_2
 _geom_torsion_atom_site_label_3
 _geom_torsion_atom_site_label_4
 _geom_torsion
 _geom_torsion_site_symmetry_1
 _geom_torsion_site_symmetry_2
 _geom_torsion_site_symmetry_3
 _geom_torsion_site_symmetry_4
 _geom_torsion_publ_flag
C5 N1 C1 C2 -44.30(18) . . . . ?
C5 N1 C1 C10 -162.58(13) . . . . ?
C5 N1 C1 C6 80.15(16) . . . . ?
N1 C1 C2 C3 47.05(18) . . . . ?
C10 C1 C2 C3 161.89(14) . . . . ?
C6 C1 C2 C3 -77.56(17) . . . . ?
C1 C2 C3 C4 -55.93(19) . . . . ?
C5 C4 C3 C2 58.3(2) . . . . ?
C1 N1 C5 C4 46.48(18) . . . . ?
C1 N1 C5 C15 -77.44(17) . . . . ?
C1 N1 C5 C11 164.30(12) . . . . ?
C3 C4 C5 N1 -51.46(19) . . . . ?
C3 C4 C5 C15 74.73(18) . . . . ?
C3 C4 C5 C11 -167.73(14) . . . . ?
N1 C1 C6 C7 165.58(13) . . . . ?
C2 C1 C6 C7 -70.77(16) . . . . ?
C10 C1 C6 C7 50.70(17) . . . . ?
C1 C6 C7 C8 -54.44(19) . . . . ?
C6 C7 C8 C9 56.10(19) . . . . ?
C7 C8 C9 C10 -56.69(18) . . . . ?
C8 C9 C10 C1 56.61(18) . . . . ?
N1 C1 C10 C9 -171.53(12) . . . . ?
C2 C1 C10 C9 70.22(17) . . . . ?
C6 C1 C10 C9 -52.08(17) . . . . ?
N1 C5 C11 C12 67.79(16) . . . . ?
C4 C5 C11 C12 -174.36(14) . . . . ?
C15 C5 C11 C12 -54.93(17) . . . . ?
C5 C11 C12 C13 56.06(18) . . . . ?
C11 C12 C13 C14 -54.21(18) . . . . ?
C12 C13 C14 C15 54.67(18) . . . . ?
C13 C14 C15 C5 -57.13(17) . . . . ?
N1 C5 C15 C14 -62.37(17) . . . . ?
C4 C5 C15 C14 174.30(13) . . . . ?
C11 C5 C15 C14 55.58(16) . . . . ?
 
_refine_diff_density_max    0.315
_refine_diff_density_min   -0.173
_refine_diff_density_rms    0.037

_shelx_res_file
;

    591_0m_a.res created by SHELXL-2014/7


TITL 591_0m_a.res in P2(1)2(1)2(1)
REM Old TITL 591_0m in P2(1)2(1)2(1)

REM SHELXT solution in P2(1)2(1)2(1)
REM R1 0.122,  Rweak 0.021,  Alpha 0.001,  Orientation as input
REM Flack x =  0.080 ( 0.945 ) from Parsons' quotients
REM Formula found by SHELXT:  C15 N

CELL  0.71073   6.0545  11.8787  18.2022   90.000   90.000   90.000
ZERR    4.000   0.0007   0.0015   0.0022    0.000    0.000    0.000
LATT -1
SYMM 1/2-X, -Y, 1/2+Z
SYMM -X, 1/2+Y, 1/2-Z
SYMM 1/2+X, 1/2-Y, -Z
REM  SPGR P2(1)2(1)2(1) orthorhombic
SFAC C H N
UNIT 60 108 4
TEMP -100.000
SIZE 0.11 0.10 0.10
L.S. 100
BOND $H
LIST 6
FMAP 2
PLAN -50
CONF
ACTA
WPDB
MERG 2

WGHT    0.058400    0.185300
FVAR       0.90159
N1    3    0.527815    0.552904    0.236686    11.00000    0.01865    0.02327 =
         0.01685   -0.00053    0.00024    0.00354
H1    2    0.466654    0.609423    0.232698    11.00000    0.10022
C1    1    0.622289    0.541628    0.311394    11.00000    0.01683    0.01839 =
         0.01614    0.00114    0.00071    0.00071
C2    1    0.710528    0.421439    0.322910    11.00000    0.03183    0.01956 =
         0.02369    0.00423   -0.00070    0.00449
AFIX  23
H2A   2    0.799757    0.419583    0.368471    11.00000   -1.20000
H2B   2    0.583965    0.369691    0.329652    11.00000   -1.20000
AFIX   0
C4    1    0.720423    0.386939    0.187945    11.00000    0.03814    0.02164 =
         0.02646   -0.00593   -0.00336    0.00764
AFIX  23
H4A   2    0.590242    0.336758    0.191225    11.00000   -1.20000
H4B   2    0.813795    0.360139    0.146863    11.00000   -1.20000
AFIX   0
C3    1    0.851399    0.379405    0.259279    11.00000    0.03809    0.02317 =
         0.02738   -0.00111   -0.00276    0.01321
AFIX  23
H3A   2    0.895790    0.300381    0.268253    11.00000   -1.20000
H3B   2    0.986981    0.425604    0.255360    11.00000   -1.20000
AFIX   0
C5    1    0.642390    0.507315    0.171458    11.00000    0.02052    0.02109 =
         0.01799   -0.00303   -0.00152    0.00173
C6    1    0.802940    0.630793    0.326155    11.00000    0.01826    0.02428 =
         0.01726   -0.00114    0.00037   -0.00253
AFIX  23
H6A   2    0.936848    0.610475    0.297898    11.00000   -1.20000
H6B   2    0.750609    0.704619    0.307880    11.00000   -1.20000
AFIX   0
C7    1    0.865303    0.642595    0.407488    11.00000    0.02271    0.03540 =
         0.02012   -0.00353   -0.00164   -0.00312
AFIX  23
H7A   2    0.937742    0.572460    0.424301    11.00000   -1.20000
H7B   2    0.972265    0.705026    0.413180    11.00000   -1.20000
AFIX   0
C8    1    0.663324    0.665659    0.455202    11.00000    0.03100    0.03343 =
         0.01783   -0.00381    0.00002    0.00552
AFIX  23
H8A   2    0.707963    0.668572    0.507491    11.00000   -1.20000
H8B   2    0.599164    0.739566    0.441921    11.00000   -1.20000
AFIX   0
C9    1    0.491214    0.574050    0.444557    11.00000    0.02484    0.03470 =
         0.02003    0.00405    0.00562    0.00422
AFIX  23
H9A   2    0.358546    0.591870    0.474147    11.00000   -1.20000
H9B   2    0.551117    0.501215    0.461930    11.00000   -1.20000
AFIX   0
C10   1    0.426728    0.564124    0.363467    11.00000    0.01690    0.02839 =
         0.02064    0.00212    0.00374   -0.00010
AFIX  23
H10A  2    0.353032    0.634738    0.348182    11.00000   -1.20000
H10B  2    0.318340    0.502258    0.358141    11.00000   -1.20000
AFIX   0
C11   1    0.470667    0.504029    0.108741    11.00000    0.02431    0.02671 =
         0.02197   -0.00369   -0.00461   -0.00194
AFIX  23
H11A  2    0.534244    0.462473    0.066604    11.00000   -1.20000
H11B  2    0.339006    0.462044    0.125758    11.00000   -1.20000
AFIX   0
C12   1    0.398437    0.620795    0.082725    11.00000    0.02066    0.03232 =
         0.02284    0.00026   -0.00487    0.00122
AFIX  23
H12A  2    0.294916    0.612763    0.040952    11.00000   -1.20000
H12B  2    0.319527    0.659665    0.123046    11.00000   -1.20000
AFIX   0
C13   1    0.595829    0.691637    0.058941    11.00000    0.02669    0.03293 =
         0.02129    0.00524   -0.00038    0.00137
AFIX  23
H13A  2    0.545386    0.768613    0.046567    11.00000   -1.20000
H13B  2    0.662737    0.658267    0.014347    11.00000   -1.20000
AFIX   0
C14   1    0.769190    0.697803    0.119807    11.00000    0.02104    0.03053 =
         0.02312    0.00345    0.00115   -0.00459
AFIX  23
H14A  2    0.708235    0.739801    0.162185    11.00000   -1.20000
H14B  2    0.900399    0.739038    0.101661    11.00000   -1.20000
AFIX   0
C15   1    0.837959    0.579941    0.144597    11.00000    0.01735    0.03218 =
         0.01673   -0.00214    0.00187    0.00259
AFIX  23
H15A  2    0.947107    0.586877    0.184842    11.00000   -1.20000
H15B  2    0.911138    0.541056    0.103104    11.00000   -1.20000
REM #####
REM #####
AFIX   0
HKLF 4

REM  591_0m_a.res in P2(1)2(1)2(1)
REM R1 =  0.0358 for    2921 Fo > 4sig(Fo)  and  0.0381 for all    3067 data
REM    149 parameters refined using      0 restraints

END

WGHT      0.0581      0.1883

REM Highest difference peak  0.315,  deepest hole -0.173,  1-sigma level  0.037
Q1    1   0.3899  0.5302  0.2398  11.00000  0.05    0.31
Q2    1   0.6599  0.4801  0.3192  11.00000  0.05    0.26
Q3    1   0.7448  0.5453  0.1579  11.00000  0.05    0.23
Q4    1   0.7150  0.5873  0.3183  11.00000  0.05    0.22
Q5    1   0.5195  0.5489  0.3382  11.00000  0.05    0.22
Q6    1   0.5496  0.5066  0.1395  11.00000  0.05    0.19
Q7    1   0.4699  0.5642  0.4011  11.00000  0.05    0.19
Q8    1   0.6706  0.4472  0.1789  11.00000  0.05    0.18
Q9    1   0.8288  0.6383  0.3639  11.00000  0.05    0.18
Q10   1   0.4362  0.5620  0.0989  11.00000  0.05    0.17
Q11   1   0.7548  0.6568  0.4271  11.00000  0.05    0.17
Q12   1   0.5800  0.5459  0.2726  11.00000  0.05    0.17
Q13   1   0.8180  0.6382  0.1259  11.00000  0.05    0.17
Q14   1   0.5978  0.5360  0.2024  11.00000  0.05    0.16
Q15   1   0.7806  0.3848  0.2215  11.00000  0.05    0.15
Q16   1   0.5024  0.6562  0.0754  11.00000  0.05    0.15
Q17   1   0.6736  0.6880  0.0920  11.00000  0.05    0.13
Q18   1   0.7924  0.4003  0.2929  11.00000  0.05    0.12
Q19   1   0.5836  0.6205  0.4490  11.00000  0.05    0.11
Q20   1   0.4065  0.4223  0.1156  11.00000  0.05    0.10
Q21   1   0.5050  0.6240  0.2262  11.00000  0.05    0.09
Q22   1   0.5924  0.7562  0.0235  11.00000  0.05    0.09
Q23   1   0.9838  0.6071  0.4334  11.00000  0.05    0.09
Q24   1   0.3081  0.5390  0.3454  11.00000  0.05    0.09
Q25   1   0.6227  0.3966  0.3198  11.00000  0.05    0.09
Q26   1   0.9701  0.5613  0.1651  11.00000  0.05    0.09
Q27   1   0.2318  0.6256  0.0788  11.00000  0.05    0.09
Q28   1   0.2280  0.4819  0.1922  11.00000  0.05    0.08
Q29   1   0.3179  0.4829  0.3184  11.00000  0.05    0.08
Q30   1   1.0888  0.6432  0.2598  11.00000  0.05    0.08
Q31   1   0.2458  0.4781  0.4796  11.00000  0.05    0.08
Q32   1   0.4556  0.3347  0.1406  11.00000  0.05    0.08
Q33   1   0.2639  0.4247  0.1632  11.00000  0.05    0.08
Q34   1   0.4737  0.3432  0.3539  11.00000  0.05    0.08
Q35   1   0.4365  0.4107  0.4001  11.00000  0.05    0.08
Q36   1   0.6529  0.2850  0.0975  11.00000  0.05    0.08
Q37   1   0.7385  0.7236  0.1446  11.00000  0.05    0.08
Q38   1  -0.0061  0.4428  0.4792  11.00000  0.05    0.08
Q39   1   0.3967  0.6797  0.3512  11.00000  0.05    0.08
Q40   1   0.3999  0.6346  0.3586  11.00000  0.05    0.08
Q41   1   0.2198  0.4069  0.4009  11.00000  0.05    0.07
Q42   1   0.4714  0.3834  0.4537  11.00000  0.05    0.07
Q43   1   0.2549  0.5362  0.4841  11.00000  0.05    0.07
Q44   1   0.1108  0.4374  0.0819  11.00000  0.05    0.07
Q45   1   0.2662  0.3919  0.3367  11.00000  0.05    0.07
Q46   1   0.3518  0.5427  0.4677  11.00000  0.05    0.07
Q47   1   0.2948  0.4312  0.2394  11.00000  0.05    0.07
Q48   1   0.3966  0.6095 -0.0252  11.00000  0.05    0.07
Q49   1   0.1172  0.3575  0.4449  11.00000  0.05    0.07
Q50   1   0.7768  0.3608  0.4152  11.00000  0.05    0.07
;
_shelx_res_checksum   76506

_shelx_hkl_file
;
  -1   0   0    0.00    0.30
  -2   0   0   28.50    1.00
  -3   0   0   -0.30    0.40
  -4   0   0  138.09    3.40
   5   0   0    0.00    0.50
   6   0   0   56.59    2.40
   7   0   0    1.00    0.90
   0   1   0   -9.00    0.20
   1  -1   0 9792.52  203.58
  -1   1   0 9999.00  182.88
   1   1   0 9956.30  197.18
   2   1   0  147.39    3.10
  -2   1   0  153.28    3.10
   3   1   0   46.10    1.50
  -3   1   0   44.10    1.50
   4   1   0   48.80    1.70
  -4   1   0   49.40    1.80
   5   1   0  275.27    6.00
   5  -1   0  277.57    6.10
  -5   1   0  273.97    6.10
   6   1   0   51.79    2.30
   6  -1   0   50.69    2.20
   7   1   0    5.50    1.20
   0   2   0 5800.62  101.29
   1   2   0 2546.55   46.10
   1  -2   0 2579.84   47.10
   1  -2   0 2640.54   44.60
  -1   2   0 2561.54   46.00
   2   2   0 1548.55   26.90
   2  -2   0 1506.75   27.10
  -2   2   0 1573.34   26.90
   3  -2   0  288.87    6.10
   3   2   0  290.37    5.80
  -3   2   0  285.57    5.80
  -4   2   0    4.40    0.80
   4  -2   0    4.80    0.60
   4   2   0    3.80    0.70
  -5   2   0  243.18    5.70
   5  -2   0  250.77    5.40
   5   2   0  244.58    5.50
   6   2   0   87.69    3.10
   6  -2   0   79.29    3.20
   7   2   0   44.20    2.50
   7  -2   0   45.50    2.80
   0   3   0   -0.10    0.40
   1   3   0 3098.19   53.49
  -1   3   0 3023.40   53.49
   1  -3   0 2821.12   53.69
   2  -3   0 1414.66   25.80
  -2   3   0 1460.75   25.60
   2  -3   0 1487.75   25.60
   2   3   0 1463.45   25.60
   3  -3   0  126.29    3.30
   3  -3   0  112.89    2.60
  -3   3   0  122.59    3.00
   3   3   0  119.39    3.00
   4  -3   0   15.40    1.40
   4   3   0   14.80    1.10
   4  -3   0   13.20    0.90
  -4   3   0   14.20    1.10
   5  -3   0   18.70    1.80
   5   3   0   22.30    1.40
  -5   3   0   18.10    1.40
   6  -3   0   37.10    2.20
   6   3   0   33.60    2.00
   7   3   0   21.30    2.00
   7  -3   0   18.90    2.00
   0   4   0 2396.96   43.00
  -1   4   0  864.91   15.50
   1   4   0  883.71   15.60
   1  -4   0  843.52   15.70
   2   4   0 1175.18   20.80
   2  -4   0 1184.48   20.20
   2  -4   0 1150.38   21.00
  -2   4   0 1153.78   20.80
   3   4   0  813.72   14.90
  -3   4   0  814.42   14.90
   3  -4   0  798.02   15.20
   3  -4   0  807.02   14.20
   4   4   0   64.19    2.20
  -4   4   0   61.99    2.20
   4  -4   0   64.89    2.40
   5  -4   0   -0.20    0.70
   5   4   0    0.60    0.60
  -5   4   0    0.20    0.60
   6   4   0    5.50    1.20
   6  -4   0    6.60    1.30
   7   4   0    3.40    1.20
   7  -4   0    7.80    1.60
   1  -5   0    0.40    0.50
  -1   5   0    1.50    0.50
   1   5   0    0.80    0.50
   2   5   0   64.19    2.00
  -2   5   0   62.59    2.00
   2  -5   0   65.19    2.20
   3   5   0  254.27    5.60
   3  -5   0  254.67    5.90
  -3   5   0  257.17    5.60
   4  -5   0    1.00    0.80
   4   5   0    0.60    0.70
  -4   5   0    0.80    0.60
   5   5   0    1.60    0.80
   5  -5   0    0.00    0.70
  -5   5   0    0.50    0.70
   6  -5   0   13.40    1.70
   6   5   0   10.90    1.60
   7   5   0  134.89    4.70
   7  -5   0  147.19    5.20
   1  -6   0  672.53   12.90
   1   6   0  663.13   12.70
  -1   6   0  663.23   12.60
  -1   6   0  698.83   11.70
  -2   6   0   31.00    1.50
   2   6   0   34.40    1.60
   2  -6   0   31.90    1.70
   3   6   0   16.50    1.20
   3  -6   0   11.80    1.30
   4   6   0  129.69    3.60
  -4   6   0  122.89    3.50
   4  -6   0  124.29    3.90
  -5   6   0    2.80    0.90
   5  -6   0    3.00    1.10
   5   6   0    3.30    1.00
   6   6   0    8.80    1.40
   6  -6   0    7.80    1.50
   7   6   0    0.00    1.00
   7  -6   0   -1.00    1.20
   1  -7   0    0.50    0.70
  -1   7   0   -0.50    0.60
   1   7   0   -0.60    0.50
  -1   7   0    0.10    0.20
  -2   7   0  593.74   11.50
   2  -7   0  587.94   11.80
   2   7   0  584.34   11.50
  -3   7   0   23.10    1.40
   3  -7   0   20.10    1.60
   3   7   0   20.60    1.50
   4  -7   0    7.10    1.20
  -4   7   0    7.10    1.10
   4   7   0    7.00    1.10
  -5   7   0  141.09    4.20
   5   7   0  142.59    4.20
   5  -7   0  143.09    4.60
   6   7   0    4.00    1.30
   6  -7   0    5.30    1.40
   7  -7   0    3.30    1.50
   7   7   0    0.90    1.10
   0   8   0    5.70    0.90
   0   8   0    5.70    0.60
   1   8   0   55.49    2.10
  -1   8   0   53.29    2.10
   2   8   0   99.79    3.10
   2  -8   0   96.59    3.30
  -2   8   0   98.59    3.00
   3   8   0   76.49    2.80
  -3   8   0   82.09    2.80
   3  -8   0   77.69    3.00
   4  -8   0  103.09    3.80
  -4   8   0  104.29    3.40
   4   8   0  104.89    3.40
  -5   8   0   29.50    1.90
   5   8   0   29.40    2.00
   5   8   0   31.40    2.00
   5  -8   0   31.00    2.40
   6   8   0   19.00    2.00
   6  -8   0   23.00    2.30
   0   9   0    0.10    0.70
  -1   9   0    7.70    1.10
   1   9   0    9.60    1.20
   2   9   0    8.40    1.20
   2  -9   0    8.50    1.30
  -2   9   0    9.00    1.20
   3  -9   0   68.49    3.00
   3   9   0   66.19    2.70
  -3   9   0   62.99    2.60
  -4   9   0   30.10    1.90
   4   9   0   30.40    2.00
   4  -9   0   32.40    2.30
  -5   9   0    2.00    0.90
   5   9   0    1.70    1.00
   5  -9   0    1.20    1.10
   5   9   0   -0.30    0.90
   6  -9   0    6.20    1.50
   6   9   0    2.70    1.20
   0  10   0   17.20    1.60
  -1  10   0    4.50    1.00
   1  10   0    2.60    0.90
   1  10   0    3.70    0.80
   2  10   0   60.99    2.70
  -2  10   0   57.39    2.50
   3 -10   0   76.69    3.30
   3  10   0   74.69    2.80
   3  10   0   74.99    3.00
  -3  10   0   82.19    3.10
   4 -10   0   12.90    1.70
   4  10   0   14.80    1.70
  -4  10   0   17.60    1.70
   4  10   0   14.00    1.60
   5  10   0   19.80    1.90
   5  10   0   22.60    2.10
   5 -10   0   19.90    2.20
  -5  10   0   22.50    2.00
   6 -10   0    8.10    1.80
   6  10   0    9.80    1.70
   0  11   0    1.30    0.90
  -1  11   0    2.80    1.00
   1  11   0    3.90    1.10
   2  11   0   42.10    1.90
   2  11   0   38.70    2.40
  -2  11   0   42.80    2.30
  -3  11   0    8.30    1.30
   3  11   0    9.90    1.50
   3 -11   0    8.40    1.60
   3  11   0    9.80    1.30
  -4  11   0    3.10    1.10
   4  11   0    4.20    1.20
   4  11   0    1.90    1.10
   4 -11   0    2.90    1.30
   5 -11   0    2.70    1.40
   5  11   0    4.60    1.30
   5  11   0    1.20    1.10
  -5  11   0    1.50    1.20
   0  12   0   14.30    1.60
  -1  12   0    0.10    0.90
   1  12   0   -0.20    0.90
  -2  12   0    8.20    1.40
   2  12   0    7.50    1.30
  -3  12   0   91.19    3.60
   3  12   0   89.19    3.60
   3  12   0   90.69    3.30
   4 -12   0   11.20    1.90
   4  12   0   12.60    1.70
   4  12   0   12.20    1.70
  -4  12   0   13.60    1.80
   5 -12   0   26.30    2.70
   5  12   0   22.20    2.30
  -5  12   0   23.00    2.50
   5  12   0   24.00    2.30
   0  13   0    3.90    1.20
  -1  13   0    4.70    1.30
   1  13   0    4.60    1.30
   2  13   0   35.80    2.50
  -2  13   0   40.50    2.50
   3  13   0    6.90    1.40
  -3  13   0    6.20    1.40
   4 -13   0   10.70    2.00
  -4  13   0    8.20    1.50
   4  13   0    8.30    1.60
   4  13   0    6.00    1.40
   0  14   0   70.19    3.40
   1  14   0   48.40    2.80
  -1  14   0   43.90    2.70
  -2  14   0    4.50    1.40
   2  14   0    6.50    1.50
   3  14   0    2.50    1.40
  -3  14   0    3.80    1.40
   0  15   0    0.70    1.10
  -1  15   0   23.10    2.40
   1  15   0   21.80    2.30
  -2  15   0   24.10    2.50
   2  15   0   28.50    2.60
   0   0  -1   -2.60    0.10
  -1   0  -1 4415.86   75.59
  -1   0   1 4325.47   74.69
   1   0  -1 4192.48   75.19
  -2   0  -1    0.70    0.40
  -2   0   1    0.40    0.30
  -3   0   1  286.97    5.70
  -3   0  -1  288.47    5.90
   4   0  -1   92.39    2.60
  -4   0   1   89.39    2.50
  -4   0  -1   87.49    2.60
   5   0  -1   13.30    1.20
   5   0  -1   15.10    1.10
   6   0  -1    4.50    0.90
   6   0   1    4.60    1.00
   7   0  -1    0.40    0.90
   7   0   1    1.00    0.90
   0  -1  -1   -2.70    0.20
   0   1  -1   -2.50    0.20
   0   1  -1   -2.30    0.20
   0   1   1   -1.90    0.30
   0  -1  -1   -2.40    0.30
   1  -1   1  126.19    2.50
   1   1  -1  124.49    2.40
  -1   1   1  121.99    2.40
  -1   1  -1  125.19    2.50
   1   1   1  119.99    2.50
   1  -1  -1  124.59    2.40
  -2   1   1  162.48    3.20
   2   1  -1  153.98    3.20
  -2   1  -1  163.08    3.40
   2  -1  -1  162.48    3.20
   2   1   1  149.29    3.30
   3   1  -1    3.00    0.50
  -3   1   1    2.70    0.50
  -3   1  -1    3.30    0.60
   3   1   1    1.80    0.50
   3  -1  -1    2.40    0.50
  -4   1   1   -0.40    0.50
   4   1  -1    0.90    0.50
   4   1  -1    0.00    0.40
   4   1   1    0.20    0.50
  -4   1  -1   -0.10    0.60
   4  -1  -1    0.10    0.40
   5   1  -1   24.60    1.60
   5   1  -1   25.20    1.30
  -5   1   1   26.30    1.50
   5   1   1   23.00    1.40
   5  -1  -1   26.50    1.40
  -5   1  -1   27.90    1.60
   6   1  -1   90.59    3.10
   6  -1   1   88.09    2.90
   6   1   1   92.59    3.10
   6  -1  -1   95.89    3.10
   7  -1   1    3.90    1.10
   7   1  -1    1.20    1.00
   7   1   1    3.10    1.10
   0   2  -1 3272.87   57.79
   0   2   1 3322.47   58.19
   0   2  -1 3228.98   56.99
   0  -2  -1 3301.77   58.69
   1   2  -1 3001.60   52.59
   1  -2   1 3015.30   53.49
  -1   2   1 3043.60   52.89
   1  -2  -1 2943.81   53.79
  -1   2  -1 2903.11   52.49
   1   2   1 2873.81   52.59
   1  -2  -1 3060.59   51.79
   2  -2   1  558.24   10.50
   2   2  -1  583.74   10.40
  -2   2   1  571.04   10.30
  -2   2  -1  577.34   10.50
   2  -2  -1  565.74   10.60
   2  -2  -1  579.94   10.20
   2   2   1  573.24   10.50
   3  -2   1    3.10    0.60
  -3   2   1    3.00    0.50
   3   2  -1    2.50    0.50
   3  -2  -1    4.30    0.50
  -3   2  -1    2.90    0.60
   3   2   1    2.80    0.50
   4  -2   1   72.19    2.40
   4   2  -1   71.79    2.10
  -4   2   1   74.39    2.20
   4  -2  -1   73.09    2.10
  -4   2  -1   69.29    2.30
   4   2   1   70.19    2.20
  -5   2   1   79.39    2.60
   5  -2   1   81.99    2.50
   5   2  -1   80.19    2.50
   5   2  -1   80.39    2.80
   5  -2   1   77.89    2.90
   5   2   1   83.29    2.70
  -5   2  -1   83.79    2.80
   5  -2  -1   80.99    2.50
   6   2  -1    2.90    1.10
   6  -2   1    6.00    1.20
   6  -2  -1    4.10    1.20
   7  -2   1    2.60    1.10
   7   2  -1    2.60    1.00
   7  -2  -1    5.80    1.40
   7   2   1    3.70    1.10
   0  -3  -1  918.31   16.20
   0   3  -1  899.01   16.00
   0   3  -1  919.61   16.10
   0   3   1  911.11   16.10
   1  -3   1  745.93   13.60
  -1   3   1  754.42   13.40
   1   3  -1  749.33   13.40
   1  -3  -1  778.92   13.20
   1  -3  -1  748.73   13.60
  -1   3  -1  742.13   13.50
  -2   3   1 1031.90   18.10
   2   3  -1 1023.70   18.10
   2  -3   1 1024.30   18.40
   2   3   1 1002.20   18.30
   2  -3  -1 1007.70   18.40
   2  -3  -1 1044.20   18.30
  -2   3  -1 1025.20   18.20
   3  -3   1  167.78    4.00
   3   3  -1  166.28    3.70
  -3   3   1  164.98    3.70
  -3   3  -1  162.78    3.80
   3  -3  -1  160.48    4.00
   3   3   1  167.18    3.80
   3  -3  -1  165.48    3.40
  -4   3   1  130.89    3.30
   4  -3   1  131.79    3.70
   4   3  -1  134.19    3.30
  -4   3  -1  128.49    3.40
   4   3   1  131.19    3.40
   4  -3  -1  134.39    3.10
   4  -3  -1  132.39    3.80
   5   3  -1  178.98    4.50
   5   3  -1  191.78    4.90
   5  -3   1  193.68    5.10
  -5   3   1  193.78    4.70
   5  -3  -1  196.18    5.30
   5   3   1  191.58    4.70
  -5   3  -1  191.38    4.80
   6  -3   1   36.20    2.20
   6   3  -1   35.10    2.10
   6  -3  -1   31.70    2.30
   7   3  -1   49.10    2.60
   7  -3   1   43.90    2.70
   7  -3  -1   49.00    3.00
   7   3   1   50.39    2.70
   0   4  -1  291.07    5.80
   0   4  -1  303.87    5.40
   0   4   1  292.87    5.80
  -1   4   1 1183.58   20.60
   1   4  -1 1157.48   20.60
   1  -4   1 1153.88   20.70
   1  -4  -1 1154.58   20.80
   1   4   1 1157.48   20.60
  -1   4  -1 1166.68   20.60
   2  -4   1 1559.34   26.80
   2  -4   1 1541.85   27.50
   2   4  -1 1545.95   27.20
  -2   4   1 1564.84   27.20
  -2   4  -1 1537.65   27.30
   2  -4  -1 1504.45   27.50
   2  -4  -1 1584.54   27.20
   2   4   1 1543.35   27.40
  -3   4   1  199.98    4.40
   3   4  -1  200.88    4.40
   3  -4   1  208.48    4.70
   3  -4   1  194.98    3.80
   3  -4  -1  200.68    3.90
  -3   4  -1  197.38    4.50
   3   4   1  199.28    4.50
   3  -4  -1  196.58    4.80
   4   4  -1   50.99    1.90
   4  -4   1   51.59    2.20
  -4   4   1   51.99    1.90
   4   4   1   48.00    2.00
  -4   4  -1   50.99    2.00
   4  -4  -1   51.39    2.30
   5  -4   1   35.20    2.10
   5   4  -1   35.30    1.70
   5   4  -1   32.20    1.90
  -5   4   1   37.60    1.80
   5   4   1   32.90    1.80
  -5   4  -1   35.70    1.90
   5  -4  -1   34.90    2.10
   6  -4   1   49.99    2.70
   6   4  -1   50.29    2.60
   6  -4  -1   49.40    2.80
   7   4  -1  154.78    5.00
   7  -4   1  158.28    5.20
   7  -4  -1  159.78    5.40
   7   4   1  162.18    5.00
   0   5  -1   43.80    1.50
   0   5   1   43.60    1.50
   0   5  -1   44.10    1.20
   1  -5   1  411.26    8.10
  -1   5   1  399.86    7.80
   1   5  -1  408.66    7.90
  -1   5  -1  398.16    7.90
   1  -5  -1  404.76    8.10
   1   5   1  408.96    7.90
   2   5  -1 1147.19   21.00
   2  -5   1 1175.78   21.20
  -2   5   1 1183.48   21.00
   2  -5  -1 1161.58   21.30
   2   5   1 1191.68   21.10
  -2   5  -1 1153.28   21.00
  -3   5   1  227.78    5.00
   3   5  -1  227.48    5.00
   3  -5   1  226.08    5.30
   3  -5  -1  225.78    5.40
   3   5   1  227.88    5.10
  -3   5  -1  224.48    5.10
  -4   5   1    7.30    1.00
   4  -5   1    6.90    1.10
   4   5  -1    8.60    1.00
   4  -5  -1    7.90    1.20
   4   5   1    7.90    1.00
  -4   5  -1    6.10    1.00
   5   5  -1   15.40    1.50
  -5   5   1   16.80    1.40
   5   5  -1   14.40    1.30
   5  -5   1   16.10    1.60
  -5   5  -1   16.00    1.40
   5   5   1   15.60    1.50
   5  -5  -1   16.70    1.80
   6  -5   1  222.88    6.10
   6   5  -1  205.28    5.80
   6  -5  -1  213.68    6.20
   7   5  -1   16.90    2.00
   7  -5   1   15.70    2.00
   7   5   1   14.50    1.90
   7  -5  -1   17.30    2.20
   0   6  -1 1456.05   25.10
   0   6  -1 1455.25   25.70
   0   6   1 1418.96   25.70
  -1   6   1  762.52   14.30
   1   6  -1  791.82   14.40
   1  -6   1  758.22   14.60
   1   6   1  758.42   14.40
   1  -6  -1  776.52   14.70
  -1   6  -1  754.42   14.40
  -1   6  -1  817.42   13.40
   2  -6   1   42.00    1.90
  -2   6   1   41.60    1.70
   2   6  -1   42.10    1.70
   2   6   1   41.50    1.70
  -2   6  -1   42.20    1.70
   2  -6  -1   44.00    1.90
  -3   6   1   50.89    1.90
   3  -6   1   49.99    2.20
   3   6  -1   49.50    1.90
   3  -6  -1   48.60    2.20
  -3   6  -1   47.60    2.00
   3   6   1   51.49    2.00
  -4   6   1   31.20    1.70
   4   6  -1   32.40    1.70
   4  -6   1   35.20    2.00
   4   6   1   30.10    1.80
  -4   6  -1   33.30    1.80
   4  -6  -1   32.30    2.00
   5  -6   1   29.00    2.00
   5   6  -1   29.40    1.90
  -5   6   1   28.10    1.80
   5   6  -1   31.90    1.80
   5  -6  -1   30.60    2.10
   5   6   1   27.20    1.80
  -5   6  -1   29.10    1.90
   6   6  -1   54.89    2.80
   6  -6   1   56.39    3.00
   6  -6  -1   62.99    3.10
   7   6  -1   89.89    3.80
   7  -6   1   86.19    4.80
   7   6   1   91.09    3.80
   7  -6  -1   92.29    4.20
   0   7   1   13.60    1.20
   0   7  -1   11.80    0.70
   0   7  -1   11.70    1.10
  -1   7   1 1037.70   19.20
   1   7  -1 1046.10   19.20
   1  -7  -1 1041.50   19.50
   1   7   1 1047.80   19.20
  -1   7  -1 1057.69   19.20
  -2   7   1   15.50    1.30
   2  -7   1   16.00    1.40
   2   7  -1   13.00    1.20
   2  -7  -1   12.10    1.30
   2   7   1   13.60    1.20
  -2   7  -1   12.60    1.20
   3   7  -1   19.30    1.30
  -3   7   1   17.30    1.30
   3  -7   1   18.00    1.60
   3  -7  -1   18.10    1.60
  -3   7  -1   18.00    1.30
   3   7   1   19.10    1.50
   4  -7   1   52.69    2.60
   4   7  -1   55.29    2.40
   4   7  -1   52.09    2.30
  -4   7   1   52.69    2.20
  -4   7  -1   51.39    2.30
   4  -7  -1   52.79    2.50
   4   7   1   51.99    2.30
  -5   7   1   29.20    1.90
   5   7  -1   30.20    2.00
   5  -7   1   28.60    2.10
   5   7  -1   26.10    1.80
   5  -7  -1   27.20    2.10
   5   7   1   26.90    1.90
  -5   7  -1   29.70    1.90
   6  -7   1   32.10    2.50
   6   7  -1   33.20    2.30
   6  -7  -1   33.80    2.60
   6   7   1   31.40    2.20
   7   7  -1   15.20    2.00
   7   7   1   15.00    1.90
   7  -7  -1   19.10    2.40
   0   8  -1  303.87    6.70
   0   8  -1  313.77    5.90
   0   8   1  306.97    6.70
   1   8  -1  286.37    5.80
   1   8  -1  286.57    6.30
  -1   8   1  283.47    6.30
   1   8   1  284.97    6.40
  -1   8  -1  272.67    6.30
   2   8  -1    7.60    1.00
  -2   8   1    9.20    1.10
   2  -8   1    8.60    1.20
   2   8  -1   12.00    1.10
   2  -8  -1    9.90    1.30
  -2   8  -1    9.40    1.10
   2   8   1    7.10    1.10
  -3   8   1    2.50    0.80
   3  -8   1    0.30    0.70
   3   8  -1    1.70    0.90
   3   8  -1    1.60    0.70
   3   8   1    1.20    0.80
   3  -8  -1    1.80    1.00
  -3   8  -1    1.90    0.80
   4   8  -1  359.86    8.10
   4   8  -1  372.16    8.20
  -4   8   1  369.06    8.10
   4  -8   1  352.86    8.50
  -4   8  -1  367.56    8.20
   4   8   1  363.86    8.20
   4  -8  -1  368.86    8.70
   5   8  -1   18.60    1.80
  -5   8   1   15.10    1.60
   5  -8   1   18.60    2.00
   5   8  -1   16.50    1.60
   5  -8  -1   19.20    2.00
  -5   8  -1   15.60    1.70
   5   8   1   18.60    1.80
   6   8  -1    0.00    1.00
   6  -8   1    0.90    1.00
   6  -8  -1    1.20    1.10
   6   8   1   -0.60    0.90
   0   9   1  121.59    3.60
   0   9  -1  124.69    3.60
   1   9  -1  231.08    5.50
  -1   9   1  222.38    5.50
   1   9  -1  228.48    4.90
  -1   9  -1  227.68    5.50
   1   9   1  226.28    5.50
   2   9  -1  205.28    4.80
   2  -9   1  199.88    5.40
   2   9  -1  205.78    5.10
  -2   9   1  206.28    5.10
  -2   9  -1  200.48    5.20
   2  -9  -1  205.18    5.50
   2   9   1  198.88    5.20
   3   9  -1   20.20    1.50
   3  -9   1   17.90    1.80
   3   9  -1   19.20    1.70
  -3   9   1   18.20    1.50
  -3   9  -1   18.50    1.70
   3   9   1   18.50    1.70
   3  -9  -1   18.10    1.80
  -4   9   1   36.80    2.00
   4   9  -1   33.70    2.00
   4   9  -1   38.80    2.20
   4  -9   1   36.30    2.30
   4  -9  -1   35.90    2.40
  -4   9  -1   35.90    2.10
   4   9   1   33.80    2.10
   5   9  -1    1.60    0.90
   5   9  -1    2.30    1.10
   5  -9   1    1.80    1.10
   5  -9  -1    0.20    1.00
  -5   9  -1    2.80    1.00
   5   9   1    2.30    1.10
   6   9  -1    1.60    1.20
   6  -9   1    2.30    1.40
   6   9   1    3.50    1.20
   6  -9  -1    2.20    1.40
   0  10   1    2.30    0.90
   0  10  -1    1.20    0.80
   1  10  -1  128.29    3.90
  -1  10   1  117.39    3.70
  -1  10  -1  124.69    3.80
   1  10   1  119.99    3.80
   2  10  -1    9.30    1.30
  -2  10   1   12.40    1.40
   2  10  -1    8.90    1.10
  -2  10  -1    9.90    1.30
   2 -10  -1    8.90    1.40
   2  10   1   11.50    1.50
   3  10  -1   48.70    2.30
   3  10  -1   47.50    2.40
  -3  10   1   57.49    2.50
   3 -10   1   53.69    2.80
  -3  10  -1   48.80    2.40
   3 -10  -1   46.50    2.60
   3  10   1   50.19    2.50
  -4  10   1    1.60    1.00
   4  10  -1    2.40    1.00
   4  10  -1    2.90    1.10
   4 -10   1    1.20    1.20
   4  10   1    2.40    1.10
   4 -10  -1    2.10    1.30
  -4  10  -1    0.30    1.00
   5  10  -1    9.50    1.50
   5 -10   1   11.70    1.90
   5  10  -1   10.90    1.50
  -5  10  -1   11.20    1.60
   5 -10  -1   11.90    1.90
   5  10   1   13.20    1.60
   5  10   1    9.40    1.60
   6  10  -1   28.60    2.50
   6 -10   1   26.30    2.60
   6  10   1   30.90    2.40
   6 -10  -1   26.50    2.70
   0  11  -1  162.68    4.70
   0  11   1  169.08    4.80
  -1  11   1    1.40    0.90
   1  11  -1    1.10    0.90
  -1  11  -1    1.10    0.80
   1  11   1    1.90    1.00
  -2  11   1   45.50    2.30
   2  11  -1   42.20    2.40
   2  11  -1   45.00    2.00
  -2  11  -1   44.10    2.30
   2  11   1   46.00    2.40
   3  11  -1   35.70    2.20
   3  11  -1   36.50    2.00
   3 -11   1   37.40    2.50
  -3  11   1   32.70    2.10
  -3  11  -1   32.80    2.20
   3 -11  -1   36.70    2.50
   3  11   1   37.40    2.30
  -4  11   1   58.09    2.90
   4 -11   1   65.79    3.40
   4  11  -1   59.89    2.80
   4  11  -1   65.99    3.00
   4 -11  -1   60.79    3.30
  -4  11  -1   64.29    3.10
   4  11   1   56.19    3.00
   4  11   1   61.99    2.80
   5 -11   1   31.20    2.80
   5  11  -1   36.60    2.50
   5  11  -1   39.00    2.60
   5  11   1   34.60    2.40
   5  11   1   30.50    2.30
  -5  11  -1   32.00    2.50
   5 -11  -1   38.20    2.80
   0  12   1   50.79    2.70
   0  12  -1   58.99    2.80
   1  12  -1    5.90    1.20
  -1  12   1    7.90    1.30
  -1  12  -1    6.40    1.30
   1  12   1    6.70    1.30
  -2  12   1   11.70    1.50
   2  12  -1   11.20    1.60
  -2  12  -1   16.10    1.70
   2  12   1   11.50    1.60
   3  12  -1   20.30    2.00
   3  12  -1   16.50    1.60
  -3  12   1   20.70    1.90
   3  12   1   21.20    1.70
   3 -12  -1   19.70    2.20
  -3  12  -1   23.00    2.10
   3  12   1   22.20    2.20
   4  12  -1   22.20    2.10
  -4  12   1   21.30    2.00
   4  12  -1   26.10    2.00
   4 -12   1   21.80    2.40
   4  12   1   22.20    2.00
   4 -12  -1   29.50    2.80
   4  12   1   24.60    2.30
  -4  12  -1   23.20    2.10
   5  12  -1   47.90    3.00
   5  12  -1   42.20    2.60
   5 -12   1   43.30    3.20
   5  12   1   50.89    2.90
   5  12   1   48.80    2.90
   5 -12  -1   44.70    3.20
  -5  12  -1   45.00    2.90
   0  13  -1   13.40    1.70
   0  13   1   12.40    1.80
  -1  13   1   24.50    2.10
   1  13  -1   19.90    2.00
   1  13   1   25.70    2.30
  -1  13  -1   27.30    2.30
   2  13  -1    7.60    1.50
  -2  13   1    5.40    1.30
   2  13   1    4.30    1.30
  -2  13  -1    3.20    1.20
   3  13  -1   11.60    1.60
  -3  13   1   10.30    1.60
   3  13   1    9.30    1.60
  -3  13  -1   10.70    1.80
   4  13  -1   21.30    2.00
   4  13  -1   25.30    2.40
  -4  13   1   23.80    2.30
   4  13   1   23.90    2.30
  -4  13  -1   28.80    2.60
   4  13   1   29.10    2.30
   4 -13  -1   26.60    2.80
   0  14  -1   30.20    2.30
   0  14   1   27.00    2.40
   1  14  -1    0.20    1.10
  -1  14   1    1.80    1.10
  -1  14  -1    1.30    1.10
   1  14   1    1.50    1.30
   2  14  -1   19.20    2.10
  -2  14   1   21.30    2.20
  -2  14  -1   21.60    2.20
   2  14   1   20.40    2.20
   3  14  -1   17.50    2.20
  -3  14   1   21.00    2.20
  -3  14  -1   13.60    1.90
   3  14   1   19.20    2.20
   0  15   1    2.70    1.20
   0  15  -1    0.80    1.30
   1  15  -1   18.80    2.10
  -1  15   1   19.30    2.30
   1  15   1   15.90    2.10
  -1  15  -1   16.40    2.10
  -2  15   1   34.80    2.60
   2  15  -1   39.60    2.80
   2  15   1   39.20    3.00
  -2  15  -1   27.70    2.60
   0   0  -2 1805.42   31.30
   0   0  -2 1727.63   31.50
   1   0  -2    4.50    0.40
  -1   0  -2    7.10    0.60
  -2   0  -2  443.86    8.40
  -2   0   2  456.35    8.00
   2   0  -2  444.56    8.20
   3   0  -2   17.80    0.90
  -3   0  -2   16.60    1.10
  -3   0   2   18.40    0.90
  -4   0  -2   20.80    1.30
   4   0  -2   20.20    1.10
  -5   0  -2   48.90    2.20
   5   0  -2   52.49    2.00
   6   0  -2   12.00    1.40
   6   0   2   11.30    1.30
   7   0   2    0.60    0.80
   7   0  -2    0.20    0.80
   0  -1  -2   21.60    0.60
   0   1   2   20.00    0.60
   0   1  -2   21.70    0.60
  -1   1   2 2524.45   43.70
   1  -1   2 2382.76   44.00
   1   1  -2 2475.05   43.60
   1   1  -2 2523.35   44.70
  -1   1  -2 2460.65   44.40
   1  -1  -2 2551.24   44.20
   1   1   2 2529.25   44.90
  -2   1   2   55.49    1.30
   2   1  -2   51.69    1.30
   2   1  -2   57.29    1.60
   2  -1  -2   55.09    1.40
  -2   1  -2   53.59    1.60
   3   1  -2   36.90    1.40
   3   1  -2   32.10    1.10
  -3   1   2   38.10    1.20
  -3   1  -2   35.80    1.40
   3  -1  -2   34.70    1.30
   4   1  -2   44.90    1.50
  -4   1   2   44.20    1.60
   4   1  -2   46.80    1.80
   4   1   2   45.00    1.80
   4  -1  -2   44.20    1.60
  -4   1  -2   44.30    1.80
   5   1  -2   35.70    1.80
  -5   1  -2   31.70    1.90
   5  -1  -2   41.30    1.70
   5   1   2   35.70    1.70
   6   1  -2   24.00    1.70
   6  -1  -2   26.90    1.60
  -6   1  -2   23.50    1.80
   6   1   2   24.00    1.60
   7   1  -2   12.20    1.60
   7   1   2    8.60    1.40
   0   2  -2 3391.06   57.69
   0   2  -2 3325.07   58.49
   0  -2  -2 3191.88   58.09
   0  -2  -2 3262.67   58.09
   1  -2   2   67.39    1.60
   1   2  -2   66.69    1.60
   1   2  -2   66.19    1.50
  -1   2   2   68.89    1.50
  -1   2  -2   64.29    1.70
  -1   2  -2   67.59    1.40
   1  -2  -2   66.29    1.40
   1  -2  -2   64.59    1.70
   1   2   2   61.59    1.60
   2   2  -2    4.90    0.50
  -2   2   2    6.20    0.50
   2  -2   2    4.70    0.50
   2   2  -2    5.10    0.60
   2  -2  -2    4.60    0.40
   2  -2  -2    5.40    0.70
  -2   2  -2    5.50    0.60
   2   2   2    5.70    0.60
   3   2  -2  201.18    4.20
   3   2  -2  209.98    4.60
  -3   2   2  204.78    4.20
   3  -2   2  207.38    4.50
   3   2   2  211.58    4.50
   3  -2  -2  205.48    4.20
  -3   2  -2  210.38    4.60
   4   2  -2  127.49    3.40
   4  -2   2  122.39    3.40
  -4   2   2  126.29    3.10
   4   2  -2  126.49    3.00
   4   2   2  127.29    3.30
   4  -2  -2  122.09    3.00
  -4   2  -2  122.79    3.40
   5  -2   2  140.49    4.00
   5   2  -2  138.19    3.90
   5  -2  -2  139.09    3.60
  -5   2  -2  140.89    3.90
   5   2   2  136.19    3.80
   6  -2   2   16.40    1.60
   6   2  -2   16.60    1.60
   6   2   2   18.20    1.60
   6  -2  -2   18.20    1.90
  -6   2  -2   19.30    1.70
   7   2  -2   54.79    2.70
   7  -2  -2   61.09    3.10
   7   2   2   61.89    2.80
   0  -3  -2  129.89    2.90
   0   3  -2  133.09    2.80
   0   3  -2  130.99    2.60
   0   3   2  130.29    2.80
  -1   3   2  457.55    8.40
   1   3  -2  448.36    8.40
   1  -3   2  473.75    8.60
   1   3  -2  461.95    8.50
   1  -3  -2  463.15    8.70
   1  -3  -2  469.05    8.20
   1   3   2  463.75    8.60
  -1   3  -2  466.35    8.10
  -1   3  -2  453.75    8.60
   2   3  -2  422.46    7.80
   2   3  -2  426.96    8.00
   2  -3   2  409.36    8.00
  -2   3   2  410.46    7.80
   2   3   2  420.46    8.00
   2  -3  -2  413.06    8.20
   2  -3  -2  429.86    7.50
  -2   3  -2  412.96    8.00
   3   3  -2  171.38    3.80
  -3   3   2  176.58    3.80
   3  -3   2  178.48    4.10
   3   3  -2  169.88    4.10
  -3   3  -2  167.38    4.00
   3  -3  -2  174.78    3.60
   3   3   2  176.68    4.00
   3  -3  -2  179.68    4.30
   4   3  -2  179.78    4.50
   4   3  -2  186.18    4.10
   4  -3   2  181.18    4.50
  -4   3   2  183.68    4.20
   4   3   2  181.88    4.40
  -4   3  -2  186.18    4.50
   4  -3  -2  180.58    4.70
   4  -3  -2  178.58    4.00
   5  -3   2   20.40    1.60
   5   3  -2   26.20    1.70
  -5   3  -2   24.10    1.70
   5  -3  -2   23.20    1.80
   5   3   2   22.90    1.60
   6   3  -2  252.07    6.40
   6  -3   2  265.57    6.70
  -6   3  -2  254.77    6.40
   6   3   2  262.07    6.30
   6  -3  -2  260.37    6.90
   7   3  -2   11.50    1.70
   7  -3  -2   14.20    1.90
   7   3   2   11.90    1.60
   0   4  -2   63.89    1.80
   0  -4  -2   56.49    1.80
   0   4  -2   62.59    1.40
   0   4   2   60.79    1.70
   1  -4   2 1287.47   23.50
   1   4  -2 1319.47   23.40
  -1   4   2 1346.47   23.40
   1   4  -2 1327.77   23.30
   1   4   2 1336.77   23.50
   1  -4  -2 1328.17   23.60
  -1   4  -2 1328.87   23.50
   1  -4  -2 1344.97   23.70
  -1   4  -2 1338.07   23.10
   2   4  -2  100.79    2.60
  -2   4   2  105.09    2.50
   2  -4   2  105.19    2.70
   2   4  -2  104.19    2.60
   2  -4  -2  101.39    2.80
   2  -4  -2  105.09    2.10
   2   4   2  103.89    2.70
  -2   4  -2  105.59    2.70
   3   4  -2   20.50    1.10
   3  -4   2   21.00    1.30
   3   4  -2   17.00    1.20
  -3   4   2   20.80    1.10
   3  -4  -2   20.20    0.80
   3  -4  -2   20.50    1.40
   3   4   2   19.80    1.20
  -3   4  -2   21.90    1.30
   4  -4   2   73.99    2.60
   4   4  -2   78.49    2.30
   4   4  -2   75.39    2.60
  -4   4   2   80.99    2.40
   4  -4  -2   75.89    2.20
  -4   4  -2   76.59    2.60
   4   4   2   75.29    2.60
   4  -4  -2   79.59    2.90
   5  -4   2  126.99    3.90
   5   4  -2  119.79    3.70
   5  -4  -2  122.19    4.00
   5   4   2  129.29    3.70
  -5   4  -2  124.99    3.80
   6   4  -2  120.69    4.00
   6  -4   2  114.49    4.00
   6   4   2  124.59    3.80
  -6   4  -2  111.99    3.80
   6  -4  -2  115.79    4.20
   7   4  -2   17.50    1.90
   7  -4  -2   14.90    2.10
   7   4   2   14.50    1.70
   0   5   2 1227.58   21.90
   0   5  -2 1224.88   21.90
   0   5  -2 1237.28   21.40
   1   5  -2 1816.02   32.30
  -1   5   2 1842.42   32.50
   1   5  -2 1855.31   32.50
   1  -5   2 1841.42   32.70
  -1   5  -2 1882.71   32.60
   1  -5  -2 1854.01   32.80
   1   5   2 1835.92   32.60
  -1   5  -2 1896.11   32.20
   2   5  -2  167.68    3.90
   2   5  -2  170.98    3.90
   2  -5   2  163.88    4.00
  -2   5   2  169.28    3.90
   2  -5  -2  177.28    3.20
   2   5   2  169.78    4.00
   2  -5  -2  170.28    4.20
  -2   5  -2  173.08    4.00
   3   5  -2   70.89    2.40
   3  -5   2   74.19    2.50
  -3   5   2   69.69    2.20
   3   5  -2   71.79    2.20
   3  -5  -2   70.39    2.50
   3   5   2   70.99    2.40
  -3   5  -2   70.99    2.30
   4  -5   2   68.99    2.60
  -4   5   2   72.69    2.40
   4   5  -2   71.79    2.60
   4   5  -2   68.89    2.30
  -4   5  -2   72.09    2.50
   4  -5  -2   71.79    2.90
   4   5   2   71.19    2.50
   5   5  -2   61.39    2.60
   5  -5   2   65.79    2.70
  -5   5  -2   59.79    2.60
   5  -5  -2   56.89    2.80
   5   5   2   61.69    2.50
   6  -5   2   25.40    2.10
   6   5  -2   23.80    2.10
   6   5   2   21.50    1.90
   6  -5  -2   26.20    2.20
  -6   5  -2   24.90    1.80
   7   5  -2    0.20    1.00
   7   5   2    1.10    1.10
   7  -5  -2    3.10    1.40
   0   6  -2  433.66    8.60
   0   6  -2  445.66    8.00
   0   6   2  429.06    8.60
   1   6  -2  230.88    5.00
   1   6  -2  227.48    4.70
  -1   6   2  216.98    4.90
   1   6   2  221.38    5.00
  -1   6  -2  220.18    5.00
  -1   6  -2  231.98    4.10
   1  -6  -2  226.18    5.20
   2   6  -2   54.99    1.90
   2   6  -2   53.49    1.90
  -2   6   2   55.99    1.90
   2  -6   2   56.19    2.10
  -2   6  -2   53.89    2.00
   2  -6  -2   54.39    2.20
   2   6   2   52.99    2.00
  -3   6   2   81.39    2.50
   3  -6   2   84.99    2.80
   3   6  -2   82.89    2.50
   3   6  -2   81.69    2.60
  -3   6  -2   82.09    2.70
   3  -6  -2   78.59    2.80
   3   6   2   76.09    2.60
   4  -6   2  100.99    3.40
   4   6  -2   98.89    3.20
   4   6  -2  102.99    3.00
  -4   6   2  101.99    3.00
   4  -6  -2  104.19    3.60
   4   6   2  103.49    3.30
  -4   6  -2   98.39    3.20
   5  -6   2   10.40    1.40
   5   6  -2   11.90    1.50
   5   6  -2   10.00    1.70
  -5   6  -2    9.50    1.30
   5   6   2   10.80    1.30
   5  -6  -2    9.20    1.50
   6   6  -2    0.80    0.90
   6  -6   2    1.20    1.00
  -6   6  -2   -0.20    0.90
   6  -6  -2    0.90    1.10
   6   6   2    0.40    0.90
   7   6  -2   51.69    2.90
   7  -6  -2   50.39    3.30
   7   6   2   55.39    3.00
   0   7   2   76.29    2.50
   0   7  -2   78.49    1.90
   0   7  -2   73.89    2.40
  -1   7   2   28.10    1.50
   1   7  -2   28.50    1.20
   1   7  -2   26.70    1.40
  -1   7  -2   25.90    1.40
   1   7   2   29.40    1.50
   1  -7  -2   22.30    1.60
   2   7  -2  328.17    7.00
  -2   7   2  335.97    7.00
   2  -7   2  343.77    7.40
   2   7  -2  326.17    6.90
  -2   7  -2  330.57    7.10
   2  -7  -2  340.27    7.50
   3  -7   2   33.20    1.90
   3   7  -2   30.30    1.70
   3   7  -2   30.30    1.60
  -3   7   2   32.00    1.60
   3   7   2   29.30    1.70
   3  -7  -2   32.00    2.00
  -3   7  -2   30.20    1.80
   4  -7   2   35.80    2.10
   4   7  -2   31.90    1.80
  -4   7   2   31.60    1.70
   4   7  -2   33.40    1.90
   4  -7  -2   35.40    2.10
   4   7   2   33.30    1.90
  -4   7  -2   31.10    1.90
   5  -7   2   11.10    1.50
   5   7  -2   13.70    1.60
  -5   7  -2   12.40    1.50
   5  -7  -2   12.60    1.70
   5   7   2   12.20    1.50
   6  -7   2   35.10    2.50
   6   7  -2   38.20    2.40
   6   7   2   38.00    2.40
   6  -7  -2   40.40    2.90
  -6   7  -2   41.70    2.40
   7   7  -2   12.40    2.00
   7   7   2   12.80    1.80
   7  -7  -2   11.60    2.10
   0   8  -2   57.19    2.20
   0   8   2   51.09    2.10
   0   8  -2   51.09    1.50
   1   8  -2  169.58    3.80
  -1   8   2  160.78    4.20
   1   8  -2  165.78    4.20
  -1   8  -2  170.08    4.30
   1   8   2  174.08    4.40
   1  -8  -2  156.28    4.50
   2   8  -2  119.79    3.20
   2  -8   2  117.69    3.70
   2   8  -2  120.09    3.40
  -2   8   2  118.89    3.40
   2   8   2  124.59    3.60
  -2   8  -2  116.39    3.50
   2  -8  -2  124.89    3.90
   3  -8   2  146.89    4.30
   3   8  -2  153.08    4.10
   3   8  -2  144.09    4.00
  -3   8   2  141.69    3.90
  -3   8  -2  149.49    4.20
   3  -8  -2  150.48    4.50
   3   8   2  141.39    4.10
  -4   8   2   37.40    2.00
   4  -8   2   34.70    2.20
   4   8  -2   32.90    1.90
   4   8  -2   31.80    1.90
  -4   8  -2   33.40    2.00
   4   8   2   31.50    2.00
   4  -8  -2   32.20    2.20
   5   8  -2   52.39    2.60
   5  -8   2   48.10    2.60
  -5   8  -2   52.99    2.60
   5   8   2   51.39    2.60
   5  -8  -2   51.79    2.90
   6   8  -2   14.80    1.80
   6  -8   2   14.10    1.90
   6  -8  -2   15.00    2.00
   6   8   2   12.80    1.70
   0   9  -2  574.04   11.50
   0   9   2  562.94   11.40
   1   9  -2  272.57    5.60
  -1   9   2  267.87    6.20
   1   9  -2  260.47    6.20
  -1   9  -2  264.87    6.20
   1   9   2  264.77    6.30
   2   9  -2  119.79    3.30
  -2   9   2  119.09    3.50
   2   9  -2  110.69    3.50
   2   9   2  116.99    3.60
   2  -9  -2  120.29    3.90
  -2   9  -2  119.19    3.60
   3  -9   2   28.40    2.10
   3   9  -2   26.50    1.70
  -3   9   2   25.30    1.70
   3   9  -2   24.70    1.70
   3   9   2   29.20    1.90
  -3   9  -2   25.60    1.80
   3  -9  -2   27.80    2.00
   4  -9   2    5.20    1.30
  -4   9   2    6.50    1.10
   4   9  -2    3.10    1.10
   4   9  -2    4.10    1.10
   4  -9  -2    4.20    1.20
   4   9   2    5.40    1.20
  -4   9  -2    4.50    1.10
   5  -9   2   67.69    3.20
   5   9  -2   73.09    3.10
   5   9   2   69.49    3.10
   5  -9  -2   70.69    3.40
  -5   9  -2   74.09    3.10
   6  -9   2   24.90    2.50
   6   9  -2   26.40    2.30
   6  -9  -2   25.20    2.60
   6   9   2   21.50    2.10
   0  10  -2    8.20    1.20
   0  10   2    9.70    1.30
   1  10  -2  241.68    6.00
  -1  10   2  243.98    6.00
   1  10   2  256.07    6.20
  -1  10  -2  252.77    6.10
   2  10  -2   90.89    2.80
  -2  10   2   89.69    3.20
   2  10  -2   86.29    3.20
  -2  10  -2   85.69    3.20
   2 -10  -2   86.99    3.50
   2  10   2   88.79    3.20
   3  10  -2   48.60    2.20
   3  10  -2   46.90    2.40
   3 -10   2   49.99    2.70
  -3  10   2   43.40    2.30
   3  10   2   47.70    2.40
   3 -10  -2   49.70    2.80
  -3  10  -2   46.60    2.50
  -4  10   2  110.39    3.70
   4  10  -2  107.39    3.80
   4  10  -2  112.09    3.80
   4 -10   2  114.19    4.20
   4  10   2  111.49    3.90
  -4  10  -2  111.19    4.00
   4 -10  -2  106.09    4.20
   5 -10   2   56.49    3.20
   5  10  -2   57.49    2.80
   5 -10  -2   57.09    3.40
   5  10   2   55.89    2.90
  -5  10  -2   58.09    3.00
   6 -10   2    5.10    2.00
   6  10  -2    4.00    1.40
   6  10   2    4.90    1.40
   6  10   2    5.40    1.40
   6 -10  -2    3.80    1.60
   0  11  -2  260.87    6.50
   0  11   2  254.57    6.40
   1  11  -2  130.59    4.10
  -1  11   2  131.29    4.10
   1  11   2  131.59    4.20
  -1  11  -2  130.39    4.10
  -2  11   2   35.40    2.10
   2  11  -2   38.10    1.80
   2  11  -2   37.50    2.20
  -2  11  -2   39.20    2.20
   2  11   2   33.40    2.30
   3  11  -2   13.30    1.70
  -3  11   2   13.90    1.60
   3  11  -2   13.00    1.40
   3 -11  -2   11.00    1.80
   3  11   2   12.90    1.70
  -3  11  -2   15.40    1.70
   4 -11   2   49.50    3.00
   4  11  -2   45.50    2.40
  -4  11   2   48.10    2.50
   4  11  -2   47.60    2.50
   4  11   2   50.59    2.80
   4 -11  -2   47.80    3.00
  -4  11  -2   54.49    2.90
   5  11  -2   20.80    2.10
   5 -11   2   21.40    2.40
   5 -11  -2   19.00    2.30
  -5  11  -2   20.20    2.20
   5  11   2   22.50    2.30
   0  12  -2  117.39    4.10
   0  12   2  121.49    4.10
  -1  12   2   15.40    1.70
   1  12  -2   19.70    1.90
  -1  12  -2   14.60    1.80
   1  12   2   14.80    1.70
  -2  12   2   18.30    1.80
   2  12  -2   23.60    2.10
   2  12   2   21.50    2.00
  -2  12  -2   20.90    2.00
  -3  12   2   63.99    2.90
   3  12  -2   64.29    2.80
   3  12  -2   71.99    3.10
   3 -12  -2   72.69    3.60
  -3  12  -2   60.89    3.20
   3  12   2   72.49    3.30
   4  12  -2    2.80    1.10
   4  12  -2    1.10    1.00
  -4  12   2    0.20    0.90
   4 -12   2    1.20    1.20
  -4  12  -2    1.00    1.10
   4  12   2    1.50    1.20
   4 -12  -2    2.80    1.30
   5 -12   2   84.99    4.20
   5  12  -2   84.99    3.60
   5  12   2   83.59    3.80
  -5  12  -2   79.39    3.80
   5 -12  -2   83.49    4.20
   5  12   2   77.39    3.60
   0  13  -2   29.00    2.40
   0  13   2   31.70    2.30
   1  13  -2   17.40    1.90
  -1  13   2   22.70    2.10
   1  13   2   22.30    2.20
  -1  13  -2   18.50    2.00
   2  13  -2   36.10    2.30
  -2  13   2   31.10    2.20
  -2  13  -2   34.40    2.40
   2  13   2   34.90    2.40
   3  13  -2   13.80    1.80
  -3  13   2   14.00    1.70
   3  13   2   10.40    1.70
  -3  13  -2   11.30    1.80
  -4  13   2   27.90    2.40
   4  13  -2   26.20    2.70
   4  13  -2   23.00    2.30
   4  13   2   23.20    2.50
   4  13   2   23.10    2.10
  -4  13  -2   28.80    2.50
   4 -13  -2   24.20    2.80
   0  14   2    3.80    1.30
   0  14  -2    3.10    1.30
   1  14  -2   21.00    2.10
  -1  14   2   19.90    2.00
   1  14   2   21.20    2.20
  -1  14  -2   21.40    2.20
  -2  14   2   11.10    1.70
   2  14  -2   12.60    1.80
  -2  14  -2   10.20    1.70
   2  14   2   11.10    1.80
   3  14  -2   30.60    2.40
  -3  14   2   30.40    2.30
   3  14   2   34.30    2.90
  -3  14  -2   28.00    2.50
   0  15  -2    9.50    1.80
   0  15   2    5.70    1.60
   1  15  -2    8.90    1.70
  -1  15   2   11.50    1.90
  -1  15  -2   13.30    1.90
   1  15   2    9.10    1.70
  -2  15   2   12.40    1.80
   2  15  -2   10.70    1.80
   2  15   2   13.10    2.30
  -2  15  -2    8.80    1.80
   0   0  -3   -0.10    0.30
   0   0  -3    0.20    0.20
   1   0  -3 1907.11   34.00
  -1   0  -3 1885.01   34.20
  -2   0  -3   57.29    1.70
   2   0  -3   53.19    1.50
  -3   0  -3   30.00    1.40
   3   0  -3   29.50    1.20
  -4   0  -3   18.00    1.40
   4   0  -3   17.50    1.20
   4   0  -3   18.10    0.90
  -5   0  -3   40.50    2.00
   5   0  -3   39.70    1.90
   6   0   3    9.40    1.20
   6   0  -3    7.60    1.20
   7   0   3    1.40    0.80
   7   0  -3    0.30    0.80
   0  -1  -3   10.70    0.50
   0  -1  -3   11.40    0.60
   0   1   3   10.20    0.50
   0   1  -3   10.30    0.50
   0   1  -3   10.90    0.60
   1   1  -3 1935.21   34.60
  -1   1   3 2013.30   34.60
   1   1  -3 1971.80   35.00
   1  -1   3 1996.30   35.10
   1  -1  -3 1980.40   49.20
  -1   1  -3 1972.20   35.30
  -1   1  -3 1988.50   35.10
  -2  -1  -3 1091.79   19.80
   2   1  -3 1121.19   19.30
   2   1  -3 1091.39   19.70
  -2   1   3 1124.39   19.50
  -2   1  -3 1113.39   19.80
   2  -1  -3 1126.19   19.60
  -3  -1  -3   41.60    1.70
   3   1  -3   43.70    1.30
   3   1  -3   42.50    1.60
  -3   1   3   46.90    1.30
   3  -1  -3   43.80    1.50
  -3   1  -3   46.20    1.70
   4   1  -3  136.29    3.50
  -4   1   3  138.39    3.20
   4   1  -3  133.29    3.10
  -4   1  -3  134.99    3.70
   4  -1  -3  136.49    3.40
   5   1  -3  149.59    4.10
  -5   1  -3  155.98    4.30
   5  -1  -3  153.78    3.90
   5   1   3  153.88    4.10
   6   1  -3   66.69    2.70
   6   1   3   64.99    2.60
  -6   1  -3   60.69    2.70
   6  -1  -3   63.69    2.50
   7   1  -3   29.30    2.00
   0   2   3 9283.87  196.68
   0   2  -3 9905.91  193.08
   0   2  -3 9092.39  194.28
   0  -2  -3 9458.35  195.08
   0  -2  -3 9397.96  201.48
   1  -2   3   45.40    1.20
  -1   2   3   46.20    1.20
   1   2  -3   46.40    1.30
   1   2  -3   48.30    1.20
   1  -2  -3   46.20    1.20
  -1   2  -3   45.50    1.10
  -1   2  -3   44.90    1.30
   1  -2  -3   43.70    1.40
   1   2   3   44.20    1.30
   2   2  -3  111.49    2.40
  -2   2   3  113.69    2.30
   2  -2   3  104.29    2.50
   2   2  -3  107.69    2.60
   2  -2  -3  119.49    2.90
  -2   2  -3  105.99    2.70
   2   2   3  112.59    2.70
   2  -2  -3  111.39    2.40
  -3   2   3  179.08    3.60
   3  -2   3  175.38    3.90
   3   2  -3  170.48    4.00
   3   2  -3  176.78    3.60
  -3   2  -3  173.78    4.10
   3   2   3  172.98    4.00
   3  -2  -3  170.98    3.70
   4   2  -3  309.77    6.10
   4  -2   3  310.87    6.60
  -4   2   3  306.07    6.10
   4   2  -3  306.77    6.60
   4  -2  -3  305.67    6.30
   4   2   3  313.97    6.60
  -4   2  -3  295.07    6.60
   5   2  -3   24.40    1.60
   5  -2   3   28.90    1.70
   5   2   3   28.00    1.60
  -5   2  -3   29.30    1.70
   5  -2  -3   25.40    1.40
   6  -2   3    0.90    0.80
   6   2  -3   -0.90    0.70
   6  -2  -3   -0.30    0.80
  -6   2  -3   -0.20    0.90
   6   2   3    0.50    0.70
   7   2  -3   10.30    1.50
   7  -2  -3   11.90    1.80
   0   3  -3    1.10    0.30
   0  -3  -3    0.80    0.50
   0   3  -3    1.30    0.40
   0  -3  -3    1.00    0.30
   0   3   3    0.90    0.40
  -1   3   3   42.30    1.20
   1  -3   3   42.80    1.30
   1   3  -3   44.80    1.30
   1   3  -3   40.40    1.20
  -1   3  -3   39.00    1.40
   1  -3  -3   44.20    1.50
   1   3   3   42.10    1.40
  -1   3  -3   45.40    1.10
   1  -3  -3   41.90    1.10
   2   3  -3  325.07    6.20
   2  -3   3  328.07    6.20
   2   3  -3  276.47    5.90
  -2   3   3  319.37    5.90
   2  -3  -3  318.37    6.50
   2  -3  -3  321.17    5.80
  -2   3  -3  308.67    6.30
   2   3   3  309.27    6.30
   3   3  -3  482.85    9.30
   3   3  -3  510.05    9.80
  -3   3   3  508.85    9.30
   3  -3   3  489.65    9.60
   3  -3  -3  505.05    9.20
   3  -3  -3  502.05   10.00
   3   3   3  501.45    9.70
  -3   3  -3  501.95    9.80
   4   3  -3   37.80    1.40
   4   3  -3   34.80    1.70
  -4   3   3   39.30    1.50
   4  -3   3   34.60    1.60
   4   3   3   38.20    1.70
   4  -3  -3   37.70    1.90
  -4   3  -3   30.80    1.70
   4  -3  -3   34.00    1.40
   5   3  -3  190.58    5.00
   5  -3   3  201.68    5.00
   5  -3  -3  186.88    4.80
  -5   3  -3  193.88    5.00
   5   3   3  193.68    4.90
   5  -3  -3  189.38    5.30
   6  -3   3  106.69    3.70
   6   3  -3  106.09    3.60
   6  -3  -3  110.39    4.00
   6   3   3  107.09    3.60
  -6   3  -3  107.29    3.70
   7   3  -3   11.30    1.60
   7  -3  -3   11.10    1.80
   0   4  -3  802.02   14.50
   0   4   3  809.22   14.50
   0   4  -3  811.82   14.20
   0  -4  -3  795.12   14.70
   1   4  -3  188.88    3.90
   1  -4   3  188.68    4.10
   1   4  -3  181.78    3.90
  -1   4   3  178.98    3.90
   1  -4  -3  195.38    4.20
   1  -4  -3  189.88    3.60
   1   4   3  183.68    4.10
  -1   4  -3  192.58    3.50
  -1   4  -3  183.88    4.00
  -2   4   3   41.50    1.40
   2   4  -3   42.80    1.50
   2  -4   3   45.10    1.60
   2   4  -3   41.00    1.40
   2  -4  -3   44.10    1.20
   2  -4  -3   42.60    1.70
   2   4   3   42.10    1.60
  -2   4  -3   42.50    1.60
   3   4  -3  115.99    3.10
   3  -4   3  112.19    3.00
  -3   4   3  118.19    2.80
   3   4  -3  113.09    2.80
   3  -4  -3  112.69    2.50
   3  -4  -3  111.79    3.30
  -3   4  -3  106.99    3.10
   3   4   3  112.89    3.10
  -4   4   3   19.80    1.20
   4   4  -3   20.00    1.20
   4   4  -3   20.70    1.40
   4  -4   3   21.10    1.40
   4  -4  -3   20.10    1.00
   4   4   3   19.30    1.40
   4  -4  -3   21.00    1.60
  -4   4  -3   18.30    1.30
   5  -4   3   23.00    1.70
   5   4  -3   24.20    1.70
   5  -4  -3   22.90    1.90
  -5   4  -3   26.30    1.80
   5   4   3   26.50    1.80
   6  -4   3   40.50    2.30
   6   4  -3   41.30    2.30
   6  -4  -3   35.20    2.50
   6   4   3   39.30    2.20
  -6   4  -3   36.30    2.30
   7   4  -3   14.70    1.90
   7  -4  -3   19.70    2.30
   0  -5  -3  366.76    7.40
   0   5   3  364.56    7.20
   0   5  -3  365.66    7.20
   0   5  -3  368.96    6.80
   1   5  -3  380.16    7.50
   1   5  -3  393.26    7.40
  -1   5   3  383.26    7.50
   1   5   3  377.86    7.60
   1  -5  -3  383.96    7.90
   1  -5  -3  397.06    7.00
  -1   5  -3  391.86    6.90
  -1   5  -3  385.76    7.70
   2   5  -3  289.57    6.00
   2   5  -3  293.87    5.90
   2  -5   3  284.97    6.10
  -2   5   3  287.97    5.90
   2  -5  -3  287.87    6.40
   2  -5  -3  299.17    5.40
   2   5   3  289.47    6.20
  -2   5  -3  293.77    6.20
   3   5  -3  136.69    3.60
  -3   5   3  137.49    3.30
   3   5  -3  131.89    3.30
   3  -5   3  136.09    3.60
   3  -5  -3  135.89    3.80
   3  -5  -3  133.39    2.90
   3   5   3  135.29    3.60
  -3   5  -3  133.09    3.60
   4  -5   3  113.49    3.40
   4   5  -3  110.49    3.10
   4   5  -3  118.29    3.50
  -4   5   3  111.69    3.00
   4  -5  -3  113.29    3.70
   4   5   3  113.59    3.40
  -4   5  -3  111.39    3.40
   5   5  -3    1.60    0.90
   5  -5   3    2.50    0.90
   5  -5  -3    2.40    1.00
   5   5   3    1.50    0.80
  -5   5  -3    2.10    0.90
   6   5  -3   44.70    2.60
   6  -5   3   43.20    2.50
   6   5   3   45.40    2.40
   6  -5  -3   43.10    2.80
  -6   5  -3   44.80    2.50
   7   5  -3   43.20    2.70
   7  -5  -3   47.20    3.10
   0   6  -3  385.16    7.10
   0   6  -3  377.36    7.60
   0   6   3  369.46    7.60
   1   6  -3  400.26    7.50
  -1   6   3  389.96    7.80
   1   6  -3  380.36    7.70
   1  -6  -3  385.46    8.10
  -1   6  -3  397.56    7.00
   1   6   3  383.26    7.90
  -1   6  -3  383.16    7.80
   2   6  -3  226.08    4.90
   2  -6   3  225.28    5.20
   2   6  -3  222.78    5.00
  -2   6   3  226.38    5.00
   2  -6  -3  232.38    4.20
   2  -6  -3  221.38    5.40
  -2   6  -3  225.48    5.20
   2   6   3  223.58    5.20
  -3   6   3  161.78    4.00
   3  -6   3  169.58    4.40
   3   6  -3  172.48    4.10
   3   6  -3  165.78    4.20
   3   6   3  165.08    4.30
   3  -6  -3  157.48    4.50
  -3   6  -3  165.38    4.30
   4   6  -3  325.47    6.90
  -4   6   3  335.07    7.00
   4   6  -3  312.17    7.20
   4  -6   3  322.07    7.30
  -4   6  -3  322.07    7.30
   4  -6  -3  331.67    7.80
   4   6   3  326.67    7.30
   5   6  -3   64.89    2.70
   5  -6   3   58.89    2.70
   5   6   3   59.59    2.60
   5  -6  -3   60.49    2.90
  -5   6  -3   63.49    2.80
   6   6  -3   46.10    2.50
   6   6   3   42.80    2.50
   6  -6  -3   40.90    2.80
  -6   6  -3   41.90    2.40
   7   6  -3   14.20    1.90
   7  -6  -3   19.80    2.50
   0   7   3    8.70    1.10
   0   7  -3    8.80    1.00
   0   7  -3    8.10    0.70
  -1   7   3  373.06    7.70
   1   7  -3  362.36    7.70
   1   7  -3  375.76    7.40
  -1   7  -3  373.16    7.80
   1  -7  -3  374.36    8.10
  -1   7  -3  408.36    7.00
   1   7   3  371.26    7.80
   2  -7   3  103.19    3.20
   2   7  -3  101.19    2.90
   2   7  -3   99.89    2.80
  -2   7   3   99.19    2.90
  -2   7  -3  100.39    3.10
   2   7   3  101.19    3.10
   2  -7  -3  100.19    3.30
   3   7  -3  402.76    8.40
   3  -7   3  412.86    8.70
  -3   7   3  391.66    8.20
   3   7  -3  411.26    8.30
  -3   7  -3  394.66    8.50
   3   7   3  410.56    8.60
   3  -7  -3  382.76    8.80
   4   7  -3  101.39    3.40
  -4   7   3  108.39    3.20
   4   7  -3  105.89    3.20
   4  -7   3  101.79    3.50
   4  -7  -3  106.89    3.80
   4   7   3  111.49    3.50
  -4   7  -3  109.69    3.60
   5   7  -3    9.80    1.40
   5  -7   3   13.90    1.60
   5  -7  -3   11.40    1.70
  -5   7  -3   12.10    1.50
   5   7   3   10.00    1.40
   6   7  -3   49.30    2.70
   6  -7  -3   47.50    3.00
   6   7   3   47.80    2.60
  -6   7  -3   52.99    2.80
   7   7  -3   29.30    3.10
   7  -7  -3   28.90    2.90
   0   8   3  119.69    3.40
   0   8  -3  124.79    2.80
   0   8  -3  118.59    3.40
   1   8  -3  118.49    2.90
  -1   8   3  116.09    3.30
   1   8  -3  114.39    3.30
   1  -8  -3  115.29    3.60
  -1   8  -3  110.89    3.30
   1   8   3  117.39    3.40
   2   8  -3  270.07    5.90
   2  -8   3  271.17    6.40
  -2   8   3  275.67    6.10
   2   8  -3  264.27    6.10
   2  -8  -3  260.87    6.50
   2   8   3  277.17    6.30
  -2   8  -3  270.97    6.30
  -3   8   3    0.80    0.70
   3   8  -3    1.60    0.70
   3   8  -3    0.40    0.80
   3  -8   3    2.00    0.80
   3   8   3    1.00    0.80
   3  -8  -3   -0.90    0.80
  -3   8  -3    0.50    0.80
   4   8  -3  259.27    6.20
   4  -8   3  270.37    6.60
   4   8  -3  262.97    6.40
  -4   8   3  264.37    6.10
   4  -8  -3  258.47    6.90
   4   8   3  254.67    6.40
  -4   8  -3  257.17    6.50
   5  -8   3   20.50    2.00
   5   8  -3   18.20    1.90
   5  -8  -3   20.70    2.20
   5   8   3   20.40    2.00
  -5   8  -3   17.20    1.70
   6   8  -3    4.80    1.20
   6  -8  -3    3.30    1.40
   6   8   3    4.80    1.30
  -6   8  -3    2.30    1.30
   0   9   3  317.07    7.10
   0   9  -3  319.07    7.10
   1   9  -3  129.79    3.30
  -1   9   3  131.49    3.70
   1   9  -3  134.59    3.80
   1   9   3  131.89    3.90
  -1   9  -3  130.59    3.80
   2   9  -3  143.29    4.00
  -2   9   3  137.79    4.00
   2   9  -3  147.59    3.80
  -2   9  -3  147.39    4.20
   2  -9  -3  151.78    4.50
   2   9   3  137.49    4.10
   3   9  -3   46.10    2.20
  -3   9   3   52.09    2.20
   3   9  -3   50.39    2.30
   3  -9   3   47.90    2.40
   3   9   3   48.00    2.40
  -3   9  -3   49.99    2.50
   3  -9  -3   49.30    2.70
   4   9  -3   16.30    1.60
   4   9  -3   17.80    1.60
  -4   9   3   19.80    1.50
   4  -9   3   19.60    1.90
  -4   9  -3   21.70    1.90
   4  -9  -3   13.30    1.80
   4   9   3   21.00    1.90
   5  -9   3   22.50    2.10
   5   9  -3   18.60    1.80
   5   9   3   16.70    1.80
  -5   9  -3   20.00    2.00
   5  -9  -3   17.10    2.10
   6   9  -3   18.70    2.10
   6  -9  -3   17.90    2.30
   6   9   3   16.70    2.00
  -6   9  -3   19.30    2.20
   0  10   3    2.40    0.90
   0  10  -3    3.20    0.90
   1  10  -3  426.86    9.30
  -1  10   3  440.66    9.30
  -1  10  -3  427.86    9.30
   1  10   3  428.66    9.40
   2  10  -3    7.90    1.20
  -2  10   3    5.80    1.10
   2  10  -3    6.70    1.00
  -2  10  -3    6.10    1.10
   2 -10  -3    5.70    1.30
   2  10   3    7.00    1.30
   3  10  -3   39.40    2.10
   3 -10   3   35.80    2.40
   3  10  -3   33.80    2.10
  -3  10   3   38.60    2.00
   3 -10  -3   37.60    2.50
  -3  10  -3   40.60    2.30
   3  10   3   39.00    2.30
   4  10  -3   19.80    1.80
   4  10  -3   21.00    1.80
   4 -10   3   24.80    2.00
  -4  10   3   17.30    1.70
  -4  10  -3   21.60    2.00
   4 -10  -3   19.80    2.20
   4  10   3   19.30    1.90
   5  10  -3   15.60    1.80
   5 -10   3    9.60    1.70
  -5  10  -3   14.60    1.90
   5 -10  -3   13.60    2.00
   5  10   3    9.20    1.70
   6  10  -3   47.40    2.90
   6 -10  -3   52.39    3.40
  -6  10  -3   45.60    3.10
   6  10   3   47.70    3.00
   0  11  -3   82.19    3.10
   0  11   3   81.19    3.10
   1  11  -3   17.90    1.70
  -1  11   3   21.60    1.80
  -1  11  -3   16.90    1.70
   1  11   3   17.30    1.80
   2  11  -3   84.79    3.20
  -2  11   3   85.89    3.20
   2  11  -3   86.19    2.90
   2 -11  -3   86.89    3.70
  -2  11  -3   84.19    3.30
   2  11   3   88.29    3.50
   3  11  -3   11.70    1.50
   3  11  -3   12.60    1.40
  -3  11   3   13.50    1.50
   3 -11  -3   13.80    1.90
  -3  11  -3   12.10    1.60
   3  11   3   13.50    1.70
  -4  11   3   27.00    2.10
   4  11  -3   31.70    2.10
   4  11  -3   27.00    2.20
   4 -11   3   35.20    2.60
  -4  11  -3   33.90    2.30
   4 -11  -3   34.40    2.60
   4  11   3   30.60    2.30
   5 -11   3   81.09    3.80
   5  11  -3   79.19    3.50
  -5  11  -3   75.79    3.50
   5  11   3   79.69    3.70
   5 -11  -3   80.09    4.00
   0  12  -3   22.00    2.00
   0  12   3   22.30    2.00
  -1  12   3   26.10    2.00
   1  12  -3   28.90    2.00
  -1  12  -3   27.70    2.00
   1  12   3   28.50    2.10
   2  12  -3    1.70    1.10
  -2  12   3    1.10    1.00
  -2  12  -3    0.70    1.00
   2  12   3    2.20    1.10
   3  12  -3   65.49    2.70
  -3  12   3   66.99    3.10
   3  12  -3   66.89    3.00
   3 -12  -3   64.09    3.60
  -3  12  -3   67.39    3.20
   3  12   3   65.49    3.20
   4  12  -3   32.00    2.30
  -4  12   3   27.50    2.30
   4  12  -3   28.80    2.10
  -4  12  -3   24.70    2.30
   4  12   3   25.40    2.40
   4 -12  -3   31.50    2.90
   5  12  -3   48.20    3.00
   5 -12   3   50.79    3.30
   5  12   3   48.80    3.00
   5 -12  -3   48.30    3.40
  -5  12  -3   52.39    3.00
   0  13   3   78.19    3.50
   0  13  -3   79.19    3.40
  -1  13   3   17.80    2.00
   1  13  -3   17.40    1.90
   1  13   3   19.10    2.00
  -1  13  -3   18.70    2.00
   2  13  -3   16.90    1.90
  -2  13   3   15.70    1.80
  -2  13  -3   16.70    1.90
   2  13   3   14.70    1.90
  -3  13   3   17.50    2.00
   3  13  -3   15.60    1.90
   3  13   3   18.00    2.10
  -3  13  -3   16.40    2.00
   4  13  -3   27.10    2.40
   4  13   3   23.40    2.40
   4 -13  -3   26.10    2.80
  -4  13  -3   27.20    2.50
   0  14  -3    4.60    1.40
   0  14   3    6.30    1.40
   1  14  -3   72.19    3.40
  -1  14   3   77.79    3.50
   1  14   3   75.39    3.50
  -1  14  -3   66.39    3.40
  -2  14   3   27.40    2.40
   2  14  -3   28.20    2.60
   2  14   3   29.40    2.70
  -2  14  -3   29.30    2.60
  -3  14   3   43.70    2.70
   3  14  -3   46.90    2.90
   3  14   3   41.50    2.90
  -3  14  -3   47.70    3.00
   0  15   3  146.49    5.30
   0  15  -3  148.69    5.30
   1  15  -3    4.10    1.40
  -1  15   3    6.90    1.50
   1  15   3    3.40    1.30
  -1  15  -3    5.90    1.50
   2  15  -3   32.70    2.50
  -2  15   3   21.90    2.30
   0   0  -4 3297.07   57.49
   0   0  -4 3214.28   57.99
  -1   0  -4  183.48    3.80
   1   0  -4  198.18    3.90
  -1   0  -4  192.28    3.90
   2   0  -4  520.15    8.80
   2   0  -4  501.75    9.40
  -2   0  -4  496.95    9.60
  -3   0  -4   70.49    2.30
   3   0  -4   74.69    1.70
   3   0  -4   73.29    2.10
   4   0  -4   22.10    0.90
  -4   0  -4   21.50    1.40
   4   0  -4   20.90    1.20
  -5   0  -4   37.90    2.10
   5   0  -4   40.60    1.90
   6   0  -4   39.10    2.00
   6   0   4   43.60    2.30
   7   0  -4    6.40    1.20
   0  -1  -4    7.10    0.50
   0  -1  -4    7.80    0.60
   0   1  -4    7.70    0.60
   0   1   4    7.70    0.50
   0   1  -4    7.30    0.50
  -1  -1  -4  270.27    5.30
   1   1  -4  268.57    5.30
  -1   1   4  277.67    4.90
  -1  -1  -4  279.47    5.40
   1   1  -4  273.57    4.90
   1  -1   4  270.17    4.90
  -1   1  -4  284.17    5.40
  -1   1  -4  275.97    5.20
   1  -1  -4  270.27    5.20
  -2  -1  -4 1963.80   34.70
  -2   1   4 2050.89   34.60
   2   1  -4 2002.00   35.40
   2   1  -4 1981.40   34.50
   2  -1   4 1931.51   35.20
   2  -1  -4 1960.40   35.00
  -2   1  -4 1950.50   34.60
  -3  -1  -4  544.55   10.60
  -3   1   4  565.14    9.80
   3   1  -4  533.85   10.30
   3   1  -4  552.04    9.80
   3  -1  -4  537.15   10.20
  -3   1  -4  532.45   10.50
   4   1  -4   62.19    1.70
   4   1  -4   63.19    2.20
  -4   1   4   65.09    2.00
  -4   1  -4   61.09    2.30
   4  -1  -4   61.19    2.10
   5   1  -4  412.46    8.60
   5  -1  -4  394.86    8.30
  -5   1  -4  398.06    8.70
   5   1   4  397.66    8.50
   6   1  -4  127.19    3.90
   6   1   4  127.99    3.90
   6  -1  -4  122.79    3.70
  -6   1  -4  122.59    4.10
   7   1  -4   16.00    1.70
   0   2   4  239.58    4.60
   0  -2  -4  246.08    4.70
   0   2  -4  236.18    4.60
   0  -2  -4  239.88    4.60
   0   2  -4  239.18    4.60
   1   2  -4 1005.40   17.80
   1   2  -4 1017.70   17.70
  -1   2   4 1013.40   17.40
   1  -2   4 1006.60   17.50
   1  -2  -4  992.10   17.50
  -1   2  -4 1007.30   17.50
   1   2   4  993.50   17.70
  -1   2  -4  971.50   17.70
   1  -2  -4  998.00   17.80
   2   2  -4    9.50    0.80
   2  -2   4   10.10    0.70
   2   2  -4    9.20    0.50
  -2   2   4    9.40    0.50
   2  -2  -4    9.40    0.70
   2   2   4    8.40    0.80
   2  -2  -4    9.80    0.90
  -2   2  -4    8.40    0.80
  -3   2   4  420.36    7.70
   3   2  -4  426.86    7.70
   3   2  -4  420.16    8.30
   3  -2   4  410.16    8.00
  -3   2  -4  406.46    8.40
   3   2   4  412.46    8.30
   3  -2  -4  422.36    8.00
   4   2  -4  124.19    3.40
   4   2  -4  124.89    2.90
  -4   2   4  131.49    3.20
   4  -2   4  132.29    3.40
   4   2   4  128.39    3.50
   4  -2  -4  130.09    3.20
  -4   2  -4  126.49    3.60
   5   2  -4  138.29    4.00
   5  -2   4  144.59    3.90
  -5   2  -4  137.59    4.10
   5   2   4  136.59    3.90
   5  -2  -4  140.99    3.70
   6   2  -4   62.39    2.70
  -6   2  -4   62.19    2.90
   6   2   4   59.69    2.60
   7   2  -4   48.70    2.60
   7  -2  -4   52.69    3.10
   0  -3  -4   53.79    1.60
   0   3  -4   52.79    1.40
   0  -3  -4   52.19    1.50
   0   3   4   51.59    1.50
   0   3  -4   56.09    1.50
   1   3  -4   19.70    0.90
   1   3  -4   16.80    0.80
  -1   3   4   19.30    0.80
   1   3   4   18.20    0.90
   1  -3  -4   20.00    0.80
  -1   3  -4   20.30    0.70
   1  -3  -4   17.60    1.00
  -1   3  -4   17.70    0.90
  -2   3   4  968.40   16.70
   2   3  -4  946.11   16.80
   2  -3   4  970.70   17.00
   2   3  -4  942.21   17.10
   2  -3  -4  921.91   17.40
   2  -3  -4  983.20   16.80
   2   3   4  922.01   17.20
  -2   3  -4  932.81   17.20
  -3   3   4  264.47    5.10
   3  -3   4  258.77    5.40
   3   3  -4  260.07    5.10
   3   3  -4  252.27    5.60
  -3   3  -4  258.57    5.70
   3  -3  -4  266.07    5.20
   3   3   4  262.67    5.70
   3  -3  -4  255.07    5.90
   4  -3   4   15.20    1.10
   4   3  -4   15.00    0.90
   4   3  -4   16.20    1.20
  -4   3   4   17.40    1.00
   4   3   4   16.30    1.30
   4  -3  -4   17.60    1.60
  -4   3  -4   14.80    1.30
   4  -3  -4   14.50    1.00
   5  -3   4  350.56    7.60
   5   3  -4  349.96    7.70
  -5   3  -4  339.57    7.70
   5  -3  -4  341.67    8.10
   5   3   4  350.46    7.70
   5  -3  -4  332.47    7.20
   6   3  -4   13.70    1.60
  -6   3  -4   11.60    1.50
   6  -3  -4   11.50    1.70
   6   3   4   12.00    1.50
   7   3  -4    9.00    1.50
   7  -3  -4    5.60    1.60
   0   4   4  118.79    2.80
   0  -4  -4  122.19    2.70
   0   4  -4  120.79    2.60
   0  -4  -4  117.29    2.90
   0   4  -4  118.89    2.80
  -1   4   4  100.99    2.40
   1   4  -4  100.39    2.40
   1   4  -4  100.69    2.40
   1   4   4  100.29    2.60
   1  -4  -4   97.09    2.70
  -1   4  -4   97.49    2.60
  -1   4  -4  105.99    2.20
   1  -4  -4  102.39    2.20
   2   4  -4    6.40    0.80
   2  -4   4    8.80    0.80
   2   4  -4    8.40    0.70
  -2   4   4    7.90    0.70
   2  -4  -4    7.70    0.90
   2  -4  -4    8.20    0.60
  -2   4  -4    8.90    0.90
   2   4   4    9.00    0.90
   3   4  -4   87.89    2.60
   3  -4   4   85.59    2.50
  -3   4   4   87.59    2.30
   3   4  -4   89.89    2.30
  -3   4  -4   88.09    2.70
   3  -4  -4   87.29    2.20
   3   4   4   89.49    2.70
   3  -4  -4   83.29    2.80
   4  -4   4   68.09    2.40
   4   4  -4   73.99    2.20
   4   4  -4   69.69    2.50
  -4   4   4   73.59    2.20
   4   4   4   71.79    2.60
   4  -4  -4   69.19    2.80
  -4   4  -4   71.99    2.60
   4  -4  -4   73.89    2.10
   5   4  -4   36.40    2.00
   5  -4   4   35.50    1.90
   5   4   4   36.40    2.10
   5  -4  -4   36.80    2.30
  -5   4  -4   38.90    2.20
   6   4  -4   14.90    1.70
   6   4   4   13.90    1.60
   6  -4  -4   14.00    1.80
  -6   4  -4   13.90    1.70
   7   4  -4  117.99    4.40
   7  -4  -4  115.49    4.70
   0   5  -4    4.10    0.60
   0  -5  -4    3.80    0.70
   0   5  -4    4.00    0.50
   0   5   4    3.40    0.60
   1   5  -4   88.69    2.40
   1   5  -4   90.69    2.30
  -1   5   4   89.09    2.40
   1  -5  -4   86.99    2.70
  -1   5  -4   91.69    2.50
  -1   5  -4   92.89    2.00
   1   5   4   93.99    2.60
   1  -5  -4   87.49    2.10
   2   5  -4  136.99    3.20
  -2   5   4  132.99    3.20
   2   5  -4  129.69    3.30
   2  -5   4  134.69    3.40
   2   5   4  135.29    3.50
   2  -5  -4  138.29    2.80
   2  -5  -4  134.49    3.70
  -2   5  -4  141.19    3.50
  -3   5   4   73.29    2.10
   3   5  -4   73.19    2.10
   3  -5   4   68.69    2.30
   3   5  -4   69.79    2.40
  -3   5  -4   69.79    2.40
   3  -5  -4   69.99    1.80
   3  -5  -4   72.49    2.60
   3   5   4   69.69    2.40
   4   5  -4  265.07    5.70
  -4   5   4  267.27    5.70
   4  -5   4  264.77    6.10
   4   5  -4  257.17    6.10
  -4   5  -4  262.27    6.20
   4  -5  -4  263.17    6.50
   4   5   4  267.77    6.30
   5   5  -4    6.30    1.20
   5  -5   4   10.20    1.30
   5   5   4    9.10    1.30
  -5   5  -4   11.40    1.50
   5  -5  -4    7.40    1.40
   6   5  -4   68.19    3.00
   6   5   4   66.39    3.00
   6  -5  -4   67.59    3.40
  -6   5  -4   72.89    3.20
   7   5  -4   49.30    2.90
   7  -5  -4   47.50    3.20
   0   6  -4   26.10    1.30
   0   6   4   24.50    1.30
   0   6  -4   25.70    1.00
   1   6  -4  100.19    2.70
  -1   6   4  104.29    2.70
   1   6  -4   97.79    2.50
   1   6   4   94.29    2.80
  -1   6  -4  103.79    2.10
  -1   6  -4  100.09    2.80
   2  -6   4  228.98    5.20
   2   6  -4  235.08    5.10
   2   6  -4  238.48    5.10
  -2   6   4  225.68    5.00
   2  -6  -4  219.98    5.50
  -2   6  -4  229.08    5.30
   2   6   4  228.88    5.30
   2  -6  -4  239.58    4.50
   3   6  -4   98.29    2.80
   3   6  -4   94.59    2.90
   3  -6   4   97.19    3.00
  -3   6   4   95.59    2.70
   3   6   4   92.99    3.00
  -3   6  -4   98.59    3.10
   3  -6  -4   96.49    3.30
   4   6  -4   66.09    2.30
   4   6  -4   64.39    2.50
   4  -6   4   62.39    2.50
  -4   6   4   64.69    2.20
   4  -6  -4   58.29    2.70
   4   6   4   66.59    2.60
  -4   6  -4   64.89    2.60
   5   6  -4   49.20    2.40
   5  -6   4   48.10    2.40
   5  -6  -4   48.80    2.80
   5   6   4   43.40    2.40
  -5   6  -4   47.00    2.40
   6   6  -4   25.90    2.20
  -6   6  -4   26.70    2.10
   6  -6  -4   24.80    2.40
   6   6   4   24.70    2.20
   7   6  -4   16.00    2.10
   7  -6  -4   12.90    2.00
   0   7  -4   21.00    1.30
   0   7   4   22.50    1.30
   0   7  -4   22.90    1.00
   1   7  -4   93.39    2.70
   1   7  -4   95.69    2.50
  -1   7   4   95.09    2.80
   1  -7  -4   91.29    3.00
   1   7   4   93.59    2.90
  -1   7  -4   92.19    2.10
  -1   7  -4   87.59    2.80
  -2   7   4  185.58    4.40
   2  -7   4  187.38    4.70
   2   7  -4  192.48    4.40
   2   7  -4  187.28    4.50
   2   7   4  185.98    4.70
  -2   7  -4  196.28    4.80
   2  -7  -4  185.28    4.90
  -3   7   4   90.49    2.70
   3   7  -4   83.59    2.80
   3   7  -4   84.19    2.70
   3  -7   4   85.09    2.90
   3  -7  -4   85.69    3.20
  -3   7  -4   91.29    3.00
   3   7   4   89.59    3.00
   4   7  -4  148.49    4.20
   4  -7   4  142.19    4.20
   4   7  -4  143.49    3.90
  -4   7   4  140.29    3.80
   4  -7  -4  142.69    4.60
  -4   7  -4  145.99    4.30
   4   7   4  146.09    4.30
   5  -7   4   23.80    1.90
   5   7  -4   24.40    2.00
  -5   7  -4   25.80    2.00
   5   7   4   25.10    2.10
   5  -7  -4   25.10    2.30
   6   7  -4   62.79    3.10
   6   7   4   61.59    3.10
   6  -7  -4   64.99    3.60
  -6   7  -4   62.69    3.20
   7  -7  -4    2.20    1.40
   0   8  -4   14.70    1.30
   0   8   4   11.50    1.20
   0   8  -4   13.20    0.90
  -1   8   4  227.78    5.30
   1   8  -4  239.08    5.00
   1   8  -4  226.38    5.30
  -1   8  -4  217.58    5.40
   1   8   4  228.48    5.50
   1  -8  -4  221.58    5.70
   2   8  -4  158.48    4.00
  -2   8   4  157.98    4.10
   2   8  -4  152.18    4.10
   2  -8  -4  148.99    4.50
   2   8   4  163.88    4.40
  -2   8  -4  163.38    4.40
  -3   8   4   51.99    2.10
   3  -8   4   51.29    2.30
   3   8  -4   54.09    2.10
   3   8  -4   52.19    2.20
  -3   8  -4   49.10    2.30
   3  -8  -4   48.50    2.50
   3   8   4   49.80    2.30
   4   8  -4    9.40    1.20
   4  -8   4    9.60    1.40
   4   8  -4    9.40    1.30
  -4   8   4   13.70    1.40
   4   8   4    9.70    1.40
  -4   8  -4   12.40    1.50
   4  -8  -4   12.80    1.70
   5   8  -4   -0.80    0.80
   5  -8   4    0.70    0.90
   5   8   4    1.10    0.90
   5  -8  -4    0.50    1.00
  -5   8  -4    1.10    1.00
   6   8  -4   34.50    2.40
  -6   8  -4   30.40    2.30
   6   8   4   36.20    2.60
   6  -8  -4   36.40    3.20
   0   9   4    2.30    0.80
   0   9  -4    1.50    0.70
   1   9  -4    6.90    0.80
   1   9  -4    8.70    1.10
  -1   9   4    9.20    1.10
   1   9   4    8.00    1.20
   1  -9  -4    9.00    1.40
  -1   9  -4   10.30    1.20
   2   9  -4   42.50    2.10
   2   9  -4   40.50    1.90
  -2   9   4   44.10    2.10
   2   9   4   43.20    2.30
  -2   9  -4   44.30    2.20
   2  -9  -4   41.60    2.40
  -3   9   4    5.10    1.00
   3   9  -4    4.90    1.10
   3  -9   4    4.60    1.10
   3   9  -4    2.90    0.90
  -3   9  -4    3.70    1.10
   3   9   4    3.00    1.00
   3  -9  -4    3.90    1.20
   4   9  -4    7.80    1.30
  -4   9   4    8.50    1.80
   4   9  -4    6.90    1.20
   4  -9   4    5.90    1.30
  -4   9  -4    6.60    1.30
   4  -9  -4    5.70    1.40
   4   9   4    6.80    1.30
   5   9  -4   16.70    1.80
   5  -9   4   18.10    1.90
  -5   9  -4   21.90    2.10
   5  -9  -4   17.70    2.20
   5   9   4   19.40    2.00
   6   9  -4   28.00    2.50
   6   9   4   28.60    2.50
  -6   9  -4   34.70    2.50
   6  -9  -4   28.30    2.80
   0  10   4   90.69    3.20
   0  10  -4   84.29    3.10
   1  10  -4   10.60    1.30
  -1  10   4   11.00    1.30
  -1  10  -4    9.70    1.30
   1  10   4   11.00    1.40
   2  10  -4    8.20    1.20
  -2  10   4    8.60    1.20
   2  10  -4    9.30    1.10
  -2  10  -4    9.70    1.30
   2 -10  -4   13.10    1.80
   2  10   4    9.70    1.50
  -3  10   4    0.90    0.80
   3  10  -4    2.50    0.90
   3  10  -4    1.20    0.80
  -3  10  -4    2.50    1.00
   3  10   4    2.60    1.10
   3 -10  -4    0.10    1.00
   4 -10   4   90.69    3.70
   4  10  -4   95.59    3.40
   4  10  -4   95.39    3.50
  -4  10  -4   93.39    3.70
   4  10   4   92.19    3.70
   4 -10  -4   98.59    4.10
   5  10  -4    9.40    1.60
   5 -10  -4   11.60    1.90
   5  10   4    9.10    1.60
  -5  10  -4   12.20    1.70
   0  11   4   49.99    2.50
   0  11  -4   51.09    2.50
  -1  11   4   70.09    2.90
   1  11  -4   67.69    2.80
   1  11   4   70.59    3.00
  -1  11  -4   78.39    3.00
   2  11  -4   17.70    1.70
  -2  11   4   14.10    1.50
   2  11  -4   14.80    1.50
   2  11   4   13.40    1.60
   2 -11  -4   13.90    1.80
  -2  11  -4   16.50    1.70
   3  11  -4   -1.10    0.70
   3  11  -4    0.70    0.90
  -3  11   4   -0.30    0.70
   3  11   4    0.70    1.00
  -3  11  -4    0.60    1.00
   3 -11  -4   -0.20    1.00
   4  11  -4   37.30    2.20
   4 -11   4   39.30    2.70
   4  11  -4   38.90    2.40
   4 -11  -4   39.00    2.90
   4  11   4   41.60    2.70
  -4  11  -4   39.90    2.50
   5  11  -4    4.10    1.40
  -5  11  -4    6.20    1.50
   5 -11  -4    8.70    1.90
   5  11   4    3.90    1.40
   0  12  -4   56.39    2.70
   0  12   4   54.79    2.70
  -1  12   4   35.10    2.20
   1  12  -4   36.20    2.20
   1  12   4   31.20    2.20
  -1  12  -4   40.30    2.40
   2  12  -4   22.20    2.00
  -2  12   4   22.60    2.00
  -2  12  -4   24.40    2.20
   2  12   4   22.50    2.20
   3  12  -4   27.50    2.10
  -3  12   4   28.30    2.00
   3  12  -4   29.00    2.10
   3 -12  -4   31.10    2.80
  -3  12  -4   31.60    2.40
   3  12   4   27.20    2.40
   4  12  -4    1.70    1.10
   4  12  -4   -0.10    0.80
   4 -12  -4    1.40    1.30
  -4  12  -4    0.90    1.10
   4  12   4    0.80    1.20
   0  13  -4  106.89    4.00
   0  13   4  114.89    4.10
  -1  13   4   18.50    2.00
   1  13  -4   17.10    1.90
  -1  13  -4   16.90    1.90
   1  13   4   18.20    2.00
   2  13  -4   62.69    3.00
  -2  13   4   58.49    3.00
   2  13   4   57.49    3.10
  -2  13  -4   53.99    2.90
   3  13  -4   38.30    2.60
  -3  13   4   32.80    2.30
   3 -13  -4   35.90    3.20
  -3  13  -4   35.30    2.60
   3  13   4   37.00    2.80
   4  13  -4  142.69    5.00
   4  13   4  152.78    5.30
   4 -13  -4  150.48    5.90
  -4  13  -4  152.78    5.30
   0  14   4  125.79    4.50
   0  14  -4  118.49    4.50
  -1  14   4    7.90    1.50
   1  14  -4   10.70    1.60
   1  14   4   10.20    1.70
  -1  14  -4    7.10    1.60
  -2  14   4   16.30    1.90
   2  14  -4   21.80    2.10
  -2  14  -4   20.40    2.20
   2  14   4   21.30    2.40
  -3  14   4   85.19    3.80
   3  14  -4   87.49    3.80
  -3  14  -4   92.19    4.10
   3  14   4   85.69    4.00
   0  15  -4   10.70    1.80
   0  15   4    7.80    1.70
   1  15  -4   35.40    2.60
  -1  15   4   35.80    2.60
   1  15   4   35.10    2.70
  -1  15  -4   34.30    3.00
   0   0  -5    0.30    0.30
   0   0  -5    0.10    0.40
  -1   0  -5  885.51   15.50
   1   0  -5  850.91   15.50
  -1   0  -5  875.01   15.60
   2   0  -5   88.39    2.30
  -2   0  -5   89.79    2.50
  -3   0  -5  113.69    3.20
   3   0  -5  118.69    2.30
   3   0  -5  115.59    3.00
   4   0  -5   13.80    1.20
  -4   0  -5   11.50    1.20
   5   0  -5  129.29    3.60
  -5   0  -5  128.19    4.00
   6   0  -5   99.09    3.30
   7   0   5    2.70    1.10
   7   0  -5    3.70    1.10
   0  -1  -5  610.44   10.90
   0  -1  -5  613.04   10.70
   0   1  -5  611.74   10.80
   0   1   5  603.34   10.80
   0   1  -5  587.04   10.90
   1   1  -5  223.58    4.10
  -1   1   5  229.48    4.10
  -1  -1  -5  221.88    4.60
   1   1  -5  225.08    4.50
  -1  -1  -5  223.08    4.50
  -1   1  -5  224.28    4.40
   1  -1  -5  225.18    4.50
  -1   1  -5  226.08    4.60
   2   1  -5  465.45    7.90
   2  -1   5  452.05    8.10
  -2   1   5  471.85    7.90
  -2  -1  -5  435.86    8.80
   2   1  -5  443.36    8.60
  -2   1  -5  448.06    8.70
   2  -1  -5  445.86    8.50
   3  -1   5  175.18    3.80
   3   1  -5  185.78    3.40
  -3  -1  -5  173.28    4.40
  -3   1   5  184.88    3.40
   3   1  -5  179.88    4.20
   3  -1  -5  179.88    4.00
  -3   1  -5  176.38    4.30
   4   1  -5   49.40    1.90
   4  -1  -5   47.40    1.80
  -4   1  -5   44.30    2.00
   5   1  -5   67.69    2.60
  -5   1  -5   68.39    2.70
   5  -1  -5   65.69    2.40
   5   1   5   63.59    2.50
   6   1  -5  126.69    4.00
   6  -1  -5  128.69    3.90
   6   1   5  128.49    4.00
  -6   1  -5  128.39    4.30
   7   1  -5   13.80    1.60
   7  -1   5   13.60    1.60
   7   1   5    9.10    1.50
   0   2  -5  294.97    5.80
   0  -2  -5  312.17    5.80
   0  -2  -5  319.67    5.90
   0   2  -5  303.37    5.80
   0   2   5  304.27    5.80
  -1  -2  -5  188.68    4.10
   1   2  -5  186.98    4.00
  -1   2   5  200.28    3.70
   1   2  -5  198.08    3.70
  -1   2  -5  194.58    3.90
   1   2   5  200.98    4.10
   1  -2  -5  190.18    3.90
  -1   2  -5  193.98    4.10
   1  -2  -5  188.78    4.10
  -2   2   5  307.27    5.40
   2   2  -5  302.77    5.50
   2  -2   5  293.07    5.60
   2   2  -5  309.47    6.10
   2  -2  -5  294.97    6.20
   2   2   5  300.97    6.10
   2  -2  -5  295.27    5.80
  -2   2  -5  282.77    6.10
  -3   2   5  689.73   12.00
   3   2  -5  680.43   12.00
   3   2  -5  675.43   12.70
   3  -2   5  668.53   12.40
   3  -2  -5  678.03   12.40
   3   2   5  670.43   12.80
  -3   2  -5  658.63   12.80
   4   2  -5   74.49    2.50
   4  -2   5   75.99    2.30
   4  -2  -5   78.69    2.40
  -4   2  -5   76.39    2.70
   4   2   5   74.59    2.60
   5  -2   5  116.59    3.50
   5   2  -5  120.89    3.60
   5  -2  -5  118.19    3.30
   5   2   5  120.89    3.60
  -5   2  -5  119.89    3.80
   6   2  -5    1.50    1.00
   6   2   5    1.90    0.90
  -6   2  -5    2.60    1.10
   7   2  -5   25.60    2.20
   7   2   5   25.40    2.00
  -7   2  -5   28.40    2.40
   7  -2  -5   25.50    2.50
   0   3   5   22.60    1.00
   0   3  -5   21.00    0.90
   0  -3  -5   21.60    1.00
   0  -3  -5   23.20    1.00
   0   3  -5   21.20    0.90
   1   3  -5   59.69    1.70
   1   3  -5   61.39    1.60
  -1   3   5   62.29    1.60
  -1   3  -5   57.99    1.80
  -1   3  -5   62.79    1.60
   1  -3  -5   61.89    1.90
   1   3   5   60.09    1.80
   1  -3  -5   61.39    1.60
   2   3  -5  190.28    4.20
  -2   3   5  194.28    3.80
   2  -3   5  196.08    4.00
   2   3  -5  189.28    3.80
   2  -3  -5  186.38    4.40
  -2   3  -5  186.38    4.30
  -2   3  -5  188.28    3.80
   2   3   5  185.48    4.30
   2  -3  -5  186.28    3.90
  -3   3   5   86.49    2.00
   3   3  -5   81.89    2.50
   3  -3   5   82.69    2.30
   3   3  -5   85.39    2.10
   3  -3  -5   85.59    2.80
   3   3   5   83.19    2.60
   3  -3  -5   85.29    2.20
  -3   3  -5   79.09    2.60
   4   3  -5  183.98    4.70
   4  -3   5  193.78    4.50
   4   3   5  192.58    4.80
   4  -3  -5  193.38    4.30
   4  -3  -5  187.38    5.00
  -4   3  -5  187.48    4.80
   5  -3   5  349.96    8.20
   5   3  -5  357.16    8.00
  -5   3  -5  363.76    8.10
   5  -3  -5  356.76    8.40
   5  -3  -5  360.46    7.50
   5   3   5  354.26    8.00
   6   3  -5    8.90    1.30
  -6   3  -5   12.60    1.60
   6   3   5   11.50    1.50
   6  -3  -5   10.30    1.60
   7   3  -5   24.10    2.30
  -7   3  -5   27.30    2.30
   7  -3  -5   26.20    2.50
   7   3   5   25.30    2.20
   0   4  -5   17.80    1.00
   0  -4  -5   20.10    1.10
   0  -4  -5   16.40    0.90
   0   4  -5   19.20    0.90
   0   4   5   18.20    1.00
  -1   4   5   95.79    2.40
   1   4  -5   98.49    2.50
   1   4  -5   97.09    2.40
   1   4   5   97.29    2.60
  -1   4  -5   93.49    2.20
  -1   4  -5   98.69    2.60
   1  -4  -5  100.59    2.30
   1  -4  -5   97.19    2.70
   2   4  -5    9.50    0.90
   2   4  -5    9.80    0.70
  -2   4   5   10.20    0.70
   2  -4   5   11.70    0.90
   2  -4  -5    8.10    1.00
  -2   4  -5    9.30    0.60
   2  -4  -5    8.80    0.60
  -2   4  -5    8.20    0.90
   2   4   5    9.60    1.00
  -3   4   5  215.98    4.40
   3  -4   5  218.28    4.80
   3   4  -5  213.38    4.50
   3   4  -5  213.58    5.00
   3  -4  -5  210.18    5.20
   3   4   5  213.98    5.00
   3  -4  -5  221.68    4.50
  -3   4  -5  208.88    5.00
   4   4  -5  708.73   13.60
   4  -4   5  709.53   13.40
  -4   4  -5  689.13   13.70
   4   4   5  691.13   13.60
   4  -4  -5  694.63   14.00
   4  -4  -5  690.83   12.90
   5   4  -5   65.29    2.70
   5   4   5   65.19    2.70
  -5   4  -5   57.49    2.60
   5  -4  -5   63.99    2.90
   6   4  -5    6.50    1.30
   6   4   5    6.70    1.30
   6  -4  -5    5.00    1.30
  -6   4  -5    4.80    1.30
   7   4  -5    5.80    1.40
   7  -4  -5    6.10    1.60
   7   4   5    6.60    1.50
  -7   4  -5    8.20    1.70
   0   5  -5  177.58    3.70
   0   5   5  172.68    4.00
   0   5  -5  174.78    4.00
   0  -5  -5  171.58    4.10
  -1   5   5   59.39    1.80
   1   5  -5   59.69    1.80
   1   5  -5   61.09    1.90
   1   5   5   61.79    2.00
  -1   5  -5   60.99    2.00
   1  -5  -5   57.89    2.10
   1  -5  -5   59.19    1.60
  -1   5  -5   60.79    1.50
   2   5  -5   56.99    1.80
   2  -5   5   59.99    2.00
  -2   5   5   57.19    1.80
   2   5  -5   57.69    2.00
   2  -5  -5   51.49    2.20
  -2   5  -5   59.09    1.50
   2  -5  -5   57.39    1.60
   2   5   5   58.89    2.10
  -2   5  -5   58.49    2.10
   3   5  -5   79.69    2.30
  -3   5   5   84.59    2.30
   3   5  -5   78.79    2.60
   3  -5   5   86.39    2.60
   3   5   5   87.09    2.80
   3  -5  -5   81.19    2.10
   3  -5  -5   77.79    2.90
  -3   5  -5   82.89    2.70
   4  -5   5  159.98    4.20
   4   5  -5  155.88    4.30
   4   5   5  166.98    4.50
   4  -5  -5  159.98    4.70
  -4   5  -5  164.58    4.50
   5   5  -5  160.38    4.70
  -5   5  -5  156.38    4.70
   5   5   5  165.38    4.70
   5  -5  -5  163.78    5.00
   6   5  -5    7.80    1.40
   6  -5  -5    9.20    1.60
   6   5   5    8.50    1.40
  -6   5  -5    7.20    1.40
   7   5  -5    3.20    1.30
   7   5   5    4.30    1.30
   7  -5  -5    4.20    1.60
   0   6   5   22.80    1.30
   0   6  -5   21.70    1.20
   0  -6  -5   22.50    1.40
   0   6  -5   23.40    1.00
   1   6  -5  168.08    3.80
  -1   6   5  163.98    3.90
   1   6  -5  164.48    3.90
  -1   6  -5  165.88    3.40
   1  -6  -5  168.08    3.50
   1  -6  -5  165.78    4.30
  -1   6  -5  163.38    4.00
   1   6   5  172.38    4.10
   2   6  -5   42.90    1.70
   2  -6   5   46.50    1.80
   2   6  -5   45.50    1.80
  -2   6   5   46.50    1.70
   2  -6  -5   44.30    2.10
  -2   6  -5   43.00    1.90
   2  -6  -5   47.30    1.40
   2   6   5   42.80    1.90
  -3   6   5  232.88    5.00
   3  -6   5  222.58    5.30
   3   6  -5  229.38    5.30
   3   6  -5  225.08    5.00
   3  -6  -5  218.58    5.70
  -3   6  -5  225.08    5.50
   3   6   5  220.78    5.40
   4  -6   5    8.10    1.10
   4   6  -5    9.30    1.20
  -4   6  -5    8.70    1.20
   4   6   5    7.30    1.20
   4  -6  -5    9.10    1.30
   5   6  -5   38.10    2.20
  -5   6  -5   46.50    2.40
   5  -6  -5   49.00    2.80
   5   6   5   49.60    2.50
   6   6  -5   91.99    3.80
  -6   6  -5   87.19    3.60
   6   6   5   93.29    3.70
   6  -6  -5   90.29    4.10
   7   6  -5  183.98    5.80
   7   6   5  180.68    5.70
   7  -6  -5  187.58    6.50
   0   7  -5   -0.20    0.40
   0   7   5   -0.70    0.60
   0   7  -5    0.30    0.50
  -1   7   5  206.38    4.70
   1   7  -5  205.38    4.80
   1   7  -5  209.78    4.50
   1   7   5  207.68    4.90
  -1   7  -5  204.38    4.90
  -1   7  -5  199.68    4.00
   1  -7  -5  198.38    5.10
   2   7  -5  159.78    4.00
  -2   7   5  151.58    3.90
   2   7  -5  162.78    4.00
   2  -7  -5  159.98    4.40
   2   7   5  158.88    4.20
  -2   7  -5  163.88    4.30
   3   7  -5  216.58    5.20
  -3   7   5  205.78    4.90
   3  -7   5  212.38    5.30
   3   7  -5  217.68    5.00
   3   7   5  216.58    5.40
   3  -7  -5  209.88    5.60
  -3   7  -5  218.08    5.40
   4  -7   5   41.90    2.10
   4   7  -5   43.60    2.20
  -4   7  -5   42.30    2.20
   4  -7  -5   42.50    2.60
   4   7   5   44.60    2.30
   5   7  -5   17.60    1.80
   5  -7  -5   24.10    2.40
  -5   7  -5   16.90    1.80
   5   7   5   18.40    1.90
   6   7  -5   24.80    2.30
   6  -7  -5   27.50    2.80
   6   7   5   27.10    2.40
  -6   7  -5   26.60    2.30
   0   8  -5    8.30    1.00
   0   8  -5    7.90    0.70
   0   8   5    6.50    1.00
   1   8  -5  203.78    4.60
  -1   8   5  212.18    5.00
   1   8  -5  197.28    4.90
   1   8   5  203.08    5.10
   1  -8  -5  208.68    5.40
  -1   8  -5  209.78    5.10
   2   8  -5  249.08    5.60
   2   8  -5  252.07    5.70
  -2   8   5  253.37    5.70
   2   8   5  252.47    6.10
   2  -8  -5  244.18    6.30
  -2   8  -5  249.48    6.00
   3   8  -5   15.10    1.40
   3   8  -5   14.00    1.30
   3  -8   5   14.90    1.50
  -3   8   5   14.20    1.30
  -3   8  -5   16.40    1.60
   3  -8  -5   15.60    1.70
   3   8   5   10.60    1.40
   4  -8   5    9.00    1.40
   4   8  -5    7.70    1.20
   4  -8  -5    9.20    1.60
   4   8   5   11.20    1.60
  -4   8  -5    9.30    1.40
   5   8  -5   31.70    2.20
  -5   8  -5   32.20    2.20
   5  -8  -5   35.10    2.60
   5   8   5   33.60    2.30
   6   8  -5   14.70    1.90
   6  -8  -5   12.80    2.10
  -6   8  -5   15.20    2.00
   6   8   5   13.60    1.90
   0   9  -5   12.70    1.30
   0   9   5   11.40    1.30
   1   9  -5   59.19    2.00
  -1   9   5   53.69    2.30
   1   9  -5   55.59    2.30
   1  -9  -5   54.09    2.60
  -1   9  -5   52.49    2.30
   1   9   5   62.89    2.50
  -2   9   5  243.28    5.80
   2   9  -5  248.78    5.90
   2   9  -5  250.47    5.70
  -2   9  -5  254.07    6.20
   2   9   5  256.37    6.30
   2  -9  -5  250.27    6.60
  -3   9   5  214.38    5.30
   3   9  -5  213.98    5.40
   3   9  -5  223.18    5.40
  -3   9  -5  218.28    5.80
   3   9   5  222.88    5.80
   3  -9  -5  201.38    6.00
   4   9  -5    0.20    0.80
   4  -9   5    0.50    0.90
   4  -9  -5    1.00    1.00
   4   9   5    1.00    1.00
  -4   9  -5    1.80    1.00
   5   9  -5    1.80    1.20
  -5   9  -5   -0.20    1.00
   5   9   5    1.30    1.00
   5  -9  -5    0.30    1.10
   6   9  -5    2.40    1.20
   6   9   5    1.10    1.10
  -6   9  -5    1.70    1.20
   6  -9  -5    3.50    1.50
   0  10   5  159.38    4.50
   0  10  -5  149.79    4.40
   1  10  -5   20.90    1.70
  -1  10   5   22.30    1.80
   1  10   5   24.50    1.80
  -1  10  -5   20.20    1.70
  -2  10   5  118.19    3.70
   2  10  -5  121.69    3.80
   2  10  -5  123.79    3.50
  -2  10  -5  130.49    4.10
   2  10   5  117.19    4.00
   2 -10  -5  123.49    4.30
  -3  10   5   84.19    3.00
   3  10  -5   83.79    3.10
   3  10  -5   87.39    3.10
   3  10   5   88.39    3.40
  -3  10  -5   89.89    3.40
   3 -10  -5   83.39    3.60
   4  10  -5    4.20    1.10
   4 -10   5    5.50    1.30
   4  10   5    6.50    1.40
  -4  10  -5    4.10    1.20
   4 -10  -5    4.30    1.50
   5  10  -5   44.20    2.60
   5 -10  -5   43.40    3.00
  -5  10  -5   44.50    2.90
   5  10   5   39.80    2.60
   0  11   5  254.87    6.40
   0  11  -5  251.67    6.40
  -1  11   5  102.09    3.60
   1  11  -5  105.49    3.60
  -1  11  -5  108.99    3.70
   1  11   5  104.89    3.70
  -2  11   5   24.50    1.80
   2  11  -5   23.20    1.80
   2 -11  -5   21.10    2.20
  -2  11  -5   21.60    2.00
   2  11   5   24.50    2.20
   3  11  -5   51.19    2.50
   3  11  -5   54.29    2.50
  -3  11   5   53.49    2.50
   3  11   5   56.49    2.90
   3 -11  -5   54.59    3.20
  -3  11  -5   49.60    2.70
   4  11  -5   19.30    1.90
   4  11   5   13.80    1.90
   4 -11  -5   17.00    2.20
  -4  11  -5   16.40    1.90
   5  11  -5   74.39    3.50
   5 -11  -5   83.29    4.20
  -5  11  -5   83.69    3.90
   5  11   5   86.29    3.80
   0  12   5    1.50    1.00
   0  12  -5   -0.20    0.90
  -1  12   5   19.50    1.90
   1  12  -5   18.20    1.80
  -1  12  -5   15.80    1.80
   1  12   5   18.80    1.90
   2  12  -5    4.00    1.20
  -2  12   5    3.70    1.00
  -2  12  -5    1.20    1.00
   2  12   5    1.20    1.20
   3  12  -5   37.10    2.40
  -3  12   5   31.10    2.20
   3 -12  -5   32.20    2.60
  -3  12  -5   31.70    2.40
   3  12   5   35.20    2.80
   4  12  -5   36.00    2.30
   4 -12  -5   31.70    3.00
   4  12   5   37.30    2.70
  -4  12  -5   41.80    2.80
   0  13   5    0.70    1.00
   0  13  -5   -0.10    0.90
   1  13  -5   12.80    1.60
  -1  13   5   13.10    1.80
   1  13   5   12.50    1.70
  -1  13  -5   12.50    1.70
   2  13  -5   26.60    2.20
  -2  13   5   26.90    2.10
  -2  13  -5   27.70    2.50
   2  13   5   26.20    2.30
  -3  13   5   34.80    2.40
   3  13  -5   28.60    2.40
  -3  13  -5   37.20    2.90
   3 -13  -5   35.20    2.90
   3  13   5   31.80    2.80
   4 -13  -5    3.50    1.80
  -4  13  -5    1.10    1.30
   4  13   5    0.40    1.30
   0  14  -5    3.40    1.30
   0  14   5    2.70    1.20
   1  14  -5   41.20    2.70
  -1  14   5   47.30    2.90
  -1  14  -5   49.99    3.10
   1  14   5   46.10    2.90
  -2  14   5   36.50    2.50
   2  14  -5   43.90    2.70
   2  14   5   38.40    3.10
  -2  14  -5   40.90    2.80
  -3  14   5   11.70    1.80
   3  14  -5   13.60    1.90
   3  14   5   10.40    2.10
  -3  14  -5   12.90    2.10
   0  15   5   65.49    3.40
   0  15  -5   67.19    3.50
   1  15  -5    2.10    1.30
  -1  15   5    1.50    1.20
  -1  15  -5    2.10    1.30
   1  15   5    2.10    1.40
   0   0  -6   33.90    1.10
   0   0  -6   33.30    1.20
  -1   0  -6 1230.68   21.60
   1   0  -6 1222.58   21.60
  -1   0  -6 1215.18   21.70
   2   0  -6 3476.85   62.39
  -2   0  -6 3406.86   60.69
   3   0  -6   43.60    1.70
   3   0  -6   42.50    0.90
  -3   0  -6   42.80    1.90
   4   0  -6    1.90    0.70
  -4   0  -6    1.30    0.80
   5   0  -6   61.09    2.40
  -5   0  -6   60.49    2.70
   6   0  -6    1.30    0.80
   7   0  -6    5.00    1.20
   7   0   6    2.20    1.00
   0   1   6  856.41   15.20
   0  -1  -6  852.31   15.40
   0   1  -6  856.91   15.20
   0   1  -6  850.51   15.40
   0  -1  -6  888.31   15.10
  -1  -1  -6 1247.28   21.90
   1   1  -6 1214.48   21.90
   1   1  -6 1219.98   21.60
  -1   1   6 1265.27   21.30
  -1  -1  -6 1247.08   22.00
  -1   1  -6 1252.77   21.80
   1  -1  -6 1231.08   21.80
  -1   1  -6 1222.98   21.90
  -2  -1  -6   87.69    2.60
   2  -1   6   90.09    1.90
   2   1  -6   90.19    2.40
   2   1  -6   89.69    1.60
  -2   1  -6   83.69    2.30
   2  -1  -6   88.09    2.30
  -2   1  -6   92.09    2.60
  -3  -1  -6   84.79    2.80
   3   1  -6   85.69    1.70
   3  -1   6   83.09    2.10
   3   1  -6   82.99    2.50
   3  -1  -6   89.79    1.70
  -3   1  -6   85.99    2.70
   3  -1  -6   85.19    2.40
   4  -1   6   46.50    1.70
  -4  -1  -6   47.90    2.20
   4   1  -6   48.10    2.00
   4  -1  -6   48.30    1.80
  -4   1  -6   47.90    2.10
   5   1  -6   26.10    1.60
   5  -1  -6   28.40    1.60
  -5   1  -6   27.40    1.90
   5   1   6   26.20    1.70
   6   1  -6  167.58    4.70
  -6   1  -6  152.68    4.90
   6   1   6  161.78    4.70
   6  -1  -6  163.18    4.50
   7   1  -6   54.19    2.70
   7   1   6   59.49    2.90
   0   2  -6  460.65    8.70
   0  -2  -6  467.05    8.80
   0   2   6  466.45    8.60
   0   2  -6  463.05    8.60
   0  -2  -6  481.25    8.60
   1   2  -6  999.60   18.10
  -1   2   6 1051.69   17.70
   1   2  -6 1034.40   17.70
  -1  -2  -6 1005.30   18.20
   1  -2  -6 1002.40   18.00
   1  -2  -6  984.20   18.20
   1   2   6 1012.00   18.10
  -1   2  -6 1022.30   18.00
  -1   2  -6 1024.00   18.20
   2   2  -6  620.34   10.50
   2   2  -6  585.54   11.20
  -2   2   6  617.54   10.40
   2  -2   6  610.04   10.60
  -2   2  -6  570.54   10.90
  -2   2  -6  577.34   11.20
   2  -2  -6  598.54   11.40
   2   2   6  596.34   11.30
   2  -2  -6  573.54   11.00
  -3   2   6  228.78    4.20
   3   2  -6  218.78    5.00
   3   2  -6  229.38    4.20
   3  -2   6  219.68    4.60
  -3   2  -6  219.48    5.20
   3  -2  -6  220.08    4.80
   3   2   6  218.68    5.10
   4  -2   6  368.56    7.40
   4   2  -6  374.36    7.90
  -4   2  -6  364.26    8.00
   4  -2  -6  371.26    7.50
   4   2   6  367.26    7.90
   5   2  -6  165.58    4.60
   5   2   6  173.58    4.70
   5  -2  -6  167.78    4.30
  -5   2  -6  160.78    4.70
   6   2  -6   30.80    2.00
  -6   2  -6   26.10    2.20
   6   2   6   31.70    2.10
   7   2  -6   49.20    2.60
  -7   2  -6   44.60    2.90
   7  -2  -6   44.00    3.00
   7   2   6   42.80    2.60
   0  -3  -6    2.80    0.50
   0   3  -6    3.10    0.50
   0   3   6    2.40    0.40
   0   3  -6    2.70    0.50
   0  -3  -6    1.50    0.50
  -1   3   6  110.19    2.50
  -1  -3  -6  112.89    2.80
   1   3  -6  111.39    2.50
   1   3  -6  109.59    2.70
  -1   3  -6  113.99    2.60
  -1   3  -6  108.89    2.80
   1  -3  -6  111.39    2.60
   1  -3  -6  111.59    2.80
   1   3   6  111.79    2.80
  -2   3   6  387.46    7.00
   2   3  -6  370.16    7.50
   2   3  -6  390.56    7.00
   2  -3   6  381.26    7.20
  -2   3  -6  372.96    7.20
   2  -3  -6  374.46    7.30
   2  -3  -6  378.56    7.80
  -2   3  -6  374.66    7.60
   2   3   6  383.96    7.70
   3   3  -6  168.98    3.40
  -3   3   6  159.38    3.40
   3  -3   6  163.78    3.70
   3   3  -6  164.98    4.10
   3  -3  -6  167.58    3.80
   3   3   6  167.08    4.20
  -3   3  -6  165.68    4.20
   3  -3  -6  170.38    4.40
   4   3  -6  167.68    4.40
   4  -3   6  165.38    4.00
   4  -3  -6  169.58    4.00
   4  -3  -6  164.08    4.60
   4   3   6  166.48    4.40
  -4   3  -6  163.68    4.40
   5   3  -6  134.29    4.00
  -5   3  -6  132.29    4.10
   5  -3  -6  127.09    4.20
   5  -3  -6  126.29    3.50
   5   3   6  128.09    4.00
   6   3  -6  163.98    4.90
   6  -3  -6  154.78    5.20
   6   3   6  157.18    4.80
  -6   3  -6  162.88    5.00
   7   3  -6   17.20    1.90
   7   3   6   19.00    2.00
  -7   3  -6   18.60    2.00
   7  -3  -6   20.60    2.30
   0  -4  -6   13.50    1.00
   0  -4  -6   13.10    0.90
   0   4  -6   11.30    0.80
   0   4  -6   11.70    0.80
   0   4   6   12.90    0.90
   1   4  -6  133.29    3.20
   1   4  -6  131.49    3.00
  -1   4   6  135.79    3.00
   1   4   6  132.69    3.30
  -1   4  -6  129.99    2.90
   1  -4  -6  137.89    3.10
  -1   4  -6  137.29    3.30
   1  -4  -6  134.79    3.40
   2   4  -6   30.40    1.40
   2  -4   6   29.50    1.20
   2   4  -6   29.10    1.10
  -2   4   6   28.10    1.10
  -2   4  -6   27.10    1.40
   2  -4  -6   30.60    1.20
   2  -4  -6   28.30    1.50
   2   4   6   27.90    1.40
  -2   4  -6   30.90    1.10
   3   4  -6   48.00    1.50
   3  -4   6   47.40    1.70
   3   4  -6   44.20    1.90
  -3   4   6   47.00    1.50
   3  -4  -6   47.00    2.10
   3  -4  -6   50.29    1.60
   3   4   6   48.00    2.00
  -3   4  -6   46.00    2.00
   4  -4   6  556.64   10.90
   4   4  -6  558.74   11.30
   4  -4  -6  567.24   10.70
   4  -4  -6  555.04   11.80
  -4   4  -6  559.44   11.50
   4   4   6  574.94   11.50
   5   4  -6  189.98    5.10
   5  -4  -6  187.08    5.50
  -5   4  -6  181.78    5.20
   5   4   6  189.28    5.20
   6   4  -6    4.50    1.20
   6   4   6    5.10    1.20
   6  -4  -6    2.50    1.20
  -6   4  -6    5.10    1.30
   7   4  -6   52.99    2.90
   7   4   6   53.49    3.00
  -7   4  -6   58.39    3.20
   7  -4  -6   55.49    3.50
   0   5  -6  123.19    3.10
   0  -5  -6  123.99    3.30
   0   5   6  122.09    3.10
   0  -5  -6  125.79    3.00
   0   5  -6  125.29    2.90
   1   5  -6  260.57    5.30
  -1   5   6  250.67    5.20
   1   5  -6  250.97    5.30
  -1   5  -6  252.27    5.50
  -1   5  -6  253.17    5.00
   1   5   6  250.77    5.50
   1  -5  -6  251.97    5.10
   1  -5  -6  261.87    5.70
   2   5  -6   37.00    1.40
  -2   5   6   41.60    1.40
   2   5  -6   38.70    1.60
   2  -5  -6   39.00    1.80
   2   5   6   39.10    1.80
   2  -5  -6   40.70    1.40
  -2   5  -6   41.10    1.30
  -2   5  -6   38.90    1.70
  -3   5   6  136.39    3.20
   3   5  -6  135.79    3.20
   3  -5   6  139.99    3.50
   3   5  -6  131.29    3.60
   3  -5  -6  136.69    4.00
   3  -5  -6  134.09    3.10
  -3   5  -6  125.69    3.70
   3   5   6  134.59    3.80
   4  -5   6  136.99    3.70
   4   5  -6  138.09    4.00
   4  -5  -6  131.19    4.30
  -4   5  -6  132.39    4.00
   4   5   6  142.09    4.10
   5   5  -6   31.70    2.00
  -5   5  -6   33.30    2.10
   5   5   6   32.50    2.10
   5  -5  -6   34.30    2.40
   6   5  -6   30.70    2.20
   6  -5  -6   31.40    2.60
   6   5   6   21.90    2.10
  -6   5  -6   30.50    2.30
   7   5  -6    7.20    1.60
  -7   5  -6    3.40    1.50
   7  -5  -6    4.20    1.50
   7   5   6    5.20    1.40
   0   6  -6   68.49    2.20
   0  -6  -6   74.59    2.50
   0   6  -6   66.49    1.90
   0   6   6   68.09    2.30
   1   6  -6   36.50    1.50
   1   6  -6   35.90    1.40
  -1   6   6   34.80    1.50
  -1   6  -6   35.70    1.20
  -1   6  -6   34.60    1.60
   1  -6  -6   32.00    1.70
   1  -6  -6   36.10    1.30
   1   6   6   34.10    1.60
   2   6  -6   95.49    2.60
   2   6  -6   96.79    2.80
  -2   6   6   93.59    2.60
   2  -6  -6   97.89    2.40
   2   6   6   95.99    3.00
  -2   6  -6   88.99    2.90
   2  -6  -6   97.79    3.10
   3   6  -6  357.86    7.80
   3  -6   6  370.26    7.70
  -3   6   6  372.36    7.40
   3   6  -6  381.36    7.50
   3   6   6  371.66    8.10
  -3   6  -6  361.06    8.00
   3  -6  -6  360.06    8.30
   4  -6   6   12.00    1.30
   4   6  -6   12.40    1.40
   4   6   6   11.00    1.40
   4  -6  -6   11.50    1.50
  -4   6  -6   14.50    1.60
   5   6  -6    4.20    1.10
   5  -6  -6    4.70    1.30
   5   6   6    5.10    1.20
  -5   6  -6    4.20    1.20
   6   6  -6   23.30    2.20
   6   6   6   21.50    2.00
   6  -6  -6   19.00    2.30
  -6   6  -6   19.20    2.10
   7   6  -6   10.50    1.80
   7  -6  -6   12.30    2.10
  -7   6  -6   10.20    1.70
   7   6   6    9.90    1.80
   0   7  -6    4.00    0.80
   0   7  -6    4.40    0.60
   0   7   6    5.10    0.90
   1   7  -6    1.70    0.60
  -1   7   6    2.60    0.70
   1   7  -6    1.70    0.70
  -1   7  -6    2.20    0.70
  -1   7  -6    3.10    0.40
   1  -7  -6    0.30    0.70
   1   7   6    3.10    0.80
   2   7  -6  190.48    4.50
  -2   7   6  193.68    4.50
   2   7  -6  195.98    4.60
  -2   7  -6  188.48    4.80
   2  -7  -6  187.08    5.00
   2   7   6  191.98    4.90
  -3   7   6  100.79    2.90
   3   7  -6  106.09    3.00
   3   7  -6   99.89    3.20
   3  -7   6  103.19    3.20
   3  -7  -6   97.19    3.50
  -3   7  -6   98.39    3.30
   3   7   6  105.39    3.40
   4  -7   6  137.69    4.10
   4   7  -6  138.29    4.20
   4  -7  -6  146.09    4.70
  -4   7  -6  133.19    4.30
   4   7   6  150.48    4.40
   5   7  -6   48.60    2.60
  -5   7  -6   46.10    2.70
   5   7   6   41.70    2.50
   5  -7  -6   49.80    2.90
   6   7  -6    7.90    1.60
  -6   7  -6    9.10    1.70
   6   7   6   10.40    1.70
   6  -7  -6    7.20    1.70
   0   8   6    3.20    0.80
   0   8  -6    2.70    0.80
   0   8  -6    2.00    0.50
   1   8  -6  199.68    4.80
  -1   8   6  192.38    4.80
   1   8  -6  200.28    4.60
   1  -8  -6  200.38    5.30
   1   8   6  200.18    5.00
  -1   8  -6  195.18    4.90
   2   8  -6  106.89    3.20
   2   8  -6  107.89    3.10
  -2   8   6  108.39    3.10
   2  -8  -6  104.79    3.60
  -2   8  -6  106.89    3.40
   2   8   6  111.69    3.50
   3   8  -6  152.68    4.30
  -3   8   6  161.28    4.00
   3   8  -6  156.28    4.10
   3   8   6  157.88    4.60
  -3   8  -6  160.68    4.60
   3  -8  -6  147.29    4.70
   4  -8   6  102.09    3.60
   4   8  -6  113.59    3.70
   4   8   6  111.99    3.80
   4  -8  -6   99.39    4.00
  -4   8  -6  111.09    3.80
   5   8  -6   14.00    1.70
   5  -8  -6   16.10    2.00
   5   8   6   13.70    1.70
  -5   8  -6   14.60    1.80
   6   8  -6   22.90    2.30
  -6   8  -6   19.60    2.20
   6   8   6   27.30    2.40
   6  -8  -6   23.80    2.70
   0   9  -6    1.10    0.80
   0   9   6    0.50    0.70
   1   9  -6   92.79    3.10
  -1   9   6   92.69    3.10
   1   9  -6   94.39    2.70
  -1   9  -6   89.39    3.10
   1   9   6   93.69    3.20
   1  -9  -6   92.59    3.40
   2   9  -6  292.77    6.70
  -2   9   6  293.07    6.60
   2   9  -6  294.37    6.50
   2   9   6  294.07    7.00
  -2   9  -6  289.97    7.00
   2  -9  -6  287.87    7.30
  -3   9   6  133.69    3.80
   3   9  -6  140.79    4.00
   3   9  -6  133.19    3.90
   3   9   6  139.29    4.40
  -3   9  -6  135.59    4.30
   3  -9  -6  131.59    4.50
   4   9  -6   16.20    1.70
   4  -9  -6   17.70    2.10
   4   9   6   23.00    2.10
  -4   9  -6   16.00    1.80
   5   9  -6   31.50    2.40
  -5   9  -6   30.30    2.30
   5  -9  -6   29.10    2.70
   5   9   6   29.90    2.50
   6   9  -6   55.09    3.10
  -6   9  -6   57.99    3.20
   6  -9  -6   56.59    3.50
   6   9   6   54.59    3.20
   0  10   6   10.50    1.40
   0  10  -6   10.30    1.30
   1  10  -6    6.80    1.10
  -1  10   6    8.50    1.20
   1  10   6    6.50    1.20
  -1  10  -6    6.50    1.20
  -2  10   6   20.80    1.50
   2  10  -6   22.20    1.50
   2  10  -6   19.70    1.70
   2  10   6   20.50    1.90
  -2  10  -6   22.30    2.00
   2 -10  -6   20.00    2.00
   3  10  -6   59.29    2.50
   3  10  -6   53.29    2.40
  -3  10   6   56.49    2.40
  -3  10  -6   53.49    2.70
   3  10   6   52.49    2.70
   3 -10  -6   52.59    2.90
   4  10  -6   13.80    1.70
   4 -10  -6   13.50    1.90
  -4  10  -6    9.60    1.60
   4  10   6   12.70    1.80
   5  10  -6    3.70    1.20
   5  10   6    1.90    1.40
   5 -10  -6    3.70    1.60
  -5  10  -6    1.60    1.20
   0  11   6   36.60    2.30
   0  11  -6   31.20    2.00
  -1  11   6   13.30    1.50
   1  11  -6   12.30    1.50
   1  11   6   14.30    1.70
  -1  11  -6   12.10    1.50
   2  11  -6   16.00    1.60
  -2  11   6   12.50    1.50
  -2  11  -6   15.50    1.70
   2 -11  -6   14.90    2.00
   2  11   6   13.70    1.70
   3  11  -6    3.00    1.00
  -3  11   6    4.10    1.00
   3  11  -6    2.70    1.00
  -3  11  -6    1.70    1.10
   3  11   6    2.90    1.20
   3 -11  -6    2.90    1.30
   4  11  -6   55.59    2.80
   4 -11  -6   59.49    3.50
   4  11   6   54.89    3.20
  -4  11  -6   57.89    3.20
   5  11  -6    4.00    1.30
   5 -11  -6    3.50    1.60
  -5  11  -6    4.10    1.40
   5  11   6    1.60    1.40
   0  12  -6   72.89    3.10
   0  12   6   74.69    3.20
  -1  12   6    1.00    1.00
   1  12  -6    0.50    0.90
  -1  12  -6    0.90    1.10
   1  12   6    0.50    1.00
   2  12  -6   16.70    1.70
  -2  12   6   18.10    1.80
  -2  12  -6   19.00    2.00
   2  12   6   16.30    1.90
   3  12  -6   11.80    1.50
  -3  12   6   11.10    1.40
  -3  12  -6   11.40    1.80
   3 -12  -6   12.20    2.10
   3  12   6   14.10    1.90
   4  12  -6   40.10    2.40
   4 -12  -6   37.70    3.10
   4  12   6   36.10    2.70
  -4  12  -6   42.40    2.80
   0  13   6   31.60    2.50
   0  13  -6   29.20    2.20
   1  13  -6   23.10    2.00
  -1  13   6   16.00    1.90
  -1  13  -6   18.40    2.00
   1  13   6   23.50    2.30
   2  13  -6   12.30    1.70
  -2  13   6   10.50    1.60
   2  13   6   12.00    1.90
  -2  13  -6   11.20    1.70
   3  13  -6    3.50    1.10
  -3  13  -6    1.80    1.20
   3  13   6    2.80    1.40
   3 -13  -6    2.40    1.40
   0  14  -6    7.60    1.50
   0  14   6    6.80    1.50
   1  14  -6   28.60    2.50
  -1  14   6   35.60    2.50
  -1  14  -6   33.50    2.80
   1  14   6   29.60    2.60
  -2  14   6   15.00    1.90
   2  14  -6   14.20    1.90
  -2  14  -6   12.50    1.80
   2  14   6   12.10    1.90
   0  15  -6    0.60    1.20
   0  15   6    3.00    1.30
  -1  15   6    5.90    1.60
   1  15  -6    4.00    1.40
  -1   0  -7  799.92   14.80
   1   0  -7  847.52   14.30
   1   0  -7  812.92   14.80
  -1   0  -7  808.12   14.80
   2   0  -7   30.20    1.30
  -2   0  -7   31.10    1.30
   2   0   7   30.20    0.70
  -2   0  -7   30.80    1.50
   3   0  -7 1738.13   30.60
  -3   0  -7 1700.23   30.90
  -4   0  -7   30.40    1.80
   4   0  -7   31.70    1.60
   5   0  -7   15.30    1.40
  -5   0  -7   11.80    1.60
   6   0  -7   24.30    1.80
   7   0  -7   52.19    2.70
   7   0   7   50.79    2.80
   0   1  -7   20.00    1.00
   0   1   7   18.20    0.80
   0   1  -7   18.10    0.80
   0  -1  -7   18.50    1.00
   0  -1  -7   18.70    0.80
  -1  -1  -7  794.72   14.40
  -1   1   7  804.02   13.80
   1   1  -7  799.62   13.80
   1   1  -7  788.42   14.40
  -1  -1  -7  782.72   14.40
  -1   1  -7  778.22   14.30
  -1   1  -7  781.92   14.30
   1  -1  -7  772.22   14.30
   2  -1   7 2231.38   38.90
   2   1  -7 2222.08   39.20
  -2  -1  -7 2290.07   39.50
   2  -1  -7 2227.18   39.10
  -2   1  -7 2210.08   39.10
  -2   1  -7 2247.98   39.40
   3   1  -7  196.28    4.60
  -3  -1  -7  201.88    4.90
   3  -1   7  197.28    4.00
   3  -1  -7  204.08    4.50
  -3   1  -7  190.78    4.80
  -4  -1  -7   68.29    2.70
   4   1  -7   63.69    2.30
   4  -1  -7   66.79    2.30
  -4   1  -7   65.59    2.60
   5   1  -7   93.59    3.10
   5  -1  -7   93.59    3.00
   5   1   7   96.59    3.30
  -5   1  -7   91.59    3.40
   6   1  -7  113.09    3.80
  -6   1  -7  122.29    4.30
   6  -1  -7  117.39    3.70
   6   1   7  112.29    3.90
   7   1  -7   18.50    1.90
   7   1   7   21.90    2.10
   0   2  -7    0.90    0.40
   0   2  -7    0.80    0.40
   0  -2  -7    1.60    0.40
   0  -2  -7    1.20    0.50
   0   2   7    1.00    0.40
   1   2  -7  987.00   17.30
  -1  -2  -7  983.30   17.80
   1   2  -7  990.70   17.80
  -1   2   7 1005.60   17.30
  -1   2  -7  980.10   17.70
   1  -2  -7  982.60   17.80
  -1   2  -7  976.20   17.80
   1  -2  -7  988.10   17.70
   1   2   7  990.40   17.70
   2   2  -7  105.89    2.80
   2   2  -7  107.79    2.10
   2  -2   7  105.09    2.20
  -2   2   7  106.99    2.10
   2  -2  -7   99.19    2.90
   2   2   7  105.29    2.90
  -2   2  -7  105.79    2.60
  -2   2  -7  103.89    2.90
   2  -2  -7  105.69    2.70
   3  -2   7  302.17    5.70
   3   2  -7  289.97    6.30
   3   2   7  287.67    6.40
  -3   2  -7  288.57    6.50
   3  -2  -7  295.57    6.10
   4   2  -7  113.59    3.40
   4   2   7  121.69    3.60
  -4   2  -7  114.69    3.50
   4  -2  -7  110.29    3.10
   5   2  -7   34.40    2.00
   5  -2  -7   35.40    1.80
  -5   2  -7   37.60    2.20
   5   2   7   34.40    2.00
   6   2  -7   96.19    3.50
  -6   2  -7  103.59    3.90
   6   2   7  101.49    3.70
   6  -2  -7   95.99    3.90
   7   2  -7   30.20    2.30
   7  -2  -7   25.80    2.60
  -7   2  -7   25.20    2.30
   7   2   7   25.30    2.20
   0  -3  -7    1.60    0.60
   0  -3  -7    1.20    0.50
   0   3   7    1.80    0.50
   0   3  -7    0.90    0.40
   0   3  -7    1.40    0.50
  -1  -3  -7  247.48    5.30
  -1   3   7  251.17    4.80
   1   3  -7  244.58    4.80
   1   3  -7  252.67    5.20
  -1   3  -7  246.28    5.00
   1  -3  -7  246.38    5.00
   1   3   7  238.58    5.10
   1  -3  -7  241.78    5.20
  -1   3  -7  242.18    5.20
   2   3  -7   67.19    1.70
   2  -3   7   69.49    1.70
   2   3  -7   65.59    2.10
  -2   3   7   68.29    1.60
   2  -3  -7   69.59    2.00
  -2   3  -7   67.69    2.20
   2  -3  -7   63.69    2.30
   2   3   7   64.99    2.20
  -2   3  -7   67.99    1.90
   3  -3   7  154.28    3.40
   3   3  -7  149.59    3.90
   3  -3  -7  154.18    3.60
   3   3   7  153.28    4.00
  -3   3  -7  147.69    4.00
   3  -3  -7  146.39    4.10
   4   3  -7   10.90    1.20
  -4   3  -7   10.60    1.30
   4   3   7   10.80    1.30
   4  -3  -7   11.60    1.00
   4  -3  -7   12.80    1.40
   5   3  -7   94.49    3.30
  -5   3  -7   95.79    3.50
   5  -3  -7   97.09    3.00
   5   3   7  101.39    3.40
   5  -3  -7   99.49    3.70
   6   3  -7   76.39    3.20
  -6   3  -7   74.89    3.40
   6  -3  -7   77.69    3.50
   6   3   7   75.09    3.20
   7   3  -7   15.00    1.80
   7   3   7   14.70    1.80
   7  -3  -7   11.40    1.90
  -7   3  -7   13.50    2.00
   0   4  -7   50.49    1.60
   0   4   7   52.39    1.70
   0  -4  -7   48.00    1.60
   0  -4  -7   51.39    1.80
   0   4  -7   47.80    1.70
  -1   4   7  224.58    4.50
   1   4  -7  219.68    4.70
   1   4  -7  220.78    4.50
  -1   4  -7  217.58    4.50
   1   4   7  212.98    4.80
   1  -4  -7  220.58    4.60
   1  -4  -7  214.68    4.90
  -1   4  -7  216.58    4.80
   2   4  -7   37.80    1.60
   2   4  -7   36.70    1.30
  -2   4   7   38.70    1.30
   2  -4  -7   37.60    1.80
  -2   4  -7   36.30    1.70
  -2   4  -7   39.70    1.40
   2   4   7   34.80    1.70
   2  -4  -7   40.40    1.40
   3   4  -7  155.88    4.10
   3  -4   7  157.28    3.60
   3   4  -7  158.58    3.40
   3  -4  -7  158.18    4.40
  -3   4  -7  153.68    4.20
   3  -4  -7  162.68    3.70
   3   4   7  160.58    4.20
   4   4  -7   69.59    2.60
   4  -4  -7   73.29    2.30
   4  -4  -7   71.89    3.00
   4   4   7   66.59    2.70
  -4   4  -7   68.09    2.70
   5   4  -7   62.49    2.70
  -5   4  -7   61.29    2.90
   5  -4  -7   64.29    3.00
   5   4   7   58.69    2.70
   6   4  -7    5.40    1.20
  -6   4  -7    6.00    1.40
   6   4   7    5.20    1.20
   6  -4  -7    5.30    1.40
   7   4  -7   14.50    1.90
  -7   4  -7   15.50    2.00
   7   4   7   14.70    1.80
   7  -4  -7   16.40    2.30
   0   5  -7   12.50    1.00
   0  -5  -7   10.00    1.00
   0   5   7   12.30    1.00
   0   5  -7   11.00    0.90
   0  -5  -7   12.60    0.90
   1   5  -7  124.89    3.20
   1   5  -7  127.09    3.10
  -1   5   7  129.69    3.10
   1   5   7  126.59    3.30
   1  -5  -7  129.69    3.00
  -1   5  -7  119.59    3.30
  -1   5  -7  127.39    2.90
   1  -5  -7  127.39    3.50
   2   5  -7  126.69    3.00
  -2   5   7  130.29    3.00
   2   5  -7  128.09    3.40
   2  -5  -7  122.99    3.60
   2   5   7  123.89    3.50
  -2   5  -7  122.69    3.50
  -2   5  -7  127.09    2.90
   2  -5  -7  128.09    3.00
   3  -5   7  150.88    3.70
   3   5  -7  153.28    4.00
   3   5  -7  154.58    3.50
  -3   5  -7  145.69    4.10
   3  -5  -7  151.98    3.50
   3   5   7  151.58    4.10
   3  -5  -7  151.18    4.30
   4   5  -7   11.50    1.30
   4  -5  -7   12.80    1.50
  -4   5  -7   13.60    1.50
   4   5   7   13.30    1.50
   5   5  -7   21.80    2.00
   5  -5  -7   21.90    2.10
  -5   5  -7   20.10    1.90
   5   5   7   18.70    1.90
   6   5  -7   10.50    1.60
   6  -5  -7    9.50    1.70
   6   5   7   11.30    1.60
  -6   5  -7    7.60    1.50
   7   5  -7   72.39    3.50
   7   5   7   62.19    3.20
  -7   5  -7   64.09    3.50
   7  -5  -7   66.49    3.70
   0   6  -7   17.10    1.00
   0  -6  -7   18.60    1.30
   0   6   7   22.10    1.30
   0   6  -7   19.80    1.20
   1   6  -7    6.80    0.80
  -1   6   7    7.40    0.90
   1   6  -7    6.70    0.80
  -1   6  -7    6.60    0.60
   1  -6  -7    7.50    1.00
   1   6   7    9.40    1.10
   1  -6  -7    7.30    0.80
  -1   6  -7    6.30    0.90
   2   6  -7    2.50    0.70
   2   6  -7    2.20    0.60
  -2   6   7    1.90    0.60
   2   6   7    2.50    0.80
  -2   6  -7    1.90    0.70
   2  -6  -7    2.60    0.90
   2  -6  -7    2.40    0.50
   3  -6   7  172.08    4.20
   3   6  -7  164.58    4.40
   3   6  -7  168.08    3.90
  -3   6  -7  166.08    4.60
   3  -6  -7  169.98    4.80
   3   6   7  171.38    4.60
   4   6  -7  212.28    5.50
  -4   6  -7  214.58    5.70
   4   6   7  224.58    5.70
   4  -6  -7  213.18    6.00
   5   6  -7   90.09    3.40
   5   6   7   87.19    3.40
  -5   6  -7   80.89    3.40
   5  -6  -7   87.69    3.70
   6   6  -7   12.80    1.70
   6   6   7    8.90    1.50
  -6   6  -7   11.90    1.70
   6  -6  -7   12.90    1.90
  -1   7   7   58.19    2.10
   1   7  -7   63.29    2.10
   1   7  -7   62.89    2.20
  -1   7  -7   62.69    1.80
   1   7   7   62.39    2.30
   1  -7  -7   61.49    2.50
  -1   7  -7   60.49    2.30
   1  -7  -7   61.79    1.90
   2   7  -7  134.99    3.50
   2   7  -7  137.09    3.60
  -2   7   7  131.99    3.40
   2  -7  -7  127.19    4.00
  -2   7  -7  134.69    3.90
   2   7   7  135.49    3.90
   3   7  -7   10.30    1.00
  -3   7   7    9.90    1.10
   3   7  -7    8.20    1.20
   3   7   7   12.30    1.40
  -3   7  -7   12.40    1.40
   3  -7  -7    8.50    1.40
   4   7  -7   44.00    2.30
   4   7   7   46.00    2.40
   4  -7  -7   47.90    2.60
  -4   7  -7   43.20    2.40
   5   7  -7   13.70    1.60
  -5   7  -7   16.30    1.80
   5   7   7   12.00    1.70
   5  -7  -7   11.70    1.80
   6   7  -7   35.70    2.50
   6  -7  -7   33.90    2.80
  -6   7  -7   31.80    2.70
   0   8  -7   73.29    2.60
   0   8   7   74.19    2.60
   0   8  -7   74.79    2.20
  -1   8   7    4.50    0.90
   1   8  -7    5.20    0.90
   1   8  -7    5.70    0.80
  -1   8  -7    6.80    1.10
   1   8   7    6.60    1.10
   1  -8  -7    4.80    1.10
  -2   8   7  231.38    5.40
   2   8  -7  233.78    5.50
   2   8  -7  237.38    5.50
  -2   8  -7  231.98    5.80
   2   8   7  239.58    5.90
   2  -8  -7  233.78    6.10
  -3   8   7   21.60    1.60
   3   8  -7   23.10    1.60
   3   8  -7   22.60    1.40
  -3   8  -7   25.90    1.80
   3   8   7   23.70    2.00
   3  -8  -7   21.40    2.00
   4   8  -7    2.60    1.00
   4  -8  -7    3.80    1.30
   4   8   7    2.70    1.10
  -4   8  -7    1.10    1.00
   5   8  -7   29.30    2.20
   5  -8  -7   30.80    2.50
   5   8   7   32.70    2.30
  -5   8  -7   33.10    2.40
   6   8  -7    2.60    1.20
   6  -8  -7    2.40    1.50
   6   8   7    3.70    1.30
  -6   8  -7    2.70    1.30
   0   9   7   12.90    1.40
   0   9  -7   11.30    1.30
   1   9  -7  179.08    4.70
  -1   9   7  181.28    4.70
   1   9  -7  181.88    4.40
   1  -9  -7  181.48    5.20
   1   9   7  179.68    4.90
  -1   9  -7  179.58    4.90
  -2   9   7   19.20    1.50
   2   9  -7   20.70    1.50
   2   9  -7   18.20    1.50
   2   9   7   19.90    1.80
  -2   9  -7   22.20    1.70
   2  -9  -7   15.40    1.80
   3   9  -7   71.29    2.80
   3   9  -7   77.49    2.80
   3   9   7   78.29    3.20
   3  -9  -7   76.89    3.40
  -3   9  -7   77.89    3.20
   4   9  -7   58.69    2.70
  -4   9  -7   55.79    2.80
   4  -9  -7   55.49    3.20
   4   9   7   49.90    2.70
   5   9  -7    1.80    1.10
  -5   9  -7    0.10    1.10
   5   9   7    2.20    1.20
   5  -9  -7    0.60    1.20
   6   9  -7   34.20    2.90
   6  -9  -7   36.10    3.30
  -6   9  -7   36.80    2.70
   6   9   7   35.40    3.00
   0  10   7   14.90    1.50
   0  10  -7   15.30    1.50
  -1  10   7    1.70    0.90
   1  10  -7    0.90    0.90
  -1  10  -7    3.40    1.00
   1  10   7    2.30    1.00
   1 -10  -7    0.60    1.00
   2  10  -7   71.79    2.60
   2  10  -7   78.79    2.80
  -2  10   7   72.29    2.70
   2 -10  -7   72.69    3.40
  -2  10  -7   72.39    3.00
   2  10   7   74.49    3.10
   3  10  -7   10.50    1.30
   3  10  -7    9.70    1.30
   3  10   7   10.70    1.60
   3 -10  -7    9.60    1.60
  -3  10  -7    8.90    1.50
   4  10  -7    4.70    1.20
   4  10   7    1.50    1.20
   4 -10  -7    3.10    1.30
  -4  10  -7    1.20    1.10
   5  10  -7   21.20    2.10
   5 -10  -7   22.30    2.50
  -5  10  -7   25.40    2.50
   5  10   7   19.90    2.20
   0  11  -7   17.70    1.80
   0  11   7   21.10    1.90
  -1  11   7   14.10    1.60
   1  11  -7   15.90    1.60
   1  11   7   17.10    1.90
  -1  11  -7   14.20    1.60
   2  11  -7    7.40    1.30
  -2  11   7    9.70    1.30
  -2  11  -7    7.10    1.30
   2 -11  -7    7.80    1.60
   2  11   7    8.10    1.60
   3  11  -7   66.79    2.90
   3  11  -7   65.89    2.80
  -3  11  -7   72.09    3.30
   3  11   7   70.39    3.40
   3 -11  -7   66.49    3.50
   4  11  -7   20.40    2.00
   4 -11  -7   28.60    2.80
  -4  11  -7   28.10    2.50
   4  11   7   24.20    2.30
   5  11  -7    9.60    1.70
  -5  11  -7   10.70    1.90
   5 -11  -7   10.50    2.10
   5  11   7   11.90    1.90
   0  12  -7    7.30    1.30
   0  12   7    9.90    1.40
  -1  12   7    2.50    1.00
   1  12  -7    2.70    1.20
  -1  12  -7    1.30    1.00
   1  12   7    2.30    1.10
  -2  12   7   28.80    2.00
   2  12  -7   27.60    2.00
  -2  12  -7   30.50    2.30
   2  12   7   31.30    2.30
   3  12  -7   28.40    2.10
   3 -12  -7   27.80    2.80
   3  12   7   27.20    2.50
  -3  12  -7   28.50    2.50
   4  12  -7   38.10    2.40
   4 -12  -7   41.10    3.10
   4  12   7   49.60    3.10
  -4  12  -7   44.20    2.90
   0  13  -7   32.30    2.40
   0  13   7   35.60    2.40
   1  13  -7   13.70    1.80
  -1  13   7   13.30    1.80
  -1  13  -7   13.70    1.80
   1  13   7   14.20    1.80
  -2  13   7    4.20    1.10
   2  13  -7    4.60    1.20
  -2  13  -7    2.60    1.30
   2  13   7    3.80    1.40
   3  13  -7   15.80    1.80
   3  13   7   14.20    2.10
  -3  13  -7   18.20    2.20
   3 -13  -7   14.00    2.20
   0  14   7    2.90    1.20
   0  14  -7    1.90    1.20
  -1  14   7    8.20    1.50
   1  14  -7    6.50    1.40
   1  14   7    4.10    1.40
  -1  14  -7    5.90    1.50
  -2  14   7    9.30    1.60
   2  14  -7    9.00    1.60
  -2  14  -7    4.60    1.40
   2  14   7   10.70    1.90
   0   0  -8  822.42   15.10
   0   0  -8  829.72   14.80
  -1   0  -8  376.26    7.50
   1   0  -8  388.36    6.90
   1   0  -8  374.16    7.50
  -1   0  -8  377.06    7.50
   2   0  -8  119.19    3.00
  -2   0  -8  108.19    2.90
  -3   0  -8  544.65   10.90
   3   0  -8  537.75   10.60
   4   0  -8   81.19    2.70
  -4   0  -8   74.19    2.90
  -5   0  -8   95.59    3.50
   5   0  -8   87.49    3.00
   6   0  -8   -1.10    0.70
   7   0  -8   28.70    2.10
   7   0   8   22.80    2.10
   0  -1  -8  530.15    9.50
   0   1   8  528.65    9.60
   0  -1  -8  508.75    9.90
   0   1  -8  528.15    9.60
   0   1  -8  519.95    9.90
  -1  -1  -8 1083.29   19.60
  -1   1   8 1121.09   18.90
   1   1  -8 1114.49   19.00
   1   1  -8 1062.49   19.60
  -1  -1  -8 1073.99   19.60
   1  -1  -8 1064.89   19.50
  -1   1  -8 1072.19   19.50
  -1   1  -8 1105.09   19.60
   2   1  -8  306.47    6.30
  -2  -1  -8  303.97    6.50
  -2  -1  -8  295.67    6.30
  -2   1  -8  304.07    6.40
   2  -1  -8  303.17    6.30
  -2   1  -8  300.37    6.20
  -3  -1  -8   25.10    1.60
   3   1  -8   23.30    1.40
   3  -1  -8   27.90    1.40
  -3   1  -8   23.70    1.50
  -4  -1  -8  234.68    5.80
   4   1  -8  224.28    5.40
   4  -1  -8  230.28    5.40
  -4   1  -8  223.18    5.70
   5   1  -8   21.10    1.60
   5  -1  -8   22.00    1.50
  -5   1  -8   20.90    1.90
   5   1   8   19.50    1.70
   6   1  -8   32.00    2.10
   6   1   8   40.20    2.30
   6  -1  -8   34.70    2.10
  -6   1  -8   36.90    2.60
   7   1  -8   42.80    2.60
   7   1   8   35.30    2.50
   0  -2  -8    7.00    0.80
   0  -2  -8    6.90    0.60
   0   2  -8    7.50    0.80
   0   2   8    9.20    0.70
   0   2  -8    7.70    0.70
  -1   2   8  151.58    3.10
   1   2  -8  152.08    3.60
   1   2  -8  150.68    3.10
  -1  -2  -8  153.98    3.60
  -1   2  -8  152.38    3.60
   1   2   8  154.18    3.50
   1  -2  -8  148.99    3.50
  -1   2  -8  146.39    3.50
  -2   2   8  428.56    7.50
   2   2  -8  425.56    7.60
   2   2  -8  414.26    8.40
   2  -2  -8  418.36    8.30
  -2   2  -8  435.36    8.30
   2   2   8  427.26    8.50
   2  -2  -8  426.16    8.60
  -2   2  -8  413.46    8.50
   3   2  -8   25.80    1.50
   3  -2  -8   28.90    1.40
   3   2   8   27.70    1.50
  -3   2  -8   27.80    1.60
   4   2  -8    7.40    1.10
  -4   2  -8    7.20    1.20
   4  -2  -8    6.90    0.90
   4   2   8    8.00    1.10
   5   2  -8   97.69    3.40
   5  -2  -8  103.69    3.20
  -5   2  -8   97.59    3.60
   5   2   8   94.89    3.40
   6   2  -8   10.50    1.50
   6   2   8    9.70    1.50
  -6   2  -8    9.10    1.50
   6  -2  -8   12.00    1.80
   7  -2  -8   49.30    3.10
   7   2   8   52.89    3.00
  -7   2  -8   49.80    3.20
   0   3   8   21.80    1.00
   0   3  -8   23.60    1.10
   0  -3  -8   22.30    1.20
   0   3  -8   24.40    1.10
   0  -3  -8   24.00    1.10
  -1   3   8  626.94   11.20
  -1  -3  -8  630.24   11.80
   1   3  -8  620.44   11.70
   1   3  -8  611.14   11.30
  -1   3  -8  610.34   11.50
   1   3   8  626.34   11.70
   1  -3  -8  624.34   11.60
   1  -3  -8  618.44   11.70
  -1   3  -8  621.34   11.70
   2   3  -8  373.26    6.90
  -2   3   8  378.96    6.90
   2   3  -8  371.16    7.70
  -2   3  -8  380.36    7.40
   2   3   8  365.86    7.70
   2  -3  -8  374.56    7.80
   2  -3  -8  375.26    7.40
  -2   3  -8  380.16    7.80
   3   3  -8   28.10    1.50
   3   3   8   31.90    1.70
  -3   3  -8   30.40    1.70
   3  -3  -8   29.90    1.70
   3  -3  -8   31.10    1.40
   4   3  -8   57.09    2.30
   4  -3  -8   53.99    2.10
  -4   3  -8   51.89    2.40
   4  -3  -8   54.19    2.50
   4   3   8   53.39    2.40
   5   3  -8   23.30    1.80
  -5   3  -8   24.20    2.10
   5  -3  -8   22.20    2.00
   5   3   8   25.50    1.80
   5  -3  -8   20.90    1.50
   6   3  -8  103.79    3.80
  -6   3  -8  101.29    4.00
   6   3   8   98.39    3.70
   6  -3  -8   96.79    4.10
   7   3  -8   32.70    2.40
   7   3   8   25.60    2.30
  -7   3  -8   28.80    2.50
   7  -3  -8   25.80    2.70
   0  -4  -8  224.38    4.90
   0   4  -8  228.78    4.90
   0   4  -8  226.78    4.80
   0   4   8  226.48    4.80
   0  -4  -8  230.18    4.90
  -1   4   8  153.38    3.40
  -1  -4  -8  150.78    3.80
   1   4  -8  149.99    3.40
   1   4  -8  154.58    3.70
   1  -4  -8  156.48    3.90
  -1   4  -8  158.28    3.80
  -1   4  -8  152.58    3.50
   1  -4  -8  152.78    3.60
   1   4   8  153.18    3.80
  -2   4   8   26.00    1.00
   2   4  -8   25.30    1.00
   2   4  -8   25.10    1.40
   2  -4  -8   26.30    1.20
  -2   4  -8   25.70    1.40
   2   4   8   24.20    1.40
   2  -4  -8   25.20    1.50
  -2   4  -8   27.30    1.20
   3   4  -8   79.09    2.70
   3  -4  -8   82.09    2.40
   3  -4  -8   81.99    3.00
  -3   4  -8   86.99    2.90
   3   4   8   83.89    2.80
   4   4  -8  275.37    6.50
   4  -4  -8  277.87    6.90
  -4   4  -8  270.47    6.70
   4  -4  -8  272.17    6.00
   4   4   8  278.67    6.60
   5   4  -8   14.70    1.60
  -5   4  -8   13.10    1.60
   5   4   8   13.30    1.60
   5  -4  -8   10.70    1.60
   6   4  -8   14.00    1.70
  -6   4  -8   16.60    1.90
   6  -4  -8   10.90    1.80
   6   4   8   14.00    1.70
   7   4  -8  141.99    4.90
   7  -4  -8  138.39    5.40
  -7   4  -8  130.09    4.90
   7   4   8  134.29    4.80
   0   5   8    5.00    0.80
   0   5  -8    4.50    0.70
   0  -5  -8    4.30    0.70
   0   5  -8    4.70    0.70
   0  -5  -8    5.70    0.90
   1   5  -8   11.70    1.00
   1   5  -8   12.70    0.90
  -1   5   8   12.50    0.90
   1  -5  -8   14.50    0.90
  -1   5  -8   12.00    0.90
  -1   5  -8   13.30    1.20
   1  -5  -8   13.60    1.30
   1   5   8   13.20    1.20
   2   5  -8  184.58    4.50
   2   5  -8  195.48    4.20
  -2   5   8  195.58    4.10
   2  -5  -8  188.98    4.90
  -2   5  -8  188.38    4.10
  -2   5  -8  188.58    4.70
   2  -5  -8  191.58    4.20
   2   5   8  182.78    4.70
   3   5  -8  613.34   12.10
   3  -5  -8  618.14   11.50
  -3   5  -8  608.74   12.30
   3   5   8  602.04   12.20
   3  -5  -8  604.74   12.50
   4   5  -8   10.90    1.30
  -4   5  -8   12.20    1.50
   4   5   8   16.40    1.60
   4  -5  -8   14.60    1.70
   5   5  -8  156.68    4.80
  -5   5  -8  171.58    5.10
   5   5   8  172.88    5.00
   5  -5  -8  154.38    5.10
   6   5  -8   53.99    2.80
  -6   5  -8   43.90    2.80
   6   5   8   47.40    2.70
   6  -5  -8   50.79    3.10
   7   5  -8    9.70    1.80
   7   5   8    9.20    1.80
   7  -5  -8    7.30    1.80
  -7   5  -8   13.70    2.00
   0  -6  -8   -0.20    0.60
   0   6  -8    0.50    0.50
   0   6   8    0.70    0.60
   0  -6  -8    0.40    0.40
   0   6  -8    0.20    0.50
   1   6  -8   43.10    1.70
   1   6  -8   39.20    1.70
  -1   6   8   40.40    1.70
   1  -6  -8   45.20    1.60
  -1   6  -8   42.40    1.50
   1  -6  -8   40.50    1.90
  -1   6  -8   41.10    1.90
   1   6   8   43.80    1.90
   2   6  -8    9.10    0.90
  -2   6   8    8.10    0.80
   2   6  -8    8.80    1.00
  -2   6  -8    6.40    1.00
   2  -6  -8    8.50    1.20
   2   6   8    7.50    1.10
   2  -6  -8    8.90    0.90
   3   6  -8  374.46    8.10
   3   6   8  365.56    8.30
   3  -6  -8  381.96    8.60
  -3   6  -8  385.96    8.40
   4   6  -8  254.87    6.30
   4   6   8  264.37    6.50
  -4   6  -8  256.17    6.50
   4  -6  -8  244.78    6.70
   5   6  -8   13.30    1.60
   5  -6  -8   10.80    1.70
  -5   6  -8   13.10    1.70
   5   6   8   14.10    1.80
   6   6  -8   13.10    1.80
  -6   6  -8   12.30    1.80
   6  -6  -8   10.40    1.90
   6   6   8   11.90    1.80
   0   7  -8   15.30    1.10
   0   7   8   15.50    1.30
   0   7  -8   13.70    1.20
   0  -7  -8   16.90    1.50
   1   7  -8   28.70    1.50
  -1   7   8   28.40    1.50
   1   7  -8   32.60    1.60
   1  -7  -8   29.00    1.80
  -1   7  -8   30.60    1.70
   1  -7  -8   31.20    1.40
  -1   7  -8   28.40    1.20
   1   7   8   29.40    1.70
  -2   7   8  436.26    8.70
   2   7  -8  436.46    9.00
   2   7  -8  446.56    8.80
   2  -7  -8  436.56    9.50
   2   7   8  428.36    9.30
  -2   7  -8  429.76    9.30
   3   7  -8   21.60    1.60
   3  -7  -8   20.00    1.90
   3   7   8   22.10    1.70
  -3   7  -8   24.10    1.70
   4   7  -8   33.30    2.00
   4   7   8   32.70    2.20
  -4   7  -8   32.10    2.10
   4  -7  -8   32.80    2.30
   5   7  -8   41.50    2.50
  -5   7  -8   38.60    2.60
   5   7   8   43.20    2.60
   5  -7  -8   39.50    2.80
   6   7  -8   13.70    1.90
  -6   7  -8   11.00    1.70
   6   7   8   13.90    2.00
   6  -7  -8   10.70    1.90
   0   8  -8   38.30    1.60
   0   8   8   35.80    1.90
   0   8  -8   36.40    1.90
  -1   8   8   55.29    2.20
   1   8  -8   53.09    2.00
   1   8  -8   57.89    2.20
  -1   8  -8   55.29    2.30
   1   8   8   53.69    2.30
   1  -8  -8   55.89    2.50
   2   8  -8   55.69    2.30
  -2   8   8   58.39    2.20
   2   8  -8   59.39    2.20
  -2   8  -8   57.39    2.50
   2  -8  -8   61.69    2.90
   2   8   8   60.59    2.60
   3   8  -8   87.59    3.20
   3  -8  -8   87.99    3.50
  -3   8  -8   98.49    3.50
   3   8   8   88.19    3.30
   4   8  -8   13.60    1.60
   4   8   8   13.50    1.70
   4  -8  -8   10.60    1.70
  -4   8  -8   13.00    1.70
   5   8  -8   15.50    1.90
  -5   8  -8   14.60    2.00
   5   8   8   15.90    2.00
   5  -8  -8   19.50    2.30
   6   8  -8   11.10    1.80
   6  -8  -8   12.40    2.20
  -6   8  -8   13.30    2.00
   6   8   8   11.40    1.80
   0   9  -8   21.60    1.70
   0   9   8   20.80    1.60
   1   9  -8    2.90    0.80
  -1   9   8    1.70    0.90
   1   9  -8    2.70    0.80
   1   9   8    4.10    1.00
  -1   9  -8    2.60    0.90
   1  -9  -8    4.90    1.30
   2   9  -8   29.00    1.70
   2   9  -8   32.70    1.80
  -2   9   8   30.80    1.70
   2  -9  -8   33.90    2.30
  -2   9  -8   30.40    2.00
   2   9   8   29.30    2.00
   3   9  -8   34.10    2.10
  -3   9  -8   34.80    2.20
   3   9   8   33.20    2.20
   3  -9  -8   30.50    2.30
   4   9  -8    3.10    1.10
  -4   9  -8    4.30    1.30
   4   9   8    3.80    1.30
   4  -9  -8    4.80    1.40
   5   9  -8   43.00    2.60
   5   9   8   37.40    2.60
  -5   9  -8   37.80    2.70
   5  -9  -8   45.40    3.20
   0  10  -8    3.10    1.00
   0  10   8    3.30    1.00
  -1  10   8   12.60    1.50
   1  10  -8   14.30    1.50
  -1  10  -8   16.30    1.70
   1 -10  -8   15.00    1.80
   1  10   8   14.60    1.60
   2  10  -8   84.69    3.00
  -2  10   8   83.39    3.00
   2  10  -8   87.29    3.10
   2  10   8   87.89    3.40
  -2  10  -8   90.29    3.50
   2 -10  -8   81.89    3.60
   3  10  -8   18.20    1.70
  -3  10  -8   19.90    2.00
   3 -10  -8   17.10    2.00
   3  10   8   24.20    2.20
   4  10  -8   23.80    2.00
  -4  10  -8   22.10    2.20
   4  10   8   20.60    2.20
   4 -10  -8   26.50    2.60
   5  10  -8   59.59    3.10
   5 -10  -8   63.89    3.70
  -5  10  -8   67.59    3.60
   5  10   8   61.59    3.30
   0  11  -8    8.00    1.30
   0  11   8    6.70    1.30
  -1  11   8   37.00    2.20
   1  11  -8   36.90    2.10
  -1  11  -8   35.60    2.30
   1  11   8   33.30    2.20
  -2  11   8   13.30    1.50
   2  11  -8   19.60    1.80
   2 -11  -8   15.60    2.00
   2  11   8   13.10    1.70
  -2  11  -8   17.80    1.90
   3  11  -8   30.40    2.00
  -3  11  -8   34.40    2.50
   3 -11  -8   35.30    2.70
   3  11   8   34.20    2.50
   4  11  -8   10.80    1.60
   4 -11  -8   11.80    2.00
   4  11   8   10.50    1.80
  -4  11  -8   12.10    1.80
   5  11  -8    6.50    1.60
   5  11   8    5.50    1.80
  -5  11  -8    9.50    1.90
   0  12   8    0.20    0.90
   0  12  -8   -0.60    0.90
  -1  12   8   27.90    2.10
   1  12  -8   21.20    1.90
  -1  12  -8   21.30    2.10
   1  12   8   19.80    2.10
   2  12  -8   29.20    2.00
  -2  12   8   28.40    2.10
   2  12   8   29.70    2.50
   2 -12  -8   22.50    2.40
  -2  12  -8   26.20    2.30
   3 -12  -8    2.90    1.50
   3  12   8    0.00    1.20
  -3  12  -8    4.60    1.30
   4  12  -8   19.70    2.00
   4 -12  -8   20.20    2.60
   4  12   8   17.30    2.20
  -4  12  -8   19.90    2.30
   0  13  -8    3.00    1.30
   0  13   8    2.00    1.20
  -1  13   8   16.10    1.80
   1  13  -8   15.70    1.80
  -1  13  -8   15.80    1.90
   1  13   8   17.00    2.00
   2  13  -8   19.20    2.00
  -2  13   8   19.10    1.90
   2  13   8   18.20    2.10
  -2  13  -8   17.70    2.10
   3 -13  -8    6.30    1.70
   3  13   8    2.20    1.40
  -3  13  -8    5.30    1.50
   0  14  -8   20.60    2.20
   0  14   8   13.30    1.90
  -1  14   8   13.00    1.80
   1  14  -8   12.70    1.80
  -1  14  -8   13.40    1.90
   1  14   8   11.20    1.80
  -2  14   8   21.90    2.20
   2  14  -8   14.40    1.90
   2  14   8   16.40    2.20
  -2  14  -8   18.10    2.30
   0   0  -9    0.30    0.50
   0   0  -9    0.30    0.40
   1   0  -9    4.60    0.70
  -1   0  -9    3.60    0.70
  -1   0  -9    4.10    0.70
  -2   0  -9    3.20    0.80
  -2   0  -9    4.40    0.90
   2   0  -9    3.70    0.80
  -3   0  -9  406.96    8.60
   3   0  -9  396.86    8.30
   4   0  -9    6.40    1.00
  -4   0  -9    4.90    1.10
   5   0  -9    1.40    0.80
  -5   0  -9    2.20    1.00
   6   0  -9   21.00    1.90
   7   0   9    6.30    1.40
   7   0  -9    3.30    1.20
   0   1   9  359.36    6.90
   0   1  -9  352.76    7.20
   0  -1  -9  375.26    6.80
   0   1  -9  364.76    7.00
   0  -1  -9  358.06    7.30
   1   1  -9  730.33   13.70
  -1   1   9  744.73   13.00
  -1  -1  -9  751.22   13.70
   1   1  -9  735.03   13.10
  -1  -1  -9  730.33   13.70
  -1   1  -9  729.33   13.70
   1  -1  -9  735.83   13.70
  -1   1  -9  735.43   13.70
  -2  -1  -9  375.46    7.90
   2   1  -9  375.76    7.70
  -2  -1  -9  379.76    7.80
  -2   1  -9  376.66    7.60
   2  -1  -9  375.76    7.70
  -2   1  -9  378.66    7.80
   3   1  -9  223.48    5.30
  -3  -1  -9  228.48    5.60
   3  -1  -9  227.68    5.20
  -3   1  -9  236.18    5.60
  -4  -1  -9  169.18    4.90
   4   1  -9  183.38    4.60
   4  -1  -9  179.08    4.50
  -4   1  -9  175.08    4.90
   5   1  -9   86.39    3.10
  -5   1  -9   85.69    3.40
   5  -1  -9   80.69    2.90
   5   1   9   79.99    3.10
   6   1  -9   33.70    2.10
   6   1   9   36.00    2.30
   6  -1  -9   28.70    1.90
  -6   1  -9   31.20    2.40
   7   1  -9   37.90    2.60
   7   1   9   40.90    2.70
   0  -2  -9    9.10    0.90
   0   2  -9    7.90    0.70
   0   2  -9    7.50    0.80
   0  -2  -9    8.60    0.70
   0   2   9    7.40    0.70
   1   2  -9  144.09    3.10
  -1   2   9  149.19    3.10
  -1  -2  -9  139.79    3.60
   1   2  -9  143.69    3.60
   1   2   9  145.19    3.50
  -1   2  -9  143.89    3.50
   1  -2  -9  153.68    3.50
   1  -2  -9  148.39    3.50
  -1   2  -9  142.69    3.50
   2   2  -9   65.39    1.50
  -2   2   9   66.09    1.40
   2  -2  -9   62.89    2.10
   2  -2  -9   66.19    2.30
   2   2   9   59.99    2.20
  -2   2  -9   61.89    2.20
  -2   2  -9   65.99    2.10
   3   2  -9  262.87    6.00
   3  -2  -9  265.77    5.80
   3   2   9  257.37    6.00
   4   2  -9  195.98    5.10
   4   2   9  199.08    5.20
   4  -2  -9  205.38    4.90
  -4   2  -9  194.58    5.30
   5   2  -9    0.70    0.80
   5   2   9    2.80    1.00
  -5   2  -9    1.40    1.00
   5  -2  -9    1.90    0.80
   6   2  -9    9.60    1.50
  -6   2  -9    9.20    1.60
   6  -2  -9    8.10    1.50
   6   2   9   10.10    1.50
   7   2  -9   51.69    2.90
  -7   2  -9   55.69    3.20
   7  -2  -9   50.59    3.20
   7   2   9   51.49    2.90
   0   3  -9  238.38    5.10
   0   3   9  239.78    5.00
   0   3  -9  234.78    5.00
   0  -3  -9  244.98    5.00
   0  -3  -9  235.68    5.20
  -1   3   9   69.99    1.80
   1   3  -9   65.29    1.80
  -1  -3  -9   67.49    2.20
   1   3  -9   64.49    2.20
  -1   3  -9   67.09    2.20
   1  -3  -9   71.39    2.20
   1  -3  -9   66.49    2.10
   1   3   9   66.69    2.20
  -1   3  -9   64.99    2.00
   2   3  -9  465.25    8.40
   2   3  -9  455.75    9.20
  -2   3   9  466.55    8.30
   2  -3  -9  463.55    9.40
  -2   3  -9  445.06    9.20
   2   3   9  461.65    9.30
  -2   3  -9  459.45    8.90
   2  -3  -9  465.85    9.00
   3   3  -9  250.67    5.90
  -3   3  -9  257.47    6.10
   3   3   9  252.67    6.00
   3  -3  -9  261.97    5.70
   3  -3  -9  260.37    6.20
   4   3  -9   22.40    1.60
   4  -3  -9   23.10    1.80
   4  -3  -9   20.60    1.30
   4   3   9   24.30    1.70
  -4   3  -9   24.90    1.80
   5   3  -9   48.50    2.40
   5  -3  -9   50.29    2.20
  -5   3  -9   48.90    2.60
   5  -3  -9   47.60    2.80
   5   3   9   50.99    2.50
   6   3  -9   90.99    3.70
   6  -3  -9   87.09    3.90
   6   3   9  100.29    3.90
  -6   3  -9   95.69    4.00
   7   3   9   87.49    3.80
   7  -3  -9   76.69    4.00
  -7   3  -9   91.69    4.10
   0   4  -9  245.08    5.30
   0   4  -9  243.48    5.30
   0  -4  -9  251.17    5.40
   0  -4  -9  249.88    5.30
   0   4   9  249.38    5.30
  -1   4   9  109.39    2.60
   1   4  -9  106.09    2.60
   1   4  -9  107.89    3.00
  -1  -4  -9  104.69    3.00
   1   4   9  104.99    2.90
  -1   4  -9  101.49    2.90
   1  -4  -9  107.59    3.00
   1  -4  -9  106.59    2.90
  -1   4  -9  108.59    2.80
  -2   4   9  256.87    5.10
   2   4  -9  261.67    5.80
   2   4  -9  265.07    5.20
  -2   4  -9  258.27    5.50
   2   4   9  256.67    5.90
   2  -4  -9  261.57    6.00
   2  -4  -9  258.87    5.60
  -2   4  -9  254.37    5.90
   3   4  -9  218.48    5.40
   3  -4  -9  226.08    5.70
  -3   4  -9  220.38    5.50
   3   4   9  224.58    5.50
   3  -4  -9  226.78    5.10
   4   4  -9   21.90    1.60
  -4   4  -9   25.30    1.90
   4  -4  -9   23.00    1.40
   4  -4  -9   22.50    1.80
   4   4   9   23.20    1.90
   5   4  -9    1.20    0.90
   5  -4  -9    3.70    1.30
  -5   4  -9    3.90    1.10
   5   4   9    0.70    1.00
   6   4  -9   21.40    2.10
   6   4   9   20.60    2.10
   6  -4  -9   21.30    2.40
  -6   4  -9   20.50    2.10
   7   4  -9   17.10    2.10
   7  -4  -9   15.10    2.30
   7   4   9   17.10    2.00
  -7   4  -9   19.40    2.30
   0   5   9    1.30    0.60
   0   5  -9    0.40    0.50
   0  -5  -9    0.70    0.50
   0  -5  -9    0.00    0.60
   0   5  -9    0.20    0.50
   1   5  -9   75.09    2.40
  -1   5   9   76.79    2.20
   1   5  -9   73.19    2.20
  -1   5  -9   77.69    2.20
   1   5   9   74.99    2.50
   1  -5  -9   74.99    2.30
  -1   5  -9   82.09    2.50
   1  -5  -9   73.49    2.60
   2   5  -9  503.95   10.20
   2   5  -9  524.75    9.70
  -2   5   9  511.45    9.50
   2  -5  -9  511.85    9.90
   2   5   9  507.05   10.30
  -2   5  -9  502.55    9.70
  -2   5  -9  499.35   10.30
   2  -5  -9  501.35   10.40
   3   5  -9  120.19    3.50
   3   5   9  113.49    3.60
   3  -5  -9  109.39    3.00
   3  -5  -9  113.69    3.70
  -3   5  -9  117.79    3.70
   4   5  -9   65.19    2.70
  -4   5  -9   63.29    2.80
   4   5   9   61.09    2.70
   4  -5  -9   62.49    2.90
   5   5  -9   10.50    1.50
   5   5   9    7.70    1.40
   5  -5  -9   12.90    1.90
  -5   5  -9   13.00    1.70
   6   5  -9   18.40    2.00
   6   5   9   14.20    1.80
  -6   5  -9   19.20    2.10
   6  -5  -9   21.60    2.40
   0  -6  -9  219.18    5.20
   0  -6  -9  214.28    4.90
   0   6  -9  211.18    5.00
   0   6   9  220.98    5.00
   0   6  -9  214.98    4.80
  -1   6   9   26.50    1.40
   1   6  -9   29.60    1.40
   1   6  -9   26.50    1.50
  -1   6  -9   26.00    1.20
   1   6   9   26.60    1.60
   1  -6  -9   27.60    1.30
   1  -6  -9   27.80    1.60
  -1   6  -9   28.40    1.60
   2   6  -9  135.19    3.40
   2   6  -9  137.39    3.80
  -2   6   9  137.29    3.30
   2  -6  -9  138.89    3.40
  -2   6  -9  133.79    3.90
   2   6   9  130.89    3.90
   2  -6  -9  135.99    4.10
   3   6  -9  194.08    5.00
   3   6   9  202.28    5.20
   3  -6  -9  192.38    5.40
  -3   6  -9  194.88    5.20
   4   6  -9    3.10    1.00
  -4   6  -9    1.90    1.00
   4  -6  -9    2.80    1.10
   4   6   9    3.50    1.10
   5   6  -9   25.40    2.10
  -5   6  -9   28.80    2.20
   5   6   9   24.60    2.20
   5  -6  -9   22.60    2.30
   6   6  -9   12.10    1.80
  -6   6  -9   14.50    2.00
   6   6   9   15.70    2.00
   6  -6  -9   12.20    2.00
   0   7  -9    6.60    1.00
   0  -7  -9    6.20    1.10
   0   7  -9    7.60    0.90
   0   7   9    6.80    1.00
   1   7  -9   43.20    1.80
   1   7  -9   40.10    1.80
  -1   7   9   43.00    1.90
  -1   7  -9   44.30    1.60
   1   7   9   43.40    2.00
  -1   7  -9   41.50    2.00
   1  -7  -9   43.40    1.70
   1  -7  -9   41.10    2.10
  -2   7   9  180.88    4.30
   2   7  -9  187.38    4.40
   2   7  -9  185.88    4.70
   2  -7  -9  180.48    5.10
  -2   7  -9  182.88    4.90
   2   7   9  186.48    4.90
   3   7  -9   10.80    1.30
   3  -7  -9   11.40    1.50
   3   7   9   12.50    1.50
  -3   7  -9   11.80    1.50
   4   7  -9   25.00    1.80
  -4   7  -9   22.60    2.10
   4  -7  -9   21.60    2.10
   4   7   9   24.20    2.20
   5   7  -9   57.59    2.90
   5   7   9   54.99    2.90
   5  -7  -9   57.19    3.40
  -5   7  -9   55.79    3.00
   6   7  -9    8.50    1.70
   6  -7  -9    6.90    1.80
   6   7   9    7.70    1.60
  -6   7  -9    6.90    1.60
   0   8  -9   78.39    2.80
   0   8   9   86.09    2.90
   0   8  -9   81.99    2.50
  -1   8   9   76.99    2.60
   1   8  -9   75.19    2.50
   1   8  -9   77.09    2.60
   1  -8  -9   75.39    3.00
  -1   8  -9   75.19    2.90
   1   8   9   72.19    2.80
   1  -8  -9   77.99    2.70
  -2   8   9  107.29    3.10
   2   8  -9  103.69    3.30
   2   8  -9  109.99    3.20
  -2   8  -9  107.19    3.60
   2   8   9   96.09    3.50
   2  -8  -9  107.39    3.80
   3   8  -9   18.90    1.70
   3  -8  -9   24.80    2.20
   3   8   9   19.70    1.90
  -3   8  -9   18.60    1.80
   4   8  -9   29.20    2.10
  -4   8  -9   28.10    2.20
   4  -8  -9   32.30    2.50
   4   8   9   26.70    2.30
   5   8  -9    8.50    1.60
   5   8   9    5.50    1.40
   5  -8  -9    5.50    1.60
  -5   8  -9    7.40    1.50
   6   8  -9   32.90    2.80
   6  -8  -9   31.00    3.10
  -6   8  -9   32.50    2.90
   6   8   9   32.80    2.90
   0   9  -9   31.40    1.80
   0   9   9   32.40    1.90
  -1   9   9  142.49    4.10
   1   9  -9  151.18    4.00
   1   9  -9  140.69    4.10
   1  -9  -9  145.69    4.60
   1   9   9  147.69    4.40
  -1   9  -9  150.78    4.40
   2   9  -9    8.50    1.20
   2   9  -9    7.00    1.10
  -2   9   9    9.60    1.20
  -2   9  -9    6.10    1.20
   2   9   9    8.10    1.30
   2  -9  -9    8.80    1.50
   3   9  -9   67.29    2.90
   3   9   9   64.59    3.00
   3  -9  -9   67.49    3.30
  -3   9  -9   70.39    3.10
   4   9  -9   55.09    2.70
   4   9   9   53.79    2.90
   4  -9  -9   51.19    3.20
  -4   9  -9   53.39    3.00
   5   9  -9   55.89    3.00
  -5   9  -9   58.99    3.30
   5  -9  -9   67.09    3.60
   5   9   9   59.29    3.20
   0  10   9  363.36    8.40
   0  10  -9  369.56    8.30
  -1  10   9  116.39    3.70
   1  10  -9  113.69    3.70
   1 -10  -9  114.59    4.20
   1  10   9  115.59    3.90
  -1  10  -9  120.69    4.00
   2  10  -9   99.39    3.30
  -2  10   9   99.99    3.30
   2  10  -9  103.09    3.40
  -2  10  -9  100.59    3.80
   2  10   9  106.79    3.80
   2 -10  -9  102.09    4.00
   3  10  -9   17.50    1.70
  -3  10  -9   15.60    1.90
   3  10   9   16.90    1.90
   3 -10  -9   16.70    2.00
   4  10  -9  101.39    3.90
  -4  10  -9  100.59    4.10
   4 -10  -9   94.49    4.30
   4  10   9  102.09    4.10
   5  10  -9    6.10    1.60
   5  10   9    7.70    1.70
   5 -10  -9    5.60    1.70
  -5  10  -9    7.00    1.70
   0  11  -9    2.30    1.00
   0  11   9    1.70    1.00
  -1  11   9    1.70    0.90
   1  11  -9    2.90    1.00
   1  11   9    3.60    1.30
  -1  11  -9    3.90    1.30
   2  11  -9   87.19    3.20
  -2  11   9   86.59    3.10
   2 -11  -9   83.89    3.90
  -2  11  -9   87.49    3.60
   2  11   9   90.39    3.70
   3  11  -9    6.10    1.30
   3  11   9    5.40    1.40
   3 -11  -9    7.30    1.60
  -3  11  -9    6.30    1.60
   4  11  -9   12.60    1.80
   4 -11  -9    6.50    1.60
  -4  11  -9    9.10    1.80
   4  11   9   10.60    1.80
   0  12   9    8.60    1.50
   0  12  -9   13.20    1.60
  -1  12   9   10.90    1.50
   1  12  -9    8.70    1.40
  -1  12  -9    8.50    1.50
   1  12   9    9.70    1.70
   2  12  -9   42.30    2.50
  -2  12   9   43.20    2.50
   2  12   9   48.60    3.00
  -2  12  -9   41.70    2.70
   2 -12  -9   51.29    3.30
  -3  12  -9   49.99    3.00
   3  12   9   48.40    3.00
   3 -12  -9   50.39    3.20
   4  12  -9   61.99    3.20
  -4  12  -9   46.50    3.30
   4 -12  -9   53.79    3.60
   4  12   9   53.69    3.40
   0  13  -9   29.80    2.50
   0  13   9   24.50    2.30
  -1  13   9   54.59    2.80
   1  13  -9   55.09    3.00
  -1  13  -9   54.09    3.00
   1  13   9   58.29    3.10
   2  13  -9    4.50    1.30
  -2  13  -9    4.10    1.40
   2  13   9    3.30    1.40
   3  13   9    1.50    1.30
  -3  13  -9    0.20    1.10
   3 -13  -9    1.10    1.40
   0  14   9   16.60    2.00
   0  14  -9   17.20    2.10
   1  14  -9   60.09    3.10
  -1  14   9   58.29    3.10
  -1  14  -9   60.69    3.40
   1  14   9   64.19    3.40
   0   0 -10  488.25    9.60
   0   0 -10  500.25    9.30
   1   0 -10  339.77    7.10
  -1   0 -10  353.66    7.10
  -1   0 -10  346.67    7.20
  -2   0 -10  108.09    3.10
   2   0 -10  104.69    3.00
  -2   0 -10  101.89    3.00
   3   0 -10    2.80    0.80
  -3   0 -10    1.70    0.80
  -4   0 -10    3.90    1.10
   4   0 -10    1.80    0.80
  -5   0 -10   52.09    2.70
   5   0 -10   46.90    2.40
   6   0 -10   71.49    3.10
   7   0  10    3.20    1.20
   7   0 -10    3.50    1.30
   0   1  10  140.19    3.20
   0   1 -10  144.39    3.60
   0  -1 -10  148.09    3.10
   0  -1 -10  142.39    3.60
   0   1 -10  143.19    3.30
   1   1 -10  190.18    4.40
   1   1 -10  186.58    3.80
  -1  -1 -10  186.38    4.40
  -1   1  10  191.98    3.80
  -1  -1 -10  191.38    4.50
  -1   1 -10  190.18    4.40
  -1   1 -10  191.68    4.40
   1  -1 -10  191.28    4.20
   1  -1 -10  183.68    4.40
   2   1 -10  413.06    8.30
  -2  -1 -10  396.26    8.40
  -2  -1 -10  410.56    8.40
   2  -1 -10  396.06    8.20
  -2   1 -10  400.46    8.40
  -2   1 -10  414.26    8.30
  -3  -1 -10  247.38    6.00
   3   1 -10  249.18    5.70
  -3   1 -10  250.07    6.00
   3  -1 -10  243.08    5.60
   4   1 -10  174.68    4.60
   4  -1 -10  169.18    4.50
  -4   1 -10  173.48    4.90
   5   1 -10    5.30    1.20
   5  -1 -10    6.00    1.10
   5   1  10    7.20    1.20
  -5   1 -10    5.10    1.30
   6   1 -10   36.70    2.30
  -6   1 -10   41.40    2.70
   6   1  10   36.20    2.40
   6  -1 -10   40.40    2.20
   7   1 -10   79.59    3.50
   7   1  10   75.39    3.50
   0  -2 -10   17.10    1.20
   0   2  10   17.70    1.00
   0  -2 -10   16.50    0.90
   0   2 -10   15.60    1.10
   0   2 -10   16.60    1.00
   1   2 -10  669.43   12.30
  -1  -2 -10  673.13   12.90
  -1   2  10  684.63   12.20
   1   2 -10  681.03   12.90
  -1   2 -10  682.23   12.90
   1  -2 -10  681.43   12.90
  -1   2 -10  673.93   12.80
   1  -2 -10  693.63   12.80
   1   2  10  682.43   12.80
  -2  -2 -10   49.50    2.00
   2   2 -10   52.69    2.00
   2  -2 -10   51.49    2.00
  -2   2 -10   50.09    1.90
   2  -2 -10   54.49    2.10
  -2   2 -10   52.19    2.10
   2   2  10   47.70    2.00
   3   2 -10   58.99    2.30
  -3   2 -10   50.09    2.20
   3  -2 -10   53.79    2.30
   3  -2 -10   49.90    2.00
   3   2  10   50.29    2.20
   4   2 -10  317.17    7.30
  -4   2 -10  316.87    7.50
   4  -2 -10  308.97    6.90
   4   2  10  315.17    7.30
   5   2 -10   14.70    1.60
  -5   2 -10   14.10    1.70
   5  -2 -10   13.20    1.40
   5   2  10   14.10    1.60
   6   2 -10   21.10    2.00
  -6   2 -10   20.20    2.10
   6   2  10   22.10    2.10
   6  -2 -10   21.80    2.30
   7   2 -10   -0.60    1.10
   7  -2 -10   -0.10    1.30
  -7   2 -10    0.60    1.30
   7   2  10    1.90    1.30
   0   3  10    0.30    0.50
   0   3 -10    0.50    0.40
   0  -3 -10    0.80    0.50
   0  -3 -10    0.40    0.60
   0   3 -10    1.00    0.60
  -1   3  10   22.00    1.00
   1   3 -10   21.60    1.30
  -1  -3 -10   22.80    1.40
   1   3 -10   22.10    1.00
   1  -3 -10   22.70    1.30
   1   3  10   21.40    1.30
  -1   3 -10   21.60    1.20
   1  -3 -10   20.20    1.20
  -1   3 -10   21.50    1.30
   2   3 -10  257.87    5.90
   2   3  10  256.87    5.80
  -2   3 -10  259.37    5.90
  -2   3 -10  256.27    5.60
   2  -3 -10  259.87    5.70
   2  -3 -10  262.27    5.90
   3   3  10  233.58    5.70
   3  -3 -10  237.98    5.40
  -3   3 -10  236.28    5.80
   3  -3 -10  233.28    5.80
   4   3 -10    3.50    0.90
   4  -3 -10    2.80    0.80
  -4   3 -10    3.60    1.00
   4   3  10    2.50    0.90
   4  -3 -10    3.30    1.00
   5   3 -10   57.99    2.70
  -5   3 -10   59.99    3.00
   5  -3 -10   51.29    2.80
   5   3  10   48.80    2.60
   5  -3 -10   56.99    2.40
   6   3 -10    5.20    1.40
   6   3  10    5.40    1.30
   6  -3 -10    3.40    1.30
  -6   3 -10    5.30    1.40
   7   3 -10   28.90    2.60
   7   3  10   24.10    2.40
  -7   3 -10   25.00    2.60
   7  -3 -10   26.00    3.20
   0  -4 -10   23.20    1.40
   0   4 -10   21.20    1.10
   0   4 -10   20.60    1.30
   0  -4 -10   21.30    1.30
   0   4  10   23.40    1.20
   1   4 -10  121.69    3.30
   1   4 -10  116.29    2.90
  -1   4  10  120.89    2.90
  -1  -4 -10  117.79    3.30
  -1   4 -10  120.49    3.10
   1  -4 -10  117.39    3.20
   1  -4 -10  118.59    3.30
  -1   4 -10  116.59    3.30
   1   4  10  120.99    3.20
   2   4 -10  159.98    3.50
   2   4 -10  155.88    4.10
  -2   4 -10  158.98    3.80
   2  -4 -10  162.48    4.30
   2  -4 -10  160.58    4.00
  -2   4 -10  166.28    4.30
   2   4  10  163.58    4.20
   3   4 -10  478.65   10.10
   3   4  10  497.05   10.20
   3  -4 -10  496.15    9.80
   3  -4 -10  489.15   10.40
  -3   4 -10  480.15   10.20
   4   4 -10   52.09    2.40
  -4   4 -10   51.89    2.50
   4  -4 -10   51.29    2.60
   4   4  10   54.59    2.50
   4  -4 -10   51.99    2.10
   5   4 -10   54.29    2.70
   5   4  10   47.80    2.60
  -5   4 -10   48.90    2.80
   5  -4 -10   54.09    2.90
   6   4 -10   34.90    2.40
   6   4  10   36.50    2.50
   6  -4 -10   36.90    2.70
  -6   4 -10   38.20    2.80
   0   5 -10   -0.20    0.40
   0   5  10    0.10    0.50
   0   5 -10    0.00    0.50
   0  -5 -10    0.10    0.60
   0  -5 -10   -0.60    0.50
   1   5 -10  152.88    3.60
  -1   5  10  150.38    3.60
  -1  -5 -10  151.08    4.00
   1   5 -10  154.78    3.90
   1  -5 -10  152.58    4.10
  -1   5 -10  153.48    3.70
  -1   5 -10  155.98    4.00
   1   5  10  159.28    4.00
   1  -5 -10  149.79    3.80
   2   5 -10  417.76    8.10
   2   5 -10  416.66    8.70
  -2   5 -10  406.46    8.80
  -2   5 -10  418.16    8.20
   2  -5 -10  416.36    9.00
   2  -5 -10  424.56    8.40
   2   5  10  416.26    8.80
   3   5 -10    9.60    1.20
   3  -5 -10    9.20    1.00
   3   5  10   11.30    1.40
  -3   5 -10    9.70    1.30
   3  -5 -10    9.00    1.40
   4   5 -10   55.39    2.50
   4  -5 -10   55.79    2.80
  -4   5 -10   53.99    2.70
   4   5  10   57.09    2.70
   5   5 -10   47.60    2.60
   5  -5 -10   47.40    2.80
  -5   5 -10   40.00    2.60
   5   5  10   46.10    2.60
   6   5 -10  115.29    4.40
  -6   5 -10  110.09    4.40
   6   5  10  112.09    4.30
   6  -5 -10  117.69    4.70
   0  -6 -10  170.88    4.20
   0   6 -10  165.78    4.10
   0  -6 -10  170.28    4.40
   0   6 -10  172.28    4.30
   0   6  10  173.88    4.20
   1   6 -10  106.49    2.90
  -1   6  10   97.79    2.80
   1   6 -10  103.49    3.00
  -1   6 -10   97.59    2.70
   1  -6 -10  101.19    2.90
  -1   6 -10  100.89    3.10
   1   6  10   99.69    3.10
   1  -6 -10  103.99    3.30
   2   6 -10  141.89    3.50
   2   6 -10  138.79    3.90
  -2   6 -10  144.59    4.10
   2  -6 -10  145.99    3.70
   2  -6 -10  137.59    4.10
   2   6  10  145.49    4.10
   3   6 -10  218.88    5.50
   3  -6 -10  223.88    6.00
  -3   6 -10  218.98    5.80
   3   6  10  224.58    5.80
   4   6 -10   24.00    1.80
   4  -6 -10   23.00    2.20
  -4   6 -10   25.50    2.10
   4   6  10   25.30    2.00
   5   6 -10    3.00    1.10
   5  -6 -10    2.20    1.30
  -5   6 -10    3.20    1.20
   5   6  10    3.00    1.30
   6   6 -10   18.90    2.20
   6  -6 -10   22.00    2.60
  -6   6 -10   22.00    2.30
   6   6  10   21.80    2.30
   0   7 -10  107.39    3.20
   0  -7 -10  110.49    3.20
   0   7  10  108.49    3.30
   0   7 -10  110.09    3.10
   0  -7 -10  113.19    3.50
   1   7 -10   47.20    1.90
  -1   7  10   45.40    1.90
   1   7 -10   44.10    1.90
   1  -7 -10   45.20    2.30
   1   7  10   44.20    2.10
  -1   7 -10   47.50    1.80
  -1   7 -10   49.50    2.20
   1  -7 -10   48.70    1.90
   2   7 -10   35.10    1.60
   2   7 -10   33.50    1.80
  -2   7 -10   33.20    1.90
   2  -7 -10   30.70    2.00
   2   7  10   32.80    2.10
   3   7 -10    4.10    1.00
   3   7  10    3.50    1.10
  -3   7 -10    2.60    1.00
   3  -7 -10    2.50    1.10
   4   7 -10    0.80    0.90
   4   7  10    0.20    1.00
   4  -7 -10    0.90    1.10
  -4   7 -10   -0.20    0.90
   5   7 -10   22.30    2.10
   5  -7 -10   20.30    2.30
  -5   7 -10   19.00    2.10
   5   7  10   17.80    2.00
   6   7 -10   21.90    2.30
   6  -7 -10   24.50    2.70
  -6   7 -10   20.80    2.40
   6   7  10   25.50    2.50
   0   8 -10  334.77    7.50
   0   8  10  328.47    7.40
   0   8 -10  342.57    7.10
  -1   8  10   86.09    2.90
   1   8 -10   84.19    2.80
   1   8 -10   85.69    2.80
   1  -8 -10   86.49    2.70
   1   8  10   82.69    3.00
  -1   8 -10   85.49    3.10
   1  -8 -10   84.59    3.20
   2   8 -10  120.19    3.70
   2   8 -10  128.09    3.50
   2   8  10  112.89    3.90
  -2   8 -10  128.79    4.10
   2  -8 -10  122.99    4.20
   3   8 -10   39.30    2.10
   3  -8 -10   36.80    2.50
   3   8  10   40.90    2.40
  -3   8 -10   39.60    2.40
   4   8 -10    6.50    1.30
  -4   8 -10    9.90    1.60
   4  -8 -10   10.80    1.80
   4   8  10   11.70    1.70
   5   8 -10   18.40    2.00
  -5   8 -10   14.60    2.00
   5   8  10   14.60    2.00
   5  -8 -10   15.00    2.20
   0   9 -10  126.19    3.90
   0   9  10  130.29    3.90
   1   9 -10    1.90    0.80
   1   9 -10    1.80    0.80
  -1   9  10    3.30    0.90
   1   9  10    3.30    1.00
   1  -9 -10    3.70    1.10
  -1   9 -10    3.10    1.00
   2   9 -10   30.70    1.80
   2   9 -10   25.60    1.70
   2  -9 -10   30.90    2.20
  -2   9 -10   27.10    2.10
   2   9  10   28.20    2.00
   3   9 -10   71.69    2.90
   3   9  10   67.79    3.10
   3  -9 -10   64.69    3.40
  -3   9 -10   67.39    3.10
   4   9 -10   22.50    2.10
  -4   9 -10   27.40    2.40
   4   9  10   22.60    2.30
   4  -9 -10   28.50    2.70
   5   9 -10    0.40    1.10
  -5   9 -10    0.50    1.20
   5  -9 -10    3.40    1.40
   5   9  10    1.20    1.40
   0  10 -10    8.70    1.30
   0  10  10    7.20    1.30
  -1  10  10   62.89    2.70
   1  10 -10   62.59    2.60
  -1  10 -10   70.49    3.10
   1 -10 -10   66.49    3.10
   1  10  10   72.79    3.00
   2  10 -10    5.70    1.10
   2  10 -10    7.20    1.20
   2  10  10    7.20    1.40
  -2  10 -10    5.80    1.40
   2 -10 -10    5.50    1.50
   3  10 -10  129.19    4.20
   3 -10 -10  134.39    4.90
   3  10  10  125.89    4.50
  -3  10 -10  132.49    4.60
   4  10 -10  134.59    4.50
  -4  10 -10  134.29    5.00
   4  10  10  142.89    5.00
   4 -10 -10  129.19    5.10
   5  10 -10    2.90    1.30
   5  10  10    4.30    1.50
   5 -10 -10    5.30    1.70
  -5  10 -10    3.40    1.50
   0  11  10   25.80    2.00
   0  11 -10   33.40    2.10
  -1  11  10   41.30    2.30
   1  11 -10   43.70    2.40
   1  11  10   39.80    2.60
  -1  11 -10   40.60    2.40
   2  11 -10   26.30    1.90
   2  11  10   30.60    2.30
  -2  11 -10   23.00    2.30
   2 -11 -10   31.40    2.50
   3  11 -10   43.70    2.40
  -3  11 -10   46.30    2.90
   3 -11 -10   45.30    3.00
   3  11  10   47.60    2.80
   4  11 -10   18.20    2.00
   4 -11 -10   19.40    2.40
  -4  11 -10   22.80    2.40
   4  11  10   18.20    2.30
   0  12  10   39.90    2.60
   0  12 -10   41.20    2.50
  -1  12  10   39.40    2.30
   1  12 -10   39.20    2.30
  -1  12 -10   35.80    2.40
   1  12  10   37.80    2.60
   2  12 -10   22.10    2.00
  -2  12 -10   20.50    2.20
   2 -12 -10   23.20    2.50
   2  12  10   28.90    2.60
   3 -12 -10   43.90    3.30
  -3  12 -10   49.00    3.00
   3  12  10   45.70    2.90
   0  13  10    5.10    1.40
   0  13 -10    7.30    1.40
  -1  13  10    7.10    1.40
   1  13 -10   10.40    1.60
   1  13  10    7.80    1.70
  -1  13 -10    6.50    1.50
   2  13 -10    1.90    1.70
   2  13  10    2.60    1.30
  -2  13 -10   -0.50    1.10
   0  14 -10    7.80    1.60
   0  14  10    4.90    1.60
  -1  14  10   23.70    2.20
   1  14 -10   27.20    2.40
  -1  14 -10   24.80    2.50
   1  14  10   25.00    2.50
   0   0 -11    1.20    0.70
   0   0 -11    1.50    0.40
  -1   0 -11   60.19    2.10
   1   0 -11   61.49    2.20
  -1   0 -11   60.29    2.20
  -1   0  11   62.09    1.60
  -2   0 -11    3.90    0.80
  -2   0 -11    4.50    0.90
   2   0 -11    3.00    0.80
  -3   0 -11   52.19    2.30
   3   0 -11   53.29    2.20
   4   0 -11  640.44   12.60
  -4   0 -11  616.44   13.00
  -5   0 -11    9.20    1.50
   5   0 -11   10.10    1.30
   6   0 -11    0.90    1.00
   6   0  11    1.10    1.10
   7   0 -11    3.50    1.30
   7   0  11    2.40    1.30
   0   1 -11  231.68    4.90
   0  -1 -11  223.68    5.20
   0   1  11  239.48    4.90
   0   1 -11  234.58    5.30
   0  -1 -11  237.38    4.70
   1   1 -11  179.38    3.70
  -1   1  11  182.78    3.70
   1   1 -11  170.28    4.30
  -1  -1 -11  180.58    4.40
  -1   1 -11  180.88    4.30
   1  -1 -11  181.28    4.10
   1  -1 -11  174.18    4.30
  -1   1 -11  174.38    4.30
  -2  -1 -11   73.19    2.60
   2   1 -11   66.39    2.40
  -2  -1 -11   72.69    2.50
  -2   1 -11   66.19    2.30
  -2   1 -11   69.39    2.50
   2  -1 -11   75.99    2.50
   3   1 -11   88.49    2.90
  -3  -1 -11   90.89    3.20
   3  -1 -11   89.09    2.90
  -3   1 -11   91.89    3.10
   4   1 -11   41.00    2.10
   4  -1 -11   40.70    2.00
  -4   1 -11   41.60    2.30
   5   1 -11    1.60    0.90
   5  -1 -11    1.90    0.80
  -5   1 -11    2.80    1.10
   5   1  11    1.40    1.00
   6   1 -11   26.30    2.20
   6   1  11   26.90    2.40
  -6   1 -11   23.50    2.40
   6  -1 -11   22.80    2.00
   7   1 -11   10.30    1.70
   7  -1  11    7.60    1.60
   7   1  11    8.70    1.70
   7  -1 -11    8.30    2.00
   0  -2 -11   77.29    2.50
   0   2 -11   78.09    2.50
   0   2  11   82.59    2.30
   0   2 -11   80.79    2.30
   0  -2 -11   79.19    2.10
   1   2 -11  702.13   12.70
   1   2 -11  718.23   13.50
  -1   2  11  705.73   12.70
  -1  -2 -11  687.93   13.40
  -1   2 -11  702.73   13.30
   1   2  11  701.33   13.20
   1  -2 -11  711.13   13.20
  -1   2 -11  700.73   13.30
   1  -2 -11  679.63   13.30
  -2  -2 -11  120.39    3.40
   2   2 -11  121.29    3.40
  -2   2 -11  113.79    3.20
   2  -2 -11  113.19    3.20
   2   2  11  117.49    3.30
   2  -2 -11  120.49    3.40
  -2   2 -11  111.29    3.40
   3   2 -11  153.58    4.30
   3   2  11  165.28    4.40
  -3   2 -11  153.68    4.40
   3  -2 -11  157.58    4.40
   3  -2 -11  163.48    4.20
   4   2 -11   15.60    1.50
  -4   2 -11   16.00    1.70
   4  -2 -11   19.40    1.80
   4   2  11   21.10    1.80
   4  -2 -11   21.20    1.50
   5   2 -11    9.50    1.40
   5  -2 -11    8.50    1.50
  -5   2 -11   10.10    1.60
   5   2  11    6.50    1.30
   5  -2 -11    8.40    1.20
   6   2 -11   29.00    2.20
   6  -2 -11   26.50    2.60
  -6   2 -11   31.10    2.60
   6   2  11   27.00    2.30
   7   2 -11   11.70    1.80
   7   2  11   10.50    1.80
  -7   2 -11   12.00    1.90
   0   3 -11   17.30    1.10
   0  -3 -11   15.30    1.20
   0  -3 -11   16.00    1.10
   0   3 -11   16.20    1.30
   0   3  11   18.80    1.10
  -1   3  11   57.69    1.70
   1   3 -11   49.80    2.00
  -1  -3 -11   56.19    2.10
   1   3 -11   55.29    1.70
  -1   3 -11   53.09    2.00
   1  -3 -11   56.79    2.00
   1  -3 -11   57.49    2.10
   1   3  11   54.79    2.00
  -1   3 -11   57.09    2.10
  -2  -3 -11  128.99    3.70
   2   3 -11  132.69    3.70
   2  -3 -11  132.99    3.60
   2  -3 -11  133.49    3.80
  -2   3 -11  132.39    3.70
   2   3  11  134.39    3.70
  -2   3 -11  129.69    3.50
  -3   3 -11  211.88    4.90
  -3   3 -11  207.78    5.40
   3   3  11  205.08    5.30
   3  -3 -11  205.18    5.00
   3  -3 -11  194.58    5.30
   4   3 -11   19.80    1.70
   4   3  11   16.70    1.70
   4  -3 -11   18.20    1.50
   4  -3 -11   16.90    1.70
  -4   3 -11   17.70    1.70
   5   3 -11   21.50    2.00
   5   3  11   23.70    2.10
   5  -3 -11   21.90    1.60
   5  -3 -11   21.20    2.20
  -5   3 -11   25.80    2.30
   6   3 -11   76.19    3.40
   6   3  11   82.99    3.60
  -6   3 -11   84.99    3.80
   6  -3 -11   75.69    3.70
   0  -4 -11   75.79    2.30
   0  -4 -11   73.79    2.50
   0   4 -11   76.79    2.50
   0   4  11   76.89    2.40
   0   4 -11   77.09    2.40
  -1   4  11   33.00    1.30
  -1  -4 -11   32.70    1.70
   1   4 -11   34.30    1.70
   1   4 -11   30.90    1.30
  -1   4 -11   32.20    1.50
   1  -4 -11   30.60    1.50
  -1   4 -11   30.20    1.60
   1   4  11   30.40    1.60
   1  -4 -11   31.70    1.60
   2   4 -11   29.60    1.70
   2  -4 -11   28.50    1.80
   2  -4 -11   29.80    1.50
   2   4  11   29.70    1.70
  -2   4 -11   29.90    1.50
  -2   4 -11   30.60    1.80
   3   4 -11  307.67    7.10
   3  -4 -11  315.37    6.80
  -3   4 -11  300.77    7.20
   3   4  11  302.77    7.10
  -3   4 -11  311.07    6.60
   3  -4 -11  308.37    7.30
   4   4 -11  120.79    3.90
  -4   4 -11  125.59    4.10
   4   4  11  119.49    4.00
   4  -4 -11  119.19    3.50
   4  -4 -11  117.29    4.10
   5   4 -11   13.90    1.70
   5   4  11   12.20    1.70
  -5   4 -11   12.30    1.70
   5  -4 -11   16.80    2.00
   6   4 -11   36.30    2.50
  -6   4 -11   36.40    2.70
   6   4  11   36.90    2.60
   6  -4 -11   39.40    2.80
   0   5 -11   42.10    1.80
   0   5  11   38.60    1.70
   0  -5 -11   41.40    1.80
   0   5 -11   38.90    1.70
   0  -5 -11   40.80    1.80
   1   5 -11   36.70    1.80
  -1  -5 -11   32.40    1.70
   1   5 -11   33.00    1.50
  -1   5  11   31.60    1.40
   1   5  11   31.20    1.60
   1  -5 -11   31.50    1.60
  -1   5 -11   31.00    1.70
  -1   5 -11   30.10    1.50
   1  -5 -11   32.20    1.80
   2   5 -11  311.27    7.10
  -2   5 -11  326.97    7.20
   2  -5 -11  315.97    7.30
  -2   5 -11  308.37    6.60
   2   5  11  317.97    7.20
   2  -5 -11  321.17    6.80
   3   5 -11   13.00    1.40
   3  -5 -11   13.30    1.20
   3   5  11   11.90    1.40
  -3   5 -11   12.50    1.40
   3  -5 -11   11.00    1.40
   4   5 -11   12.00    1.50
  -4   5 -11   14.40    1.80
   4  -5 -11   14.70    1.80
   4   5  11   15.40    1.70
   5   5 -11   20.00    2.00
   5   5  11   23.60    2.20
   5  -5 -11   20.20    2.20
  -5   5 -11   21.00    2.10
   6   5 -11    8.00    1.60
   6  -5 -11    7.80    1.80
  -6   5 -11    7.80    1.70
   6   5  11    9.80    1.70
   0  -6 -11    0.60    0.60
   0  -6 -11    0.90    0.70
   0   6 -11   -0.40    0.50
   0   6  11    0.80    0.70
   0   6 -11    0.80    0.60
   1   6 -11   57.49    2.10
  -1   6  11   55.79    2.10
   1   6 -11   58.29    2.20
   1  -6 -11   60.89    2.50
   1  -6 -11   57.19    2.20
   1   6  11   61.89    2.40
  -1   6 -11   58.29    2.10
  -1   6 -11   59.09    2.30
   2   6 -11  259.87    6.10
  -2   6 -11  257.57    6.20
   2  -6 -11  255.67    6.30
   2  -6 -11  254.97    5.80
   2   6  11  247.68    6.10
   3   6 -11  174.18    4.80
   3   6  11  171.98    4.90
  -3   6 -11  168.18    5.00
   3  -6 -11  182.98    5.20
   4   6 -11   18.50    1.80
   4  -6 -11   15.20    1.80
  -4   6 -11   15.60    1.80
   4   6  11   17.10    1.80
   5   6 -11   71.79    3.30
  -5   6 -11   73.29    3.50
   5   6  11   77.59    3.50
   5  -6 -11   76.59    3.70
   6   6 -11   20.60    2.30
   6  -6 -11   22.30    2.60
   6   6  11   24.80    2.40
  -6   6 -11   27.90    2.60
   0   7 -11    0.20    0.60
   0   7  11    0.10    0.70
   0  -7 -11   -0.30    0.70
   0  -7 -11    0.20    0.60
   0   7 -11   -0.20    0.70
   1   7 -11   59.59    2.20
   1   7 -11   58.59    2.30
  -1   7  11   60.39    2.20
  -1   7 -11   55.79    2.40
   1  -7 -11   54.59    2.50
   1   7  11   59.59    2.50
  -1   7 -11   57.99    2.10
   1  -7 -11   56.49    2.20
   2   7 -11  103.49    3.30
  -2   7 -11  108.09    3.60
   2   7  11  101.29    3.50
   2  -7 -11   99.29    3.60
   3   7 -11  180.58    5.00
   3   7  11  185.48    5.30
  -3   7 -11  187.78    5.30
   3  -7 -11  184.38    5.40
   4   7 -11    9.40    1.40
   4   7  11   12.00    1.70
   4  -7 -11   12.80    1.80
  -4   7 -11   11.90    1.70
   5   7 -11    2.00    1.10
   5   7  11   -0.30    1.00
   5  -7 -11    1.10    1.20
  -5   7 -11    0.30    1.10
   6   7 -11   26.30    2.60
   6   7  11   28.10    2.60
  -6   7 -11   30.70    2.90
   6  -7 -11   24.80    2.80
   0   8 -11    2.80    0.90
   0   8  11    4.50    1.00
   0   8 -11    4.00    0.80
   1   8 -11   87.99    2.90
   1   8 -11   84.49    2.90
  -1   8  11   89.39    2.90
   1  -8 -11   87.69    3.30
   1   8  11   81.09    3.10
   1  -8 -11   89.99    2.80
  -1   8 -11   84.69    3.20
   2   8 -11   95.99    3.30
  -2   8 -11   97.79    3.60
   2  -8 -11   93.59    3.70
   2   8  11   93.49    3.50
   3   8 -11   22.80    1.80
  -3   8 -11   26.20    2.20
   3  -8 -11   22.00    2.20
   3   8  11   22.40    2.10
   4   8 -11   15.10    1.70
   4   8  11   15.20    1.90
   4  -8 -11   15.30    2.10
  -4   8 -11   18.00    2.00
   5   8 -11   68.59    3.30
   5  -8 -11   72.29    3.80
   5   8  11   69.59    3.50
  -5   8 -11   68.39    3.50
   0   9 -11   62.89    2.70
   0   9  11   59.59    2.70
   1   9 -11   21.60    1.70
  -1   9  11   24.10    1.70
   1   9 -11   24.90    1.60
   1  -9 -11   25.90    2.20
   1   9  11   23.80    2.00
  -1   9 -11   23.20    1.90
   2   9 -11    0.60    0.90
   2  -9 -11    1.00    1.00
  -2   9 -11    2.70    1.10
   2   9  11    0.60    1.00
   3   9 -11   74.79    3.00
  -3   9 -11   75.49    3.50
   3  -9 -11   75.09    3.60
   3   9  11   71.99    3.30
   4   9 -11    7.20    1.40
   4   9  11    7.30    1.50
  -4   9 -11    7.80    1.70
   4  -9 -11    6.90    1.70
   5   9 -11   25.60    2.40
  -5   9 -11   24.60    2.60
   5  -9 -11   26.90    2.80
   5   9  11   28.20    2.70
   0  10 -11    3.10    1.00
   0  10  11    1.70    1.00
  -1  10  11  116.29    3.80
   1  10 -11  114.99    3.70
   1  10  11  118.99    4.00
  -1  10 -11  111.39    3.90
   1 -10 -11  107.39    4.10
   2  10 -11   37.20    2.20
   2  10  11   38.40    2.40
  -2  10 -11   33.90    2.30
   2 -10 -11   35.20    2.50
   3  10 -11   89.09    3.50
   3 -10 -11   94.19    4.00
   3  10  11   89.09    3.90
  -3  10 -11   96.79    3.90
   4  10 -11   12.20    1.70
   4  10  11   10.60    1.70
  -4  10 -11   10.90    1.80
   4 -10 -11    8.40    1.80
   0  11  11  103.59    3.80
   0  11 -11  105.19    3.90
  -1  11  11   17.80    1.70
   1  11 -11   16.70    1.70
   1  11  11   16.90    1.90
  -1  11 -11   22.30    2.10
  -2  11 -11   82.39    3.60
   2 -11 -11   83.39    4.00
   2  11  11   84.49    3.60
   3  11 -11    1.50    1.00
  -3  11 -11    6.10    1.50
   3  11  11    2.80    1.30
   3 -11 -11    4.40    1.50
   4  11 -11   19.40    2.00
   4 -11 -11   18.50    2.40
  -4  11 -11   15.10    2.10
   4  11  11   20.60    2.30
   0  12  11    2.50    1.20
   0  12 -11    1.80    1.10
  -1  12  11    1.30    1.10
   1  12 -11    1.90    1.00
   1  12  11   -0.70    0.90
  -1  12 -11    3.50    1.30
  -2  12 -11   68.19    3.50
   2  12  11   65.69    3.40
   2 -12 -11   72.69    3.70
   3 -12 -11   69.09    4.00
  -3  12 -11   72.29    3.70
   3  12  11   67.89    3.60
   0  13 -11   52.89    2.90
   0  13  11   55.39    3.00
  -1  13  11   86.59    3.60
   1  13 -11   90.29    3.70
   1  13  11   89.99    3.90
  -1  13 -11   83.39    3.90
   2  13  11   24.30    2.40
  -2  13 -11   25.00    2.50
   0   0 -12  182.38    3.80
   0   0 -12  181.48    4.10
   0   0 -12  181.58    4.50
  -1   0 -12  204.18    4.80
  -1   0 -12  195.48    4.80
   1   0 -12  198.78    4.80
  -1   0  12  204.88    4.10
  -2   0 -12    8.90    1.10
   2   0 -12    7.60    1.00
  -2   0 -12    7.50    1.10
   3   0 -12  314.97    7.20
  -3   0 -12  324.17    7.40
   4   0 -12   86.99    3.10
  -4   0 -12   84.19    3.40
  -5   0 -12    4.40    1.30
   5   0 -12    4.50    1.10
   6   0 -12   12.60    1.70
   6   0  12   14.60    1.80
   0  -1 -12    5.50    0.60
   0   1 -12    5.10    0.90
   0  -1 -12    4.00    0.80
   0   1 -12    3.90    0.70
   0   1  12    4.10    0.60
  -1   1  12  187.38    3.90
  -1  -1 -12  181.28    4.60
   1   1 -12  183.98    3.90
   1   1 -12  190.88    4.60
   1  -1 -12  186.68    4.60
   1  -1 -12  192.98    4.30
  -1   1 -12  187.38    4.60
  -1   1 -12  177.18    4.40
   2   1 -12  143.19    3.90
  -2  -1 -12  139.69    3.90
  -2  -1 -12  139.89    3.90
   2  -1 -12  144.49    3.90
  -2   1 -12  138.89    3.80
  -2   1 -12  139.99    3.90
  -3  -1 -12   50.69    2.40
   3   1 -12   50.79    2.20
  -3   1 -12   44.20    2.30
   3  -1 -12   49.00    2.10
   4   1 -12   67.19    2.70
  -4   1 -12   67.29    3.00
   4  -1 -12   72.29    2.70
   5   1 -12   14.80    1.60
   5   1  12   15.40    1.70
   5  -1 -12   15.00    1.60
  -5   1 -12   14.70    1.80
   6   1 -12   14.20    1.70
  -6   1 -12   15.30    2.00
   6   1  12   13.90    1.80
   6  -1 -12   11.90    1.60
   0   2 -12  144.39    3.80
   0   2 -12  143.09    3.50
   0   2  12  141.19    3.40
   0  -2 -12  141.99    3.80
   0  -2 -12  150.58    3.40
   1   2 -12  113.39    2.70
  -1  -2 -12  111.89    3.30
   1   2 -12  110.69    3.30
  -1   2  12  112.79    2.60
  -1   2 -12  108.49    3.20
   1   2  12  114.19    3.10
   1  -2 -12  109.09    3.00
   1  -2 -12  107.29    3.20
  -1   2 -12  111.99    3.10
  -2  -2 -12   79.09    2.70
   2   2 -12   75.39    2.70
  -2   2 -12   75.49    2.50
  -2   2 -12   73.69    2.70
   2  -2 -12   74.79    2.60
   2   2  12   73.49    2.60
   2  -2 -12   77.29    2.60
   3   2 -12   55.09    2.40
   3  -2 -12   59.79    2.50
   3  -2 -12   60.19    2.40
  -3   2 -12   59.49    2.60
  -3   2 -12   63.09    2.40
   3   2  12   56.79    2.40
   4   2 -12  167.08    4.80
  -4   2 -12  178.68    5.10
   4   2  12  170.48    4.90
   4  -2 -12  169.98    4.70
   4  -2 -12  167.58    5.00
   5   2 -12   47.60    2.50
  -5   2 -12   50.89    2.80
   5  -2 -12   49.80    2.40
   5   2  12   49.70    2.60
   5  -2 -12   50.79    2.80
   6   2 -12   13.30    1.80
  -6   2 -12    8.00    1.60
   6  -2 -12   13.50    1.90
   6   2  12   15.30    2.00
   0  -3 -12    9.70    0.90
   0  -3 -12   11.90    1.20
   0   3 -12   11.50    1.00
   0   3 -12   10.90    1.20
   0   3  12   11.70    1.00
  -1  -3 -12  144.09    4.00
   1   3 -12  150.18    3.40
   1   3 -12  149.09    4.00
  -1   3  12  151.68    3.40
  -1   3 -12  147.39    3.80
  -1   3 -12  147.89    3.90
   1  -3 -12  148.19    3.90
   1  -3 -12  151.48    3.80
   1   3  12  152.78    3.90
  -2  -3 -12   67.39    2.60
   2   3 -12   67.69    2.60
   2   3  12   76.49    2.60
  -2   3 -12   69.89    2.60
  -2   3 -12   69.79    2.40
   2  -3 -12   73.29    2.70
   2  -3 -12   76.79    2.60
   3   3 -12   66.49    2.60
  -3   3 -12   69.79    2.50
   3  -3 -12   68.29    2.60
   3  -3 -12   74.89    2.90
  -3   3 -12   66.29    2.80
   3   3  12   67.99    2.70
   4   3 -12   49.99    2.50
   4  -3 -12   50.19    2.70
   4  -3 -12   49.60    2.20
  -4   3 -12   52.29    2.70
   4   3  12   48.90    2.50
   5   3 -12   10.10    1.50
   5   3  12   11.40    1.60
  -5   3 -12   13.60    1.80
   5  -3 -12    7.50    1.30
   5  -3 -12   10.00    1.60
   6   3 -12    1.30    1.10
   6  -3 -12    2.20    1.40
  -6   3 -12    3.60    1.40
   6   3  12    4.30    1.30
   0  -4 -12  158.08    4.20
   0   4 -12  160.38    4.20
   0   4 -12  169.38    4.10
   0   4  12  165.08    4.00
   0  -4 -12  174.88    4.10
  -1  -4 -12    6.00    1.00
   1   4 -12    7.80    0.80
  -1   4  12    7.20    0.80
   1   4 -12    6.80    1.00
   1  -4 -12    7.40    1.00
   1  -4 -12    7.70    1.00
   1   4  12    9.70    1.10
  -1   4 -12    7.30    0.90
  -1   4 -12    7.60    1.00
   2   4 -12   14.60    1.40
   2  -4 -12   11.90    1.20
  -2   4 -12   14.00    1.20
   2  -4 -12   11.10    1.30
  -2   4 -12   12.10    1.30
   2   4  12   12.20    1.30
   3   4 -12   12.10    1.40
   3   4  12   14.50    1.50
  -3   4 -12   13.50    1.30
  -3   4 -12   14.10    1.50
   3  -4 -12   16.50    1.70
   3  -4 -12   12.70    1.30
   4   4 -12   80.39    3.10
   4  -4 -12   73.99    3.20
   4  -4 -12   72.19    2.70
  -4   4 -12   75.79    3.20
   4   4  12   73.79    3.10
   5   4 -12   37.90    2.40
   5   4  12   41.00    2.50
   5  -4 -12   38.40    2.80
  -5   4 -12   43.60    2.70
   6   4 -12   16.60    1.90
  -6   4 -12   15.20    2.10
   6  -4 -12   12.80    2.00
   6   4  12   15.10    2.00
   0   5 -12    5.60    0.90
   0   5 -12    5.70    0.80
   0   5  12    7.50    1.00
   0  -5 -12    5.50    0.90
   0  -5 -12    5.90    0.90
  -1   5  12   86.89    2.50
  -1  -5 -12   88.29    3.00
   1   5 -12   90.09    2.60
   1   5 -12   87.29    2.90
  -1   5 -12   87.49    2.80
   1   5  12   86.69    2.90
   1  -5 -12   90.29    3.00
  -1   5 -12   91.09    2.90
   1  -5 -12   89.99    2.90
   2   5 -12  155.68    4.30
   2  -5 -12  149.79    4.40
  -2   5 -12  156.98    4.40
   2  -5 -12  156.28    4.10
   2   5  12  151.98    4.30
  -2   5 -12  158.18    3.90
   3   5 -12   75.09    2.90
   3  -5 -12   76.29    2.70
  -3   5 -12   81.19    3.10
   3  -5 -12   76.09    3.10
   3   5  12   76.79    3.00
   4   5 -12    5.50    1.20
  -4   5 -12    5.30    1.30
   4  -5 -12    5.80    1.40
   4   5  12    7.20    1.40
   5   5 -12   14.30    1.80
   5   5  12   16.60    1.90
  -5   5 -12   16.40    2.00
   5  -5 -12   16.80    2.10
   6   5 -12   32.60    2.60
  -6   5 -12   34.90    2.90
   6   5  12   29.40    2.60
   6  -5 -12   33.50    3.00
   0   6 -12    9.40    1.10
   0   6  12   11.50    1.20
   0   6 -12   12.20    1.20
   0  -6 -12   11.00    1.30
   0  -6 -12    9.20    1.10
  -1   6  12   25.90    1.50
   1   6 -12   25.40    1.50
   1   6 -12   29.10    1.70
  -1   6 -12   30.10    1.60
   1  -6 -12   30.00    1.80
   1   6  12   29.20    1.70
   1  -6 -12   30.60    1.60
  -1   6 -12   28.10    1.80
   2   6 -12  252.17    6.20
   2   6  12  256.07    6.30
  -2   6 -12  266.37    6.40
   2  -6 -12  266.67    6.50
   2  -6 -12  259.77    6.00
   3   6 -12    8.20    1.30
   3   6  12    9.00    1.40
   3  -6 -12    7.40    1.40
  -3   6 -12    7.30    1.30
   4   6 -12   54.09    2.80
  -4   6 -12   52.39    2.80
   4  -6 -12   50.99    3.00
   4   6  12   51.39    2.70
   5   6 -12   76.79    3.40
   5   6  12   75.69    3.50
  -5   6 -12   71.49    3.50
   5  -6 -12   73.39    3.70
   6   6 -12    6.00    1.50
  -6   6 -12    4.60    1.60
   6   6  12    5.50    1.60
   6  -6 -12    6.50    1.70
   0  -7 -12  100.09    3.20
   0   7 -12   99.69    3.10
   0   7  12   99.69    3.10
   0   7 -12   93.59    3.10
   0  -7 -12   94.89    3.30
  -1   7  12  108.79    3.20
   1   7 -12  116.59    3.50
   1   7 -12  114.99    3.30
   1  -7 -12  113.19    3.70
  -1   7 -12  114.49    3.60
  -1   7 -12  107.79    3.10
   1   7  12  111.39    3.60
   1  -7 -12  109.39    3.30
   2   7 -12    6.80    1.10
   2  -7 -12    7.70    1.40
   2   7  12    5.60    1.20
   2  -7 -12    6.40    1.10
  -2   7 -12    5.90    1.20
   3   7 -12   27.50    1.90
   3   7  12   27.70    2.10
  -3   7 -12   26.40    2.00
   3  -7 -12   27.90    2.30
   4   7 -12    8.40    1.40
   4   7  12    8.10    1.50
   4  -7 -12    5.00    1.40
  -4   7 -12    6.10    1.40
   5   7 -12   39.80    2.60
  -5   7 -12   43.00    3.00
   5  -7 -12   40.70    2.90
   5   7  12   36.50    2.70
   0   8 -12  371.76    7.90
   0   8  12  367.46    8.10
   0   8 -12  364.96    8.20
   1   8 -12  113.29    3.50
   1   8 -12  107.09    3.30
  -1   8  12  104.99    3.30
  -1   8 -12   98.59    3.50
   1  -8 -12  107.19    3.70
   1   8  12   99.79    3.50
   1  -8 -12  109.79    3.30
   2   8 -12   49.20    2.30
   2  -8 -12   53.19    2.80
   2   8  12   51.69    2.60
  -2   8 -12   50.09    2.60
   3   8 -12   78.59    3.20
   3   8  12   82.29    3.50
   3  -8 -12   84.99    3.60
  -3   8 -12   83.09    3.50
   4   8 -12   95.09    3.70
   4  -8 -12   91.09    4.00
   4   8  12   89.19    3.90
  -4   8 -12   90.09    3.90
   5   8 -12    5.50    1.40
   5  -8 -12    3.80    1.60
   5   8  12    4.60    1.50
  -5   8 -12    3.30    1.50
   0   9 -12  179.48    5.00
   0   9  12  176.38    5.00
  -1   9  12   27.40    1.80
   1   9 -12   23.90    1.70
   1   9 -12   24.40    1.80
   1   9  12   24.10    2.00
  -1   9 -12   21.60    2.00
   1  -9 -12   24.20    2.20
   2   9 -12   12.30    1.40
  -2   9 -12   11.70    1.70
   2   9  12   10.70    1.60
   2  -9 -12   11.60    1.60
   3   9 -12    1.30    1.00
   3   9  12    1.30    1.10
   3  -9 -12    0.10    1.20
  -3   9 -12    0.40    1.00
   4   9 -12    1.00    1.00
   4   9  12    2.20    1.20
   4  -9 -12   -0.10    1.10
  -4   9 -12    2.20    1.30
   5   9 -12   76.09    3.60
   5   9  12   71.49    3.80
   5  -9 -12   77.79    4.20
  -5   9 -12   70.39    3.90
   0  10  12    4.90    1.20
   0  10 -12    3.70    1.10
  -1  10  12  110.89    3.70
   1  10 -12  107.89    3.70
   1 -10 -12  112.29    4.20
  -1  10 -12  106.89    3.90
   1  10  12  107.39    3.90
   2  10 -12   -0.10    0.70
   2  10  12   -0.20    1.00
  -2  10 -12   -0.80    0.90
   2 -10 -12    0.00    1.00
   3  10 -12   10.20    1.50
  -3  10 -12   10.00    1.70
   3 -10 -12   10.50    1.70
   3  10  12    7.60    1.60
   4  10 -12   84.29    3.70
   4  10  12   86.79    4.00
  -4  10 -12   87.09    4.10
   4 -10 -12   87.19    4.20
   0  11 -12   60.69    3.00
   0  11  12   62.59    3.00
   1  11 -12   35.40    2.30
  -1  11  12   35.00    2.30
   1  11  12   33.40    2.40
  -1  11 -12   37.00    2.40
   2 -11 -12   24.60    2.60
   2  11  12   29.80    2.50
  -2  11 -12   26.10    2.40
   3  11 -12   15.50    1.80
   3  11  12   20.70    2.40
  -3  11 -12   22.70    2.40
   3 -11 -12   21.40    2.40
   4  11 -12   60.39    3.10
   4 -11 -12   56.79    3.60
   0  12  12   45.00    2.60
   0  12 -12   45.40    2.70
   1  12 -12   25.70    2.20
  -1  12 -12   23.00    2.30
   1  12  12   25.00    2.40
  -2  12 -12   20.70    2.30
   2 -12 -12   24.90    2.60
   2  12  12   22.00    2.40
  -3  12 -12   43.20    3.20
   3  12  12   49.70    3.30
   3 -12 -12   43.40    3.30
   0  13  12    5.50    1.50
   0  13 -12    5.90    1.50
   1  13 -12   25.50    2.30
  -1  13 -12   28.30    2.60
   1  13  12   30.40    2.70
  -1   0 -13   92.69    2.90
   1   0 -13   92.79    3.00
  -1   0 -13   96.89    3.00
  -2   0 -13  210.78    5.30
  -2   0 -13  217.48    5.30
   2   0 -13  219.18    5.40
  -3   0 -13    5.80    1.10
   3   0 -13    7.30    1.20
  -4   0 -13    2.40    1.10
   4   0 -13    3.10    1.00
  -5   0 -13   25.30    2.40
   5   0 -13   25.20    1.90
   6   0 -13    9.10    1.50
   6   0  13    5.70    1.40
   0   1 -13  180.38    4.60
   0  -1 -13  180.08    4.60
   0   1 -13  184.38    4.30
   0   1  13  186.58    4.20
  -1  -1 -13  196.28    4.90
   1   1 -13  191.08    4.90
  -1   1 -13  195.38    4.80
   1  -1 -13  196.68    4.50
  -1   1 -13  194.68    4.70
   1   1  13  188.98    4.60
   1  -1 -13  201.48    4.90
   2   1 -13   34.00    1.80
  -2  -1 -13   31.80    1.80
   2  -1 -13   35.60    1.80
  -2   1 -13   32.80    1.70
  -2   1 -13   30.90    1.80
   3   1 -13    5.10    1.00
  -3   1 -13    5.20    1.00
  -3   1 -13    4.20    1.10
   3  -1 -13    5.40    1.00
   4   1 -13   46.30    2.30
   4   1  13   46.40    2.40
  -4   1 -13   44.20    2.50
   4  -1 -13   47.60    2.30
   5   1 -13   17.50    1.80
  -5   1 -13   19.20    2.10
   5   1  13   18.10    1.90
   5  -1 -13   14.40    1.70
   6   1 -13   27.90    2.40
  -6   1 -13   28.90    2.60
   6  -1 -13   28.50    2.10
   6   1  13   25.10    2.30
   0  -2 -13  138.39    3.80
   0   2 -13  137.39    3.50
   0   2  13  136.59    3.40
   0   2 -13  137.09    3.80
  -1  -2 -13  227.98    5.50
   1   2 -13  214.08    5.40
  -1   2 -13  229.68    5.30
  -1   2 -13  219.48    5.30
   1   2  13  227.18    5.20
   1  -2 -13  215.98    5.30
   1  -2 -13  227.58    5.10
   2   2 -13   21.60    1.60
  -2  -2 -13   23.20    1.60
   2  -2 -13   21.30    1.50
   2   2  13   22.00    1.50
  -2   2 -13   19.70    1.60
   2  -2 -13   19.50    1.40
  -2   2 -13   22.40    1.50
   3   2 -13  102.79    3.50
   3   2  13  108.29    3.50
  -3   2 -13  110.49    3.40
  -3   2 -13  104.89    3.60
   3  -2 -13  107.49    3.40
   3  -2 -13  103.99    3.50
   4   2 -13   89.59    3.30
   4  -2 -13   92.09    3.20
   4  -2 -13   91.59    3.50
  -4   2 -13   97.09    3.70
   4   2  13   89.49    3.40
   5   2 -13   25.30    2.10
   5  -2 -13   25.20    2.30
  -5   2 -13   28.80    2.50
   5  -2 -13   27.50    1.90
   5   2  13   25.20    2.20
   6   2 -13    0.50    1.20
   6   2  13   -0.10    1.00
   6  -2 -13    1.70    1.30
  -6   2 -13    0.10    1.20
   0  -3 -13  610.54   11.30
   0   3 -13  581.64   11.30
   0   3 -13  587.34   11.70
   0  -3 -13  574.94   11.70
   0   3  13  586.34   11.30
   1   3 -13   25.40    1.60
  -1  -3 -13   31.60    1.70
   1   3 -13   27.20    1.40
   1  -3 -13   27.30    1.50
  -1   3 -13   26.50    1.50
  -1   3 -13   25.90    1.60
   1   3  13   23.80    1.50
   1  -3 -13   29.70    1.60
  -2  -3 -13  545.25   11.20
   2   3 -13  531.15   11.10
   2   3  13  535.45   10.90
   2  -3 -13  540.15   10.90
   2  -3 -13  548.45   11.00
  -2   3 -13  525.15   11.00
  -2   3 -13  539.95   10.80
   3   3 -13   82.79    3.00
   3  -3 -13   79.19    3.10
  -3   3 -13   72.09    3.00
   3   3  13   76.29    3.00
  -3   3 -13   80.89    2.80
   3  -3 -13   75.09    2.80
   4   3 -13   14.20    1.60
   4   3  13   19.20    1.90
   4  -3 -13   14.60    1.80
   4  -3 -13   19.00    1.60
  -4   3 -13   17.00    1.80
   5   3 -13   35.30    2.40
   5   3  13   25.20    2.30
   5  -3 -13   31.00    2.50
  -5   3 -13   30.10    2.60
   5  -3 -13   32.40    2.10
   6   3 -13   40.30    2.80
   6   3  13   39.50    2.70
  -6   3 -13   36.30    2.80
   6  -3 -13   42.50    2.90
   0  -4 -13   35.60    1.60
   0   4 -13   34.60    1.60
   0   4  13   34.10    1.60
   0  -4 -13   34.20    1.90
   0   4 -13   31.50    1.70
  -1  -4 -13  175.38    4.60
   1   4 -13  173.58    4.50
   1   4 -13  168.08    4.00
  -1   4 -13  169.28    4.40
   1  -4 -13  166.58    4.40
   1  -4 -13  170.48    4.40
   1   4  13  169.98    4.40
  -1   4 -13  173.18    4.40
   2   4 -13   46.70    2.20
  -2   4 -13   47.70    2.30
   2   4  13   50.09    2.20
   2  -4 -13   48.40    2.20
   2  -4 -13   49.60    2.30
  -2   4 -13   47.20    2.00
   3   4 -13   44.10    2.30
   3  -4 -13   46.40    2.20
   3  -4 -13   40.50    2.30
  -3   4 -13   46.30    2.00
  -3   4 -13   44.50    2.40
   3   4  13   43.40    2.30
   4   4 -13   29.90    2.10
   4  -4 -13   39.20    2.10
   4   4  13   37.00    2.30
  -4   4 -13   34.70    2.30
   4  -4 -13   34.40    2.40
   5   4 -13   22.00    2.20
   5   4  13   20.80    2.10
  -5   4 -13   24.70    2.40
   5  -4 -13   17.20    2.10
   6   4 -13   10.60    1.80
   6  -4 -13    6.00    1.60
  -6   4 -13   12.50    2.00
   6   4  13   12.80    1.90
   0  -5 -13   10.00    1.10
   0   5  13    7.70    1.00
   0   5 -13    7.10    1.10
   0  -5 -13    9.50    1.20
   0   5 -13    9.80    1.10
   1   5 -13   21.70    1.30
   1   5 -13   21.60    1.70
  -1  -5 -13   20.60    1.60
   1   5  13   19.30    1.40
  -1   5 -13   18.90    1.40
  -1   5 -13   19.40    1.40
   1  -5 -13   19.10    1.50
   1  -5 -13   18.90    1.40
   2   5 -13   24.50    1.80
  -2   5 -13   23.70    1.40
  -2   5 -13   23.50    1.70
   2  -5 -13   23.10    1.50
   2   5  13   23.60    1.70
   2  -5 -13   26.10    1.80
   3   5 -13  188.68    5.20
   3  -5 -13  193.28    4.90
  -3   5 -13  187.08    5.30
   3   5  13  185.88    5.20
   3  -5 -13  184.98    5.30
   4   5 -13   24.20    2.10
  -4   5 -13   27.20    2.30
   4  -5 -13   27.60    2.20
   4   5  13   23.70    2.20
   5   5 -13   23.90    2.30
   5  -5 -13   20.70    2.30
   5   5  13   23.80    2.30
  -5   5 -13   24.20    2.40
   6   5 -13   41.80    2.90
   6   5  13   37.30    2.80
   6  -5 -13   38.10    3.10
  -6   5 -13   37.80    3.10
   0   6  13   80.79    2.80
   0  -6 -13   87.69    2.90
   0   6 -13   84.19    2.80
   0   6 -13   83.39    2.80
   0  -6 -13   89.79    3.00
   1   6 -13   15.30    1.40
  -1  -6 -13   14.20    1.40
   1   6 -13   13.70    1.20
  -1   6 -13   16.40    1.50
  -1   6 -13   11.70    1.20
   1  -6 -13   16.00    1.50
   1   6  13   13.60    1.40
   1  -6 -13   16.30    1.60
   2   6 -13   67.19    2.70
  -2   6 -13   72.49    3.00
   2  -6 -13   71.89    2.60
   2  -6 -13   64.69    2.80
   2   6  13   71.89    2.90
   3   6 -13  309.57    7.50
   3   6  13  313.27    7.70
  -3   6 -13  312.77    7.70
   3  -6 -13  328.97    8.00
   4   6 -13   23.30    2.10
   4  -6 -13   27.10    2.50
  -4   6 -13   27.30    2.40
   4   6  13   27.70    2.30
   5   6 -13    6.70    1.40
  -5   6 -13    5.40    1.50
   5  -6 -13    6.60    1.60
   5   6  13    5.90    1.50
   0   7 -13    5.30    1.00
   0  -7 -13    2.80    1.00
   0   7 -13    3.50    0.90
   0  -7 -13    5.00    1.10
   0   7  13    3.70    1.00
   1   7 -13   24.60    1.70
   1   7 -13   22.50    1.50
   1  -7 -13   27.00    1.70
  -1   7 -13   24.10    1.70
  -1   7 -13   21.60    1.50
   1   7  13   24.40    1.80
   1  -7 -13   24.90    1.80
   2   7 -13  151.58    4.50
   2   7  13  155.08    4.60
  -2   7 -13  161.18    4.70
   2  -7 -13  154.38    4.70
   2  -7 -13  157.18    4.60
   3   7 -13   95.89    3.60
  -3   7 -13   95.39    3.70
   3  -7 -13   99.19    3.80
   3   7  13   88.99    3.60
   4   7 -13   18.70    1.90
   4  -7 -13   19.10    2.20
   4   7  13   19.90    2.10
  -4   7 -13   23.30    2.30
   5   7 -13   29.30    2.50
   5  -7 -13   31.90    3.00
   5   7  13   28.70    2.60
  -5   7 -13   31.40    2.80
   0   8 -13  286.17    6.80
   0   8 -13  286.37    6.60
   0   8  13  275.27    6.70
   1   8 -13   69.29    2.80
   1   8 -13   71.69    2.70
   1  -8 -13   66.09    2.60
   1   8  13   65.79    2.90
   1  -8 -13   73.39    3.10
  -1   8 -13   67.69    2.90
   2   8 -13   19.20    1.70
  -2   8 -13   17.10    1.80
   2   8  13   18.40    1.90
   2  -8 -13   17.20    1.90
   3   8 -13   66.69    3.00
  -3   8 -13   71.89    3.30
   3  -8 -13   67.59    3.40
   3   8  13   62.29    3.10
   4   8 -13    1.90    1.10
   4   8  13    3.60    1.30
  -4   8 -13    0.80    1.10
   4  -8 -13    1.80    1.40
   5   8 -13   48.90    3.10
   5   8  13   50.89    3.20
  -5   8 -13   48.00    3.20
   5  -8 -13   48.50    3.30
   0   9 -13   46.50    2.40
   0   9  13   39.40    2.20
   1   9 -13  214.08    5.50
   1   9 -13  207.78    5.40
  -1   9 -13  203.08    5.70
   1   9  13  203.78    5.70
   1  -9 -13  198.38    5.80
   2   9 -13   23.60    1.80
  -2   9 -13   26.80    2.20
   2  -9 -13   28.40    2.30
   2   9  13   28.30    2.10
   3   9 -13   13.60    1.70
  -3   9 -13   17.10    2.00
   3  -9 -13   13.30    1.90
   3   9  13   12.30    1.80
   4   9 -13   25.40    2.30
   4   9  13   24.10    2.50
   4  -9 -13   22.30    2.50
  -4   9 -13   24.50    2.50
   0  10  13  352.96    8.30
   0  10 -13  352.56    8.40
   1  10 -13   17.80    1.70
  -1  10 -13   16.20    1.80
   1 -10 -13   18.80    2.00
   1  10  13   16.60    1.80
   2  10 -13   26.30    1.90
   2  10  13   27.70    2.40
   2 -10 -13   22.90    2.40
  -2  10 -13   23.10    2.20
   3  10 -13   46.50    2.60
   3 -10 -13   48.00    3.10
  -3  10 -13   48.00    3.10
   3  10  13   44.10    3.00
   4  10 -13   -0.10    1.00
   4 -10 -13   -3.40    1.10
   4  10  13    0.60    1.20
  -4  10 -13    0.50    1.30
   0  11 -13    2.80    1.20
   0  11  13    0.80    1.00
   1  11 -13   64.99    3.00
  -1  11 -13   68.69    3.30
   1  11  13   60.39    3.10
   2  11  13   33.40    2.50
   2 -11 -13   28.20    2.70
  -2  11 -13   29.80    2.60
   3  11 -13   42.10    2.50
  -3  11 -13   43.70    3.00
   3 -11 -13   44.70    3.10
   3  11  13   42.20    3.00
   0  12 -13    0.80    1.00
   0  12  13    0.80    1.00
  -1  12 -13    5.40    1.40
   1  12  13    2.80    1.20
  -2  12 -13   13.70    2.00
   2  12  13    7.10    1.70
   2 -12 -13    9.00    1.80
   0  13 -13    4.30    1.40
   0  13  13    2.00    1.30
   0   0 -14  712.73   13.40
   0   0 -14  704.03   13.90
   1   0 -14   92.49    3.10
  -1   0 -14   94.69    3.10
  -1   0 -14   96.39    3.00
  -2   0 -14  117.69    3.70
  -2   0 -14  116.99    3.60
   2   0 -14  117.89    3.60
  -3   0 -14    1.60    0.90
  -3   0 -14    2.10    0.90
   3   0 -14   -0.30    0.80
  -4   0 -14   29.10    2.20
   4   0 -14   29.40    2.00
   5   0 -14   20.80    1.90
   6   0 -14   46.20    2.70
   6   0  14   45.70    2.90
   0   1 -14  145.59    4.10
   0   1  14  153.18    3.60
   0  -1 -14  141.09    4.10
   0   1 -14  150.38    3.70
  -1  -1 -14  469.25   10.00
   1   1 -14  486.95   10.10
   1  -1 -14  495.25    9.60
  -1   1 -14  470.55   10.00
   1  -1 -14  480.95   10.00
   1   1  14  502.55    9.80
  -1   1 -14  487.25    9.90
  -2  -1 -14  226.88    5.70
   2   1 -14  221.18    5.70
   2  -1 -14  223.08    5.60
  -2   1 -14  226.38    5.60
  -2   1 -14  229.68    5.70
   2  -1 -14  236.68    5.50
   3   1 -14   26.00    1.80
  -3   1 -14   25.80    1.70
   3  -1 -14   25.40    1.70
  -3   1 -14   29.30    2.10
   4   1 -14   12.80    1.50
   4  -1 -14   11.80    1.50
   4   1  14   14.30    1.70
  -4   1 -14   12.20    1.70
   5   1 -14   30.50    2.30
   5   1  14   34.00    2.40
   5  -1 -14   34.30    2.20
  -5   1 -14   34.30    2.50
   6   1 -14   33.10    2.40
   6   1  14   30.30    2.60
   6  -1 -14   32.10    2.60
   6  -1 -14   34.80    2.40
  -6   1 -14   29.10    2.80
   0   2 -14   99.99    3.20
   0   2 -14   98.89    2.80
   0  -2 -14   94.59    3.20
   0   2  14   98.79    2.80
  -1  -2 -14   84.19    2.90
   1   2 -14   81.49    2.90
   1  -2 -14   85.59    3.00
  -1   2 -14   83.29    2.90
   1   2  14   80.09    2.70
   1  -2 -14   90.39    2.70
  -1   2 -14   81.29    2.70
  -2  -2 -14   41.50    2.10
   2   2 -14   35.60    2.00
  -2   2 -14   38.80    1.90
   2  -2 -14   38.40    2.00
  -2   2 -14   39.10    2.00
   2  -2 -14   37.60    2.00
   2   2  14   38.10    1.90
   3   2 -14   20.60    1.80
  -3   2 -14   22.20    1.90
   3   2  14   22.30    1.70
   3  -2 -14   23.40    1.70
  -3   2 -14   20.70    1.50
   3  -2 -14   22.90    1.70
   4   2 -14   98.79    3.60
   4  -2 -14   96.39    3.40
   4   2  14   98.19    3.60
  -4   2 -14   90.29    3.80
   4  -2 -14   99.29    3.70
   5   2 -14    0.00    1.00
  -5   2 -14   -0.50    1.00
   5   2  14    2.80    1.10
   5  -2 -14    1.10    1.00
   5  -2 -14    1.10    1.00
   6   2 -14   16.40    2.00
   6  -2 -14    9.70    1.80
  -6   2 -14   13.60    2.00
   6   2  14   15.50    2.00
   0  -3 -14  478.15   10.00
   0   3 -14  468.35    9.90
   0   3 -14  487.55    9.50
   0   3  14  475.35    9.40
  -1  -3 -14  396.16    8.70
   1   3 -14  403.66    8.70
  -1   3 -14  392.16    8.50
   1  -3 -14  389.66    8.60
   1  -3 -14  423.56    8.40
   1   3  14  406.86    8.50
  -1   3 -14  402.36    8.50
   2   3 -14  117.99    3.70
  -2  -3 -14  115.89    3.80
  -2   3 -14  119.59    3.50
   2  -3 -14  117.39    3.60
  -2   3 -14  114.99    3.70
   2  -3 -14  119.99    3.60
   2   3  14  121.49    3.60
   3   3 -14   41.40    2.20
   3  -3 -14   42.00    2.10
  -3   3 -14   41.30    2.00
   3   3  14   42.30    2.20
   3  -3 -14   44.70    2.40
  -3   3 -14   41.90    2.30
   4   3 -14   64.59    2.90
  -4   3 -14   68.89    3.10
   4  -3 -14   63.59    3.10
   4   3  14   59.59    2.90
   4  -3 -14   64.09    2.70
   5   3 -14    2.20    1.10
  -5   3 -14    4.80    1.40
   5   3  14    4.40    1.30
   5  -3 -14    3.80    1.10
   5  -3 -14    3.30    1.30
   6   3 -14   34.60    2.60
   6  -3 -14   38.50    3.00
   6   3  14   34.60    2.70
  -6   3 -14   33.60    3.00
   0   4 -14    1.10    0.60
   0  -4 -14    2.10    0.80
   0   4  14    0.60    0.70
   0   4 -14    0.90    0.70
  -1  -4 -14  209.48    5.50
   1   4 -14  220.78    5.50
  -1   4 -14  213.58    5.30
  -1   4 -14  210.58    5.20
   1  -4 -14  214.48    5.40
   1   4  14  210.48    5.20
   1  -4 -14  223.88    5.30
   2   4 -14  153.48    4.40
  -2  -4 -14  146.09    4.40
  -2   4 -14  149.39    4.40
  -2   4 -14  151.18    4.10
   2  -4 -14  142.99    4.20
   2   4  14  149.99    4.30
   2  -4 -14  144.49    4.10
   3   4 -14   48.10    2.40
  -3   4 -14   50.89    2.20
   3  -4 -14   49.70    2.50
   3  -4 -14   47.20    2.20
   3   4  14   45.20    2.40
  -3   4 -14   53.39    2.60
   4   4 -14   31.40    2.10
   4   4  14   34.20    2.30
   4  -4 -14   28.30    2.40
   4  -4 -14   30.50    2.00
  -4   4 -14   29.90    2.20
   5   4 -14   19.10    2.10
  -5   4 -14   22.60    2.40
   5  -4 -14   22.80    2.30
   5   4  14   22.90    2.20
   6   4 -14    3.40    1.50
   6   4  14    0.10    1.20
   6  -4 -14    2.10    1.50
  -6   4 -14    2.30    1.50
   0  -5 -14    9.70    1.30
   0   5 -14   13.00    1.40
   0   5 -14   13.40    1.30
   0   5  14   10.70    1.20
   1   5 -14   78.99    3.00
  -1  -5 -14   88.29    3.10
  -1   5 -14   80.09    2.90
   1  -5 -14   83.59    2.90
   1  -5 -14   87.09    3.00
   1   5  14   82.99    2.90
  -1   5 -14   80.69    2.80
   2   5 -14  114.99    3.80
   2  -5 -14  122.29    3.70
   2   5  14  120.99    3.80
  -2   5 -14  114.99    3.80
   2  -5 -14  117.19    3.90
  -2   5 -14  121.39    3.50
   3   5 -14  105.09    3.70
   3  -5 -14  109.59    3.50
   3   5  14  105.69    3.80
  -3   5 -14  109.19    3.90
   3  -5 -14  102.99    3.90
   4   5 -14   25.30    2.20
  -4   5 -14   25.40    2.30
   4  -5 -14   24.40    2.30
   4   5  14   27.10    2.30
   5   5 -14   76.49    3.50
  -5   5 -14   80.69    3.90
   5   5  14   75.99    3.60
   5  -5 -14   78.69    3.80
   0  -6 -14  154.48    4.40
   0   6 -14  158.58    4.30
   0   6 -14  157.38    4.40
   0   6  14  159.68    4.20
   1   6 -14   17.70    1.70
  -1  -6 -14   17.30    1.70
  -1   6 -14   18.60    1.40
   1  -6 -14   18.30    1.60
   1  -6 -14   17.90    1.60
   1   6  14   17.40    1.60
  -1   6 -14   17.70    1.60
   2   6 -14   18.10    1.70
   2  -6 -14   20.20    1.80
  -2   6 -14   19.60    1.90
   2   6  14   18.40    1.70
   2  -6 -14   20.10    1.70
   3   6 -14    8.90    1.40
  -3   6 -14    8.20    1.50
   3   6  14    9.50    1.50
   3  -6 -14    9.50    1.50
   4   6 -14   36.40    2.50
  -4   6 -14   36.30    2.60
   4   6  14   40.20    2.60
   4  -6 -14   38.10    2.70
   5   6 -14    9.30    1.60
  -5   6 -14   10.50    1.80
   5  -6 -14   11.30    1.90
   5   6  14    9.10    1.70
   0  -7 -14   74.49    2.90
   0   7 -14   78.79    2.90
   0   7 -14   78.29    2.90
   0   7  14   76.89    2.90
   1   7 -14   55.59    2.50
   1  -7 -14   55.09    2.40
  -1   7 -14   58.79    2.60
  -1   7 -14   54.39    3.30
   1   7  14   55.39    2.50
   1  -7 -14   57.09    2.60
   2   7 -14   56.29    2.60
   2  -7 -14   56.29    2.80
   2   7  14   60.89    2.80
  -2   7 -14   55.39    2.70
   2  -7 -14   59.49    2.80
   3   7 -14    3.50    1.20
  -3   7 -14    4.10    1.30
   3   7  14    2.40    1.20
   3  -7 -14    3.80    1.30
   4   7 -14   22.00    2.20
   4  -7 -14   22.50    2.30
  -4   7 -14   25.70    2.40
   4   7  14   22.40    2.30
   5   7 -14  163.18    5.50
  -5   7 -14  165.68    5.80
   5   7  14  167.58    5.80
   5  -7 -14  171.68    6.10
   0   8 -14  158.48    4.60
   0  -8 -14  156.18    4.60
   0   8 -14  160.48    4.40
   0   8  14  152.18    4.50
   1   8 -14   37.70    2.10
   1   8  14   34.70    2.20
   1  -8 -14   31.00    2.10
  -1   8 -14   38.70    2.20
   1  -8 -14   35.30    2.00
   2   8 -14   90.69    3.40
   2   8  14   91.99    3.60
  -2   8 -14   97.19    3.70
   2  -8 -14   94.99    3.70
   3   8 -14    1.70    1.00
   3   8  14    0.60    1.10
  -3   8 -14    2.60    1.20
   3  -8 -14    0.00    1.10
   4   8 -14    8.50    1.50
   4  -8 -14   13.00    2.10
  -4   8 -14    9.60    1.80
   4   8  14    7.50    1.60
   5   8 -14   27.80    2.90
   5  -8 -14   26.50    2.80
   0   9  14  135.49    4.20
   0   9 -14  134.19    4.20
   1   9 -14   25.10    1.90
   1   9  14   26.90    2.20
  -1   9 -14   27.20    2.00
   1  -9 -14   26.10    2.30
   2   9 -14    2.60    1.00
   2  -9 -14    4.20    1.30
  -2   9 -14    4.60    1.30
   2   9  14    4.00    1.20
   3   9 -14   62.19    3.00
  -3   9 -14   62.19    3.20
   3   9  14   58.39    3.10
   3  -9 -14   59.29    3.30
   4   9 -14   20.40    2.10
   4   9  14   20.10    2.30
  -4   9 -14   21.30    2.30
   4  -9 -14   16.60    2.30
   0  10  14    8.40    1.40
   0  10 -14    7.60    1.30
  -1  10 -14   23.40    2.20
   1  10  14   21.10    2.00
   1 -10 -14   22.40    2.30
   2  10 -14    3.50    1.10
  -2  10 -14    1.10    1.10
   2  10  14    4.70    1.30
   2 -10 -14    2.70    1.20
   3  10 -14    7.50    1.60
   3  10  14    8.80    1.70
   3 -10 -14    8.90    1.70
  -3  10 -14    9.80    1.80
   4 -10 -14   16.70    2.30
   0  11 -14    4.00    1.20
   0  11  14    1.90    1.10
   1  11  14   30.60    2.50
  -1  11 -14   32.70    2.40
   2 -11 -14   26.20    2.60
  -2  11 -14   28.20    2.60
   2  11  14   29.00    2.60
   3  11 -14   39.30    2.50
  -3  11 -14   42.00    2.90
   3  11  14   38.50    2.80
   3 -11 -14   40.20    3.10
   0  12  14   -0.20    0.90
   0  12 -14   -0.20    1.00
  -1  12 -14   59.19    3.20
   2  12  14   12.40    2.00
  -2  12 -14   13.90    2.00
   2 -12 -14    9.80    2.00
   0   0 -15    2.80    0.90
   1   0 -15  338.37    7.60
  -1   0 -15  321.87    7.50
  -1   0 -15  336.17    7.40
   2   0 -15   49.20    2.30
  -2   0 -15   47.10    2.30
  -2   0 -15   43.40    2.20
  -3   0 -15   20.10    2.00
   3   0 -15   20.00    1.80
  -3   0 -15   21.40    1.80
  -4   0 -15  103.09    4.00
   4   0 -15   99.89    3.70
   5   0 -15   27.80    2.10
   6   0 -15   26.30    2.40
   6   0  15   29.20    2.60
   0  -1 -15    0.10    0.70
   0   1 -15    1.50    0.60
   0   1  15    0.30    0.50
   0   1 -15    0.70    0.80
   1   1 -15  419.46    9.20
  -1  -1 -15  430.66    9.20
   1  -1 -15  428.36    9.20
  -1   1 -15  429.96    9.00
   1   1  15  429.36    8.80
  -1   1 -15  416.96    9.10
  -2  -1 -15  323.87    7.50
   2   1 -15  324.27    7.50
   2  -1 -15  321.17    7.20
   2   1  15  325.67    7.30
   2  -1 -15  322.37    7.50
  -2   1 -15  323.87    7.40
  -2   1 -15  314.07    7.40
   3   1 -15    8.00    1.30
   3   1  15   10.40    1.40
   3  -1 -15    9.70    1.30
  -3   1 -15    8.90    1.30
   3  -1 -15   10.30    1.30
  -3   1 -15    7.40    1.30
   4   1 -15   33.00    2.20
   4  -1 -15   31.80    2.10
  -4   1 -15   33.70    2.30
   4   1  15   31.60    2.20
   5   1 -15   11.10    1.60
   5  -1 -15    8.80    1.40
   5   1  15   12.00    1.70
  -5   1 -15    8.50    1.80
   6   1 -15   48.20    2.80
   6   1  15   45.20    2.90
   6  -1 -15   49.99    2.90
   6  -1 -15   44.00    3.10
   0   2 -15   18.90    1.30
   0   2  15   19.10    1.30
   0  -2 -15   20.10    1.70
   0   2 -15   19.20    1.60
  -1  -2 -15   91.09    3.20
   1   2 -15   89.79    3.20
   1  -2 -15   89.89    3.20
   1   2  15   92.89    2.90
  -1   2 -15   94.19    3.00
  -1   2 -15   87.79    3.10
   2   2 -15   40.10    2.20
  -2  -2 -15   42.10    2.20
  -2   2 -15   43.60    2.20
   2  -2 -15   45.30    2.20
   2  -2 -15   42.60    2.20
  -2   2 -15   45.50    2.10
   2   2  15   42.20    2.20
   3   2 -15    9.20    1.40
   3  -2 -15    9.50    1.40
   3  -2 -15    9.70    1.40
  -3   2 -15    7.60    1.40
  -3   2 -15    8.70    1.20
   3   2  15    8.20    1.30
   4   2 -15   61.79    2.90
   4   2  15   58.79    2.90
   4  -2 -15   57.49    2.70
   4  -2 -15   59.59    3.00
  -4   2 -15   55.79    2.90
   5   2 -15   41.70    2.60
   5   2  15   38.80    2.50
   5  -2 -15   37.90    2.60
  -5   2 -15   38.90    2.70
   5  -2 -15   40.50    2.50
   6   2 -15   33.10    2.50
   6  -2 -15   37.40    2.80
  -6   2 -15   34.20    3.00
   6   2  15   39.50    3.00
   0   3 -15  281.77    6.30
   0   3 -15  290.17    6.70
   0  -3 -15  284.57    6.80
   0   3  15  281.37    6.20
  -1  -3 -15  202.68    5.40
   1   3 -15  203.18    5.40
  -1   3 -15  208.48    5.30
   1  -3 -15  201.98    5.30
  -1   3 -15  207.88    5.20
   1   3  15  207.48    5.10
  -2  -3 -15   86.89    3.30
   2   3 -15   91.79    3.30
   2  -3 -15   91.99    3.20
  -2   3 -15   94.89    3.20
   2   3  15   91.79    3.20
  -2   3 -15   93.49    3.30
   2  -3 -15   94.29    3.20
   3   3 -15   96.29    3.50
  -3   3 -15   95.09    3.60
   3  -3 -15   96.99    3.50
  -3   3 -15   95.59    3.30
   3  -3 -15   96.99    3.40
   3   3  15  101.79    3.60
   4   3 -15   36.00    2.30
  -4   3 -15   33.90    2.40
   4  -3 -15   34.70    2.20
   4   3  15   39.50    2.40
   4  -3 -15   35.50    2.50
   5   3 -15    4.80    1.30
   5   3  15    4.20    1.30
   5  -3 -15    6.10    1.40
  -5   3 -15    3.80    1.50
   5  -3 -15    2.70    1.10
   6   3 -15    6.90    1.60
   6  -3 -15    6.60    1.70
   0   4 -15  126.19    3.80
   0   4  15  125.99    3.50
   0  -4 -15  127.39    3.90
   0   4 -15  131.69    3.60
   1   4 -15   88.09    3.20
  -1  -4 -15   91.69    3.30
  -1   4 -15   91.09    3.10
   1   4  15   89.89    3.10
  -1   4 -15   92.89    3.10
   1  -4 -15   89.89    3.20
   2   4 -15  208.48    5.70
  -2  -4 -15  222.98    5.90
  -2   4 -15  217.58    5.70
   2  -4 -15  213.38    5.60
  -2   4 -15  220.38    5.40
   2  -4 -15  229.88    5.70
   2   4  15  216.78    5.60
   3   4 -15    1.90    1.00
   3  -4 -15    2.80    1.00
  -3   4 -15    2.70    0.90
  -3   4 -15    1.70    1.00
   3   4  15    2.50    1.00
   3  -4 -15    2.00    1.00
   4   4 -15    0.60    1.00
   4  -4 -15    0.50    0.90
   4   4  15    2.20    1.10
   4  -4 -15    1.00    1.00
  -4   4 -15    0.00    1.20
   5   4 -15   27.20    2.40
   5  -4 -15   29.70    2.70
  -5   4 -15   25.30    2.60
   5   4  15   25.90    2.40
   0   5  15  458.25    9.30
   0   5 -15  441.46    9.60
   0  -5 -15  444.16    9.60
   0   5 -15  446.46    9.30
   1   5 -15   16.60    1.60
  -1  -5 -15   16.10    1.60
  -1   5 -15   15.50    1.50
   1  -5 -15   18.10    1.60
   1  -5 -15   17.60    2.30
  -1   5 -15   14.10    1.40
   1   5  15   14.70    1.50
   2   5 -15   41.70    2.30
  -2   5 -15   42.30    2.00
   2  -5 -15   41.40    2.30
   2  -5 -15   47.30    2.20
   2   5  15   45.00    2.40
  -2   5 -15   47.30    2.40
   3   5 -15   22.80    2.00
  -3   5 -15   19.70    1.90
   3   5  15   20.80    1.90
   3  -5 -15   23.60    2.10
   3  -5 -15   20.80    1.80
   4   5 -15    3.20    1.20
  -4   5 -15    1.80    1.30
   4  -5 -15    1.50    1.00
   4   5  15    1.10    1.00
   5   5 -15    7.00    1.60
   5  -5 -15    7.60    1.80
  -5   5 -15    6.50    1.60
   5   5  15    9.30    1.70
   0   6  15  360.86    8.00
   0   6 -15  369.06    8.20
   0  -6 -15  365.26    8.30
   0   6 -15  369.16    8.00
   1   6 -15    9.60    1.40
  -1  -6 -15    9.60    1.30
   1  -6 -15    9.90    1.30
  -1   6 -15    7.40    1.20
   1  -6 -15    9.70    1.50
   1   6  15    9.70    1.30
  -1   6 -15    6.50    1.20
   2   6 -15    9.80    1.40
   2  -6 -15    8.90    1.30
  -2   6 -15   11.40    1.50
   2  -6 -15   10.30    1.50
   2   6  15   10.10    1.40
   3   6 -15    2.30    1.00
   3   6  15    2.20    1.10
   3  -6 -15    0.90    0.90
  -3   6 -15    2.80    1.20
   4   6 -15   29.10    2.20
  -4   6 -15   27.00    2.40
   4  -6 -15   21.60    2.30
   4   6  15   29.40    2.60
   5   6 -15   69.99    3.50
   5   6  15   68.29    3.60
  -5   6 -15   68.69    3.90
   5  -6 -15   71.69    3.90
   0   7  15    6.80    1.20
   0   7 -15    7.00    1.20
   0   7 -15    8.50    1.20
   0  -7 -15    7.30    1.20
   1   7 -15  165.18    4.70
  -1   7 -15  163.38    4.70
   1  -7 -15  158.58    4.80
   1  -7 -15  164.18    4.60
   1   7  15  149.39    4.60
   2   7 -15   26.40    2.10
  -2   7 -15   24.70    2.10
   2  -7 -15   24.00    1.90
   2  -7 -15   25.60    1.70
   2   7  15   24.30    2.10
   3   7 -15   73.49    3.20
   3  -7 -15   80.49    3.60
  -3   7 -15   78.39    3.50
   3   7  15   79.39    3.40
   4   7 -15    3.40    1.20
   4   7  15    4.20    1.50
  -4   7 -15    4.00    1.40
   4  -7 -15    4.30    1.40
   5   7 -15    4.60    1.60
   5  -7 -15    4.20    1.70
  -5   7 -15    4.50    1.80
   5   7  15    4.90    1.90
   0   8  15  107.79    3.60
   0   8 -15  111.99    3.70
   0   8 -15  106.29    3.70
   0  -8 -15  111.09    3.70
   1   8 -15   48.80    2.40
   1  -8 -15   51.59    2.50
  -1   8 -15   51.49    2.60
   1   8  15   43.40    2.40
   1  -8 -15   48.00    2.50
   2   8 -15  111.09    3.90
   2  -8 -15  112.79    4.10
   2   8  15  114.39    4.10
  -2   8 -15  111.49    4.10
   3   8 -15   24.10    2.20
   3   8  15   24.50    2.30
  -3   8 -15   27.40    2.50
   3  -8 -15   23.50    2.40
   4   8 -15   27.50    2.50
   4  -8 -15   27.10    2.70
   4   8  15   26.30    2.50
  -4   8 -15   20.50    2.30
   0   9  15    2.30    1.00
   0   9 -15    0.10    0.90
   1   9 -15   16.60    1.70
  -1   9 -15   14.00    1.80
   1   9  15   15.60    1.80
   1  -9 -15   15.00    1.90
   2   9 -15   21.50    2.00
  -2   9 -15   26.10    2.30
   2   9  15   26.50    2.30
   2  -9 -15   21.90    2.20
   3   9 -15   52.79    2.90
   3  -9 -15   51.39    3.10
  -3   9 -15   46.30    3.00
   3   9  15   50.09    3.00
   4   9 -15    5.60    1.40
   4   9  15    9.50    1.90
   4  -9 -15    9.60    1.90
  -4   9 -15   10.20    1.90
   0  10 -15   16.10    1.70
  -1  10 -15   10.70    1.60
   1 -10 -15   10.30    2.00
   1  10  15    8.10    1.40
   2  10 -15   16.50    1.80
   2  10  15   18.50    2.10
  -2  10 -15   14.90    2.00
   2 -10 -15   20.60    2.30
   3  10 -15   25.40    2.30
   3  10  15   29.50    2.60
  -3  10 -15   33.70    2.90
   3 -10 -15   31.20    2.90
   0  11 -15    2.30    1.20
  -1  11 -15   23.00    2.20
   1  11  15   23.70    2.20
  -2  11 -15   16.10    2.10
   2 -11 -15   17.30    2.20
   2  11  15   17.50    2.10
   0  12 -15   -0.20    1.10
   1  12  15   44.60    3.00
  -1  12 -15   45.30    2.90
   0   0 -16  432.76    9.40
   1   0 -16  134.99    4.10
  -1   0 -16  132.09    3.90
  -1   0 -16  137.89    4.10
   2   0 -16    5.40    1.20
  -2   0 -16    5.90    1.20
  -2   0 -16    4.90    1.10
   3   0 -16   23.50    2.10
  -3   0 -16   21.60    1.90
  -3   0 -16   23.70    2.10
   4   0 -16   51.59    2.70
  -4   0 -16   54.49    2.90
   5   0 -16   13.70    1.80
   5   0  16   12.50    1.80
   0   1 -16   -0.60    0.70
   0  -1 -16    0.30    0.80
  -1  -1 -16   80.39    3.10
   1   1 -16   82.09    3.10
  -1   1 -16   79.29    2.90
   1   1  16   83.49    2.80
  -1   1 -16   82.29    3.10
   1  -1 -16   82.69    3.10
   2   1 -16  250.07    6.30
  -2  -1 -16  249.78    6.30
   2  -1 -16  253.97    6.00
  -2   1 -16  248.98    6.30
   2  -1 -16  243.88    6.30
   2   1  16  254.77    6.10
  -2   1 -16  241.88    6.20
   3   1 -16    6.10    1.20
  -3   1 -16    4.40    1.20
   3   1  16    4.90    1.10
   3  -1 -16    6.90    1.30
  -3   1 -16    4.30    1.10
   3  -1 -16    3.30    1.10
   4   1 -16   27.70    2.10
  -4   1 -16   28.60    2.40
   4  -1 -16   26.40    2.00
   4   1  16   25.40    2.20
   4  -1 -16   31.90    2.30
   5   1 -16    6.30    1.40
  -5   1 -16    5.10    1.60
   5  -1 -16    3.70    1.30
   5   1  16    5.10    1.40
   5  -1 -16    5.80    1.30
   0   2 -16   17.30    1.70
   0   2 -16   19.90    1.70
   0  -2 -16   18.70    1.70
   1   2 -16   84.49    3.20
  -1  -2 -16   82.79    3.10
   1   2  16   83.99    2.80
  -1   2 -16   85.89    3.10
   1  -2 -16   90.19    3.20
  -1   2 -16   86.89    3.00
   2   2 -16   23.10    1.80
  -2  -2 -16   22.20    1.90
  -2   2 -16   21.50    1.90
   2  -2 -16   26.10    1.70
  -2   2 -16   26.60    1.80
   2  -2 -16   23.80    1.80
   2   2  16   24.50    1.70
   3   2 -16    1.80    1.00
   3   2  16    1.00    0.90
   3  -2 -16    2.80    1.00
   3  -2 -16    2.10    1.00
  -3   2 -16    3.00    0.90
  -3   2 -16    2.50    1.10
   4   2 -16    6.70    1.40
  -4   2 -16    7.90    1.50
   4   2  16    7.40    1.40
   4  -2 -16    9.10    1.50
   4  -2 -16    9.80    1.50
   5   2 -16   66.59    3.30
  -5   2 -16   72.39    3.60
   5  -2 -16   71.29    3.20
   5   2  16   62.59    3.20
   5  -2 -16   70.69    3.60
   0   3 -16  516.45   10.80
   0  -3 -16  508.75   10.90
   0   3 -16  515.45   10.80
   1   3 -16   54.69    2.50
  -1  -3 -16   55.79    2.50
   1   3  16   49.20    2.20
  -1   3 -16   47.10    2.30
   1  -3 -16   50.19    2.40
  -1   3 -16   49.30    2.40
  -2  -3 -16   26.50    1.90
   2   3 -16   24.00    1.80
  -2   3 -16   25.00    1.70
  -2   3 -16   25.90    1.80
   2  -3 -16   25.20    1.80
   2  -3 -16   23.00    1.70
   2   3  16   23.00    1.70
   3   3 -16   35.70    2.30
  -3   3 -16   33.30    2.00
  -3   3 -16   38.40    2.30
   3   3  16   37.70    2.20
   3  -3 -16   33.00    2.10
   3  -3 -16   37.60    2.30
   4   3 -16   25.10    2.20
  -4   3 -16   21.70    2.20
   4  -3 -16   22.30    2.00
   4  -3 -16   18.90    2.10
   4   3  16   21.50    2.10
   5   3 -16   73.29    3.50
  -5   3 -16   71.29    3.70
   5   3  16   68.09    3.40
   5  -3 -16   77.69    3.70
   5  -3 -16   75.79    3.20
   0   4 -16    1.60    0.80
   0   4 -16    2.20    1.00
   0  -4 -16    2.00    0.90
   1   4 -16  181.68    5.10
  -1  -4 -16  173.08    5.00
  -1   4 -16  172.28    4.80
   1  -4 -16  173.58    4.90
  -1   4 -16  186.58    4.90
   1   4  16  178.38    4.80
  -2  -4 -16   47.30    2.50
   2   4 -16   42.40    2.40
   2   4  16   44.70    2.30
   2  -4 -16   42.50    2.30
   2  -4 -16   45.90    2.30
  -2   4 -16   41.40    2.20
  -2   4 -16   45.60    2.50
   3   4 -16   22.20    2.10
  -3   4 -16   26.90    2.30
   3   4  16   24.30    2.10
  -3   4 -16   28.80    1.90
   3  -4 -16   26.30    2.00
   3  -4 -16   22.30    1.80
   4   4 -16  127.49    4.50
   4  -4 -16  135.59    4.80
   4   4  16  137.29    4.80
  -4   4 -16  130.59    4.70
   4  -4 -16  143.79    4.50
   5   4 -16   81.29    3.80
  -5   4 -16   82.09    4.00
   5  -4 -16   82.79    3.90
   5   4  16   88.19    4.00
   0  -5 -16  473.75   10.20
   0   5 -16  471.15   10.20
   0   5 -16  470.05    9.80
   1   5 -16  135.19    4.30
  -1  -5 -16  137.09    4.40
   1  -5 -16  141.89    4.30
   1   5  16  147.39    4.20
  -1   5 -16  139.39    4.10
  -1   5 -16  144.79    4.30
   2   5 -16    7.90    1.30
  -2   5 -16    8.40    1.40
  -2   5 -16    2.80    1.00
   2   5  16    6.10    1.20
   2  -5 -16    9.40    1.40
   2  -5 -16    7.20    1.20
   3   5 -16   34.50    2.30
   3   5  16   30.30    2.20
  -3   5 -16   32.40    2.30
   3  -5 -16   32.40    2.30
   3  -5 -16   31.20    2.00
   4   5 -16   10.40    1.60
  -4   5 -16    5.30    1.50
   4   5  16    4.60    1.30
   4  -5 -16    9.40    1.70
   5   5 -16    2.00    1.30
  -5   5 -16    2.30    1.40
   5  -5 -16    3.50    1.60
   5   5  16    4.20    1.40
   0   6 -16   44.00    2.20
   0   6 -16   43.40    2.40
   0  -6 -16   40.60    2.30
  -1  -6 -16   82.09    3.30
   1   6 -16   76.79    3.20
  -1   6 -16   76.49    2.90
  -1   6 -16   82.29    3.10
   1   6  16   74.89    3.00
   1  -6 -16   83.19    3.10
   2   6 -16    6.40    1.30
  -2   6 -16    2.40    1.00
   2   6  16    4.80    1.20
   2  -6 -16    2.10    1.10
   2  -6 -16    2.50    0.90
   3   6 -16   -0.50    0.90
  -3   6 -16    0.70    1.00
   3  -6 -16   -1.30    0.80
   3   6  16    0.40    1.10
   4   6 -16    7.50    1.60
  -4   6 -16    8.70    1.70
   4  -6 -16   11.40    1.90
   4   6  16    7.10    1.50
   5   6 -16   26.30    2.90
  -5   6 -16   33.30    4.50
   5   6  16   27.50    3.10
   5  -6 -16   20.90    2.50
   0   7 -16    0.70    0.80
   0  -7 -16    0.70    0.90
   0   7 -16    0.70    0.90
   1   7 -16   78.39    3.10
   1  -7 -16   74.99    3.00
   1   7  16   72.29    3.00
  -1   7 -16   67.39    3.00
   2   7 -16   11.00    1.50
   2   7  16   13.20    1.60
  -2   7 -16   12.30    1.60
   2  -7 -16    9.50    1.50
   2  -7 -16   11.70    1.60
   3   7 -16   30.90    2.20
  -3   7 -16   29.60    2.50
   3   7  16   32.70    2.40
   3  -7 -16   33.60    2.40
   4   7 -16    2.70    1.30
   4  -7 -16    3.70    1.50
   4   7  16   -0.90    1.10
  -4   7 -16    0.70    1.30
   0   8 -16  111.89    4.10
   0  -8 -16  104.29    3.70
   1   8 -16    4.40    1.20
  -1   8 -16    5.80    1.20
   1  -8 -16    4.20    1.10
   1   8  16    5.30    1.30
   2   8 -16   34.50    2.30
  -2   8 -16   45.20    2.70
   2   8  16   40.20    2.60
   2  -8 -16   39.30    2.60
   3   8 -16   23.30    2.20
  -3   8 -16   29.10    2.60
   3   8  16   24.30    2.30
   3  -8 -16   30.00    2.70
   4   8 -16   15.80    2.00
  -4   8 -16   17.60    2.20
   4   8  16   17.60    2.20
   4  -8 -16   18.10    2.30
   1   9 -16   28.10    2.00
  -1   9 -16   29.30    2.20
   1   9  16   26.80    2.30
   2   9 -16   30.00    2.20
  -2   9 -16   27.60    2.40
   2  -9 -16   28.30    2.50
   2   9  16   26.50    2.40
   3   9 -16   22.30    2.20
   3  -9 -16   22.80    2.40
   3   9  16   29.50    2.70
  -3   9 -16   21.30    2.40
  -1  10 -16   31.20    2.40
   1  10  16   27.00    2.40
   2  10 -16   24.20    2.60
   2 -10 -16   33.00    2.60
   2  10  16   30.50    2.60
  -2  10 -16   29.50    2.70
   3  10 -16   10.30    1.80
  -3  10 -16   11.20    2.00
   3  10  16   12.10    1.90
   3 -10 -16   11.10    2.00
  -1  11 -16    4.50    1.50
   1  11  16    6.50    1.60
   0   0 -17    0.70    0.90
   1   0 -17   -0.80    0.70
  -1   0 -17   -1.00    0.80
   2   0 -17   95.69    3.50
  -2   0 -17   93.39    3.50
  -2   0 -17   92.89    3.40
   3   0 -17    3.60    1.10
  -3   0 -17    3.70    1.30
  -3   0 -17    4.70    1.20
   4   0 -17   -0.10    1.00
   5   0 -17   61.79    3.10
   5   0  17   59.99    3.20
   0  -1 -17   61.39    2.70
   0   1 -17   64.29    2.80
  -1  -1 -17  125.29    4.00
   1   1 -17  124.99    4.10
  -1   1 -17  126.09    3.80
   1   1  17  126.89    3.70
   1  -1 -17  119.39    4.00
  -1   1 -17  124.29    4.00
  -2  -1 -17    6.90    1.30
   2   1 -17    8.70    1.40
  -2   1 -17    7.30    1.20
   2  -1 -17    7.70    1.30
  -2   1 -17    7.00    1.20
   2   1  17    6.80    1.20
   3   1 -17   13.60    1.70
  -3   1 -17   14.40    1.60
  -3   1 -17   13.70    1.70
   3   1  17   14.50    1.60
   3  -1 -17   17.10    1.80
   3  -1 -17   15.60    1.70
   4   1 -17    1.40    1.00
   4  -1 -17    2.00    1.10
  -4   1 -17    1.50    1.20
   4  -1 -17    4.80    1.30
   4   1  17    0.70    1.00
   5   1 -17    6.90    1.50
   5  -1 -17    7.40    1.60
   5   1  17    6.80    1.60
   5  -1 -17    5.70    1.40
  -5   1 -17    5.10    1.60
   0  -2 -17   33.80    2.20
   0   2 -17   31.60    2.00
   1   2 -17   28.10    2.00
  -1  -2 -17   25.00    1.90
  -1   2 -17   28.20    1.90
   1  -2 -17   31.00    2.10
  -1   2 -17   30.90    1.90
   1   2  17   30.00    1.70
  -2  -2 -17   47.00    2.50
   2   2 -17   47.00    2.50
  -2   2 -17   45.90    2.40
   2   2  17   46.40    2.30
   2  -2 -17   45.00    2.50
  -2   2 -17   46.90    2.40
   3   2 -17   66.99    3.10
   3  -2 -17   74.79    3.10
  -3   2 -17   73.39    3.20
   3   2  17   72.69    3.10
  -3   2 -17   73.09    3.00
   3  -2 -17   74.99    3.10
   4   2 -17   23.40    2.20
   4  -2 -17   19.60    2.00
   4   2  17   17.60    1.90
   4  -2 -17   21.50    2.00
  -4   2 -17   18.20    2.10
   5   2 -17   17.40    2.20
   5   2  17   15.60    2.00
  -5   2 -17   19.80    2.30
   5  -2 -17   22.40    2.20
   5  -2 -17   17.70    2.10
   0   3 -17   14.40    1.60
   0  -3 -17   13.50    1.50
   1   3 -17   66.89    2.90
  -1  -3 -17   69.59    3.00
  -1   3 -17   74.19    2.80
  -1   3 -17   74.09    3.00
   1  -3 -17   67.99    2.90
   1   3  17   73.89    2.80
  -2  -3 -17   23.50    2.10
   2   3 -17   25.00    2.10
   2  -3 -17   26.00    2.00
  -2   3 -17   24.80    1.80
   2   3  17   24.30    1.90
  -2   3 -17   24.70    1.90
   3   3 -17    2.00    1.10
  -3   3 -17    1.30    1.10
   3   3  17    1.20    1.00
   3  -3 -17    2.80    1.10
   3  -3 -17    1.90    1.00
  -3   3 -17    1.70    1.00
   4   3 -17    0.40    1.20
   4  -3 -17    2.10    1.00
   4  -3 -17    1.10    1.10
   4   3  17    1.70    1.10
  -4   3 -17    2.10    1.30
   5   3 -17   13.20    1.90
   5  -3 -17   14.50    2.10
   5  -3 -17   11.70    1.60
   5   3  17   12.70    1.90
  -5   3 -17   14.40    2.20
   0   4 -17   68.99    2.90
   0  -4 -17   64.49    2.90
  -1  -4 -17   41.50    2.40
   1   4 -17   43.70    2.40
  -1   4 -17   40.70    2.20
   1   4  17   43.50    2.20
  -1   4 -17   45.00    2.30
   1  -4 -17   42.10    2.40
  -2  -4 -17   10.20    1.50
   2   4 -17   12.20    1.60
  -2   4 -17   11.30    1.50
   2   4  17   10.50    1.40
  -2   4 -17   13.50    1.60
   2  -4 -17   10.80    1.50
   3   4 -17    6.00    1.30
   3  -4 -17    6.70    1.30
  -3   4 -17    9.50    1.60
   3   4  17    6.60    1.30
  -3   4 -17    5.70    1.10
   3  -4 -17    8.00    1.50
   4   4 -17   61.09    3.20
  -4   4 -17   57.99    3.20
   4  -4 -17   62.59    2.90
   4   4  17   67.09    3.30
   4  -4 -17   66.89    3.40
   5   4 -17   18.20    2.20
   5  -4 -17   20.10    2.30
   5   4  17   18.40    2.30
  -5   4 -17   21.50    2.50
   0  -5 -17    3.70    1.10
   0   5 -17    4.30    1.10
  -1  -5 -17  139.19    4.40
   1   5 -17  131.99    4.30
  -1   5 -17  131.09    4.20
  -1   5 -17  133.19    4.10
   1   5  17  132.59    4.10
   1  -5 -17  131.89    4.20
   2   5 -17    2.70    1.20
  -2   5 -17    0.30    0.90
   2   5  17    2.90    1.10
  -2   5 -17    1.90    1.10
   2  -5 -17    1.30    0.90
   3   5 -17   22.90    2.10
   3   5  17   19.80    2.00
   3  -5 -17   24.00    2.20
   3  -5 -17   20.20    1.90
  -3   5 -17   26.10    2.30
   4   5 -17   90.59    3.90
   4   5  17   91.29    4.00
  -4   5 -17   86.99    3.90
   4  -5 -17   87.69    4.00
   5  -5 -17   64.99    3.70
   0  -6 -17  113.79    4.10
   0   6 -17  127.29    4.10
  -1  -6 -17   46.60    2.50
   1   6 -17   40.80    2.40
   1   6  17   40.60    2.30
  -1   6 -17   46.50    2.40
   1  -6 -17   42.30    2.40
  -1   6 -17   42.40    2.30
   2   6 -17   15.10    1.80
   2   6  17   17.70    1.80
  -2   6 -17   14.70    1.70
   2  -6 -17   15.30    1.70
   3   6 -17   49.00    2.80
  -3   6 -17   53.19    3.00
   3  -6 -17   54.09    3.00
   3   6  17   53.69    2.90
   4   6 -17    9.00    1.60
   4   6  17    9.60    1.80
   4  -6 -17    6.10    1.60
  -4   6 -17    9.40    1.70
   0  -7 -17  121.59    4.20
   0   7 -17  127.09    4.10
   1   7 -17   16.40    1.80
   1   7  17   19.40    1.80
  -1   7 -17   21.00    2.00
   1  -7 -17   21.30    1.90
   2   7 -17    1.40    1.00
   2   7  17    1.80    1.10
  -2   7 -17    0.10    1.00
   2  -7 -17   -0.10    0.90
   3   7 -17    1.80    1.10
   3   7  17    3.80    1.30
  -3   7 -17    1.40    1.20
   3  -7 -17    2.70    1.30
   4   7 -17    7.40    1.60
   4   7  17   13.60    2.00
   4  -7 -17    8.10    1.70
  -4   7 -17    9.80    1.90
   0  -8 -17    4.20    1.20
   1   8 -17   20.70    1.90
  -1   8 -17   16.80    1.90
   1  -8 -17   20.90    1.90
   1   8  17   16.90    1.90
   2   8 -17   18.90    2.00
   2   8  17   21.20    2.10
  -2   8 -17   18.80    2.10
   3   8 -17    9.60    1.70
   3   8  17   13.20    1.90
   3  -8 -17   15.50    2.10
  -3   8 -17   16.40    2.00
   1   9  17    5.10    1.40
  -1   9 -17    5.40    1.40
   2   9 -17   28.00    2.40
  -2   9 -17   27.50    2.50
   2   9  17   24.60    2.40
   3   9 -17   34.40    2.50
  -3   9 -17   30.50    2.80
   3   9  17   31.50    2.80
   3  -9 -17   36.00    2.90
   1  10  17   44.80    2.80
  -1  10 -17   40.30    2.60
  -2  10 -17   41.20    2.80
   2  10  17   38.10    2.80
   0   0 -18    0.70    1.00
   1   0  18    2.20    0.80
   1   0 -18    2.90    1.00
  -1   0 -18    1.90    1.00
  -2   0 -18    6.50    1.30
   2   0 -18    7.60    1.40
   3   0 -18   15.60    1.90
  -3   0 -18   16.10    1.80
   4   0  18  131.39    4.60
   4   0 -18  134.49    4.70
   5   0  18   26.50    2.50
   5   0 -18   27.10    2.50
   0  -1 -18    1.70    0.90
   0   1 -18    0.90    0.90
  -1  -1 -18    5.30    1.20
   1   1 -18    6.40    1.30
  -1   1 -18    6.10    1.20
  -1   1 -18    7.90    1.20
   1  -1 -18    5.20    1.20
   1   1  18    7.10    1.00
  -2  -1 -18   81.29    3.40
   2   1 -18   90.69    3.50
   2   1  18   84.59    3.20
  -2   1 -18   84.09    3.30
   2  -1 -18   88.69    3.50
  -2   1 -18   80.79    3.30
   3   1 -18    0.70    1.00
  -3  -1 -18    2.00    1.10
  -3   1 -18    1.10    1.00
   3   1  18    1.30    1.10
  -3   1 -18    2.10    1.10
   3  -1 -18    0.60    0.90
   4   1 -18   18.50    2.10
   4  -1 -18   20.30    2.10
  -4   1 -18   24.10    2.40
   4  -1 -18   22.10    2.10
   4   1  18   22.90    2.20
   5   1 -18    8.60    1.70
   5  -1 -18    9.40    1.80
   5  -1 -18   10.80    1.80
   5   1  18    8.30    1.60
   0  -2 -18   12.80    1.60
   0   2 -18    8.80    1.40
  -1  -2 -18   48.30    2.50
   1   2 -18   47.10    2.50
  -1   2 -18   41.30    2.20
   1  -2 -18   46.20    2.50
   1   2  18   47.00    2.20
  -1   2 -18   49.60    2.50
  -2  -2 -18   20.60    2.00
   2   2 -18   20.50    2.00
   2  -2 -18   17.80    1.90
  -2   2 -18   22.80    2.00
   2   2  18   22.50    1.90
  -2   2 -18   22.60    2.00
   3   2 -18   13.60    1.70
  -3   2 -18   15.30    1.80
  -3   2 -18   13.00    1.70
   3  -2 -18   14.90    1.70
   3   2  18   15.10    1.70
   4   2 -18   40.60    2.60
   4  -2 -18   41.10    2.70
   4   2  18   35.70    2.60
  -4   2 -18   39.30    2.80
   4  -2 -18   36.10    2.40
   5   2 -18   26.90    2.60
   5  -2 -18   27.40    2.40
  -5   2 -18   36.20    3.10
   5  -2 -18   31.90    2.80
   5   2  18   29.10    2.70
   0   3 -18   43.20    2.40
   0  -3 -18   45.30    2.40
   1   3 -18   14.10    1.70
  -1  -3 -18   10.90    1.50
   1  -3 -18   13.10    1.70
  -1   3 -18   11.80    1.40
   1   3  18   12.10    1.40
  -1   3 -18   11.70    1.50
   2   3 -18   16.60    1.90
  -2  -3 -18   15.80    1.90
  -2   3 -18   19.60    1.90
  -2   3 -18   21.10    1.90
   2   3  18   21.40    1.80
   2  -3 -18   23.40    2.10
   3   3 -18   15.60    1.80
  -3   3 -18   13.60    1.60
  -3   3 -18   14.20    1.80
   3  -3 -18   17.60    1.90
   3   3  18   12.90    1.70
   4   3 -18    3.00    1.40
   4   3  18    5.60    1.40
   4  -3 -18    6.30    1.30
   4  -3 -18    8.70    1.60
  -4   3 -18    4.90    1.50
   5   3 -18   78.09    4.40
   5  -3 -18   71.09    3.50
   5  -3 -18   71.59    3.70
   0  -4 -18  157.18    4.80
   0   4 -18  154.08    4.70
  -1  -4 -18   29.20    2.10
   1   4 -18   28.50    2.10
   1   4  18   28.50    1.90
  -1   4 -18   25.40    1.90
   1  -4 -18   27.00    2.10
  -1   4 -18   30.80    2.00
  -2  -4 -18    4.40    1.20
   2   4 -18    3.60    1.20
   2   4  18    3.50    1.20
  -2   4 -18    4.20    1.20
   2  -4 -18    6.00    1.40
  -2   4 -18    3.60    1.20
   3   4 -18   12.00    1.70
   3   4  18   12.00    1.70
  -3   4 -18   12.60    1.50
  -3   4 -18   14.20    1.80
   3  -4 -18   11.80    1.70
   4   4 -18   23.00    2.30
   4   4  18   18.90    2.10
  -4   4 -18   25.40    2.50
   4  -4 -18   24.70    2.20
   4  -4 -18   25.00    2.40
   0   5 -18  128.09    4.20
   0  -5 -18  131.29    4.40
  -1  -5 -18   49.80    2.70
   1   5 -18   52.09    2.80
  -1   5 -18   55.49    2.60
  -1   5 -18   49.50    2.60
   1  -5 -18   55.39    2.70
   1   5  18   50.89    2.50
   2   5 -18   56.69    2.90
   2  -5 -18   55.19    2.70
   2   5  18   56.19    2.80
  -2   5 -18   58.69    2.80
  -2   5 -18   54.59    2.60
   3   5 -18    8.10    1.50
   3   5  18    8.40    1.50
  -3   5 -18   10.60    1.70
   3  -5 -18    8.40    1.40
   4   5 -18   11.80    1.90
  -4   5 -18   12.70    2.00
   4  -5 -18   14.40    2.00
   4   5  18   16.00    2.10
   0   6 -18  137.69    4.40
   0  -6 -18  138.19    4.50
  -1  -6 -18   92.79    3.70
   1   6 -18   93.39    3.70
   1   6  18   91.59    3.40
  -1   6 -18   92.99    3.60
   1  -6 -18   89.59    3.60
  -1   6 -18   91.29    3.50
   2   6 -18   14.60    1.90
   2  -6 -18   17.80    1.90
  -2   6 -18   16.90    1.90
   2   6  18   15.70    1.90
   3   6 -18   -0.10    1.00
  -3   6 -18    1.20    1.20
   3   6  18    3.30    1.20
   4   6 -18   42.40    2.90
  -4   6 -18   44.80    3.00
   4   6  18   43.00    2.90
   4  -6 -18   40.80    3.00
   0  -7 -18    7.40    1.40
   0   7 -18    9.80    1.40
   1   7 -18    7.70    1.50
   1  -7 -18    7.30    1.30
  -1   7 -18    7.40    1.40
   2   7 -18   11.30    1.60
  -2   7 -18   12.80    1.90
   2   7  18   12.60    1.70
   3   7 -18    1.70    1.10
   3   7  18    2.50    1.20
  -3   7 -18    4.50    1.40
   0  -8 -18    1.00    1.00
   1   8 -18    5.50    1.30
   1  -8 -18    2.70    1.20
  -1   8 -18    4.80    1.30
   2   8 -18    9.10    1.60
  -2   8 -18   11.20    1.80
   2   8  18   11.50    1.70
   3   8 -18   -0.20    1.20
   3   8  18   -0.30    1.20
  -3   8 -18    1.70    1.30
  -1   9 -18   11.80    1.80
   2   9 -18   29.30    2.50
   2   9  18   30.20    2.60
  -2   9 -18   24.30    2.40
   0   0 -19    1.00    1.00
  -1   0 -19   29.00    2.10
   1   0 -19   35.20    2.30
  -2   0 -19    3.00    1.20
   2   0 -19    1.60    1.10
   2   0  19    2.50    0.90
  -3   0 -19    1.80    1.10
   3   0  19    3.80    1.20
   3   0 -19    1.30    1.10
   4   0  19    0.10    1.00
   4   0 -19   -0.20    1.00
   0  -1 -19   13.20    1.70
   0   1 -19   12.30    1.60
  -1  -1 -19   14.40    1.80
   1   1 -19   16.10    1.80
   1  -1 -19   12.70    1.70
  -1   1 -19   17.50    1.80
  -2  -1 -19   63.19    3.10
   2   1 -19   72.19    3.20
   2  -1 -19   62.69    3.00
  -2   1 -19   65.09    3.10
  -2   1 -19   67.89    3.00
   2   1  19   69.49    2.90
   3   1 -19    7.70    1.50
  -3  -1 -19    9.30    1.60
  -3   1 -19    7.50    1.50
  -3   1 -19   10.20    1.60
   3  -1 -19    8.50    1.50
   3   1  19    7.40    1.40
   4   1 -19   -0.20    1.20
   4  -1 -19    0.00    1.10
   4   1  19    0.90    1.10
  -4   1 -19    3.40    1.40
   0   2 -19   21.70    2.00
   0  -2 -19   24.50    2.10
  -1  -2 -19    7.50    1.40
   1   2 -19    5.50    1.40
  -1   2 -19    5.40    1.30
   1  -2 -19    9.60    1.50
  -2  -2 -19    2.60    1.20
   2   2 -19    2.30    1.10
  -2   2 -19    1.70    1.10
   2  -2 -19    1.00    1.00
   2   2  19    2.90    1.10
  -2   2 -19    1.20    1.10
   3   2 -19   21.30    2.10
  -3   2 -19   18.80    2.00
   3   2  19   23.90    2.10
  -3   2 -19   20.80    2.20
   3  -2 -19   21.60    2.20
   4   2 -19  125.49    4.70
   4  -2 -19  113.69    4.40
  -4   2 -19  121.39    4.80
   4   2  19  118.69    4.50
   0  -3 -19   33.30    2.20
   0   3 -19   33.30    2.20
  -1  -3 -19   49.00    2.70
   1   3 -19   44.00    2.60
   1  -3 -19   45.80    2.60
  -1   3 -19   46.10    2.50
  -2  -3 -19   44.50    2.70
   2   3 -19   50.69    2.80
   2  -3 -19   46.40    2.60
  -2   3 -19   51.89    2.80
   2   3  19   46.80    2.50
  -2   3 -19   48.20    2.60
   3   3 -19   30.60    2.40
  -3   3 -19   29.20    2.10
   3  -3 -19   34.50    2.30
  -3   3 -19   32.60    2.70
   3   3  19   33.50    2.40
   4   3 -19   94.49    4.10
  -4   3 -19   83.49    4.00
   4   3  19   86.99    3.80
   4  -3 -19   88.19    3.80
   0  -4 -19   87.29    3.50
   0   4 -19   86.79    3.60
  -1  -4 -19    4.30    1.30
   1   4 -19    5.40    1.30
  -1   4 -19    6.20    1.30
   1  -4 -19    5.50    1.30
   2   4 -19   23.10    2.20
  -2  -4 -19   23.90    2.30
   2  -4 -19   22.80    2.10
   2   4  19   27.00    2.00
  -2   4 -19   23.70    2.00
  -2   4 -19   19.50    2.00
   3   4 -19   13.40    1.80
   3  -4 -19   14.20    1.80
  -3   4 -19   20.30    2.20
  -3   4 -19   14.20    1.70
   3   4  19   13.30    1.70
   4   4 -19   37.00    2.70
   4   4  19   46.50    2.90
  -4   4 -19   43.90    3.20
   4  -4 -19   42.10    2.70
   0  -5 -19    2.00    1.20
   0   5 -19    3.40    1.10
  -1  -5 -19   98.59    4.00
   1   5 -19  101.79    3.90
   1  -5 -19  104.89    3.90
  -1   5 -19  103.09    3.80
   2   5 -19   11.90    1.70
   2   5  19   12.60    1.60
  -2   5 -19    8.60    1.40
  -2   5 -19   12.30    1.70
   2  -5 -19   12.70    1.70
   3   5 -19   15.10    2.00
  -3   5 -19   13.30    1.90
   3  -5 -19   16.30    1.90
   3   5  19   16.40    1.90
   4   5 -19  111.89    5.10
   4   5  19  121.99    4.70
  -4   5 -19  123.39    4.90
   0   6 -19    1.50    1.10
   0  -6 -19    0.50    1.00
   1   6 -19    6.10    1.30
  -1  -6 -19    4.00    1.20
   1  -6 -19    7.90    1.40
  -1   6 -19    4.00    1.10
   2   6 -19    3.70    1.30
   2  -6 -19    4.40    1.30
   2   6  19    4.10    1.30
  -2   6 -19    5.90    1.50
   3   6 -19   12.40    1.80
   3   6  19   12.40    1.80
  -3   6 -19   10.60    1.80
   0  -7 -19   18.20    2.00
   0   7 -19   16.40    1.90
   1   7 -19    6.70    1.40
  -1  -7 -19    3.00    1.20
   1  -7 -19    6.00    1.40
   2   7 -19   10.50    1.70
  -2   7 -19   12.10    1.80
   2   7  19    9.70    1.70
   3   7 -19  121.79    4.60
   3   7  19  117.49    4.60
  -3   7 -19  127.79    4.90
   0  -8 -19    7.90    1.50
   1   8 -19    5.80    1.30
   1  -8 -19    5.00    1.30
   2   8 -19    8.40    1.50
   2   8  19    8.00    1.70
  -2   8 -19   11.10    1.80
   0   0 -20    1.20    1.00
  -1   0 -20   72.99    3.30
   1   0 -20   77.59    3.40
   2   0  20   82.89    3.30
   2   0 -20   83.29    3.60
  -2   0 -20   83.79    3.60
   3   0  20   18.40    1.90
  -3   0 -20   19.40    2.10
   3   0 -20   19.20    2.10
   4   0  20   15.00    1.90
   4   0 -20   15.00    2.00
   0   1 -20   45.90    2.70
   0  -1 -20   47.80    2.70
  -1  -1 -20   11.40    1.70
   1   1 -20    8.70    1.50
   1  -1 -20   10.60    1.60
  -1   1 -20   10.40    1.60
   2   1 -20   23.90    2.30
  -2  -1 -20   28.50    2.40
   2   1  20   27.90    2.00
  -2   1 -20   27.90    2.40
  -2   1 -20   25.50    2.20
   2  -1 -20   28.40    2.40
   3   1 -20   58.49    3.10
  -3  -1 -20   53.49    3.00
   3  -1 -20   51.19    3.00
   3   1  20   54.49    2.90
  -3   1 -20   53.19    3.00
  -3   1 -20   58.09    3.00
   4   1 -20   86.89    3.90
   4  -1 -20   90.89    3.90
   4   1  20   84.69    3.80
   0   2 -20    2.70    1.30
   0  -2 -20    3.90    1.20
  -1  -2 -20   21.50    2.10
   1   2 -20   20.30    2.10
  -1   2 -20   22.80    2.10
   1  -2 -20   20.50    2.10
   2   2 -20   67.79    3.30
  -2  -2 -20   65.59    3.30
   2   2  20   63.29    2.90
  -2   2 -20   68.89    3.20
   2  -2 -20   60.89    3.10
  -2   2 -20   68.29    3.10
   3   2 -20    8.70    1.60
   3   2  20    7.60    1.60
   3  -2 -20   11.20    1.70
  -3   2 -20   10.40    1.60
  -3   2 -20    9.70    1.70
   4   2 -20   60.19    3.30
   4   2  20   54.59    3.20
   4  -2 -20   50.49    3.10
  -4   2 -20   54.09    3.30
   0   3 -20    0.80    1.20
   0  -3 -20    2.10    1.20
   1   3 -20   17.10    1.90
  -1  -3 -20   19.30    2.00
   1  -3 -20   12.70    1.70
  -1   3 -20   12.80    1.70
  -2  -3 -20    4.40    1.30
   2   3 -20    7.60    1.60
  -2   3 -20    3.30    1.20
   2   3  20    3.70    1.10
  -2   3 -20    4.50    1.20
   2  -3 -20    4.20    1.30
   3   3 -20  135.59    4.80
   3  -3 -20  130.09    4.60
  -3   3 -20  125.89    4.40
  -3   3 -20  131.59    4.70
   3   3  20  125.79    4.60
   4   3 -20    1.30    1.40
   4   3  20    0.20    1.30
  -4   3 -20   -1.10    1.30
   4  -3 -20   -0.60    1.10
   0  -4 -20    4.00    1.30
   0   4 -20    3.10    1.20
   1   4 -20    2.00    1.10
  -1  -4 -20   -1.00    0.90
  -1   4 -20    1.60    1.00
   1  -4 -20    2.00    1.10
   2   4 -20   -0.50    1.00
  -2  -4 -20   -0.10    1.00
  -2   4 -20    1.40    1.10
  -2   4 -20   -0.70    1.00
   2  -4 -20    0.20    1.00
   2   4  20    0.10    0.90
   3   4 -20   65.29    3.40
  -3   4 -20   60.39    3.30
   3   4  20   61.49    3.20
   3  -4 -20   63.59    3.20
   0   5 -20  203.98    6.00
   0  -5 -20  201.48    6.00
  -1  -5 -20    4.50    1.30
   1   5 -20    3.40    1.30
  -1   5 -20    6.40    1.30
   1  -5 -20    6.30    1.40
   2   5 -20   21.90    2.30
   2  -5 -20   22.30    2.20
  -2   5 -20   18.00    1.90
  -2   5 -20   19.10    2.00
   2   5  20   22.80    2.10
   3   5 -20   43.10    2.90
   3  -5 -20   41.60    2.60
  -3   5 -20   36.40    2.80
   3   5  20   41.30    2.80
   0   6 -20    1.30    1.10
   0  -6 -20    2.50    1.20
   1   6 -20   56.29    3.00
  -1  -6 -20   60.09    3.20
  -1   6 -20   59.79    3.00
   1  -6 -20   56.49    3.00
   2   6 -20    0.90    1.10
   2  -6 -20    1.20    1.00
  -2   6 -20    2.10    1.20
   2   6  20    1.80    1.20
   3   6 -20    7.20    1.60
   3   6  20    4.20    1.40
  -3   6 -20    6.90    1.60
   0   7 -20   25.80    2.30
   0  -7 -20   30.50    2.30
  -1  -7 -20    8.60    1.60
   1   7 -20    9.40    1.60
   1  -7 -20    9.90    1.70
   2   7 -20   13.30    1.90
  -2   7 -20   11.60    1.90
   2   7  20   12.90    1.90
   0  -8 -20   19.80    2.20
   1   8 -20    1.90    1.20
   0   0 -21    0.00    1.00
   1   0 -21    0.10    1.00
  -1   0 -21    0.60    1.00
  -2   0 -21    3.40    1.30
   2   0 -21    1.70    1.10
  -3   0 -21   56.79    3.10
   3   0 -21   56.99    3.20
   3   0  21   53.49    3.00
   0  -1 -21   44.40    2.70
   0   1 -21   47.40    2.80
   1   1 -21   22.80    2.20
  -1  -1 -21   19.40    2.10
  -1   1 -21   22.90    2.20
   1  -1 -21   22.70    2.30
   2   1 -21   15.60    2.00
  -2  -1 -21   14.80    1.90
   2  -1 -21   11.90    1.80
  -2   1 -21   12.90    1.90
   3   1 -21   54.29    3.10
  -3  -1 -21   50.09    3.00
   3  -1 -21   44.10    2.80
   3   1  21   45.10    2.70
  -3   1 -21   45.80    2.80
   0   2 -21   11.40    1.80
   0  -2 -21   10.30    1.70
  -1  -2 -21   18.30    2.00
   1   2 -21   13.70    1.90
   1  -2 -21   15.00    1.90
  -1   2 -21   17.70    1.90
  -2  -2 -21   14.90    1.90
   2   2 -21   15.40    2.00
  -2   2 -21   15.00    1.90
   2  -2 -21   18.30    2.10
  -2   2 -21   17.80    2.20
   3   2 -21   57.79    3.30
   3  -2 -21   64.49    3.30
  -3   2 -21   62.19    3.30
  -3   2 -21   59.39    3.40
   0   3 -21    1.60    1.20
   0  -3 -21    1.60    1.10
   1   3 -21   27.20    2.50
  -1  -3 -21   26.10    2.40
  -1   3 -21   23.90    2.20
   1  -3 -21   27.60    2.50
  -2  -3 -21   63.29    3.30
   2   3 -21   74.59    3.50
  -2   3 -21   69.49    3.40
   2  -3 -21   75.89    3.50
  -2   3 -21   64.79    3.30
   3   3 -21   39.60    2.80
  -3   3 -21   38.30    2.50
  -3   3 -21   42.60    2.80
   3   3  21   41.30    2.80
   3  -3 -21   42.50    2.80
   0  -4 -21    2.60    1.20
   0   4 -21    1.20    1.10
   1   4 -21   46.40    2.80
  -1  -4 -21   45.60    2.80
  -1   4 -21   46.00    2.70
   1  -4 -21   45.10    2.80
  -2  -4 -21   51.99    3.10
   2   4 -21   52.29    3.00
  -2   4 -21   55.59    3.40
   2  -4 -21   53.69    3.10
  -2   4 -21   48.70    2.80
   3   4 -21   13.60    2.00
   3  -4 -21    8.90    1.60
  -3   4 -21    8.10    1.70
   3   4  21    8.70    1.70
   0   5 -21    3.00    1.20
   0  -5 -21    2.50    1.20
  -1  -5 -21   20.60    2.30
   1   5 -21   22.80    2.20
   1  -5 -21   23.40    2.30
  -1   5 -21   22.00    2.20
   2   5 -21    5.70    1.50
   2  -5 -21    2.90    1.20
  -2   5 -21    5.50    1.60
   0   6 -21   55.59    3.10
   0  -6 -21   53.19    3.00
   1   6 -21   31.00    2.40
  -1  -6 -21   28.60    2.50
  -1   6 -21   28.60    2.20
   1  -6 -21   35.10    2.60
   2   6 -21    1.50    1.20
   2  -6 -21    4.50    1.30
   0   7 -21   43.60    2.80
   0  -7 -21   40.80    2.70
   1   7 -21    5.30    1.40
   1  -7 -21    2.90    1.20
   0   0 -22  270.07    7.50
  -1   0 -22   20.60    2.30
   1   0 -22   14.80    2.00
   2   0 -22   14.00    2.00
  -2   0 -22   16.60    2.10
   3   0 -22   -1.10    1.10
  -3   0 -22   -0.10    1.10
   3   0  22   -1.80    1.10
   0  -1 -22    0.80    1.20
   0   1 -22   -0.10    1.10
  -1  -1 -22   58.99    3.20
   1   1 -22   68.09    3.50
   1  -1 -22   65.69    3.40
  -1   1 -22   67.49    3.30
   2   1 -22   12.30    1.90
  -2  -1 -22   16.30    2.00
   2  -1 -22   15.10    2.00
  -2   1 -22   17.00    2.10
   3   1 -22   17.50    2.60
   3  -1  22   24.00    2.30
   3   1  22   19.00    2.10
   3  -1 -22   24.50    2.50
  -3   1 -22   18.70    2.10
   0   2 -22   26.00    2.40
   0  -2 -22   27.10    2.50
  -1  -2 -22    3.00    1.20
   1   2 -22    4.80    1.40
   1  -2 -22    3.40    1.40
  -1   2 -22    4.10    1.40
   2   2 -22   11.30    1.80
  -2  -2 -22   11.70    1.80
   2  -2 -22   15.20    2.00
  -2   2 -22    9.20    1.60
   0  -3 -22    5.30    1.50
   0   3 -22    3.50    1.50
   1   3 -22   65.09    3.40
  -1  -3 -22   58.99    3.30
  -1   3 -22   59.99    3.20
   1  -3 -22   66.89    3.40
   2   3 -22   38.30    2.80
  -2  -3 -22   45.10    2.90
   2  -3 -22   46.80    2.90
  -2   3 -22   43.20    2.70
   0   4 -22  122.09    4.60
   0  -4 -22  124.39    4.70
  -1  -4 -22  105.89    4.40
   1   4 -22  105.69    4.40
  -1   4 -22  104.19    4.20
   1  -4 -22  103.19    4.30
  -2  -4 -22   57.99    3.50
   2   4 -22   56.29    3.30
   2  -4 -22   59.49    3.20
  -2   4 -22   59.09    3.20
   0   5 -22   10.00    1.60
   0  -5 -22   13.90    2.00
  -1  -5 -22   16.70    2.20
   1   5 -22   11.40    1.90
   1  -5 -22   12.80    1.90
  -1   5 -22   12.20    1.80
   0   6 -22   31.00    2.60
   0  -6 -22   24.30    2.40
   0   0 -23    0.70    1.10
   1   0 -23   49.40    3.30
  -1   0 -23   50.49    3.20
  -2   0 -23   -0.10    1.10
   2   0 -23    1.00    1.40
   0  -1 -23   67.89    3.50
   0   1 -23   65.39    3.50
  -1  -1 -23   13.10    1.90
   1   1 -23   15.10    2.00
  -1   1 -23   13.10    1.90
   1  -1 -23   13.90    2.00
  -2  -1 -23    1.90    1.50
   2  -1 -23    2.10    1.40
  -2   1 -23    0.50    1.10
   0   2 -23   45.30    3.00
   0  -2 -23   47.60    3.00
   1   2 -23   66.69    3.50
  -1  -2 -23   68.39    3.50
  -1   2 -23   71.19    3.50
   1  -2 -23   66.89    3.50
   2  -2 -23   89.29    4.70
  -2   2 -23   86.09    3.90
   0   3 -23    8.90    1.80
   0  -3 -23   11.10    1.90
  -1  -3 -23    6.30    1.70
   1   3 -23    1.90    1.40
   1  -3 -23    4.20    1.40
  -1   3 -23    4.30    1.40
   0  -4 -23   54.69    3.20
   0   4 -23   53.69    3.20
   0   0   0    0.00    0.00

_computing_structure_solution     'SHELXT 2014/5 (Sheldrick, 2014)'
;
_shelx_hkl_checksum   54728


data_3
 
_audit_creation_method            'SHELXL-2014/7'
_shelx_SHELXL_version_number      '2014/7'
_chemical_name_systematic         ?
_chemical_name_common             ?
_chemical_melting_point           ?
_chemical_formula_moiety          ?
_chemical_formula_sum
 'C16 H29 N' 
_chemical_formula_weight          235.40

loop_
 _atom_type_symbol
 _atom_type_description
 _atom_type_scat_dispersion_real
 _atom_type_scat_dispersion_imag
 _atom_type_scat_source
 'C'  'C'   0.0033   0.0016
 'International Tables Vol C Tables 4.2.6.8 and 6.1.1.4'
 'H'  'H'   0.0000   0.0000
 'International Tables Vol C Tables 4.2.6.8 and 6.1.1.4'
 'N'  'N'   0.0061   0.0033
 'International Tables Vol C Tables 4.2.6.8 and 6.1.1.4'
 
_space_group_crystal_system       monoclinic
_space_group_IT_number            14
_space_group_name_H-M_alt         'P 21/n'
_space_group_name_Hall            '-P 2yn'
 
_shelx_space_group_comment
;
The symmetry employed for this shelxl refinement is uniquely defined
by the following loop, which should always be used as a source of
symmetry information in preference to the above space-group names.
They are only intended as comments.
;
 
loop_
 _space_group_symop_operation_xyz
 'x, y, z'
 '-x+1/2, y+1/2, -z+1/2'
 '-x, -y, -z'
 'x-1/2, -y-1/2, z-1/2'
 
_cell_length_a                    8.3640(11)
_cell_length_b                    31.759(4)
_cell_length_c                    10.5541(14)
_cell_angle_alpha                 90
_cell_angle_beta                  92.253(2)
_cell_angle_gamma                 90
_cell_volume                      2801.4(6)
_cell_formula_units_Z             8
_cell_measurement_temperature     173(2)
_cell_measurement_reflns_used      3287
_cell_measurement_theta_min        2.52
_cell_measurement_theta_max       26.84
 
_exptl_crystal_description        needle
_exptl_crystal_colour             colorless
_exptl_crystal_density_meas       ?
_exptl_crystal_density_method     ?
_exptl_crystal_density_diffrn     1.116          
_exptl_crystal_F_000              1056
_exptl_transmission_factor_min    ?
_exptl_transmission_factor_max    ?
_exptl_crystal_size_max           0.080
_exptl_crystal_size_mid           0.040
_exptl_crystal_size_min           0.020
_exptl_absorpt_coefficient_mu     0.063
_shelx_estimated_absorpt_T_min    0.995
_shelx_estimated_absorpt_T_max    0.999
_exptl_absorpt_correction_type    multi-scan
_exptl_absorpt_correction_T_min   0.913
_exptl_absorpt_correction_T_max   0.999
_exptl_absorpt_process_details         
;
 SADABS (Sheldrick, 2014)
;

_exptl_special_details
;
 ?
;

_diffrn_ambient_temperature       173(2)
_diffrn_radiation_wavelength      0.71073
_diffrn_radiation_type            MoK\a
_diffrn_radiation_source          'Bruker TXS fine-focus rotating anode'
_diffrn_radiation_monochromator   'Bruker Helios multilayered confocal mirror'
_diffrn_measurement_device_type   'Bruker APEX-II CCD'
_diffrn_measurement_method        '\f and \w scans'
_diffrn_detector_area_resol_mean  ?
_diffrn_reflns_number             16980
_diffrn_reflns_av_unetI/netI      0.0539
_diffrn_reflns_av_R_equivalents   0.0362
_diffrn_reflns_limit_h_min        -10
_diffrn_reflns_limit_h_max        11
_diffrn_reflns_limit_k_min        -28
_diffrn_reflns_limit_k_max        43
_diffrn_reflns_limit_l_min        -13
_diffrn_reflns_limit_l_max        14
_diffrn_reflns_theta_min          2.035
_diffrn_reflns_theta_max          29.240
_diffrn_reflns_theta_full         25.242
_diffrn_measured_fraction_theta_max   0.919
_diffrn_measured_fraction_theta_full  0.999
_diffrn_reflns_Laue_measured_fraction_max    0.919
_diffrn_reflns_Laue_measured_fraction_full   0.999
_diffrn_reflns_point_group_measured_fraction_max   0.919
_diffrn_reflns_point_group_measured_fraction_full  0.999
_reflns_number_total              7014
_reflns_number_gt                 4684
_reflns_threshold_expression      'I > 2\s(I)'
_reflns_Friedel_coverage          0.000
_reflns_Friedel_fraction_max      .
_reflns_Friedel_fraction_full     .
 
_reflns_special_details
;
 Reflections were merged by SHELXL according to the crystal
 class for the calculation of statistics and refinement.
 
 _reflns_Friedel_fraction is defined as the number of unique
 Friedel pairs measured divided by the number that would be
 possible theoretically, ignoring centric projections and
 systematic absences.
;
 
_computing_data_collection        'Bruker APEX2'
_computing_cell_refinement        'Bruker SAINT'
_computing_data_reduction         'Bruker SAINT'
_computing_structure_solution     ?
_computing_structure_refinement 'SHELXL-2014/7 (Sheldrick, 2014)'
_computing_molecular_graphics     ?
_computing_publication_material   ?
_refine_special_details           ?
_refine_ls_structure_factor_coef  Fsqd
_refine_ls_matrix_type            full
_refine_ls_weighting_scheme       calc
_refine_ls_weighting_details
'w=1/[\s^2^(Fo^2^)+(0.0668P)^2^+0.8110P] where P=(Fo^2^+2Fc^2^)/3'
_atom_sites_solution_primary      ?
_atom_sites_solution_secondary    ?
_atom_sites_solution_hydrogens    geom
_refine_ls_hydrogen_treatment     constr
_refine_ls_extinction_method      none
_refine_ls_extinction_coef        .
_refine_ls_number_reflns          7014
_refine_ls_number_parameters      309
_refine_ls_number_restraints      0
_refine_ls_R_factor_all           0.0971
_refine_ls_R_factor_gt            0.0580
_refine_ls_wR_factor_ref          0.1518
_refine_ls_wR_factor_gt           0.1338
_refine_ls_goodness_of_fit_ref    1.019
_refine_ls_restrained_S_all       1.019
_refine_ls_shift/su_max           0.001
_refine_ls_shift/su_mean          0.000
 
loop_
 _atom_site_label
 _atom_site_type_symbol
 _atom_site_fract_x
 _atom_site_fract_y
 _atom_site_fract_z
 _atom_site_U_iso_or_equiv
 _atom_site_adp_type
 _atom_site_occupancy
 _atom_site_site_symmetry_order  
 _atom_site_calc_flag
 _atom_site_refinement_flags_posn
 _atom_site_refinement_flags_adp
 _atom_site_refinement_flags_occupancy
 _atom_site_disorder_assembly
 _atom_site_disorder_group
N1 N 1.03781(16) 0.46445(4) 0.19918(13) 0.0258(3) Uani 1 1 d . . . . .
C1 C 0.86445(19) 0.47320(5) 0.22075(15) 0.0219(3) Uani 1 1 d . . . . .
C3 C 0.8217(2) 0.39419(5) 0.21626(19) 0.0326(4) Uani 1 1 d . . . . .
H3A H 0.8132 0.3932 0.3095 0.039 Uiso 1 1 calc R U . . .
H3B H 0.7541 0.3715 0.1786 0.039 Uiso 1 1 calc R U . . .
N2 N 0.38689(15) 0.71672(4) 0.20970(13) 0.0208(3) Uani 1 1 d . . . . .
C2 C 0.7649(2) 0.43653(5) 0.16636(18) 0.0304(4) Uani 1 1 d . . . . .
H2A H 0.6517 0.4406 0.1878 0.037 Uiso 1 1 calc R U . . .
H2B H 0.7699 0.4367 0.0728 0.037 Uiso 1 1 calc R U . . .
C4 C 0.9930(2) 0.38779(5) 0.18212(18) 0.0316(4) Uani 1 1 d . . . . .
H4A H 0.9979 0.3866 0.0886 0.038 Uiso 1 1 calc R U . . .
H4B H 1.0302 0.3603 0.2161 0.038 Uiso 1 1 calc R U . . .
C5 C 1.10778(19) 0.42223(5) 0.23226(15) 0.0219(3) Uani 1 1 d . . . . .
C7 C 0.6560(2) 0.49562(6) 0.38167(18) 0.0337(4) Uani 1 1 d . . . . .
H7A H 0.5813 0.4722 0.3615 0.040 Uiso 1 1 calc R U . . .
H7B H 0.6458 0.5030 0.4722 0.040 Uiso 1 1 calc R U . . .
C6 C 0.8266(2) 0.48107(6) 0.36086(16) 0.0267(4) Uani 1 1 d . . . . .
H6A H 0.8462 0.4547 0.4091 0.032 Uiso 1 1 calc R U . . .
H6B H 0.9016 0.5026 0.3960 0.032 Uiso 1 1 calc R U . . .
C8 C 0.6090(2) 0.53345(6) 0.3005(2) 0.0395(5) Uani 1 1 d . . . . .
H8A H 0.6718 0.5583 0.3298 0.047 Uiso 1 1 calc R U . . .
H8B H 0.4943 0.5398 0.3104 0.047 Uiso 1 1 calc R U . . .
C9 C 0.6389(2) 0.52522(6) 0.16144(19) 0.0363(4) Uani 1 1 d . . . . .
H9A H 0.6129 0.5508 0.1112 0.044 Uiso 1 1 calc R U . . .
H9B H 0.5683 0.5022 0.1298 0.044 Uiso 1 1 calc R U . . .
C10 C 0.8145(2) 0.51307(6) 0.14456(18) 0.0328(4) Uani 1 1 d . . . . .
H10A H 0.8840 0.5368 0.1724 0.039 Uiso 1 1 calc R U . . .
H10B H 0.8314 0.5081 0.0535 0.039 Uiso 1 1 calc R U . . .
C11 C 1.2639(2) 0.41702(6) 0.16020(18) 0.0346(4) Uani 1 1 d . . . . .
H11A H 1.2380 0.4185 0.0680 0.041 Uiso 1 1 calc R U . . .
H11B H 1.3362 0.4408 0.1823 0.041 Uiso 1 1 calc R U . . .
C12 C 1.3516(2) 0.37571(6) 0.18934(18) 0.0349(4) Uani 1 1 d . . . . .
H12A H 1.2839 0.3518 0.1601 0.042 Uiso 1 1 calc R U . . .
H12B H 1.4518 0.3749 0.1425 0.042 Uiso 1 1 calc R U . . .
C13 C 1.3909(2) 0.37116(7) 0.33020(19) 0.0392(5) Uani 1 1 d . . . . .
H13A H 1.4700 0.3929 0.3571 0.047 Uiso 1 1 calc R U . . .
H13B H 1.4397 0.3432 0.3468 0.047 Uiso 1 1 calc R U . . .
C14 C 1.2422(2) 0.37575(6) 0.40742(18) 0.0362(4) Uani 1 1 d . . . . .
H14A H 1.2743 0.3761 0.4987 0.043 Uiso 1 1 calc R U . . .
H14B H 1.1722 0.3510 0.3919 0.043 Uiso 1 1 calc R U . . .
C15 C 1.1475(2) 0.41580(5) 0.37512(16) 0.0264(4) Uani 1 1 d . . . . .
H15A H 1.2097 0.4404 0.4071 0.032 Uiso 1 1 calc R U . . .
H15B H 1.0461 0.4151 0.4204 0.032 Uiso 1 1 calc R U . . .
C16 C 1.1428(2) 0.49989(5) 0.23639(19) 0.0318(4) Uani 1 1 d . . . . .
H16A H 1.2544 0.4922 0.2235 0.048 Uiso 1 1 calc R U . . .
H16B H 1.1295 0.5065 0.3260 0.048 Uiso 1 1 calc R U . . .
H16C H 1.1144 0.5246 0.1845 0.048 Uiso 1 1 calc R U . . .
C17 C 0.32014(18) 0.67321(5) 0.22419(15) 0.0207(3) Uani 1 1 d . . . . .
C18 C 0.42061(19) 0.64240(5) 0.14897(16) 0.0255(4) Uani 1 1 d . . . . .
H18A H 0.3854 0.6133 0.1669 0.031 Uiso 1 1 calc R U . . .
H18B H 0.4006 0.6477 0.0573 0.031 Uiso 1 1 calc R U . . .
C19 C 0.5989(2) 0.64587(5) 0.17976(19) 0.0312(4) Uani 1 1 d . . . . .
H19A H 0.6218 0.6390 0.2702 0.037 Uiso 1 1 calc R U . . .
H19B H 0.6581 0.6258 0.1273 0.037 Uiso 1 1 calc R U . . .
C20 C 0.65135(19) 0.69036(5) 0.15262(17) 0.0276(4) Uani 1 1 d . . . . .
H20A H 0.6333 0.6961 0.0610 0.033 Uiso 1 1 calc R U . . .
H20B H 0.7677 0.6928 0.1725 0.033 Uiso 1 1 calc R U . . .
C21 C 0.56375(18) 0.72383(5) 0.22793(14) 0.0201(3) Uani 1 1 d . . . . .
C22 C 0.3098(2) 0.65873(6) 0.36351(16) 0.0297(4) Uani 1 1 d . . . . .
H22A H 0.4198 0.6547 0.3997 0.036 Uiso 1 1 calc R U . . .
H22B H 0.2594 0.6814 0.4124 0.036 Uiso 1 1 calc R U . . .
C23 C 0.2152(2) 0.61794(6) 0.38090(18) 0.0373(5) Uani 1 1 d . . . . .
H23A H 0.2746 0.5942 0.3444 0.045 Uiso 1 1 calc R U . . .
H23B H 0.2056 0.6124 0.4726 0.045 Uiso 1 1 calc R U . . .
C24 C 0.0491(2) 0.62006(6) 0.31799(18) 0.0356(4) Uani 1 1 d . . . . .
H24A H -0.0050 0.5925 0.3263 0.043 Uiso 1 1 calc R U . . .
H24B H -0.0153 0.6416 0.3607 0.043 Uiso 1 1 calc R U . . .
C25 C 0.0602(2) 0.63114(6) 0.17895(17) 0.0309(4) Uani 1 1 d . . . . .
H25A H -0.0488 0.6334 0.1395 0.037 Uiso 1 1 calc R U . . .
H25B H 0.1173 0.6084 0.1351 0.037 Uiso 1 1 calc R U . . .
C26 C 0.14910(19) 0.67292(5) 0.16264(16) 0.0255(4) Uani 1 1 d . . . . .
H26A H 0.0863 0.6958 0.2005 0.031 Uiso 1 1 calc R U . . .
H26B H 0.1557 0.6789 0.0710 0.031 Uiso 1 1 calc R U . . .
C27 C 0.6045(2) 0.76698(5) 0.16871(17) 0.0278(4) Uani 1 1 d . . . . .
H27A H 0.5755 0.7661 0.0769 0.033 Uiso 1 1 calc R U . . .
H27B H 0.5382 0.7890 0.2074 0.033 Uiso 1 1 calc R U . . .
C28 C 0.7807(2) 0.77931(6) 0.18611(17) 0.0308(4) Uani 1 1 d . . . . .
H28A H 0.8475 0.7589 0.1410 0.037 Uiso 1 1 calc R U . . .
H28B H 0.7973 0.8075 0.1489 0.037 Uiso 1 1 calc R U . . .
C29 C 0.8315(2) 0.77998(6) 0.32612(17) 0.0312(4) Uani 1 1 d . . . . .
H29A H 0.9473 0.7863 0.3351 0.037 Uiso 1 1 calc R U . . .
H29B H 0.7730 0.8027 0.3691 0.037 Uiso 1 1 calc R U . . .
C30 C 0.7981(2) 0.73825(6) 0.38957(17) 0.0315(4) Uani 1 1 d . . . . .
H30A H 0.8229 0.7408 0.4818 0.038 Uiso 1 1 calc R U . . .
H30B H 0.8693 0.7164 0.3556 0.038 Uiso 1 1 calc R U . . .
C31 C 0.6236(2) 0.72434(5) 0.36838(16) 0.0263(4) Uani 1 1 d . . . . .
H31A H 0.5545 0.7435 0.4160 0.032 Uiso 1 1 calc R U . . .
H31B H 0.6116 0.6957 0.4039 0.032 Uiso 1 1 calc R U . . .
C32 C 0.2900(2) 0.74954(5) 0.26724(19) 0.0321(4) Uani 1 1 d . . . . .
H32A H 0.2196 0.7625 0.2018 0.048 Uiso 1 1 calc R U . . .
H32B H 0.3605 0.7711 0.3056 0.048 Uiso 1 1 calc R U . . .
H32C H 0.2251 0.7370 0.3327 0.048 Uiso 1 1 calc R U . . .
 
loop_
 _atom_site_aniso_label
 _atom_site_aniso_U_11
 _atom_site_aniso_U_22
 _atom_site_aniso_U_33
 _atom_site_aniso_U_23
 _atom_site_aniso_U_13
 _atom_site_aniso_U_12
N1 0.0270(7) 0.0208(7) 0.0298(8) 0.0030(6) 0.0057(6) 0.0006(6)
C1 0.0230(8) 0.0186(8) 0.0242(8) 0.0009(6) 0.0026(6) 0.0006(6)
C3 0.0317(9) 0.0219(9) 0.0436(11) -0.0037(7) -0.0046(8) -0.0046(7)
N2 0.0176(6) 0.0196(7) 0.0251(7) 0.0019(5) 0.0013(5) 0.0024(5)
C2 0.0279(9) 0.0284(9) 0.0347(10) -0.0050(7) -0.0022(7) 0.0021(7)
C4 0.0370(10) 0.0230(9) 0.0346(10) -0.0032(7) -0.0030(8) 0.0037(7)
C5 0.0241(8) 0.0193(8) 0.0226(8) 0.0011(6) 0.0035(6) 0.0021(6)
C7 0.0317(10) 0.0371(10) 0.0330(10) -0.0024(8) 0.0090(8) 0.0066(8)
C6 0.0281(9) 0.0270(9) 0.0254(9) 0.0006(7) 0.0039(7) 0.0030(7)
C8 0.0349(10) 0.0357(11) 0.0485(13) -0.0010(9) 0.0090(9) 0.0112(8)
C9 0.0369(10) 0.0316(10) 0.0405(11) 0.0070(8) 0.0013(8) 0.0117(8)
C10 0.0378(10) 0.0280(9) 0.0327(10) 0.0055(7) 0.0048(8) 0.0048(8)
C11 0.0364(10) 0.0353(10) 0.0329(10) 0.0024(8) 0.0117(8) 0.0073(8)
C12 0.0321(10) 0.0362(11) 0.0370(11) -0.0006(8) 0.0093(8) 0.0104(8)
C13 0.0347(10) 0.0418(11) 0.0412(12) 0.0031(9) 0.0004(8) 0.0151(9)
C14 0.0377(11) 0.0400(11) 0.0307(10) 0.0063(8) 0.0014(8) 0.0110(8)
C15 0.0262(9) 0.0285(9) 0.0247(9) 0.0007(7) 0.0022(7) 0.0046(7)
C16 0.0281(9) 0.0226(9) 0.0453(11) 0.0024(8) 0.0075(8) -0.0031(7)
C17 0.0212(8) 0.0218(8) 0.0192(8) 0.0011(6) 0.0016(6) 0.0004(6)
C18 0.0232(8) 0.0254(9) 0.0279(9) -0.0051(7) 0.0022(7) -0.0006(7)
C19 0.0218(8) 0.0266(9) 0.0453(11) -0.0086(8) 0.0010(7) 0.0038(7)
C20 0.0192(8) 0.0324(9) 0.0315(9) -0.0075(7) 0.0029(7) -0.0010(7)
C21 0.0197(8) 0.0226(8) 0.0178(8) 0.0004(6) -0.0022(6) 0.0003(6)
C22 0.0342(10) 0.0334(10) 0.0214(9) 0.0049(7) 0.0007(7) -0.0057(8)
C23 0.0457(12) 0.0367(11) 0.0296(10) 0.0086(8) 0.0040(8) -0.0097(9)
C24 0.0354(10) 0.0329(10) 0.0393(11) -0.0021(8) 0.0136(8) -0.0099(8)
C25 0.0222(9) 0.0355(10) 0.0351(10) -0.0043(8) 0.0025(7) -0.0029(7)
C26 0.0197(8) 0.0307(9) 0.0260(9) 0.0008(7) 0.0010(6) 0.0007(7)
C27 0.0264(9) 0.0290(9) 0.0276(9) 0.0071(7) -0.0043(7) -0.0030(7)
C28 0.0297(9) 0.0324(10) 0.0302(10) 0.0025(7) -0.0009(7) -0.0091(8)
C29 0.0308(9) 0.0311(10) 0.0310(10) -0.0045(7) -0.0060(7) -0.0064(7)
C30 0.0318(10) 0.0349(10) 0.0270(9) -0.0005(7) -0.0101(7) -0.0007(8)
C31 0.0281(9) 0.0280(9) 0.0223(9) 0.0020(7) -0.0031(7) -0.0024(7)
C32 0.0252(9) 0.0251(9) 0.0461(11) -0.0029(8) 0.0052(8) 0.0037(7)
 
_geom_special_details
;
 All esds (except the esd in the dihedral angle between two l.s. planes)
 are estimated using the full covariance matrix.  The cell esds are taken
 into account individually in the estimation of esds in distances, angles
 and torsion angles; correlations between esds in cell parameters are only
 used when they are defined by crystal symmetry.  An approximate (isotropic)
 treatment of cell esds is used for estimating esds involving l.s. planes.
;
 
loop_
 _geom_bond_atom_site_label_1
 _geom_bond_atom_site_label_2
 _geom_bond_distance
 _geom_bond_site_symmetry_2
 _geom_bond_publ_flag
N1 C16 1.472(2) . ?
N1 C5 1.499(2) . ?
N1 C1 1.503(2) . ?
C1 C2 1.530(2) . ?
C1 C6 1.545(2) . ?
C1 C10 1.549(2) . ?
C3 C4 1.505(3) . ?
C3 C2 1.514(2) . ?
C3 H3A 0.9900 . ?
C3 H3B 0.9900 . ?
N2 C32 1.467(2) . ?
N2 C17 1.501(2) . ?
N2 C21 1.5013(19) . ?
C2 H2A 0.9900 . ?
C2 H2B 0.9900 . ?
C4 C5 1.535(2) . ?
C4 H4A 0.9900 . ?
C4 H4B 0.9900 . ?
C5 C15 1.545(2) . ?
C5 C11 1.545(2) . ?
C7 C8 1.518(3) . ?
C7 C6 1.524(2) . ?
C7 H7A 0.9900 . ?
C7 H7B 0.9900 . ?
C6 H6A 0.9900 . ?
C6 H6B 0.9900 . ?
C8 C9 1.521(3) . ?
C8 H8A 0.9900 . ?
C8 H8B 0.9900 . ?
C9 C10 1.536(3) . ?
C9 H9A 0.9900 . ?
C9 H9B 0.9900 . ?
C10 H10A 0.9900 . ?
C10 H10B 0.9900 . ?
C11 C12 1.529(2) . ?
C11 H11A 0.9900 . ?
C11 H11B 0.9900 . ?
C12 C13 1.517(3) . ?
C12 H12A 0.9900 . ?
C12 H12B 0.9900 . ?
C13 C14 1.521(3) . ?
C13 H13A 0.9900 . ?
C13 H13B 0.9900 . ?
C14 C15 1.530(2) . ?
C14 H14A 0.9900 . ?
C14 H14B 0.9900 . ?
C15 H15A 0.9900 . ?
C15 H15B 0.9900 . ?
C16 H16A 0.9800 . ?
C16 H16B 0.9800 . ?
C16 H16C 0.9800 . ?
C17 C18 1.532(2) . ?
C17 C22 1.546(2) . ?
C17 C26 1.548(2) . ?
C18 C19 1.518(2) . ?
C18 H18A 0.9900 . ?
C18 H18B 0.9900 . ?
C19 C20 1.510(2) . ?
C19 H19A 0.9900 . ?
C19 H19B 0.9900 . ?
C20 C21 1.531(2) . ?
C20 H20A 0.9900 . ?
C20 H20B 0.9900 . ?
C21 C31 1.546(2) . ?
C21 C27 1.549(2) . ?
C22 C23 1.533(2) . ?
C22 H22A 0.9900 . ?
C22 H22B 0.9900 . ?
C23 C24 1.517(3) . ?
C23 H23A 0.9900 . ?
C23 H23B 0.9900 . ?
C24 C25 1.516(3) . ?
C24 H24A 0.9900 . ?
C24 H24B 0.9900 . ?
C25 C26 1.534(2) . ?
C25 H25A 0.9900 . ?
C25 H25B 0.9900 . ?
C26 H26A 0.9900 . ?
C26 H26B 0.9900 . ?
C27 C28 1.529(2) . ?
C27 H27A 0.9900 . ?
C27 H27B 0.9900 . ?
C28 C29 1.522(2) . ?
C28 H28A 0.9900 . ?
C28 H28B 0.9900 . ?
C29 C30 1.516(3) . ?
C29 H29A 0.9900 . ?
C29 H29B 0.9900 . ?
C30 C31 1.533(2) . ?
C30 H30A 0.9900 . ?
C30 H30B 0.9900 . ?
C31 H31A 0.9900 . ?
C31 H31B 0.9900 . ?
C32 H32A 0.9800 . ?
C32 H32B 0.9800 . ?
C32 H32C 0.9800 . ?
 
loop_
 _geom_angle_atom_site_label_1
 _geom_angle_atom_site_label_2
 _geom_angle_atom_site_label_3
 _geom_angle
 _geom_angle_site_symmetry_1
 _geom_angle_site_symmetry_3
 _geom_angle_publ_flag
C16 N1 C5 113.51(13) . . ?
C16 N1 C1 112.78(13) . . ?
C5 N1 C1 120.04(12) . . ?
N1 C1 C2 108.45(13) . . ?
N1 C1 C6 114.23(13) . . ?
C2 C1 C6 110.68(14) . . ?
N1 C1 C10 108.35(13) . . ?
C2 C1 C10 107.21(14) . . ?
C6 C1 C10 107.68(13) . . ?
C4 C3 C2 109.01(15) . . ?
C4 C3 H3A 109.9 . . ?
C2 C3 H3A 109.9 . . ?
C4 C3 H3B 109.9 . . ?
C2 C3 H3B 109.9 . . ?
H3A C3 H3B 108.3 . . ?
C32 N2 C17 113.48(12) . . ?
C32 N2 C21 113.45(13) . . ?
C17 N2 C21 119.62(12) . . ?
C3 C2 C1 112.74(14) . . ?
C3 C2 H2A 109.0 . . ?
C1 C2 H2A 109.0 . . ?
C3 C2 H2B 109.0 . . ?
C1 C2 H2B 109.0 . . ?
H2A C2 H2B 107.8 . . ?
C3 C4 C5 114.17(14) . . ?
C3 C4 H4A 108.7 . . ?
C5 C4 H4A 108.7 . . ?
C3 C4 H4B 108.7 . . ?
C5 C4 H4B 108.7 . . ?
H4A C4 H4B 107.6 . . ?
N1 C5 C4 108.90(13) . . ?
N1 C5 C15 114.37(13) . . ?
C4 C5 C15 110.48(14) . . ?
N1 C5 C11 108.11(13) . . ?
C4 C5 C11 106.43(14) . . ?
C15 C5 C11 108.23(14) . . ?
C8 C7 C6 112.45(15) . . ?
C8 C7 H7A 109.1 . . ?
C6 C7 H7A 109.1 . . ?
C8 C7 H7B 109.1 . . ?
C6 C7 H7B 109.1 . . ?
H7A C7 H7B 107.8 . . ?
C7 C6 C1 114.54(14) . . ?
C7 C6 H6A 108.6 . . ?
C1 C6 H6A 108.6 . . ?
C7 C6 H6B 108.6 . . ?
C1 C6 H6B 108.6 . . ?
H6A C6 H6B 107.6 . . ?
C7 C8 C9 111.07(15) . . ?
C7 C8 H8A 109.4 . . ?
C9 C8 H8A 109.4 . . ?
C7 C8 H8B 109.4 . . ?
C9 C8 H8B 109.4 . . ?
H8A C8 H8B 108.0 . . ?
C8 C9 C10 110.42(16) . . ?
C8 C9 H9A 109.6 . . ?
C10 C9 H9A 109.6 . . ?
C8 C9 H9B 109.6 . . ?
C10 C9 H9B 109.6 . . ?
H9A C9 H9B 108.1 . . ?
C9 C10 C1 112.62(15) . . ?
C9 C10 H10A 109.1 . . ?
C1 C10 H10A 109.1 . . ?
C9 C10 H10B 109.1 . . ?
C1 C10 H10B 109.1 . . ?
H10A C10 H10B 107.8 . . ?
C12 C11 C5 113.64(15) . . ?
C12 C11 H11A 108.8 . . ?
C5 C11 H11A 108.8 . . ?
C12 C11 H11B 108.8 . . ?
C5 C11 H11B 108.8 . . ?
H11A C11 H11B 107.7 . . ?
C13 C12 C11 111.28(16) . . ?
C13 C12 H12A 109.4 . . ?
C11 C12 H12A 109.4 . . ?
C13 C12 H12B 109.4 . . ?
C11 C12 H12B 109.4 . . ?
H12A C12 H12B 108.0 . . ?
C12 C13 C14 111.45(16) . . ?
C12 C13 H13A 109.3 . . ?
C14 C13 H13A 109.3 . . ?
C12 C13 H13B 109.3 . . ?
C14 C13 H13B 109.3 . . ?
H13A C13 H13B 108.0 . . ?
C13 C14 C15 112.80(16) . . ?
C13 C14 H14A 109.0 . . ?
C15 C14 H14A 109.0 . . ?
C13 C14 H14B 109.0 . . ?
C15 C14 H14B 109.0 . . ?
H14A C14 H14B 107.8 . . ?
C14 C15 C5 114.64(14) . . ?
C14 C15 H15A 108.6 . . ?
C5 C15 H15A 108.6 . . ?
C14 C15 H15B 108.6 . . ?
C5 C15 H15B 108.6 . . ?
H15A C15 H15B 107.6 . . ?
N1 C16 H16A 109.5 . . ?
N1 C16 H16B 109.5 . . ?
H16A C16 H16B 109.5 . . ?
N1 C16 H16C 109.5 . . ?
H16A C16 H16C 109.5 . . ?
H16B C16 H16C 109.5 . . ?
N2 C17 C18 108.76(13) . . ?
N2 C17 C22 113.93(13) . . ?
C18 C17 C22 110.80(14) . . ?
N2 C17 C26 107.70(12) . . ?
C18 C17 C26 107.19(13) . . ?
C22 C17 C26 108.19(13) . . ?
C19 C18 C17 113.39(13) . . ?
C19 C18 H18A 108.9 . . ?
C17 C18 H18A 108.9 . . ?
C19 C18 H18B 108.9 . . ?
C17 C18 H18B 108.9 . . ?
H18A C18 H18B 107.7 . . ?
C20 C19 C18 108.53(14) . . ?
C20 C19 H19A 110.0 . . ?
C18 C19 H19A 110.0 . . ?
C20 C19 H19B 110.0 . . ?
C18 C19 H19B 110.0 . . ?
H19A C19 H19B 108.4 . . ?
C19 C20 C21 113.75(14) . . ?
C19 C20 H20A 108.8 . . ?
C21 C20 H20A 108.8 . . ?
C19 C20 H20B 108.8 . . ?
C21 C20 H20B 108.8 . . ?
H20A C20 H20B 107.7 . . ?
N2 C21 C20 108.55(12) . . ?
N2 C21 C31 113.87(13) . . ?
C20 C21 C31 111.18(13) . . ?
N2 C21 C27 108.21(12) . . ?
C20 C21 C27 106.70(14) . . ?
C31 C21 C27 108.03(13) . . ?
C23 C22 C17 114.42(14) . . ?
C23 C22 H22A 108.7 . . ?
C17 C22 H22A 108.7 . . ?
C23 C22 H22B 108.7 . . ?
C17 C22 H22B 108.7 . . ?
H22A C22 H22B 107.6 . . ?
C24 C23 C22 112.24(16) . . ?
C24 C23 H23A 109.2 . . ?
C22 C23 H23A 109.2 . . ?
C24 C23 H23B 109.2 . . ?
C22 C23 H23B 109.2 . . ?
H23A C23 H23B 107.9 . . ?
C25 C24 C23 110.12(15) . . ?
C25 C24 H24A 109.6 . . ?
C23 C24 H24A 109.6 . . ?
C25 C24 H24B 109.6 . . ?
C23 C24 H24B 109.6 . . ?
H24A C24 H24B 108.1 . . ?
C24 C25 C26 110.97(14) . . ?
C24 C25 H25A 109.4 . . ?
C26 C25 H25A 109.4 . . ?
C24 C25 H25B 109.4 . . ?
C26 C25 H25B 109.4 . . ?
H25A C25 H25B 108.0 . . ?
C25 C26 C17 113.70(14) . . ?
C25 C26 H26A 108.8 . . ?
C17 C26 H26A 108.8 . . ?
C25 C26 H26B 108.8 . . ?
C17 C26 H26B 108.8 . . ?
H26A C26 H26B 107.7 . . ?
C28 C27 C21 113.85(14) . . ?
C28 C27 H27A 108.8 . . ?
C21 C27 H27A 108.8 . . ?
C28 C27 H27B 108.8 . . ?
C21 C27 H27B 108.8 . . ?
H27A C27 H27B 107.7 . . ?
C29 C28 C27 110.57(15) . . ?
C29 C28 H28A 109.5 . . ?
C27 C28 H28A 109.5 . . ?
C29 C28 H28B 109.5 . . ?
C27 C28 H28B 109.5 . . ?
H28A C28 H28B 108.1 . . ?
C30 C29 C28 111.56(14) . . ?
C30 C29 H29A 109.3 . . ?
C28 C29 H29A 109.3 . . ?
C30 C29 H29B 109.3 . . ?
C28 C29 H29B 109.3 . . ?
H29A C29 H29B 108.0 . . ?
C29 C30 C31 112.24(14) . . ?
C29 C30 H30A 109.2 . . ?
C31 C30 H30A 109.2 . . ?
C29 C30 H30B 109.2 . . ?
C31 C30 H30B 109.2 . . ?
H30A C30 H30B 107.9 . . ?
C30 C31 C21 114.43(14) . . ?
C30 C31 H31A 108.7 . . ?
C21 C31 H31A 108.7 . . ?
C30 C31 H31B 108.7 . . ?
C21 C31 H31B 108.7 . . ?
H31A C31 H31B 107.6 . . ?
N2 C32 H32A 109.5 . . ?
N2 C32 H32B 109.5 . . ?
H32A C32 H32B 109.5 . . ?
N2 C32 H32C 109.5 . . ?
H32A C32 H32C 109.5 . . ?
H32B C32 H32C 109.5 . . ?
 
loop_
 _geom_torsion_atom_site_label_1
 _geom_torsion_atom_site_label_2
 _geom_torsion_atom_site_label_3
 _geom_torsion_atom_site_label_4
 _geom_torsion
 _geom_torsion_site_symmetry_1
 _geom_torsion_site_symmetry_2
 _geom_torsion_site_symmetry_3
 _geom_torsion_site_symmetry_4
 _geom_torsion_publ_flag
C16 N1 C1 C2 174.11(14) . . . . ?
C5 N1 C1 C2 -47.94(19) . . . . ?
C16 N1 C1 C6 -61.94(18) . . . . ?
C5 N1 C1 C6 76.01(18) . . . . ?
C16 N1 C1 C10 58.06(18) . . . . ?
C5 N1 C1 C10 -163.99(14) . . . . ?
C4 C3 C2 C1 -59.5(2) . . . . ?
N1 C1 C2 C3 53.05(19) . . . . ?
C6 C1 C2 C3 -72.98(18) . . . . ?
C10 C1 C2 C3 169.84(15) . . . . ?
C2 C3 C4 C5 57.6(2) . . . . ?
C16 N1 C5 C4 -176.63(14) . . . . ?
C1 N1 C5 C4 45.70(19) . . . . ?
C16 N1 C5 C15 59.24(18) . . . . ?
C1 N1 C5 C15 -78.43(18) . . . . ?
C16 N1 C5 C11 -61.38(18) . . . . ?
C1 N1 C5 C11 160.95(14) . . . . ?
C3 C4 C5 N1 -49.2(2) . . . . ?
C3 C4 C5 C15 77.23(18) . . . . ?
C3 C4 C5 C11 -165.49(15) . . . . ?
C8 C7 C6 C1 -52.5(2) . . . . ?
N1 C1 C6 C7 172.33(14) . . . . ?
C2 C1 C6 C7 -64.93(19) . . . . ?
C10 C1 C6 C7 51.96(19) . . . . ?
C6 C7 C8 C9 53.0(2) . . . . ?
C7 C8 C9 C10 -56.2(2) . . . . ?
C8 C9 C10 C1 59.1(2) . . . . ?
N1 C1 C10 C9 -179.26(14) . . . . ?
C2 C1 C10 C9 63.88(19) . . . . ?
C6 C1 C10 C9 -55.24(19) . . . . ?
N1 C5 C11 C12 177.81(15) . . . . ?
C4 C5 C11 C12 -65.34(19) . . . . ?
C15 C5 C11 C12 53.4(2) . . . . ?
C5 C11 C12 C13 -57.2(2) . . . . ?
C11 C12 C13 C14 54.5(2) . . . . ?
C12 C13 C14 C15 -51.9(2) . . . . ?
C13 C14 C15 C5 51.4(2) . . . . ?
N1 C5 C15 C14 -171.00(14) . . . . ?
C4 C5 C15 C14 65.72(19) . . . . ?
C11 C5 C15 C14 -50.45(19) . . . . ?
C32 N2 C17 C18 174.09(14) . . . . ?
C21 N2 C17 C18 -47.67(18) . . . . ?
C32 N2 C17 C22 -61.78(18) . . . . ?
C21 N2 C17 C22 76.46(17) . . . . ?
C32 N2 C17 C26 58.23(17) . . . . ?
C21 N2 C17 C26 -163.53(13) . . . . ?
N2 C17 C18 C19 51.64(18) . . . . ?
C22 C17 C18 C19 -74.32(18) . . . . ?
C26 C17 C18 C19 167.83(14) . . . . ?
C17 C18 C19 C20 -58.39(19) . . . . ?
C18 C19 C20 C21 58.58(19) . . . . ?
C32 N2 C21 C20 -174.20(14) . . . . ?
C17 N2 C21 C20 47.54(18) . . . . ?
C32 N2 C21 C31 61.37(18) . . . . ?
C17 N2 C21 C31 -76.89(17) . . . . ?
C32 N2 C21 C27 -58.76(17) . . . . ?
C17 N2 C21 C27 162.98(13) . . . . ?
C19 C20 C21 N2 -51.79(18) . . . . ?
C19 C20 C21 C31 74.22(18) . . . . ?
C19 C20 C21 C27 -168.21(14) . . . . ?
N2 C17 C22 C23 169.65(14) . . . . ?
C18 C17 C22 C23 -67.33(19) . . . . ?
C26 C17 C22 C23 49.9(2) . . . . ?
C17 C22 C23 C24 -53.5(2) . . . . ?
C22 C23 C24 C25 55.4(2) . . . . ?
C23 C24 C25 C26 -57.2(2) . . . . ?
C24 C25 C26 C17 57.61(19) . . . . ?
N2 C17 C26 C25 -175.64(13) . . . . ?
C18 C17 C26 C25 67.47(17) . . . . ?
C22 C17 C26 C25 -52.07(18) . . . . ?
N2 C21 C27 C28 177.23(14) . . . . ?
C20 C21 C27 C28 -66.13(18) . . . . ?
C31 C21 C27 C28 53.50(19) . . . . ?
C21 C27 C28 C29 -57.2(2) . . . . ?
C27 C28 C29 C30 55.5(2) . . . . ?
C28 C29 C30 C31 -53.4(2) . . . . ?
C29 C30 C31 C21 52.5(2) . . . . ?
N2 C21 C31 C30 -171.03(14) . . . . ?
C20 C21 C31 C30 65.96(18) . . . . ?
C27 C21 C31 C30 -50.80(18) . . . . ?
 
_refine_diff_density_max    0.328
_refine_diff_density_min   -0.271
_refine_diff_density_rms    0.046

_shelx_res_file
;

    608_0m_a.res created by SHELXL-2014/7


TITL 608_0m_a.res in P2(1)/n
REM Old TITL 608_0m in P2(1)/n
REM SHELXT solution in P2(1)/n
REM R1 0.183,  Rweak 0.009,  Alpha 0.028,  Orientation as input
REM Formula found by SHELXT:  C32 N2
CELL  0.71073   8.3640  31.7592  10.5541   90.000   92.253   90.000
ZERR    8.000   0.0011   0.0041   0.0014    0.000    0.002    0.000
LATT  1
SYMM 1/2-X, 1/2+Y, 1/2-Z
REM  SPGR P2(1)/n monoclinic
SFAC C H N
UNIT 128 232 8
TEMP -100.000
SIZE 0.08 0.04 0.02
L.S. 100
BOND $H
LIST 6
FMAP 2
PLAN -20
ACTA
CONF
WPDB
MERG 2

WGHT    0.066800    0.811000
FVAR       0.28082
N1    3    1.037810    0.464446    0.199182    11.00000    0.02701    0.02083 =
         0.02980    0.00300    0.00572    0.00056
C1    1    0.864452    0.473203    0.220754    11.00000    0.02298    0.01856 =
         0.02424    0.00088    0.00259    0.00055
C3    1    0.821737    0.394192    0.216260    11.00000    0.03170    0.02191 =
         0.04361   -0.00371   -0.00460   -0.00458
AFIX  23
H3A   2    0.813231    0.393206    0.309509    11.00000   -1.20000
H3B   2    0.754076    0.371499    0.178586    11.00000   -1.20000
AFIX   0
N2    3    0.386889    0.716721    0.209705    11.00000    0.01756    0.01963 =
         0.02514    0.00189    0.00130    0.00240
C2    1    0.764875    0.436530    0.166359    11.00000    0.02790    0.02843 =
         0.03470   -0.00497   -0.00216    0.00212
AFIX  23
H2A   2    0.651729    0.440589    0.187774    11.00000   -1.20000
H2B   2    0.769945    0.436688    0.072802    11.00000   -1.20000
AFIX   0
C4    1    0.993018    0.387792    0.182121    11.00000    0.03697    0.02302 =
         0.03456   -0.00316   -0.00300    0.00366
AFIX  23
H4A   2    0.997904    0.386610    0.088618    11.00000   -1.20000
H4B   2    1.030177    0.360275    0.216090    11.00000   -1.20000
AFIX   0
C5    1    1.107779    0.422226    0.232260    11.00000    0.02411    0.01933 =
         0.02258    0.00114    0.00346    0.00213
C7    1    0.656005    0.495620    0.381667    11.00000    0.03172    0.03712 =
         0.03295   -0.00243    0.00901    0.00659
AFIX  23
H7A   2    0.581309    0.472161    0.361537    11.00000   -1.20000
H7B   2    0.645772    0.502961    0.472152    11.00000   -1.20000
AFIX   0
C6    1    0.826591    0.481067    0.360862    11.00000    0.02810    0.02699 =
         0.02537    0.00064    0.00390    0.00300
AFIX  23
H6A   2    0.846189    0.454710    0.409088    11.00000   -1.20000
H6B   2    0.901567    0.502602    0.395979    11.00000   -1.20000
AFIX   0
C8    1    0.609013    0.533451    0.300543    11.00000    0.03486    0.03567 =
         0.04849   -0.00099    0.00898    0.01123
AFIX  23
H8A   2    0.671766    0.558288    0.329771    11.00000   -1.20000
H8B   2    0.494277    0.539795    0.310370    11.00000   -1.20000
AFIX   0
C9    1    0.638852    0.525219    0.161441    11.00000    0.03686    0.03162 =
         0.04047    0.00697    0.00135    0.01175
AFIX  23
H9A   2    0.612860    0.550812    0.111193    11.00000   -1.20000
H9B   2    0.568345    0.502167    0.129754    11.00000   -1.20000
AFIX   0
C10   1    0.814537    0.513074    0.144564    11.00000    0.03784    0.02803 =
         0.03267    0.00549    0.00483    0.00482
AFIX  23
H10A  2    0.883968    0.536849    0.172370    11.00000   -1.20000
H10B  2    0.831438    0.508056    0.053484    11.00000   -1.20000
AFIX   0
C11   1    1.263858    0.417019    0.160196    11.00000    0.03636    0.03527 =
         0.03289    0.00238    0.01166    0.00726
AFIX  23
H11A  2    1.238003    0.418485    0.067956    11.00000   -1.20000
H11B  2    1.336235    0.440796    0.182320    11.00000   -1.20000
AFIX   0
C12   1    1.351618    0.375709    0.189341    11.00000    0.03209    0.03615 =
         0.03703   -0.00065    0.00926    0.01037
AFIX  23
H12A  2    1.283883    0.351779    0.160096    11.00000   -1.20000
H12B  2    1.451819    0.374873    0.142496    11.00000   -1.20000
AFIX   0
C13   1    1.390933    0.371157    0.330203    11.00000    0.03471    0.04179 =
         0.04116    0.00308    0.00040    0.01505
AFIX  23
H13A  2    1.470040    0.392894    0.357084    11.00000   -1.20000
H13B  2    1.439702    0.343197    0.346825    11.00000   -1.20000
AFIX   0
C14   1    1.242195    0.375751    0.407422    11.00000    0.03774    0.04005 =
         0.03071    0.00626    0.00140    0.01104
AFIX  23
H14A  2    1.274331    0.376097    0.498702    11.00000   -1.20000
H14B  2    1.172217    0.350992    0.391924    11.00000   -1.20000
AFIX   0
C15   1    1.147500    0.415801    0.375118    11.00000    0.02616    0.02854 =
         0.02467    0.00074    0.00217    0.00462
AFIX  23
H15A  2    1.209685    0.440378    0.407137    11.00000   -1.20000
H15B  2    1.046113    0.415083    0.420419    11.00000   -1.20000
AFIX   0
C16   1    1.142777    0.499895    0.236394    11.00000    0.02811    0.02258 =
         0.04530    0.00242    0.00749   -0.00311
AFIX 137
H16A  2    1.254408    0.492185    0.223451    11.00000   -1.50000
H16B  2    1.129478    0.506543    0.326041    11.00000   -1.50000
H16C  2    1.114351    0.524564    0.184474    11.00000   -1.50000
AFIX   0
C17   1    0.320140    0.673205    0.224190    11.00000    0.02118    0.02180 =
         0.01916    0.00114    0.00157    0.00044
C18   1    0.420614    0.642395    0.148972    11.00000    0.02324    0.02538 =
         0.02785   -0.00514    0.00224   -0.00060
AFIX  23
H18A  2    0.385445    0.613308    0.166906    11.00000   -1.20000
H18B  2    0.400619    0.647659    0.057260    11.00000   -1.20000
AFIX   0
C19   1    0.598914    0.645873    0.179757    11.00000    0.02177    0.02661 =
         0.04532   -0.00859    0.00104    0.00382
AFIX  23
H19A  2    0.621846    0.639019    0.270159    11.00000   -1.20000
H19B  2    0.658067    0.625777    0.127307    11.00000   -1.20000
AFIX   0
C20   1    0.651354    0.690356    0.152618    11.00000    0.01916    0.03237 =
         0.03149   -0.00750    0.00289   -0.00097
AFIX  23
H20A  2    0.633323    0.696064    0.060952    11.00000   -1.20000
H20B  2    0.767655    0.692767    0.172508    11.00000   -1.20000
AFIX   0
C21   1    0.563750    0.723835    0.227925    11.00000    0.01966    0.02263 =
         0.01780    0.00044   -0.00224    0.00033
C22   1    0.309839    0.658730    0.363510    11.00000    0.03417    0.03337 =
         0.02143    0.00492    0.00072   -0.00570
AFIX  23
H22A  2    0.419762    0.654665    0.399683    11.00000   -1.20000
H22B  2    0.259401    0.681414    0.412378    11.00000   -1.20000
AFIX   0
C23   1    0.215161    0.617938    0.380900    11.00000    0.04571    0.03672 =
         0.02959    0.00860    0.00404   -0.00970
AFIX  23
H23A  2    0.274556    0.594172    0.344380    11.00000   -1.20000
H23B  2    0.205627    0.612431    0.472621    11.00000   -1.20000
AFIX   0
C24   1    0.049106    0.620055    0.317995    11.00000    0.03543    0.03294 =
         0.03926   -0.00205    0.01363   -0.00995
AFIX  23
H24A  2   -0.004989    0.592521    0.326253    11.00000   -1.20000
H24B  2   -0.015252    0.641589    0.360740    11.00000   -1.20000
AFIX   0
C25   1    0.060226    0.631136    0.178947    11.00000    0.02224    0.03554 =
         0.03506   -0.00432    0.00251   -0.00287
AFIX  23
H25A  2   -0.048824    0.633388    0.139550    11.00000   -1.20000
H25B  2    0.117334    0.608428    0.135071    11.00000   -1.20000
AFIX   0
C26   1    0.149096    0.672919    0.162643    11.00000    0.01967    0.03066 =
         0.02603    0.00078    0.00099    0.00071
AFIX  23
H26A  2    0.086298    0.695801    0.200496    11.00000   -1.20000
H26B  2    0.155736    0.678934    0.070961    11.00000   -1.20000
AFIX   0
C27   1    0.604480    0.766976    0.168711    11.00000    0.02640    0.02902 =
         0.02758    0.00715   -0.00425   -0.00299
AFIX  23
H27A  2    0.575509    0.766145    0.076889    11.00000   -1.20000
H27B  2    0.538227    0.788975    0.207436    11.00000   -1.20000
AFIX   0
C28   1    0.780656    0.779313    0.186106    11.00000    0.02968    0.03239 =
         0.03021    0.00247   -0.00094   -0.00910
AFIX  23
H28A  2    0.847505    0.758902    0.141026    11.00000   -1.20000
H28B  2    0.797336    0.807510    0.148883    11.00000   -1.20000
AFIX   0
C29   1    0.831484    0.779983    0.326123    11.00000    0.03083    0.03112 =
         0.03101   -0.00450   -0.00603   -0.00636
AFIX  23
H29A  2    0.947308    0.786270    0.335097    11.00000   -1.20000
H29B  2    0.773048    0.802652    0.369071    11.00000   -1.20000
AFIX   0
C30   1    0.798089    0.738254    0.389574    11.00000    0.03182    0.03488 =
         0.02699   -0.00046   -0.01014   -0.00071
AFIX  23
H30A  2    0.822870    0.740782    0.481757    11.00000   -1.20000
H30B  2    0.869283    0.716433    0.355610    11.00000   -1.20000
AFIX   0
C31   1    0.623610    0.724342    0.368379    11.00000    0.02810    0.02804 =
         0.02234    0.00201   -0.00314   -0.00242
AFIX  23
H31A  2    0.554540    0.743516    0.416009    11.00000   -1.20000
H31B  2    0.611568    0.695721    0.403924    11.00000   -1.20000
AFIX   0
C32   1    0.289971    0.749536    0.267239    11.00000    0.02518    0.02513 =
         0.04615   -0.00291    0.00521    0.00372
AFIX 137
H32A  2    0.219582    0.762494    0.201840    11.00000   -1.50000
H32B  2    0.360488    0.771059    0.305616    11.00000   -1.50000
H32C  2    0.225076    0.736985    0.332705    11.00000   -1.50000
AFIX   0
HKLF 4

REM  608_0m_a.res in P2(1)/n
REM R1 =  0.0580 for    4684 Fo > 4sig(Fo)  and  0.0971 for all    7014 data
REM    309 parameters refined using      0 restraints

END

WGHT      0.0653      0.8451

REM Highest difference peak  0.328,  deepest hole -0.271,  1-sigma level  0.046
Q1    1   0.3554  0.6947  0.2229  11.00000  0.05    0.33
Q2    1   0.9416  0.4324  0.1852  11.00000  0.05    0.32
Q3    1   0.3142  0.6658  0.2920  11.00000  0.05    0.31
Q4    1   0.3000  0.7768  0.2402  11.00000  0.05    0.31
Q5    1   1.1860  0.3844  0.1524  11.00000  0.05    0.30
Q6    1   0.7171  0.4723  0.1280  11.00000  0.05    0.29
Q7    1   0.5841  0.7463  0.2036  11.00000  0.05    0.29
Q8    1   0.9701  0.5073  0.1832  11.00000  0.05    0.29
Q9    1   1.2184  0.4640  0.2101  11.00000  0.05    0.28
Q10   1   1.3107  0.3975  0.4207  11.00000  0.05    0.27
Q11   1   0.2417  0.6726  0.1925  11.00000  0.05    0.27
Q12   1   0.8168  0.4586  0.1950  11.00000  0.05    0.27
Q13   1   0.8440  0.4777  0.2890  11.00000  0.05    0.26
Q14   1   0.6979  0.5200  0.3794  11.00000  0.05    0.26
Q15   1   0.3006  0.7472  0.3606  11.00000  0.05    0.25
Q16   1   0.5987  0.7232  0.2936  11.00000  0.05    0.25
Q17   1   1.1271  0.4208  0.2977  11.00000  0.05    0.24
Q18   1   0.1837  0.7447  0.2561  11.00000  0.05    0.23
Q19   1   1.1847  0.3931  0.3918  11.00000  0.05    0.23
Q20   1   0.5094  0.6441  0.1699  11.00000  0.05    0.23
;
_shelx_res_checksum   39218

_shelx_hkl_file
;
   1   0   0   -2.00    0.20
   1   0   0   -2.10    0.20
  -1   0   0   -1.70    0.20
  -2   0   0 1259.27   25.90
   2   0   0 1219.88   25.80
   2   0   0 1261.47   25.90
   3   0   0   -0.10    0.40
  -3   0   0    0.40    0.40
   3   0   0    0.20    0.40
   4   0   0  690.13   14.40
   4   0   0  701.73   14.60
  -4   0   0  690.33   14.50
   5   0   0    0.60    0.60
  -5   0   0    0.70    0.60
   5   0   0    0.50    0.50
  -6   0   0   12.80    1.00
   6   0   0   13.70    1.00
   6   0   0   11.90    1.10
   7   0   0    1.60    0.70
  -7   0   0    1.30    0.80
   7   0   0    1.60    0.90
   8   0   0    4.90    1.10
   9   0   0    0.80    1.10
  10   0   0    0.00    1.20
   1  -1   0  223.78    4.60
  -1   1   0  213.18    4.50
   1   1   0  215.88    4.50
   1   1   0  219.28    4.50
   2  -1   0  201.18    4.30
   2  -1   0  197.28    4.20
  -2  -1   0  202.88    4.30
  -2   1   0  199.38    4.30
   2   1   0  200.78    4.30
   2   1   0  199.68    4.30
   3  -1   0   15.10    0.70
  -3  -1   0   13.10    0.70
   3  -1   0   13.30    0.80
   3   1   0   15.10    0.80
   3   1   0   15.40    0.70
  -3   1   0   13.10    0.80
  -4  -1   0  261.47    5.60
   4  -1   0  258.57    5.60
   4  -1   0  256.87    5.80
   4   1   0  251.57    5.70
  -4   1   0  257.17    5.70
   4   1   0  258.07    5.60
   5  -1   0  121.89    2.90
   5  -1   0  119.09    3.10
  -5  -1   0  118.69    3.00
   5   1   0  117.59    3.10
  -5   1   0  120.79    3.00
   5   1   0  123.09    3.00
  -6  -1   0   55.69    1.80
   6  -1   0   54.19    2.00
   6  -1   0   53.79    1.70
   6   1   0   57.69    1.80
   6   1   0   53.79    2.00
  -6   1   0   57.19    1.90
   7  -1   0    0.80    0.60
  -7  -1   0   -0.50    0.70
   7  -1   0   -0.90    0.80
  -7   1   0   -0.70    0.80
   7   1   0    0.10    0.60
   7   1   0   -0.50    0.80
   8  -1   0   13.20    1.40
   8   1   0   10.50    1.30
   9  -1   0    7.00    1.20
   9   1   0    5.00    1.30
  10  -1   0   -0.50    1.10
  10   1   0   -1.50    1.10
   1  -2   0   19.40    0.60
  -1   2   0   20.50    0.70
   1   2   0   19.20    0.60
  -2  -2   0   12.00    0.60
   2  -2   0   12.00    0.50
   2  -2   0   11.80    0.70
   2   2   0   13.00    0.60
  -2   2   0   12.30    0.60
   2   2   0   11.60    0.60
  -3  -2   0   63.99    1.60
   3  -2   0   63.89    1.60
   3  -2   0   62.89    1.80
  -3   2   0   63.49    1.70
   3   2   0   64.09    1.70
   3   2   0   62.39    1.70
   4  -2   0    0.40    0.40
  -4  -2   0    1.10    0.50
   4  -2   0    1.60    0.60
   4   2   0    1.00    0.50
   4   2   0    1.10    0.50
  -4   2   0    1.40    0.60
   5  -2   0   18.40    1.10
   5  -2   0   18.20    0.90
  -5  -2   0   20.40    1.00
  -5   2   0   18.00    1.10
   5   2   0   16.90    1.00
   5   2   0   17.10    1.00
  -6  -2   0   30.50    1.40
   6  -2   0   31.30    1.50
   6  -2   0   34.10    1.30
   6   2   0   28.90    1.50
   6   2   0   30.30    1.40
  -6   2   0   29.80    1.40
   7  -2   0   64.49    2.40
   7  -2   0   64.59    2.00
  -7   2   0   64.29    2.20
   7   2   0   64.89    2.10
   7   2   0   64.49    2.30
   8  -2   0   15.10    1.40
   8   2   0   11.70    1.30
   8   2   0   13.90    1.20
   9  -2   0   20.50    1.70
   9   2   0   22.80    1.80
  10  -2   0   19.60    1.90
  10   2   0   17.30    1.80
  11  -2   0    1.30    1.40
   0   3   0   -0.10    0.20
   1  -3   0  510.15   10.30
   1   3   0  497.55   10.30
  -1   3   0  489.25   10.30
  -2  -3   0  298.97    6.20
   2  -3   0  298.37    6.40
   2  -3   0  297.57    6.20
   2   3   0  293.37    6.30
  -2   3   0  296.57    6.30
   2   3   0  295.87    6.20
  -3  -3   0  576.94   11.90
   3  -3   0  584.84   12.10
   3  -3   0  575.34   11.80
   3   3   0  580.14   12.00
  -3   3   0  563.54   12.00
   3   3   0  558.74   11.90
  -4  -3   0  414.46    8.50
   4  -3   0  397.66    8.70
   4  -3   0  407.66    8.50
   4   3   0  401.46    8.60
   4   3   0  398.16    8.60
  -4   3   0  388.86    8.60
   5  -3   0    3.60    0.80
  -5  -3   0    3.40    0.60
   5  -3   0    3.30    0.50
   5   3   0    3.20    0.60
  -5   3   0    3.40    0.70
   5   3   0    4.10    0.60
  -6  -3   0   57.19    1.80
   6  -3   0   55.69    2.00
   6  -3   0   58.29    1.70
   6   3   0   53.19    1.90
  -6   3   0   54.39    1.90
   6   3   0   55.69    1.80
   7  -3   0   -1.00    0.90
   7   3   0    1.00    0.80
  -7   3   0   -0.10    0.80
   7   3   0   -0.10    0.60
   8  -3   0    8.20    1.20
   8   3   0    8.30    1.00
   8   3   0    8.10    1.20
   9  -3   0    0.60    1.00
   9   3   0   -0.60    1.00
  10  -3   0    4.50    1.40
  11  -3   0    4.10    1.40
   0   4   0   60.69    1.50
   0   4   0   60.89    1.40
   1  -4   0  490.35    9.90
  -1   4   0  483.45    9.90
   1   4   0  456.25    9.80
   1   4   0  474.75    9.80
  -2  -4   0  173.48    3.70
   2  -4   0  177.68    3.90
   2   4   0  174.18    3.80
  -2   4   0  176.68    3.90
   2   4   0  175.98    3.90
   3  -4   0   42.90    1.10
   3  -4   0   42.50    1.40
  -3  -4   0   43.90    1.20
   3   4   0   41.70    1.30
  -3   4   0   41.30    1.40
   3   4   0   42.00    1.30
   4  -4   0  240.18    5.60
  -4  -4   0  242.28    5.30
   4  -4   0  248.38    5.30
   4   4   0  240.58    5.40
   4   4   0  245.58    5.40
  -4   4   0  243.78    5.50
  -5  -4   0    3.00    0.60
   5  -4   0    1.70    0.50
   5  -4   0    3.20    0.80
   5   4   0    2.80    0.60
  -5   4   0    1.90    0.70
   5   4   0    3.20    0.70
   6  -4   0   36.40    1.80
   6  -4   0   37.60    1.30
  -6  -4   0   36.90    1.40
   6   4   0   35.30    1.60
  -6   4   0   33.30    1.60
   6   4   0   36.90    1.40
   7  -4   0    0.60    0.80
   7   4   0    0.60    0.70
   7   4   0    1.40    0.80
  -7   4   0    0.70    0.80
   8  -4   0    0.20    1.00
  -8   4   0   -0.60    1.00
   8   4   0    0.80    0.70
   8   4   0    2.30    1.00
   9  -4   0    1.20    1.10
   9   4   0   -0.20    1.00
  10  -4   0    0.00    1.10
  11  -4   0    4.30    1.50
   0   5   0   -0.40    0.30
   0   5   0    0.10    0.20
   1  -5   0  629.64   13.00
   1   5   0  634.24   12.90
  -1   5   0  614.94   13.00
   1   5   0  632.24   12.90
  -2  -5   0   90.49    2.10
   2  -5   0   94.89    2.30
   2   5   0   89.79    2.20
  -2   5   0   96.89    2.30
  -3  -5   0   22.40    0.80
   3  -5   0   23.00    0.70
   3  -5   0   22.30    1.00
  -3   5   0   22.30    1.10
   3   5   0   22.70    0.90
   3   5   0   24.30    0.90
   4  -5   0    5.90    0.80
   4  -5   0    6.90    0.50
  -4  -5   0    6.80    0.60
   4   5   0    6.80    0.70
  -4   5   0    5.70    0.80
   4   5   0    7.90    0.70
   5  -5   0    7.00    0.60
   5  -5   0    5.60    0.80
  -5  -5   0    7.60    0.70
   5   5   0    6.70    0.80
  -5   5   0    6.50    0.80
   5   5   0    7.20    0.80
  -6  -5   0   12.10    0.90
   6  -5   0   14.50    0.90
   6  -5   0   14.00    1.20
   6   5   0   13.10    1.00
   6   5   0   11.60    1.00
  -6   5   0    9.50    1.00
   7  -5   0    2.60    1.00
   7   5   0    0.90    0.80
   7   5   0    1.10    0.80
  -7   5   0    3.40    0.90
   8  -5   0    5.90    1.20
   8   5   0    3.80    1.10
   8   5   0    4.20    1.00
  -8   5   0    4.20    1.10
   9  -5   0    0.90    1.00
   9   5   0    0.40    0.90
  10  -5   0    4.40    1.30
  11  -5   0    2.20    1.50
   0   6   0    2.50    0.40
   0   6   0    2.10    0.30
  -1   6   0   31.50    0.80
   1   6   0   32.20    0.90
   1   6   0   32.70    1.00
  -1   6   0   32.10    1.10
   2  -6   0   25.80    1.00
   2   6   0   25.20    0.90
  -2   6   0   27.60    1.10
   2   6   0   26.90    0.80
  -3  -6   0  121.49    2.70
   3  -6   0  122.39    3.00
  -3   6   0  116.39    2.90
   3   6   0  121.29    2.90
   3   6   0  119.59    2.80
   4  -6   0  248.58    5.70
  -4  -6   0  253.87    5.40
   4   6   0  249.28    5.60
   4   6   0  249.58    5.60
  -4   6   0  251.57    5.70
   5  -6   0   49.30    1.80
  -5  -6   0   49.90    1.50
   5  -6   0   51.89    1.40
   5   6   0   51.19    1.70
  -5   6   0   53.69    1.80
   5   6   0   51.49    1.70
  -6  -6   0   83.29    2.30
   6  -6   0   86.09    2.20
   6  -6   0   76.09    2.60
   6   6   0   81.99    2.40
   6   6   0   83.29    2.50
  -6   6   0   76.89    2.50
   7  -6   0   43.60    2.10
   7   6   0   50.59    2.00
  -7   6   0   46.80    2.00
   7   6   0   50.39    1.90
   8  -6   0    6.40    1.20
   8   6   0    6.80    1.00
  -8   6   0    8.00    1.20
   8   6   0    7.90    1.20
   9  -6   0    3.90    1.20
   9   6   0    2.70    0.90
  10  -6   0   10.60    1.70
  11  -6   0    0.40    1.40
   0   7   0    0.30    0.40
   0   7   0   -0.20    0.30
   1   7   0    5.70    0.50
   1   7   0    6.00    0.40
  -1   7   0    7.20    0.60
  -1   7   0    5.40    0.30
   2  -7   0    7.50    0.60
  -2   7   0    6.80    0.60
   2   7   0    7.90    0.50
   2   7   0    7.60    0.60
  -3  -7   0   -0.10    0.30
   3  -7   0   -0.20    0.60
  -3   7   0   -0.50    0.60
   3   7   0    0.10    0.50
   3   7   0   -0.20    0.40
  -4  -7   0  104.39    2.50
   4  -7   0  103.39    2.80
   4   7   0  107.19    2.60
   4   7   0  105.29    2.70
  -4   7   0  103.09    2.80
   5  -7   0   49.90    1.90
  -5  -7   0   55.09    1.60
   5   7   0   54.19    1.70
  -5   7   0   52.09    1.80
   5   7   0   53.49    1.80
   6  -7   0  103.39    3.10
  -6   7   0   99.89    2.90
   6   7   0  104.99    2.90
   6   7   0   99.69    2.80
   7  -7   0    0.20    0.90
  -7   7   0    0.10    0.90
   7   7   0   -0.30    0.80
   7   7   0    1.40    0.80
   8  -7   0    1.30    1.00
   8   7   0    0.70    0.90
   8   7   0    0.70    0.90
  -8   7   0   -1.40    0.90
   9  -7   0    7.70    1.40
   9   7   0    7.40    1.20
  10  -7   0    4.70    1.50
  11  -7   0   16.50    2.10
   0   8   0 3192.08   67.09
   0   8   0 3287.87   66.79
  -1   8   0    2.60    0.30
   1   8   0    2.90    0.40
  -1   8   0    2.40    0.50
   1   8   0    2.50    0.40
   2  -8   0   11.00    0.80
   2   8   0    9.50    0.70
  -2   8   0    8.90    0.70
   2   8   0   10.70    0.60
  -3  -8   0    6.50    0.50
   3  -8   0    5.90    0.80
  -3   8   0    5.30    0.70
   3   8   0    5.90    0.70
   4  -8   0    5.80    0.80
  -4  -8   0    7.60    0.60
   4   8   0    6.10    0.70
   4   8   0    7.40    0.70
  -4   8   0    6.90    0.90
   5  -8   0   14.20    1.10
  -5  -8   0   13.40    0.80
   5   8   0   13.00    0.90
  -5   8   0   14.80    1.10
   5   8   0   12.70    1.00
   6  -8   0    0.50    0.90
   6   8   0    0.10    0.60
   6   8   0    0.70    0.70
  -6   8   0    1.30    0.80
   7  -8   0    3.90    1.10
   7   8   0    3.00    0.90
   7   8   0    2.70    0.80
  -7   8   0    2.70    1.00
   8  -8   0   10.20    1.50
   8   8   0   11.80    1.30
  -8   8   0    8.60    1.30
   8   8   0   10.80    1.20
   9  -8   0   -1.00    1.00
   9   8   0    1.60    1.00
  10  -8   0    4.40    1.50
  11  -8   0   14.00    1.90
   0   9   0    0.30    0.30
   0   9   0    0.40    0.40
   1   9   0   24.50    0.90
  -1   9   0   26.60    0.70
   1   9   0   25.00    0.90
  -1   9   0   25.10    1.10
  -2   9   0  412.86    8.50
  -2   9   0  415.66    8.80
   2   9   0  410.86    8.80
   2   9   0  417.16    8.60
   3  -9   0    1.50    0.60
  -3   9   0    0.80    0.60
   3   9   0    0.90    0.50
  -4  -9   0   40.30    1.20
   4  -9   0   39.90    1.60
   4   9   0   39.30    1.50
   4   9   0   42.20    1.40
  -4   9   0   40.20    1.60
   5  -9   0   94.69    2.80
  -5  -9   0  100.19    2.40
  -5   9   0   98.09    2.80
   5   9   0   93.79    2.70
   5   9   0  100.69    2.60
   6  -9   0  156.48    4.30
  -6   9   0  162.38    4.10
   6   9   0  150.98    4.00
   6   9   0  157.88    4.00
   7  -9   0    5.90    1.10
  -7   9   0    7.50    1.20
   7   9   0    6.00    1.00
   7   9   0    7.00    1.00
   8  -9   0   -0.20    1.00
  -8   9   0   -0.80    1.00
   8   9   0    0.80    0.80
   9  -9   0    3.60    1.20
   9   9   0    3.00    1.00
  10  -9   0    1.70    1.20
   0  10   0   26.40    0.90
   0  10   0   28.70    1.00
   1  10   0   -0.10    0.40
  -1  10   0   -0.60    0.50
   1  10   0   -0.50    0.40
  -1  10   0    0.20    0.30
   2  10   0   36.80    1.10
  -2  10   0   37.60    1.40
  -2  10   0   36.70    0.90
   2  10   0   36.80    1.20
   3 -10   0   13.60    1.00
   3  10   0   11.00    0.80
  -3  10   0   12.60    0.90
   3  10   0   11.90    0.70
  -4 -10   0   13.20    0.70
   4 -10   0   12.50    1.00
   4  10   0   10.90    0.90
   4  10   0   13.60    0.80
  -4  10   0   12.20    1.00
   5 -10   0    0.10    0.70
  -5 -10   0    0.60    0.40
  -5  10   0    0.50    0.70
   5  10   0    0.70    0.60
   5  10   0    0.20    0.50
   6 -10   0   67.09    2.50
   6  10   0   69.49    2.20
   6  10   0   69.69    2.30
  -6  10   0   70.59    2.50
   7 -10   0    1.10    1.00
   7  10   0    3.00    0.80
   7  10   0    1.10    0.80
  -7  10   0    1.40    1.00
   8 -10   0    8.60    1.30
  -8  10   0    9.40    1.40
   8  10   0    7.30    1.10
   9 -10   0    1.10    1.30
   9  10   0    1.30    1.00
  10 -10   0   15.40    1.80
   0  11   0   -0.40    0.30
   0  11   0   -0.40    0.40
  -1  11   0  307.97    6.30
   1  11   0  297.37    6.40
   1  11   0  300.77    6.50
  -1  11   0  298.47    6.60
  -2  11   0  647.44   13.20
   2  11   0  652.83   13.40
   2  11   0  639.24   13.30
  -2  11   0  627.14   13.50
   3 -11   0  239.68    5.50
  -3  11   0  239.38    5.50
   3  11   0  237.98    5.10
   3  11   0  235.28    5.40
  -4 -11   0   50.19    1.40
   4 -11   0   50.59    1.80
   4  11   0   52.09    1.60
   4  11   0   53.59    1.70
  -4  11   0   52.19    1.90
  -5 -11   0  107.59    2.60
   5 -11   0  104.39    3.10
  -5  11   0  102.99    3.00
   5  11   0  105.19    2.70
   5  11   0  103.49    2.90
   6 -11   0    1.00    0.90
   6  11   0   -0.10    0.60
  -6  11   0   -0.50    1.00
   6  11   0   -0.10    0.70
   7 -11   0   14.80    1.50
   7  11   0   15.50    1.30
   7  11   0   15.00    1.20
  -7  11   0   16.80    1.50
   8 -11   0    4.90    1.30
  -8  11   0    4.50    1.30
   8  11   0    3.70    1.10
   9 -11   0    5.50    1.40
  -9  11   0    4.10    1.30
   9  11   0    6.30    1.20
  10 -11   0    3.40    1.40
  10  11   0    1.80    1.10
   0  12   0  138.89    3.30
   0  12   0  144.39    3.20
  -1  12   0    8.80    0.80
   1  12   0    9.00    0.60
   1  12   0    7.50    0.60
  -1  12   0    8.30    0.50
  -2  12   0  397.06    8.80
   2  12   0  404.76    8.70
  -2  12   0  417.26    8.40
   2  12   0  412.56    8.60
  -3  12   0    0.80    0.70
   3  12   0    0.60    0.60
  -3  12   0    1.00    0.20
   3  12   0    1.40    0.40
  -4 -12   0    4.20    0.50
   4 -12   0    4.30    0.80
  -4  12   0    4.10    0.90
   4  12   0    4.00    0.70
  -5 -12   0   13.50    1.10
   5 -12   0   14.90    1.20
   5  12   0   15.00    1.10
  -5  12   0   13.10    1.10
   5  12   0   12.30    0.90
   6 -12   0   41.30    2.10
   6  12   0   40.70    1.80
  -6  12   0   43.30    1.90
   6  12   0   42.60    1.70
   7 -12   0    4.50    1.10
   7  12   0    5.90    1.00
  -7  12   0    5.10    1.10
   8 -12   0    3.40    1.20
  -8  12   0    3.60    1.20
   8  12   0    3.90    1.10
   9 -12   0    0.20    1.30
  -9  12   0    0.50    1.20
   9  12   0    1.40    1.10
  10  12   0    0.70    1.20
   0  13   0    0.60    0.40
   0  13   0    0.50    0.50
  -1  13   0  102.59    2.60
  -1  13   0  102.59    2.30
   1  13   0   98.79    2.50
   1  13   0   98.39    2.50
  -2  13   0    0.60    0.70
  -2  13   0    0.00    0.30
   2  13   0   -0.50    0.50
   2  13   0   -0.10    0.40
  -3  13   0   77.69    2.30
   3  13   0   78.99    2.20
  -3  13   0   78.59    1.80
   3  13   0   75.59    1.90
  -4 -13   0    0.50    0.40
   4  13   0    0.20    0.60
  -4  13   0    0.50    0.80
   5 -13   0   43.50    2.00
  -5  13   0   39.80    1.90
   5  13   0   42.70    1.50
   5  13   0   46.30    1.80
   6 -13   0   48.00    2.10
   6  13   0   54.59    1.90
   6  13   0   50.79    2.00
  -6  13   0   53.99    2.30
   7 -13   0   37.10    2.20
   7  13   0   34.90    1.80
  -7  13   0   34.40    2.10
   8 -13   0    1.70    1.10
  -8  13   0    2.30    1.20
   8  13   0    2.00    1.00
   9  13   0    2.10    1.00
  -9  13   0   -0.70    1.20
  10  13   0    2.10    1.20
   0  14   0   46.70    1.60
   0  14   0   45.80    1.40
  -1  14   0   14.20    1.00
   1  14   0   12.00    0.80
  -1  14   0   13.00    0.70
   1  14   0   15.00    0.90
   2  14   0    0.50    0.60
   2  14   0    0.50    0.50
  -2  14   0    1.00    0.30
  -2  14   0    0.40    0.70
  -3  14   0   -0.70    0.70
   3  14   0    0.60    0.40
   3  14   0    0.00    0.50
  -3  14   0    0.40    0.20
   4  14   0   60.49    2.00
  -4  14   0   61.69    2.20
   5  14   0  118.29    3.20
  -5  14   0  118.09    3.40
   5  14   0  119.79    3.00
   6 -14   0   69.79    2.70
  -6  14   0   83.19    2.80
   6  14   0   75.89    2.50
   6  14   0   74.89    2.90
   7 -14   0   -1.90    0.90
   7  14   0    0.50    0.90
  -7  14   0   -0.40    1.10
   8  14   0    3.30    1.00
  -8  14   0    3.00    1.10
  -9  14   0    2.40    1.30
   9  14   0    0.00    1.00
  10  14   0    1.30    1.10
   0  15   0   -0.80    0.60
   0  15   0    0.70    0.50
  -1  15   0   23.00    1.20
  -1  15   0   25.20    0.90
   1  15   0   24.50    1.10
   1  15   0   22.90    1.00
  -2  15   0  268.97    5.50
   2  15   0  255.77    5.70
  -2  15   0  256.87    6.00
   2  15   0  258.77    5.80
  -3  15   0   13.00    1.10
   3  15   0   12.90    0.90
  -3  15   0   13.10    0.50
   3  15   0   11.60    0.80
   4  15   0    6.50    0.80
  -4  15   0    8.50    1.00
   4  15   0    8.00    0.60
   5  15   0    0.60    0.70
  -5  15   0    0.50    0.90
   5  15   0    2.10    0.60
   6  15   0    1.80    0.80
  -6  15   0    1.40    1.10
  -7  15   0   21.00    1.70
   7  15   0   19.10    1.50
   8  15   0    6.40    1.10
  -8  15   0    5.50    1.20
  -9  15   0   -0.10    1.30
   9  15   0    2.10    1.10
  10  15   0   -1.10    1.00
   0  16   0    1.10    0.60
   0  16   0    0.70    0.50
  -1  16   0  245.38    5.30
   1  16   0  245.68    5.50
   1  16   0  245.78    5.50
  -1  16   0  252.27    5.70
  -2  16   0   99.99    2.20
  -2  16   0   91.49    2.70
   2  16   0   94.09    2.50
   2  16   0   93.49    2.40
   3  16   0    2.20    0.50
  -3  16   0    2.20    0.70
   3  16   0    2.30    0.70
  -3  16   0    2.30    0.30
  -4  16   0   52.79    2.10
   4  16   0   56.29    2.00
   4  16   0   51.49    1.50
   5  16   0   30.60    1.50
   5  16   0   32.10    1.30
  -5  16   0   30.30    1.70
   6  16   0    1.00    0.90
  -6  16   0    2.20    1.00
  -7  16   0    0.00    1.00
   7  16   0    0.60    1.00
   8  16   0    0.30    0.90
  -8  16   0    1.20    1.10
   9  16   0    0.30    1.00
  -9  16   0    0.50    1.30
  10  16   0    4.00    1.20
   0  17   0    0.30    0.40
   0  17   0    0.70    0.60
  -1  17   0   46.00    1.30
  -1  17   0   47.40    1.70
   1  17   0   46.70    1.60
   1  17   0   44.10    1.50
   2  17   0   29.70    1.30
   2  17   0   30.70    1.20
  -2  17   0   30.50    1.00
  -2  17   0   29.20    1.40
  -3  17   0    2.40    0.80
   3  17   0    3.70    0.60
   3  17   0    4.80    0.70
   4  17   0    2.10    0.70
   4  17   0    1.50    0.50
  -4  17   0    0.50    0.80
   5  17   0    1.40    0.80
  -5  17   0    1.10    1.00
   6  17   0   -0.10    0.80
  -6  17   0   -0.70    1.10
   7  17   0   18.90    1.50
  -7  17   0   21.40    1.80
  -8  17   0    8.00    1.40
   8  17   0    5.80    1.30
  -9  17   0   21.30    2.00
   9  17   0   23.90    1.90
  10  17   0    0.20    1.10
   0  18   0   15.10    1.00
   0  18   0   15.20    0.90
   1  18   0   14.30    1.00
   1  18   0   12.90    0.90
  -1  18   0   13.00    0.80
  -1  18   0   12.00    1.00
  -2  18   0   22.50    1.40
   2  18   0   20.10    1.10
   2  18   0   18.40    1.10
  -2  18   0   22.80    0.80
   3  18   0   12.50    0.90
  -3  18   0   13.70    1.20
   3  18   0   15.90    1.10
   4  18   0    5.60    0.90
  -4  18   0    6.20    1.00
  -5  18   0   12.90    1.30
   5  18   0   11.70    1.20
  -6  18   0   20.00    1.60
   6  18   0   23.50    1.60
  -7  18   0    3.10    1.30
   7  18   0    0.30    1.00
   8  18   0    1.20    1.00
  -8  18   0    3.20    1.30
   9  18   0    5.00    1.30
  -9  18   0    5.60    1.60
 -10  18   0   -3.70    1.90
  10  18   0    1.60    1.30
   0  19   0    0.30    0.50
   0  19   0   -0.10    0.60
  -1  19   0   39.50    1.30
  -1  19   0   36.70    1.60
   1  19   0   36.20    1.40
   1  19   0   40.40    1.40
  -2  19   0   23.20    1.40
   2  19   0   24.10    1.20
  -2  19   0   25.40    0.90
   2  19   0   24.30    1.20
  -3  19   0    3.50    0.80
   3  19   0    3.10    0.70
   3  19   0    4.40    0.60
   4  19   0   34.90    1.70
  -4  19   0   38.50    1.80
   5  19   0    0.80    0.80
  -5  19   0    0.80    1.00
   6  19   0   17.70    1.50
  -6  19   0   15.20    1.60
  -7  19   0    3.30    1.40
   7  19   0    8.00    1.20
   8  19   0    1.20    1.20
  -8  19   0    1.10    1.20
   9  19   0    0.20    1.10
  -9  19   0    1.20    1.50
 -10  19   0    2.30    1.40
  10  19   0    1.80    1.30
   0  20   0  460.75    9.80
   0  20   0  456.15   10.00
  -1  20   0  359.96    7.90
   1  20   0  341.37    7.70
  -1  20   0  359.76    7.50
   1  20   0  336.17    7.60
  -2  20   0    1.40    0.90
  -2  20   0    1.70    0.40
   2  20   0    0.50    0.70
   2  20   0    1.50    0.60
  -3  20   0    0.50    0.80
   3  20   0    1.60    0.70
   3  20   0    1.00    0.60
  -4  20   0   29.20    1.80
   4  20   0   31.90    1.70
  -5  20   0    4.00    1.10
   5  20   0    4.80    1.00
  -6  20   0    3.90    1.30
   6  20   0    3.50    1.00
   7  20   0    0.50    1.10
  -7  20   0    4.00    1.40
   8  20   0    6.80    1.20
  -8  20   0    4.60    1.40
   9  20   0   11.50    1.60
  -9  20   0    7.80    1.70
 -10  20   0    5.00    1.70
   0  21   0    1.50    0.70
   0  21   0    2.50    0.60
  -1  21   0    2.70    0.80
   1  21   0    4.10    0.70
  -1  21   0    2.50    0.50
   1  21   0    4.50    0.80
   2  21   0   15.70    1.10
  -2  21   0   15.80    0.80
   2  21   0   16.00    1.10
  -2  21   0   15.90    1.20
   3  21   0   13.70    0.90
  -3  21   0   12.80    1.20
   3  21   0   13.30    1.20
   4  21   0    2.40    0.80
  -4  21   0    1.70    0.90
   5  21   0    0.70    0.80
  -5  21   0    0.60    1.00
   6  21   0    5.20    1.10
  -6  21   0    6.40    1.30
  -7  21   0    0.30    1.20
   7  21   0    2.20    1.10
  -8  21   0    1.30    1.30
   8  21   0    2.40    1.10
   9  21   0    2.00    1.20
  -9  21   0    2.00    1.60
 -10  21   0   -0.60    2.30
   0  22   0    5.30    0.90
   0  22   0    5.90    0.70
   1  22   0    0.10    0.60
  -1  22   0    0.50    0.50
   1  22   0    1.30    0.70
  -1  22   0    0.90    0.80
  -2  22   0   22.00    1.40
   2  22   0   20.70    1.20
   2  22   0   21.20    1.30
  -3  22   0    7.90    1.20
   3  22   0    9.30    0.80
   3  22   0    9.60    1.00
  -4  22   0   41.40    2.10
   4  22   0   39.70    1.80
  -5  22   0    4.90    1.30
   5  22   0    6.00    1.00
  -6  22   0    2.40    1.20
   6  22   0    3.60    1.00
   7  22   0   20.20    1.70
  -7  22   0   22.00    1.90
  -8  22   0   -1.20    1.20
   8  22   0    1.80    1.20
   9  22   0    5.50    1.40
  -9  22   0    4.90    1.50
   0  23   0    1.60    0.60
   0  23   0    2.00    0.70
  -1  23   0   13.50    0.90
  -1  23   0   16.90    1.30
   1  23   0   13.00    1.00
   1  23   0   11.40    1.00
  -2  23   0    2.50    0.90
   2  23   0    2.10    0.80
   2  23   0    2.40    0.70
  -3  23   0   40.60    2.00
   3  23   0   38.20    1.50
   3  23   0   38.60    1.70
  -4  23   0    2.30    1.00
   4  23   0    1.90    1.00
   5  23   0   19.80    1.60
  -5  23   0   17.80    1.70
  -6  23   0    1.50    1.20
   6  23   0    0.10    0.90
  -7  23   0    2.90    1.30
   7  23   0    5.00    1.20
  -8  23   0    1.40    1.30
   8  23   0   -0.20    1.20
  -9  23   0    4.70    1.50
   9  23   0    5.70    1.50
   0  24   0    8.10    0.80
   0  24   0    8.90    1.00
  -1  24   0   19.00    1.40
  -1  24   0   20.50    1.00
   1  24   0   20.10    1.30
   1  24   0   19.30    1.30
   2  24   0    2.70    0.80
   2  24   0    3.90    0.90
  -2  24   0    3.60    1.10
  -3  24   0    2.20    1.00
   3  24   0    0.80    0.90
  -4  24   0    4.60    1.10
   4  24   0    4.00    1.00
   5  24   0    4.20    1.10
  -5  24   0    3.30    1.20
  -6  24   0   -1.40    1.30
   6  24   0    0.70    1.10
  -7  24   0   -0.30    1.20
   7  24   0    2.10    1.10
   8  24   0    1.90    1.10
  -8  24   0    0.70    1.30
  -9  24   0    0.50    1.60
   9  24   0    1.10    1.40
  -1  25   0   86.89    2.40
   1  25   0   85.09    2.60
  -1  25   0   86.49    2.80
   1  25   0   85.79    2.50
   2  25   0   81.59    2.50
   2  25   0   85.29    2.60
  -2  25   0   80.59    2.80
  -3  25   0   -0.40    1.00
   3  25   0    1.20    1.00
   4  25   0   25.20    1.60
  -4  25   0   23.60    1.80
   5  25   0   15.10    1.40
  -5  25   0   18.30    1.60
   6  25   0    3.20    1.10
  -6  25   0    0.20    1.30
  -7  25   0    3.60    1.40
   7  25   0    5.10    1.40
  -8  25   0    2.30    1.40
   8  25   0    0.80    1.10
  -9  25   0    2.70    1.90
   0  26   0   40.80    1.60
   0  26   0   45.00    2.00
   1  26   0   71.19    2.40
   1  26   0   71.09    2.20
  -1  26   0   68.09    2.50
  -2  26   0   22.40    1.70
   2  26   0   21.70    1.40
   2  26   0   20.60    1.40
  -3  26   0   39.10    2.20
   3  26   0   37.40    1.90
   4  26   0    3.00    1.00
  -4  26   0    1.00    1.20
  -5  26   0    2.70    1.30
   5  26   0    0.80    1.10
   6  26   0    2.70    1.10
  -6  26   0    2.50    1.40
   7  26   0    1.00    1.20
  -7  26   0    2.40    1.40
   8  26   0    2.70    1.40
  -8  26   0    3.50    1.70
   1  27   0    9.60    1.00
  -1  27   0    8.00    1.10
   1  27   0    9.20    1.10
   2  27   0    0.10    0.80
  -2  27   0    0.60    1.10
   2  27   0    1.10    0.90
   3  27   0   26.40    1.60
  -3  27   0   27.50    1.90
  -4  27   0   20.00    1.70
   4  27   0   21.50    1.50
  -5  27   0    3.30    1.40
   5  27   0    2.80    1.10
  -6  27   0    6.90    1.60
   6  27   0    7.10    1.40
  -7  27   0    9.70    1.60
   7  27   0    7.80    1.40
   8  27   0    4.30    1.50
  -8  27   0    8.90    1.90
   0  28   0   21.90    1.40
   0  28   0   23.00    1.60
  -1  28   0   20.60    1.50
   1  28   0   28.10    1.60
   1  28   0   23.90    1.50
  -2  28   0    9.80    1.40
   2  28   0   11.40    1.10
   2  28   0   10.20    1.10
   3  28   0    2.80    0.90
  -3  28   0    4.20    1.20
  -4  28   0    1.60    1.10
   4  28   0    2.20    1.00
  -5  28   0   -0.40    1.30
   5  28   0    0.30    1.00
  -6  28   0    1.10    1.30
   6  28   0    1.00    1.10
  -7  28   0    0.50    1.40
   7  28   0    1.70    1.20
  -8  28   0    1.10    1.70
   8  28   0    0.40    1.30
   0  29   0    3.60    0.80
   0  29   0    5.50    1.10
   1  29   0   17.30    1.30
  -1  29   0   14.80    1.50
   1  29   0   17.40    1.40
   2  29   0  105.59    3.30
  -2  29   0  109.09    3.50
   2  29   0  114.89    3.20
   3  29   0    5.80    1.00
  -3  29   0    6.70    1.30
   4  29   0    1.30    1.00
  -4  29   0    2.40    1.20
  -5  29   0    0.80    1.40
   5  29   0   -0.30    1.10
  -6  29   0   10.10    1.60
   6  29   0   14.80    1.70
   7  29   0    0.70    1.30
  -7  29   0    1.30    1.40
   0  30   0   10.60    1.30
  -1  30   0    5.00    1.20
   1  30   0    1.00    1.00
   1  30   0    4.60    1.00
  -2  30   0    8.00    1.40
   2  30   0    6.10    1.10
  -3  30   0    7.00    1.30
   3  30   0    6.50    1.20
  -4  30   0    1.00    1.20
   4  30   0    1.40    1.10
  -5  30   0    8.90    1.50
   5  30   0    5.20    1.20
   6  30   0    0.90    1.10
  -6  30   0   -0.60    1.30
  -7  30   0   -1.80    1.30
   7  30   0   -0.50    1.10
   0  31   0    2.00    1.10
   1  31   0   15.70    1.40
  -1  31   0   18.80    1.70
   1  31   0   13.40    1.20
  -2  31   0    2.70    1.30
   2  31   0    4.20    0.90
  -3  31   0   34.90    2.20
   3  31   0   40.10    2.10
  -4  31   0    1.00    1.30
   4  31   0    1.50    1.10
  -5  31   0    4.20    1.40
   5  31   0    2.10    1.10
   6  31   0    1.70    1.30
  -6  31   0   -0.10    1.30
   7  31   0   11.00    1.70
  -7  31   0   10.80    1.80
   0  32   0   26.00    1.90
   1  32   0   -1.30    0.90
   1  32   0    1.10    0.90
  -1  32   0    0.70    1.10
   2  32   0    5.40    1.10
  -2  32   0    5.00    1.40
  -3  32   0    8.60    1.40
   3  32   0   10.90    1.30
   4  32   0    0.70    1.10
  -4  32   0   -0.20    1.30
  -5  32   0   -1.90    1.20
   5  32   0    0.70    1.20
   6  32   0    0.80    1.10
  -6  32   0    1.60    1.40
   7  32   0   -0.90    1.30
   0  33   0   -0.80    1.00
  -1  33   0    0.10    1.00
   1  33   0   -0.30    1.00
   1  33   0    1.60    0.90
  -2  33   0    7.60    1.50
   2  33   0    4.00    1.10
  -3  33   0    6.70    1.40
   3  33   0    5.90    1.10
   4  33   0   10.10    1.50
  -4  33   0   11.30    1.70
  -5  33   0    0.10    1.30
   5  33   0    1.30    1.30
   6  33   0    2.60    1.30
  -6  33   0   -0.10    1.40
   0  34   0    1.50    1.10
  -1  34   0    2.40    1.20
   1  34   0    0.70    1.10
   2  34   0    1.70    1.00
  -2  34   0    5.30    1.40
   3  34   0    1.30    1.00
  -3  34   0   -1.10    1.30
   4  34   0    4.00    1.30
  -4  34   0    1.50    1.40
   5  34   0    0.60    1.20
  -5  34   0    2.60    1.40
   6  34   0    1.50    1.30
  -6  34   0    0.90    1.40
   0  35   0    0.50    1.10
  -1  35   0    2.30    1.30
   2  35   0   -1.70    0.90
  -2  35   0   -0.20    1.30
   3  35   0   -0.10    1.10
  -3  35   0    0.80    1.30
  -4  35   0    1.70    1.50
   4  35   0    1.10    1.20
   5  35   0    1.60    1.30
  -5  35   0    1.70    1.40
   6  35   0    4.60    1.50
   0  36   0   54.09    2.60
  -1  36   0   -0.20    1.20
  -2  36   0    0.20    1.30
   2  36   0    1.10    1.00
   3  36   0    5.00    1.20
  -3  36   0    3.80    1.50
   4  36   0    7.30    1.30
  -4  36   0    6.00    1.70
  -5  36   0    2.40    1.50
   5  36   0    0.80    1.30
   0  37   0    1.70    1.20
  -1  37   0    1.90    1.30
  -2  37   0    3.80    1.40
  -3  37   0   -0.30    1.30
   3  37   0    0.40    1.00
  -4  37   0    2.90    1.60
   4  37   0    3.50    1.20
  -5  37   0    3.70    1.70
   5  37   0    1.80    1.40
   0  38   0    4.70    1.40
  -1  38   0    1.80    1.30
  -2  38   0    0.60    1.40
  -3  38   0    1.10    1.40
   3  38   0    2.00    1.20
   4  38   0   10.80    1.60
  -4  38   0    9.90    1.90
   5  38   0    2.00    1.60
  -1  39   0    6.80    1.40
  -2  39   0    7.60    1.60
   3  39   0   10.20    1.40
  -3  39   0    4.60    1.60
   4  39   0    2.90    1.40
  -4  39   0    4.80    1.90
  -1  40   0    7.10    1.60
  -2  40   0    0.10    1.40
  -3  40   0    1.40    1.50
   4  40   0   20.40    1.90
  -1  41   0   21.60    2.10
  -2  41   0    3.10    1.50
  -1  42   0    1.10    1.50
  -2  42   0    0.30    1.30
   9   0  -1    3.50    1.10
   8   0  -1   -0.80    0.90
   8   0  -1    1.80    0.80
   7   0  -1    1.80    0.70
   7   0  -1    2.20    0.90
  -7   0   1    1.60    0.80
   6   0  -1   -0.20    0.60
  -6   0   1    0.80    0.70
   6   0  -1    0.50    0.70
   5   0  -1  111.19    3.00
   5   0  -1  112.39    2.90
  -5   0   1  118.29    3.00
   4   0  -1   -0.50    0.50
   4   0  -1    0.50    0.50
  -4   0   1    0.20    0.60
  -3   0   1   89.89    2.20
   3   0  -1   90.09    2.20
   3   0  -1   89.29    2.20
  -2   0   1   -0.40    0.40
   2   0  -1   -0.30    0.40
   2   0  -1   -0.70    0.40
   1   0  -1   14.60    0.60
  -1   0   1   15.70    0.60
   1   0   1    5.80    0.30
   2   0   1   -0.40    0.40
  -2   0  -1    0.00    0.30
   2   0   1   -0.20    0.30
   3   0   1   20.10    0.80
   3   0   1   20.90    0.90
  -3   0  -1   20.90    0.80
   4   0   1    0.30    0.40
   4   0   1   -0.30    0.50
  -4   0  -1   -0.20    0.50
  -5   0  -1   45.10    1.50
   5   0   1   45.70    1.70
   5   0   1   50.19    1.50
  -6   0  -1   -0.30    0.60
   6   0   1    0.40    0.50
   6   0   1    1.20    0.70
   7   0   1    3.10    0.70
   7   0   1    2.10    0.90
   8   0   1    0.30    0.90
   9   0   1    0.90    1.00
  10   0   1   -0.10    1.20
  11   0   1    4.10    1.50
  10  -1  -1    5.20    1.40
   9  -1  -1   12.30    1.50
   9   1  -1   12.00    1.40
   8  -1  -1    6.20    1.10
   8   1  -1    5.30    1.10
  -8   1   1    5.30    1.10
   8   1  -1    7.70    1.00
   7  -1  -1    0.50    0.70
  -7  -1   1   -0.40    0.80
   7  -1  -1   -0.30    0.70
   7   1  -1    0.40    0.70
   7   1  -1    0.40    0.70
  -7   1   1   -1.00    0.80
   6  -1  -1   24.00    1.40
   6  -1  -1   25.30    1.20
  -6  -1   1   24.30    1.40
   6   1  -1   21.70    1.20
   6   1  -1   21.40    1.30
  -6   1   1   23.70    1.40
   5  -1  -1   84.59    2.50
   5  -1  -1   84.09    2.30
  -5  -1   1   87.49    2.40
   5   1  -1   87.99    2.30
   5   1  -1   87.09    2.40
  -5   1   1   84.09    2.40
   4  -1  -1  156.88    3.60
   4  -1  -1  157.68    3.70
  -4  -1   1  155.18    3.60
   4   1  -1  155.88    3.60
   4   1  -1  151.38    3.60
  -4   1   1  151.88    3.60
  -3  -1   1   11.20    0.80
   3  -1  -1   10.80    0.70
   3  -1  -1   11.80    0.80
   3   1  -1   13.60    0.80
  -3   1   1   11.60    0.80
   3   1  -1   12.00    0.70
  -2  -1   1  368.96    7.70
   2  -1  -1  362.86    7.70
   2  -1  -1  368.56    7.80
   2   1  -1  377.16    7.70
   2   1  -1  365.46    7.70
  -2   1   1  371.86    7.80
  -1  -1   1  824.42   16.90
   1   1  -1  813.02   16.90
  -1   1   1  837.62   17.00
   0   1  -1    4.50    0.30
   1  -1   1  330.47    6.90
   1  -1   1  334.07    6.90
   1   1   1  337.87    6.90
  -1   1  -1  332.27    6.90
   2  -1   1   50.69    1.40
  -2  -1  -1   50.79    1.20
   2  -1   1   50.29    1.20
  -2   1  -1   51.99    1.30
   2   1   1   48.90    1.30
   2   1   1   52.09    1.40
   3  -1   1  135.09    2.90
  -3  -1  -1  136.09    3.00
   3  -1   1  132.89    3.20
  -3   1  -1  131.59    3.00
   3   1   1  128.99    3.00
   3   1   1  133.69    3.20
   4  -1   1  136.89    3.40
   4  -1   1  135.39    3.10
  -4  -1  -1  137.39    3.20
   4   1   1  141.99    3.20
  -4   1  -1  137.89    3.20
   4   1   1  137.09    3.40
   5  -1   1   33.70    1.40
  -5  -1  -1   32.50    1.30
   5  -1   1   35.20    1.20
   5   1   1   33.80    1.20
   5   1   1   34.90    1.40
  -5   1  -1   33.70    1.30
   6  -1   1    7.90    1.00
   6  -1   1    9.00    0.80
  -6  -1  -1    7.70    0.80
   6   1   1    6.80    1.00
   6   1   1    9.20    0.80
  -6   1  -1    8.90    0.80
   7  -1   1    1.20    0.80
   7  -1   1    0.00    1.00
   7   1   1    1.70    0.80
   7   1   1    1.70    0.70
   8  -1   1    3.00    1.10
   8   1   1    4.50    1.10
   9  -1   1    4.00    1.10
   9   1   1    5.30    1.20
  10  -1   1    7.10    1.50
  10   1   1    9.50    1.50
  11  -1   1    9.50    1.70
  11   1   1    9.20    1.70
  10  -2  -1    0.10    1.10
   9  -2  -1    1.40    1.10
   9   2  -1    0.20    1.10
   8  -2  -1   53.09    2.30
   8   2  -1   56.59    2.30
   8   2  -1   57.79    2.10
  -8   2   1   54.49    2.20
   7  -2  -1    1.70    0.90
   7  -2  -1    2.90    0.70
  -7  -2   1    1.90    0.80
   7   2  -1    1.00    0.70
   7   2  -1    1.90    0.90
  -7   2   1    0.80    0.80
  -6  -2   1    6.60    0.80
   6  -2  -1    5.70    0.70
   6  -2  -1    6.90    1.00
   6   2  -1    6.00    0.80
  -6   2   1    6.10    0.90
   6   2  -1    5.90    0.80
  -5  -2   1   88.69    2.50
   5  -2  -1   91.59    2.40
   5  -2  -1   90.69    2.60
  -5   2   1   93.29    2.50
   5   2  -1   91.99    2.50
   5   2  -1   93.29    2.50
   4  -2  -1    5.60    0.60
  -4  -2   1    7.70    0.70
   4  -2  -1    7.20    0.80
   4   2  -1    5.50    0.60
  -4   2   1    5.80    0.70
   4   2  -1    6.60    0.70
   3  -2  -1   10.20    0.70
  -3  -2   1    7.70    0.60
   3  -2  -1    7.90    0.60
  -3   2   1    9.60    0.70
   3   2  -1    8.70    0.60
   3   2  -1    7.00    0.60
  -2  -2   1   37.50    1.10
   2  -2  -1   38.00    1.20
   2   2  -1   38.90    1.00
  -2   2   1   38.70    1.20
   2   2  -1   37.30    1.10
  -1   2   1    0.50    0.30
   1   2  -1    0.30    0.30
   1   2  -1    0.80    0.30
   0   2  -1   -0.30    0.20
   1  -2   1  232.58    4.90
  -1   2  -1  229.68    4.90
   1   2   1  236.28    4.90
   2  -2   1  306.77    6.60
   2  -2   1  309.57    6.40
  -2  -2  -1  305.97    6.30
  -2   2  -1  310.37    6.50
   2   2   1  305.47    6.50
   3  -2   1   66.09    1.60
   3  -2   1   66.19    1.90
  -3  -2  -1   64.49    1.60
   3   2   1   66.49    1.80
  -3   2  -1   63.29    1.70
   3   2   1   64.29    1.70
  -4  -2  -1  246.58    5.30
   4  -2   1  248.08    5.30
   4  -2   1  247.68    5.60
   4   2   1  246.08    5.60
   4   2   1  244.98    5.40
  -4   2  -1  244.88    5.40
   5  -2   1   60.19    2.00
  -5  -2  -1   59.39    1.70
   5  -2   1   63.09    1.70
   5   2   1   58.39    2.00
   5   2   1   62.69    1.80
  -5   2  -1   58.99    1.80
  -6  -2  -1   11.90    0.90
   6  -2   1   12.60    1.20
   6  -2   1   12.90    0.80
   6   2   1   12.50    1.10
  -6   2  -1   14.50    1.00
   6   2   1   13.00    0.90
   7  -2   1    0.10    0.90
  -7   2  -1    0.10    0.80
   7   2   1   -0.30    0.80
   7   2   1   -0.40    0.70
   8  -2   1   12.00    1.40
   8   2   1   12.80    1.40
   9  -2   1    1.50    1.00
   9   2   1    2.10    1.00
  10  -2   1    1.10    1.30
  10   2   1   -1.30    1.20
  11  -2   1    0.40    1.30
  10  -3  -1    2.90    1.30
   9  -3  -1   -0.40    0.90
   9   3  -1   -0.70    1.10
   8  -3  -1   -0.30    0.80
  -8   3   1   -0.10    0.90
   8   3  -1    0.50    0.90
   8   3  -1    0.90    0.80
  -7  -3   1    1.50    0.80
   7  -3  -1    1.00    0.90
   7  -3  -1    0.70    0.70
  -7   3   1    1.20    0.80
   7   3  -1    0.60    0.70
   7   3  -1    0.20    0.80
   6  -3  -1   32.40    1.60
   6  -3  -1   33.60    1.30
  -6  -3   1   33.40    1.40
  -6   3   1   35.40    1.60
   6   3  -1   32.70    1.50
   6   3  -1   33.30    1.50
   5  -3  -1   99.39    2.60
  -5  -3   1  101.29    2.60
   5  -3  -1  104.09    2.80
   5   3  -1  102.09    2.70
   5   3  -1  105.59    2.70
  -5   3   1   97.49    2.70
  -4  -3   1  137.29    3.20
   4  -3  -1  130.59    3.30
   4  -3  -1  132.99    3.10
   4   3  -1  135.59    3.20
   4   3  -1  133.99    3.20
  -4   3   1  133.79    3.30
   3  -3  -1   30.10    1.10
  -3  -3   1   29.30    1.10
   3  -3  -1   28.80    1.00
   3   3  -1   30.90    1.00
  -3   3   1   30.30    1.20
   3   3  -1   31.20    1.10
   2  -3  -1    0.40    0.40
  -2  -3   1    1.30    0.40
  -2   3   1    1.10    0.40
   2   3  -1    1.10    0.30
   2   3  -1    1.10    0.40
   1   3  -1   10.00    0.50
  -1   3   1   10.90    0.60
   1   3  -1   11.00    0.50
   0   3  -1    1.20    0.20
   0   3   1    1.00    0.20
   0   3   1    1.10    0.20
   0   3  -1    1.40    0.30
   1  -3   1   18.50    0.70
   1   3   1   18.50    0.70
  -1   3  -1   19.50    0.70
   2  -3   1  249.18    5.50
   2  -3   1  252.97    5.20
   2   3   1  252.87    5.40
  -2   3  -1  259.37    5.40
   3  -3   1   70.89    2.00
   3  -3   1   74.49    1.70
  -3  -3  -1   72.29    1.70
   3   3   1   74.59    1.90
   3   3   1   71.89    1.80
  -3   3  -1   74.69    1.90
   4  -3   1   51.69    1.40
  -4  -3  -1   51.39    1.40
   4  -3   1   52.89    1.80
  -4   3  -1   50.59    1.60
   4   3   1   51.09    1.60
   4   3   1   49.30    1.70
   5  -3   1   33.90    1.50
  -5  -3  -1   36.70    1.20
   5  -3   1   36.10    1.20
   5   3   1   37.20    1.30
  -5   3  -1   36.50    1.40
   5   3   1   35.60    1.50
   6  -3   1   -0.20    0.70
   6  -3   1    1.20    0.50
  -6  -3  -1   -0.20    0.50
   6   3   1    0.70    0.70
  -6   3  -1   -0.20    0.60
   6   3   1   -0.40    0.60
   7  -3   1   28.60    1.80
   7   3   1   30.90    1.40
  -7   3  -1   27.40    1.60
   7   3   1   24.70    1.60
   8  -3   1    2.50    1.00
   8   3   1    2.60    0.90
   8   3   1    0.00    0.90
   9  -3   1    1.00    1.00
   9   3   1   -0.60    0.90
  10  -3   1    1.40    1.20
  10   3   1    1.80    1.30
  11  -3   1    6.80    1.70
  10  -4  -1    1.60    1.30
   9  -4  -1    0.60    1.00
   9   4  -1    0.70    1.00
   8  -4  -1   -1.30    0.80
  -8   4   1   -1.50    0.90
   8   4  -1   -0.70    0.80
   8   4  -1    0.80    0.90
   7  -4  -1   -0.30    0.80
   7  -4  -1    1.50    0.60
  -7  -4   1    0.90    0.80
  -7   4   1    0.70    0.90
   7   4  -1   -0.40    0.70
   7   4  -1    0.70    0.80
   6  -4  -1    0.60    0.50
   6  -4  -1    1.20    0.70
  -6  -4   1    0.00    0.60
   6   4  -1    0.50    0.70
  -6   4   1   -0.50    0.60
   6   4  -1    0.10    0.60
  -5  -4   1    2.80    0.60
   5  -4  -1    3.30    0.80
   5  -4  -1    2.50    0.50
   5   4  -1    3.10    0.60
   5   4  -1    3.70    0.60
  -5   4   1    2.50    0.70
   4  -4  -1   16.40    1.10
  -4  -4   1   16.60    1.00
   4  -4  -1   15.00    0.80
   4   4  -1   15.60    0.90
   4   4  -1   15.50    0.90
  -4   4   1   14.70    1.00
   3  -4  -1  350.76    7.60
  -3  -4   1  343.17    7.40
   3   4  -1  359.76    7.40
  -3   4   1  348.57    7.50
   3   4  -1  342.67    7.50
  -2  -4   1   39.20    1.10
  -2   4   1   38.00    1.20
   2   4  -1   39.80    1.20
   2   4  -1   39.80    1.00
  -1   4   1 1940.11   41.10
   1   4  -1 2046.10   41.20
   1   4  -1 1996.70   41.20
   0   4   1 2737.43   56.39
   0   4  -1 2812.42   56.79
   0   4  -1 2706.73   56.29
   0   4   1 2725.83   56.49
  -1   4  -1 2320.37   48.30
   1   4   1 2367.46   48.50
   2  -4   1   21.20    0.90
  -2   4  -1   19.60    0.80
   2   4   1   20.30    0.80
   3  -4   1  132.49    3.30
  -3  -4  -1  135.79    2.90
   3  -4   1  138.29    2.90
   3   4   1  136.99    3.10
   3   4   1  134.29    3.20
  -3   4  -1  131.99    3.10
  -4  -4  -1  115.09    2.60
   4  -4   1  114.29    3.00
   4  -4   1  116.79    2.60
  -4   4  -1  111.99    2.80
   4   4   1  109.69    2.90
   4   4   1  112.09    2.80
   5  -4   1    5.10    0.80
  -5  -4  -1    5.60    0.60
   5  -4   1    5.50    0.50
  -5   4  -1    5.40    0.70
   5   4   1    6.50    0.70
   5   4   1    6.60    0.80
   6  -4   1   10.60    0.70
   6  -4   1    9.90    1.10
  -6   4  -1    8.50    0.90
   6   4   1    7.10    0.80
   6   4   1    9.60    1.00
   7  -4   1    0.10    0.80
  -7   4  -1    0.80    0.80
   7   4   1   -0.20    0.70
   7   4   1    0.20    0.70
   8  -4   1    2.40    1.10
   8   4   1    4.90    0.90
   8   4   1    3.50    1.10
   9  -4   1   -0.90    1.00
   9   4   1    0.10    0.90
  10  -4   1    8.20    1.50
  10   4   1    8.00    1.40
  11  -4   1   19.40    2.00
  10  -5  -1   -0.20    1.20
   9  -5  -1    3.00    1.20
   9   5  -1    2.20    1.00
   8  -5  -1   12.00    1.40
   8   5  -1    9.20    1.10
   8   5  -1   12.70    1.20
  -8   5   1   13.60    1.40
   7  -5  -1    7.70    1.20
  -7  -5   1    9.40    1.10
   7   5  -1    6.10    1.00
   7   5  -1    9.50    1.10
  -7   5   1    9.20    1.20
   6  -5  -1    0.30    0.70
  -6  -5   1    0.10    0.60
   6   5  -1   -0.20    0.60
  -6   5   1    0.00    0.80
   6   5  -1   -0.20    0.60
  -5  -5   1  124.49    3.10
   5  -5  -1  126.69    3.30
   5   5  -1  129.39    3.20
  -5   5   1  127.49    3.30
   5   5  -1  126.29    3.20
  -4  -5   1   24.40    1.00
   4  -5  -1   24.20    1.30
   4   5  -1   24.00    1.10
   4   5  -1   22.60    1.00
  -4   5   1   24.80    1.30
   3  -5  -1   30.80    1.20
  -3  -5   1   34.30    1.10
   3   5  -1   32.10    1.10
   3   5  -1   34.60    1.00
  -3   5   1   36.00    1.30
   2   5  -1   80.39    2.00
  -2   5   1   84.99    2.10
   2   5  -1   82.49    2.00
   2   5  -1   82.29    1.80
   1   5  -1  797.12   16.60
  -1   5   1  804.02   16.70
   1   5  -1  829.52   16.60
   0  -5   1    5.50    0.30
   0   5  -1    4.80    0.30
   0   5   1    5.60    0.40
   0   5  -1    5.70    0.50
   0   5   1    5.70    0.40
   1  -5   1  638.74   13.20
  -1   5  -1  645.14   13.20
   1   5   1  632.04   13.20
   2  -5   1  224.58    4.90
  -2   5  -1  224.28    4.90
   2   5   1  223.98    4.80
   3  -5   1   18.10    1.00
  -3  -5  -1   19.50    0.70
   3  -5   1   19.70    0.60
   3   5   1   19.20    0.90
  -3   5  -1   17.80    1.00
   4  -5   1   11.30    0.60
   4  -5   1   11.20    0.90
  -4  -5  -1   10.00    0.70
   4   5   1   10.30    0.80
   4   5   1   11.40    0.80
  -4   5  -1   11.40    0.90
  -5  -5  -1   41.50    1.30
   5  -5   1   42.60    1.70
   5  -5   1   43.60    1.30
   5   5   1   42.60    1.50
   5   5   1   42.30    1.60
  -5   5  -1   40.50    1.60
   6  -5   1    3.80    0.90
   6   5   1    4.80    0.80
  -6   5  -1    4.90    0.90
   6   5   1    3.90    0.90
   7  -5   1    1.50    0.90
   7   5   1    2.60    0.90
  -7   5  -1    2.00    0.90
   7   5   1    2.40    0.80
   8  -5   1    9.20    1.30
   8   5   1   10.80    1.30
   8   5   1   10.20    1.10
   9  -5   1    2.90    1.30
   9   5   1    2.60    1.10
  10  -5   1    6.50    1.40
  10   5   1    5.70    2.20
  11  -5   1   35.80    2.70
  10  -6  -1    2.40    1.40
   9  -6  -1    6.80    1.40
   9   6  -1    7.50    1.20
   8  -6  -1   41.20    2.20
  -8   6   1   38.00    2.10
   8   6  -1   39.50    1.90
   8   6  -1   43.20    2.30
   7  -6  -1   24.40    1.60
   7   6  -1   24.40    1.50
   7   6  -1   25.50    1.50
  -7   6   1   23.90    1.70
  -6  -6   1    8.80    0.80
   6  -6  -1    6.40    1.00
   6   6  -1    8.10    0.90
   6   6  -1    8.20    0.90
  -6   6   1    7.50    1.00
   5  -6  -1   24.90    1.30
  -5  -6   1   25.80    1.20
   5   6  -1   27.50    1.10
   5   6  -1   27.30    1.30
  -5   6   1   24.80    1.40
  -4  -6   1   94.39    2.40
   4  -6  -1   94.09    2.60
  -4   6   1   96.29    2.60
   4   6  -1   97.09    2.40
   4   6  -1   94.89    2.50
  -3  -6   1   82.59    2.00
   3  -6  -1   77.49    2.20
   3   6  -1   81.89    1.90
   3   6  -1   80.79    2.10
  -3   6   1   77.39    2.20
  -2   6   1    0.40    0.40
   2   6  -1   -0.20    0.40
   2   6  -1    0.80    0.20
   2   6  -1    1.40    0.40
  -1   6   1   35.30    1.10
   1   6  -1   33.30    1.00
   0   6   1    2.60    0.30
   0   6  -1    2.60    0.50
   0   6  -1    2.80    0.30
   0   6   1    4.00    0.40
   1  -6   1   40.30    1.20
   1   6   1   40.60    1.10
  -1   6  -1   41.20    1.20
   1   6   1   41.00    1.00
   2  -6   1   20.10    0.90
  -2   6  -1   21.40    0.90
   2   6   1   20.80    0.90
   3  -6   1   84.99    1.90
   3  -6   1   83.69    2.30
  -3  -6  -1   85.89    1.90
  -3   6  -1   80.79    2.20
   3   6   1   86.09    2.20
   4  -6   1  150.28    3.20
  -4  -6  -1  148.29    3.20
   4  -6   1  146.19    3.70
  -4   6  -1  142.29    3.50
   4   6   1  145.59    3.50
   4   6   1  142.09    3.50
  -5  -6  -1    0.50    0.40
   5  -6   1    0.90    0.70
   5  -6   1    1.30    0.40
  -5   6  -1    0.60    0.70
   5   6   1    2.50    0.60
   5   6   1    2.10    0.70
   6  -6   1   28.00    1.70
  -6   6  -1   32.40    1.60
   6   6   1   32.70    1.50
   6   6   1   29.60    1.40
   7  -6   1   14.70    1.40
   7   6   1   15.20    1.20
   7   6   1   15.00    1.30
  -7   6  -1   16.30    1.30
   8  -6   1   14.00    1.60
   8   6   1   18.10    1.50
   8   6   1   16.30    1.30
   9  -6   1   -0.10    1.20
   9   6   1    0.30    1.00
  10  -6   1    0.80    1.30
  11  -6   1    0.50    1.50
   9  -7  -1    5.00    1.30
  -9   7   1    5.30    1.30
   9   7  -1    6.50    1.10
   8  -7  -1    8.50    1.40
   8   7  -1    6.70    1.00
  -8   7   1    5.80    1.20
   7  -7  -1    5.50    1.20
   7   7  -1    4.50    1.00
   7   7  -1    3.30    0.80
  -7   7   1    4.30    1.10
  -6  -7   1    1.80    0.70
   6  -7  -1    3.20    1.00
   6   7  -1    2.80    0.70
   6   7  -1    1.50    0.70
  -6   7   1    2.30    0.90
  -5  -7   1    9.00    0.80
   5  -7  -1    9.30    1.00
  -5   7   1    9.10    0.90
   5   7  -1    9.10    0.80
   5   7  -1   10.50    0.90
  -4  -7   1    1.00    0.50
   4  -7  -1    0.80    0.60
   4   7  -1   -0.30    0.60
  -4   7   1   -0.50    0.60
   4   7  -1    0.90    0.50
  -3  -7   1   46.00    1.40
   3   7  -1   49.00    1.50
  -3   7   1   51.09    1.70
   3   7  -1   46.90    1.30
  -2   7   1    2.40    0.50
   2   7  -1    3.30    0.30
   2   7  -1    3.60    0.50
   2   7  -1    2.90    0.50
  -1   7   1   15.80    0.60
   1   7  -1   16.50    0.80
   1   7  -1   16.70    0.70
  -1   7   1   16.80    0.80
   0   7   1    0.10    0.30
   0   7  -1    0.20    0.40
   0   7   1    0.30    0.40
   0   7  -1   -0.20    0.30
   1  -7   1  473.55    9.80
   1   7   1  475.05    9.80
   1   7   1  461.75    9.70
  -1   7  -1  476.55    9.90
   2  -7   1  350.56    7.50
   2   7   1  362.26    7.40
  -2   7  -1  350.46    7.50
   2   7   1  334.67    7.20
   3  -7   1   19.30    1.10
  -3  -7  -1   20.30    0.70
   3   7   1   18.70    1.00
  -3   7  -1   19.70    1.10
  -4  -7  -1  116.69    2.60
   4  -7   1  115.79    3.00
   4  -7   1  112.69    2.50
   4   7   1  111.69    2.80
   4   7   1  112.59    2.80
  -4   7  -1  109.59    2.90
  -5  -7  -1    1.80    0.40
   5  -7   1    1.80    0.70
   5  -7   1    2.20    0.40
   5   7   1    1.80    0.70
  -5   7  -1    4.10    0.80
   5   7   1    1.30    0.60
   6  -7   1    0.20    0.80
   6   7   1    1.30    0.70
   6   7   1    0.00    0.70
  -6   7  -1   -0.10    0.80
   7  -7   1    6.10    1.20
   7   7   1    5.00    1.00
   7   7   1    6.00    1.00
  -7   7  -1    6.50    1.10
   8  -7   1    2.30    1.10
   8   7   1    3.00    1.00
   8   7   1    1.20    0.90
   9  -7   1    4.00    1.40
   9   7   1    1.40    1.10
  10  -7   1    3.60    1.50
  11  -7   1    1.80    1.60
   9  -8  -1    0.30    1.20
  -9   8   1   -1.60    1.10
   9   8  -1   -0.20    0.80
   8  -8  -1    0.60    1.10
  -8   8   1    0.70    1.10
   8   8  -1    0.10    0.80
   7  -8  -1    3.70    1.00
   7   8  -1    2.20    0.80
  -7   8   1    3.10    1.10
   7   8  -1    3.00    0.80
   6  -8  -1   33.00    1.70
  -6  -8   1   31.90    1.40
   6   8  -1   32.40    1.40
   6   8  -1   31.60    1.60
  -6   8   1   30.30    1.60
  -5  -8   1   46.70    1.50
   5  -8  -1   47.30    1.90
  -5   8   1   45.60    1.80
   5   8  -1   45.00    1.60
   5   8  -1   46.80    1.50
   4  -8  -1   12.50    1.00
  -4  -8   1   15.80    0.90
   4   8  -1   14.70    0.80
  -4   8   1   15.50    1.10
   4   8  -1   13.10    0.90
  -3  -8   1    5.70    0.50
   3   8  -1    4.20    0.60
  -3   8   1    4.00    0.70
   3   8  -1    5.70    0.50
   2   8  -1  243.68    5.20
  -2   8   1  240.78    5.40
   2   8  -1  241.08    5.30
   1   8  -1   14.40    0.70
  -1   8   1   14.30    0.50
   1   8  -1   13.30    0.70
   0   8   1  659.13   14.30
   0   8   1  704.23   14.40
   0   8  -1  716.23   14.40
   0   8  -1  705.53   14.30
   1  -8   1    6.50    0.50
   1   8   1    6.40    0.40
   1   8   1    7.30    0.50
  -1   8  -1    6.00    0.30
  -1   8  -1    6.90    0.60
   2  -8   1   63.39    1.80
   2   8   1   67.09    1.50
   2   8   1   68.79    1.80
  -2   8  -1   68.39    1.90
   3  -8   1    9.30    0.80
  -3  -8  -1   10.30    0.50
  -3   8  -1   10.70    0.90
   3   8   1    9.70    0.80
  -4  -8  -1    3.50    0.40
   4  -8   1    3.40    0.70
  -4   8  -1    3.00    0.70
   4   8   1    3.40    0.60
   4   8   1    3.50    0.70
   5  -8   1   70.29    2.20
   5   8   1   64.49    2.00
  -5   8  -1   65.19    2.10
   5   8   1   59.69    2.00
   6  -8   1    1.90    0.80
   6   8   1    2.10    0.80
   6   8   1    4.00    0.80
  -6   8  -1    3.20    0.90
   7  -8   1   39.60    2.10
   7   8   1   43.00    1.90
   7   8   1   36.10    1.70
  -7   8  -1   36.30    1.90
   8  -8   1    1.80    1.20
  -8   8  -1   -0.10    1.00
   8   8   1    0.30    0.90
   8   8   1    0.90    0.90
   9  -8   1   13.50    1.60
   9   8   1   14.80    1.40
   9   8   1   15.10    1.50
  10  -8   1   14.40    1.90
  10   9  -1   -0.80    1.00
  -9   9   1    3.90    1.20
   9   9  -1    3.20    1.00
   8  -9  -1    3.60    1.10
   8   9  -1    4.70    1.00
  -8   9   1    2.80    1.20
   7  -9  -1   29.00    1.80
   7   9  -1   27.80    1.50
  -7   9   1   24.80    1.60
   6  -9  -1  112.39    3.30
  -6  -9   1  108.69    2.90
  -6   9   1  111.19    3.30
   6   9  -1  108.79    2.90
   6   9  -1  106.99    3.10
   5  -9  -1   21.30    1.40
  -5  -9   1   21.00    1.10
  -5   9   1   20.90    1.40
   5   9  -1   17.30    1.10
   5   9  -1   18.70    1.00
  -4  -9   1    6.40    0.60
   4   9  -1    7.50    0.60
  -4   9   1    5.30    0.80
   4   9  -1    4.90    0.70
  -3   9   1    6.40    0.80
   3   9  -1    7.30    0.60
   3   9  -1    6.90    0.70
   3   9  -1    6.90    0.50
  -2   9   1   78.29    2.10
   2   9  -1   75.69    2.00
   2   9  -1   77.79    1.90
  -1   9   1    3.60    0.30
   1   9  -1    4.40    0.50
  -1   9   1    3.80    0.50
   1   9  -1    3.90    0.40
   0   9   1  286.47    6.10
   0   9  -1  287.87    6.20
   0   9  -1  283.87    6.00
   0   9   1  285.97    6.10
   1  -9   1   58.99    1.60
   1   9   1   61.89    1.60
   1   9   1   62.39    1.50
  -1   9  -1   61.69    1.70
  -1   9  -1   63.89    1.40
   2  -9   1   84.49    2.20
   2   9   1   85.49    1.90
   2   9   1   83.29    2.10
  -2   9  -1   87.99    2.30
  -3  -9  -1   38.30    1.00
   3  -9   1   36.80    1.50
   3   9   1   34.50    1.30
  -3   9  -1   35.80    1.40
  -4  -9  -1   11.80    0.60
   4  -9   1   11.00    1.00
  -4   9  -1   12.20    1.00
   4   9   1   12.70    0.90
   5  -9   1   38.20    1.70
   5   9   1   39.70    1.60
   5   9   1   35.80    1.40
  -5   9  -1   37.90    1.70
   6  -9   1   19.30    1.40
   6   9   1   21.70    1.30
  -6   9  -1   20.40    1.40
   6   9   1   19.80    1.20
   7  -9   1    1.20    0.90
   7   9   1    1.10    0.80
   7   9   1    3.20    0.90
  -7   9  -1    2.50    1.00
   8  -9   1    2.40    1.10
   8   9   1    3.20    1.00
   8   9   1    3.90    1.00
  -8   9  -1    3.50    1.10
   9  -9   1    8.00    1.40
   9   9   1    8.70    1.20
  10  -9   1    3.20    1.50
  10  10  -1    2.80    1.20
  -9  10   1    8.10    1.50
   9  10  -1    7.90    1.30
   8  10  -1    0.90    0.90
  -8  10   1    0.20    1.10
   7 -10  -1   95.29    3.20
   7  10  -1   87.99    2.90
  -7  10   1   90.79    3.00
  -6 -10   1  184.88    4.30
   6 -10  -1  183.68    4.90
  -6  10   1  186.28    4.70
   6  10  -1  183.58    4.60
   6  10  -1  182.48    4.40
  -5 -10   1    0.80    0.50
   5  10  -1    0.50    0.50
  -5  10   1    0.80    0.70
   5  10  -1    0.50    0.60
  -4 -10   1   19.80    0.90
  -4  10   1   21.30    1.40
   4  10  -1   19.60    1.10
   4  10  -1   20.50    0.90
   3  10  -1   13.00    0.80
   3  10  -1   13.80    0.70
   3  10  -1   13.10    0.90
  -3  10   1   11.90    0.90
  -2  10   1  542.95   11.40
   2  10  -1  537.35   11.30
   2  10  -1  535.75   11.30
  -1  10   1   18.50    0.70
   1  10  -1   18.00    0.90
   1  10  -1   20.70    0.80
  -1  10   1   18.30    1.00
   0  10   1    0.30    0.40
   0  10  -1   -0.60    0.30
   0  10   1    0.20    0.30
   0  10  -1   -0.50    0.50
  -1  10  -1   45.50    1.50
  -1  10  -1   44.30    1.10
   1  10   1   44.70    1.20
   1  10   1   45.60    1.30
   2 -10   1   22.20    1.00
   2  10   1   23.00    0.70
  -2  10  -1   21.90    1.10
   2  10   1   23.40    1.10
   3 -10   1   42.70    1.50
   3  10   1   40.30    1.40
  -3  10  -1   40.60    1.60
  -4 -10  -1    0.20    0.30
   4 -10   1   -0.20    0.60
   4  10   1   -0.50    0.50
  -4  10  -1    1.80    0.70
   5 -10   1   -0.50    0.70
   5  10   1    0.30    0.60
   5  10   1   -0.70    0.50
  -5  10  -1    0.90    0.80
   6 -10   1  133.09    3.90
   6  10   1  139.09    3.60
   6  10   1  138.29    3.60
  -6  10  -1  132.69    3.70
   7 -10   1   68.69    2.60
  -7  10  -1   73.99    2.60
   7  10   1   67.49    2.40
   7  10   1   72.59    2.40
   8 -10   1   -0.20    1.10
   8  10   1    1.20    0.90
   8  10   1    1.60    1.00
  -8  10  -1    0.50    1.00
   9 -10   1    2.10    1.20
   9  10   1    3.50    1.10
  10 -10   1    1.10    1.40
  10  11  -1   10.40    1.40
  -9  11   1    2.80    1.40
   9  11  -1    3.50    1.20
  -8  11   1    8.50    1.40
   8  11  -1    7.10    1.20
  -7  11   1   18.70    1.60
   7  11  -1   17.60    1.40
   6  11  -1  177.68    4.20
  -6  11   1  174.88    4.60
   6  11  -1  168.98    4.40
  -5 -11   1    1.30    0.50
  -5  11   1    0.90    0.70
   5  11  -1    1.60    0.50
   5  11  -1    2.00    0.70
  -4 -11   1    0.20    0.50
   4  11  -1    0.60    0.60
  -4  11   1    0.50    0.70
   4  11  -1    1.20    0.40
   3  11  -1   19.00    1.10
  -3  11   1   20.30    1.30
   3  11  -1   19.30    0.90
   2  11  -1   11.50    0.80
  -2  11   1   10.40    0.60
  -2  11   1   10.10    0.80
   2  11  -1   10.20    0.70
  -1  11   1   54.19    1.40
   1  11  -1   54.39    1.60
  -1  11   1   53.59    1.60
   1  11  -1   54.49    1.50
   0  11   1   30.30    1.10
   0  11  -1   32.00    1.00
   0  11   1   32.00    1.00
   0  11  -1   31.30    1.20
  -1  11  -1   71.49    1.60
   1  11   1   71.69    1.80
   1  11   1   69.89    1.80
  -1  11  -1   70.69    2.00
   2 -11   1  206.78    4.70
   2  11   1  203.78    4.40
   2  11   1  201.78    4.60
  -2  11  -1  204.78    4.70
   3 -11   1    1.10    0.60
  -3  11  -1    1.90    0.70
   3  11   1    1.10    0.30
   3  11   1    1.80    0.60
  -4 -11  -1   12.20    0.60
   4 -11   1   12.60    1.10
   4  11   1   13.60    0.90
  -4  11  -1   11.90    1.00
   5 -11   1    8.60    1.00
   5  11   1    9.50    1.00
  -5  11  -1    8.80    1.00
   5  11   1    8.40    0.80
   6 -11   1  131.79    3.80
   6  11   1  131.29    3.60
  -6  11  -1  134.69    3.70
   6  11   1  135.59    3.50
   7 -11   1  131.79    4.00
   7  11   1  137.59    3.80
  -7  11  -1  142.09    3.90
   7  11   1  137.29    3.80
   8 -11   1    1.50    1.10
   8  11   1    0.10    0.90
  -8  11  -1    0.80    1.10
   8  11   1    0.80    0.90
   9 -11   1    1.20    1.30
   9  11   1    0.00    0.90
  10 -11   1    1.60    1.50
  10  12  -1    3.60    1.20
  -9  12   1    0.20    1.30
   9  12  -1    0.50    1.00
  -8  12   1   -0.90    1.00
   8  12  -1   -0.30    0.90
   7  12  -1    0.90    0.80
  -7  12   1    0.50    1.10
   6  12  -1   63.49    2.20
  -6  12   1   57.89    2.40
  -5 -12   1   30.50    1.20
   5  12  -1   31.40    1.50
   5  12  -1   30.20    1.20
  -5  12   1   31.60    1.60
  -4 -12   1   18.90    0.90
  -4  12   1   18.30    1.20
   4  12  -1   19.20    0.90
   4  12  -1   18.30    1.10
  -3  12   1  211.28    4.90
   3  12  -1  205.38    4.80
   3  12  -1  209.98    4.70
   2  12  -1  289.87    6.50
   2  12  -1  301.57    6.50
  -2  12   1  304.77    6.30
  -2  12   1  304.07    6.70
   1  12  -1  243.08    5.30
  -1  12   1  250.57    5.20
  -1  12   1  239.18    5.40
   1  12  -1  235.98    5.30
   0  12   1    5.40    0.50
   0  12  -1    3.60    0.60
   0  12   1    4.20    0.60
   0  12  -1    4.30    0.40
   1  12   1  205.18    4.60
  -1  12  -1  209.48    4.40
  -1  12  -1  198.28    4.70
   1  12   1  213.78    4.50
   2 -12   1   84.59    2.30
   2  12   1   86.49    2.30
  -2  12  -1   87.19    1.80
  -2  12  -1   79.19    2.30
   2  12   1   87.59    2.00
   3 -12   1    0.00    0.70
   3  12   1   -0.20    0.60
  -3  12  -1   -0.10    0.70
   3  12   1   -0.10    0.30
   4 -12   1   22.10    1.40
  -4 -12  -1   25.80    0.80
  -4  12  -1   22.40    1.40
   4  12   1   23.90    1.20
   5  12   1  102.59    2.90
   5  12   1  106.59    2.80
  -5  12  -1   98.09    2.90
   6 -12   1   46.60    2.10
   6  12   1   45.30    1.80
   6  12   1   50.39    1.90
  -6  12  -1   45.60    2.00
   7 -12   1    1.00    1.10
   7  12   1    0.30    0.90
  -7  12  -1    2.60    1.10
   7  12   1    1.40    0.80
   8 -12   1   14.90    1.60
   8  12   1   20.80    1.60
  -8  12  -1   19.50    1.70
   9 -12   1    4.90    1.50
   9  12   1    3.70    1.10
  10 -12   1    1.30    1.50
  10  13  -1   -1.60    0.90
  -9  13   1    6.10    1.50
   9  13  -1    6.00    1.30
   8  13  -1    5.40    1.10
  -8  13   1    5.80    1.40
   7  13  -1    7.60    1.10
  -7  13   1    7.00    1.20
  -6  13   1  187.48    4.90
   6  13  -1  188.78    4.70
  -5 -13   1   25.40    1.10
   5  13  -1   25.30    1.50
   5  13  -1   26.50    1.10
  -5  13   1   22.10    1.60
  -4  13   1    7.90    0.90
   4  13  -1    6.20    0.80
   4  13  -1    7.40    0.60
  -3  13   1   50.99    1.80
   3  13  -1   51.99    1.60
   3  13  -1   54.49    1.70
   2  13  -1    3.80    0.60
  -2  13   1    3.80    0.70
  -2  13   1    4.40    0.40
   2  13  -1    4.10    0.70
   1  13  -1    5.70    0.60
  -1  13   1    6.20    0.50
   1  13  -1    6.30    0.60
  -1  13   1    5.80    0.70
   0  13   1   64.19    1.70
   0  13   1   67.29    1.80
   0  13  -1   65.09    1.90
   0  13  -1   63.49    1.70
  -1  13  -1  259.17    5.70
   1  13   1  259.27    5.50
  -1  13  -1  254.17    5.40
   1  13   1  251.27    5.60
   2  13   1   51.49    1.60
  -2  13  -1   54.49    1.80
  -2  13  -1   53.99    1.20
   2  13   1   54.39    1.50
   3 -13   1   86.19    2.50
  -3  13  -1   85.89    2.50
   3  13   1   88.49    2.00
   3  13   1   84.19    2.40
   4 -13   1   92.69    2.70
  -4 -13  -1   87.19    2.10
   4  13   1   88.39    2.50
  -4  13  -1   86.49    2.70
   5 -13   1   61.99    2.30
   5  13   1   62.89    2.10
  -5  13  -1   64.39    2.30
   5  13   1   65.69    2.00
   6 -13   1    1.10    0.90
   6  13   1    0.80    0.80
  -6  13  -1   -0.40    0.80
   6  13   1    1.20    0.70
   7 -13   1    0.10    1.00
  -7  13  -1    0.50    1.10
   7  13   1   -0.50    0.90
   7  13   1   -1.20    0.70
   8 -13   1    5.70    1.30
  -8  13  -1    4.70    1.30
   8  13   1    7.00    1.20
   9 -13   1    6.80    1.50
   9  13   1    8.30    1.30
  10 -13   1    3.20    1.50
  10  13   1    3.60    1.20
  10  14  -1    2.80    1.30
 -10  14   1    0.60    1.70
  -9  14   1    0.60    1.40
   9  14  -1    0.80    1.10
   8  14  -1    2.10    1.10
  -8  14   1    2.90    1.30
  -7  14   1   27.10    1.90
   7  14  -1   25.70    1.60
   6  14  -1    0.40    0.80
  -6  14   1    0.90    1.10
  -5 -14   1   26.00    1.10
  -5  14   1   24.20    1.60
   5  14  -1   25.20    1.50
   4  14  -1    4.70    0.80
  -4  14   1    5.90    1.00
   4  14  -1    5.90    0.60
   4  14  -1    6.00    0.50
  -3  14   1   22.20    0.80
  -3  14   1   21.70    1.40
   3  14  -1   22.00    1.00
   3  14  -1   20.80    1.10
  -2  14   1    7.70    0.50
   2  14  -1    7.00    0.70
  -2  14   1    6.20    0.80
   2  14  -1    7.40    0.80
   1  14  -1   48.50    1.50
  -1  14   1   48.10    1.60
   1  14  -1   46.50    1.50
  -1  14   1   45.90    1.30
   0  14  -1    1.80    0.40
   0  14   1    1.00    0.50
   0  14  -1    0.90    0.60
   0  14   1    0.30    0.50
  -1  14  -1   16.70    0.70
   1  14   1   17.00    0.90
  -1  14  -1   17.80    1.10
   1  14   1   16.90    0.90
   2  14   1    5.40    0.70
   2  14   1    5.00    0.50
  -2  14  -1    3.60    0.70
  -2  14  -1    4.90    0.30
   3 -14   1  164.38    4.20
  -3  14  -1  167.38    4.10
   3  14   1  171.58    4.00
   3  14   1  169.08    3.70
   4 -14   1   -0.80    0.70
   4  14   1   -0.60    0.60
  -4  14  -1    0.60    0.70
   5 -14   1   93.49    3.00
   5  14   1  106.99    2.90
  -5  14  -1  100.69    3.10
   6 -14   1    2.30    1.00
   6  14   1    2.60    0.80
  -6  14  -1    1.60    1.00
   6  14   1    2.90    1.00
   7 -14   1   19.70    1.70
   7  14   1   20.30    1.70
   7  14   1   21.80    1.50
  -7  14  -1   21.00    1.70
   8 -14   1   -0.70    1.00
  -8  14  -1   -0.50    1.20
   8  14   1    0.20    0.90
   9 -14   1    0.80    1.20
   9  14   1    1.30    1.10
  -9  14  -1   -0.50    1.70
  10 -14   1    6.60    1.70
  10  14   1   10.10    1.50
 -10  15   1    1.00    1.50
  10  15  -1    1.10    1.20
   9  15  -1    1.50    1.20
  -9  15   1    0.90    1.40
  -8  15   1   -0.30    1.10
   8  15  -1   -0.20    1.00
  -7  15   1    2.40    1.10
   7  15  -1   -0.60    1.00
   6  15  -1    6.60    1.00
  -6  15   1    8.80    1.30
  -5 -15   1  264.47    5.80
  -5  15   1  256.87    6.30
   5  15  -1  265.57    6.20
  -4  15   1   36.70    1.70
   4  15  -1   35.30    1.50
   4  15  -1   35.30    1.30
   4  15  -1   35.90    1.20
   3  15  -1    3.80    0.60
   3  15  -1    3.80    0.70
  -3  15   1    4.70    0.40
  -3  15   1    5.80    0.90
   2  15  -1    7.90    0.70
   2  15  -1    8.30    0.70
  -2  15   1    9.10    0.60
  -2  15   1   10.30    0.90
   1  15  -1   91.99    2.30
  -1  15   1   91.59    2.20
  -1  15   1   91.39    2.50
   1  15  -1   91.39    2.40
   0  15  -1   50.29    1.40
   0  15   1   52.99    1.50
   0  15  -1   51.09    1.70
   0  15   1   51.79    1.70
  -1  15  -1  314.37    7.10
   1  15   1  324.17    6.90
  -1  15  -1  321.47    6.70
   1  15   1  317.47    7.00
  -2  15  -1   44.40    1.10
  -2  15  -1   44.10    1.70
   2  15   1   43.20    1.30
   2  15   1   42.80    1.50
   3  15   1   97.09    2.30
  -3  15  -1   96.59    2.70
   3  15   1   91.79    2.60
   4 -15   1   37.50    1.70
   4  15   1   36.10    1.60
  -4  15  -1   33.20    1.60
   5 -15   1  150.08    4.10
  -5  15  -1  152.18    4.10
   5  15   1  150.28    4.00
   6 -15   1    8.30    1.20
   6  15   1    7.80    1.10
  -6  15  -1    9.20    1.30
   6  15   1    7.50    0.90
   7 -15   1   -1.70    1.00
   7  15   1    1.60    0.90
  -7  15  -1    1.70    1.20
   8 -15   1    5.80    1.30
   8  15   1    2.20    1.00
  -8  15  -1    3.40    1.20
   9 -15   1    1.60    1.40
   9  15   1   -0.80    0.90
  -9  15  -1   -2.10    1.20
  10  15   1   13.00    1.60
  10  16  -1    2.40    1.30
 -10  16   1    0.70    1.30
  -9  16   1    0.70    1.40
   9  16  -1    4.40    1.30
  -8  16   1    1.50    1.30
   8  16  -1    0.60    1.10
   7  16  -1   -1.30    0.80
  -7  16   1    0.10    1.20
   6  16  -1   -0.50    0.80
  -6  16   1    0.70    1.00
  -5 -16   1   17.90    1.40
   5  16  -1   17.60    1.30
  -5  16   1   20.30    1.50
   4  16  -1    3.60    0.80
   4  16  -1    3.40    0.60
  -4  16   1    3.30    0.90
   3  16  -1   35.90    1.30
  -3  16   1   34.30    1.00
  -3  16   1   35.00    1.60
   3  16  -1   35.60    1.40
   2  16  -1   75.09    2.10
  -2  16   1   77.59    2.30
  -2  16   1   77.29    1.90
   2  16  -1   76.99    2.10
  -1  16   1  160.58    3.60
   1  16  -1  150.48    3.70
  -1  16   1  155.28    3.80
   1  16  -1  163.98    3.80
   0  16  -1   12.30    1.00
   0  16  -1   11.80    0.70
   0  16   1   11.60    0.80
   0  16   1    9.90    0.80
  -1  16  -1  111.29    2.60
   1  16   1  113.69    2.80
   1  16   1  112.19    2.80
  -1  16  -1  109.39    2.90
   2  16   1  133.99    3.10
  -2  16  -1  135.09    2.90
   2  16   1  132.99    3.30
  -2  16  -1  133.19    3.50
   3  16   1   43.60    1.30
   3  16   1   44.70    1.60
  -3  16  -1   47.90    1.90
   4 -16   1   13.70    1.20
   4  16   1   14.10    1.10
  -4  16  -1   13.00    1.20
   5 -16   1    0.50    0.80
   5  16   1    0.50    0.80
  -5  16  -1    1.20    0.90
   6 -16   1    9.60    1.30
  -6  16  -1   11.00    1.40
   6  16   1   11.60    1.20
   6  16   1    9.70    1.00
   7 -16   1    4.10    1.30
   7  16   1    5.60    1.20
  -7  16  -1    1.30    1.20
   8 -16   1    0.70    1.10
   8  16   1    0.50    1.00
  -8  16  -1    0.00    1.20
   9 -16   1    0.60    1.40
  -9  16  -1   -0.60    1.30
   9  16   1    2.40    1.10
  10  16   1   19.20    1.80
  10  17  -1    2.50    1.40
 -10  17   1    1.10    1.50
  -9  17   1    0.10    1.40
   9  17  -1    0.10    1.10
   8  17  -1    5.90    1.30
  -8  17   1    3.40    1.50
  -7  17   1    1.20    1.10
   7  17  -1    1.50    0.90
   6  17  -1   21.40    1.50
  -6  17   1   17.60    1.50
  -5  17   1   55.99    2.30
   5  17  -1   54.29    2.00
   4  17  -1    2.60    0.70
  -4  17   1    3.60    1.00
   4  17  -1    4.60    0.70
   3  17  -1   22.20    1.10
  -3  17   1   21.30    1.40
   3  17  -1   21.00    1.20
  -3  17   1   22.30    0.80
   2  17  -1    1.20    0.60
   2  17  -1    1.50    0.60
  -2  17   1    1.90    0.40
  -2  17   1    0.60    0.70
   1  17  -1  166.18    4.10
   1  17  -1  173.28    4.00
  -1  17   1  178.68    3.90
  -1  17   1  175.38    4.20
   0  17   1   68.19    1.90
   0  17   1   70.99    2.10
   0  17  -1   71.09    1.90
   0  17  -1   68.99    2.10
   1  17   1   48.50    1.60
   1  17   1   46.10    1.60
  -1  17  -1   45.90    1.30
  -1  17  -1   46.70    1.70
   2  17   1   20.00    1.10
  -2  17  -1   21.50    0.70
  -2  17  -1   20.00    1.40
   2  17   1   21.00    1.00
  -3  17  -1    0.80    0.80
   3  17   1    0.50    0.40
   3  17   1    2.40    0.70
  -4  17  -1    0.40    0.90
   4  17   1    0.90    0.70
   5 -17   1   28.30    1.80
  -5  17  -1   26.90    1.70
   5  17   1   26.70    1.50
   6 -17   1   21.00    1.60
   6  17   1   22.20    1.50
  -6  17  -1   20.10    1.60
   7 -17   1    5.00    1.20
  -7  17  -1    5.40    1.30
   7  17   1    5.40    1.10
   8 -17   1    8.00    1.60
   8  17   1    6.80    1.20
  -8  17  -1    6.30    1.50
  -9  17  -1    4.70    1.50
   9  17   1    5.70    1.30
  10  17   1    1.20    1.10
 -10  18   1   12.20    1.90
  10  18  -1   13.80    1.80
   9  18  -1    5.20    1.40
  -9  18   1    1.80    1.50
  -8  18   1   44.30    2.70
   8  18  -1   43.30    2.20
   7  18  -1    0.40    0.90
  -7  18   1    2.30    1.40
  -6  18   1   22.20    1.80
   6  18  -1   20.90    1.50
   5  18  -1   49.99    2.10
  -5  18   1   48.60    2.30
   4  18  -1   34.10    1.60
  -4  18   1   37.80    1.90
   4  18  -1   37.40    1.40
  -3  18   1   10.20    0.70
   3  18  -1   12.00    1.00
   3  18  -1   10.90    0.80
  -3  18   1   11.60    1.10
  -2  18   1    2.00    0.70
   2  18  -1    2.40    0.60
   2  18  -1    2.50    0.60
  -2  18   1    2.50    0.50
   1  18  -1    2.80    0.70
  -1  18   1    2.90    0.80
   1  18  -1    2.60    0.60
  -1  18   1    2.90    0.50
   0  18  -1    3.70    0.50
   0  18  -1    2.70    0.80
   0  18   1    5.40    0.70
   0  18   1    4.10    0.60
  -1  18  -1   34.80    1.10
   1  18   1   38.70    1.40
  -1  18  -1   36.70    1.60
   1  18   1   36.00    1.40
  -2  18  -1   -0.40    0.70
   2  18   1    0.40    0.60
   2  18   1    0.20    0.50
  -2  18  -1    0.00    0.30
   3  18   1   64.09    1.70
  -3  18  -1   62.49    2.30
   3  18   1   66.19    2.10
  -4  18  -1   51.99    2.20
   4  18   1   49.70    1.90
  -5  18  -1  116.49    3.50
   5  18   1  117.39    3.40
   6  18   1   22.30    1.50
  -6  18  -1   23.20    1.70
  -7  18  -1   12.60    1.40
   7  18   1   15.10    1.40
   8  18   1   32.10    2.10
  -8  18  -1   22.70    2.00
   9  18   1    3.40    1.20
  -9  18  -1    2.00    1.40
  10  18   1    2.10    1.30
 -10  19   1    3.90    1.70
  10  19  -1    3.80    1.60
  -9  19   1    7.90    1.70
   9  19  -1   10.10    1.40
   8  19  -1    0.70    1.00
  -8  19   1   -0.40    1.20
  -7  19   1    1.90    1.20
   7  19  -1    3.20    1.00
   6  19  -1    4.80    1.00
  -6  19   1    3.60    1.20
   5  19  -1    0.50    0.80
  -5  19   1    0.80    1.10
  -4  19   1   12.40    1.30
   4  19  -1   12.90    1.10
   4  19  -1   12.10    0.90
  -3  19   1   14.40    0.70
  -3  19   1   14.50    1.20
   3  19  -1   13.40    1.00
   3  19  -1   14.00    1.00
  -2  19   1    9.30    1.00
  -2  19   1    9.50    0.70
   2  19  -1    8.00    0.80
   2  19  -1    9.90    0.90
  -1  19   1   35.10    1.20
   1  19  -1   35.40    1.30
  -1  19   1   36.60    1.60
   1  19  -1   31.70    1.40
   0  19   1    1.70    0.60
   0  19  -1    1.60    0.50
   0  19  -1    0.70    0.60
   0  19   1    2.20    0.70
  -1  19  -1   51.49    1.40
  -1  19  -1   44.80    1.80
   1  19   1   48.00    1.60
   1  19   1   46.70    1.60
  -2  19  -1    6.50    0.90
   2  19   1    8.10    0.70
  -2  19  -1    9.10    0.60
   2  19   1    8.40    0.90
   3  19   1   31.80    1.40
   3  19   1   29.50    1.10
  -3  19  -1   31.40    1.70
   4  19   1   17.70    1.30
  -4  19  -1   15.10    1.40
  -5  19  -1   -0.20    0.90
   5  19   1    0.90    1.00
   6  19   1    0.60    0.90
  -6  19  -1   -0.50    1.10
  -7  19  -1    4.20    1.20
   7  19   1    8.00    1.30
   8  19   1    1.00    1.00
  -8  19  -1    1.00    1.20
  -9  19  -1    0.40    1.30
   9  19   1    1.00    1.20
  10  19   1    4.70    1.40
 -10  20   1   -0.80    1.60
  -9  20   1    2.80    1.40
   9  20  -1    3.50    1.30
   8  20  -1    2.20    1.10
  -8  20   1    4.70    1.40
   7  20  -1   -1.70    0.90
  -7  20   1   -1.70    1.20
   6  20  -1   -0.70    0.90
  -6  20   1    0.60    1.20
   5  20  -1   14.10    1.30
  -5  20   1   15.30    1.40
  -4  20   1   46.50    2.00
   4  20  -1   45.50    1.60
   4  20  -1   47.60    1.90
   3  20  -1   17.40    1.10
  -3  20   1   18.50    1.40
   3  20  -1   17.60    1.20
   2  20  -1    9.10    0.80
  -2  20   1   12.00    0.70
   2  20  -1   10.20    0.90
  -2  20   1   10.80    1.10
  -1  20   1    0.40    0.50
   1  20  -1    1.30    0.70
  -1  20   1    2.10    0.80
   1  20  -1    0.70    0.50
   0  20   1    0.40    0.60
   0  20  -1    0.80    0.50
   0  20   1    0.80    0.60
   0  20  -1    1.60    0.70
  -1  20  -1    2.10    0.70
   1  20   1    1.40    0.60
  -1  20  -1    2.10    0.50
   1  20   1    1.00    0.60
  -2  20  -1    1.20    0.80
   2  20   1    1.40    0.60
   2  20   1    0.80    0.60
  -3  20  -1    0.60    0.90
   3  20   1    1.80    0.70
  -4  20  -1    1.90    1.00
   4  20   1    1.50    0.80
   5  20   1   17.90    1.40
  -5  20  -1   15.60    1.40
   6  20   1    6.30    1.10
  -6  20  -1    4.90    1.30
  -7  20  -1    1.60    1.20
   7  20   1    0.50    1.10
   8  20   1    0.80    1.20
  -8  20  -1    0.40    1.30
   9  20   1    3.50    1.20
  -9  20  -1    2.30    1.50
   9  21  -1   -0.70    1.10
  -9  21   1    3.10    1.40
   8  21  -1    3.50    1.10
  -8  21   1    2.60    1.50
   7  21  -1    4.20    1.10
  -7  21   1    4.10    1.40
   6  21  -1   51.09    2.30
  -6  21   1   48.60    2.40
  -5  21   1  120.89    3.70
   5  21  -1  124.89    3.60
  -4  21   1    1.60    0.90
   4  21  -1    2.00    0.80
   4  21  -1    1.10    0.70
  -3  21   1   15.20    1.30
   3  21  -1   13.30    1.00
   3  21  -1   13.40    1.10
   2  21  -1   13.40    1.00
  -2  21   1   14.00    0.90
   2  21  -1   12.20    1.00
  -2  21   1   12.50    1.10
  -1  21   1   63.59    2.20
   1  21  -1   61.99    2.10
   1  21  -1   59.59    1.90
  -1  21   1   63.59    1.80
   0  21  -1   -0.60    0.70
   0  21   1   -0.20    0.70
   0  21   1    0.40    0.60
   0  21  -1    0.40    0.50
  -1  21  -1    1.80    0.90
   1  21   1    2.50    0.70
  -1  21  -1    3.60    0.50
   1  21   1    3.20    0.70
   2  21   1   15.40    1.10
  -2  21  -1   14.10    1.30
   2  21   1   16.40    1.10
   3  21   1   -0.90    0.70
  -3  21  -1    0.40    0.90
   4  21   1   27.70    1.50
  -4  21  -1   31.90    1.90
   5  21   1    4.70    1.00
  -5  21  -1    3.90    1.10
   6  21   1    2.10    1.00
  -6  21  -1    2.80    1.10
   7  21   1    1.20    1.20
  -7  21  -1    1.40    1.30
   8  21   1   20.30    1.80
  -8  21  -1   18.90    2.00
  -9  21  -1    3.00    1.50
   9  21   1    0.00    1.20
  -9  22   1    8.90    1.70
   9  22  -1    6.80    1.50
   8  22  -1    3.20    1.20
  -8  22   1    2.90    1.60
  -7  22   1    1.20    1.20
   7  22  -1    0.10    1.10
   6  22  -1    3.80    1.10
  -6  22   1    4.60    1.40
   5  22  -1    7.60    1.20
  -5  22   1    9.00    1.40
  -4  22   1    1.10    0.90
   4  22  -1    1.30    0.80
   3  22  -1   -0.60    0.60
   3  22  -1    0.90    0.80
  -3  22   1    0.10    0.80
   2  22  -1    7.50    0.90
  -2  22   1    7.30    0.70
  -2  22   1    6.50    1.00
   2  22  -1    7.80    0.90
  -1  22   1   -0.30    0.70
   1  22  -1    1.20    0.70
   1  22  -1    0.50    0.60
  -1  22   1   -0.10    0.50
   0  22  -1   13.70    1.20
   0  22  -1   11.60    0.80
   0  22   1   14.70    1.10
   0  22   1   13.10    0.90
   1  22   1    2.20    0.70
  -1  22  -1    3.00    0.50
  -1  22  -1    1.70    0.80
   1  22   1    2.80    0.70
  -2  22  -1    0.50    0.80
   2  22   1   -0.40    0.70
   2  22   1    1.00    0.60
   3  22   1    5.00    0.90
  -3  22  -1    5.80    1.00
  -4  22  -1    2.20    1.10
   4  22   1    0.30    0.80
  -5  22  -1    3.50    1.10
   5  22   1    4.70    1.10
  -6  22  -1    3.50    1.20
   6  22   1    3.60    1.20
  -7  22  -1    2.60    1.40
   7  22   1    0.10    1.20
  -8  22  -1    0.60    1.40
   8  22   1    0.30    1.20
   9  22   1   12.20    1.70
  -9  22  -1   13.00    1.80
  -9  23   1    2.00    1.50
   9  23  -1    1.70    1.20
   8  23  -1    0.70    1.20
  -8  23   1   -0.10    1.50
   7  23  -1    3.40    1.20
  -7  23   1    3.60    1.50
   6  23  -1   14.50    1.40
  -6  23   1   13.80    1.60
  -5  23   1    5.40    1.20
   5  23  -1    7.70    1.20
  -4  23   1    5.50    1.20
   4  23  -1    5.50    1.00
   3  23  -1    2.80    0.70
  -3  23   1    4.10    1.00
   3  23  -1    4.50    0.90
   2  23  -1   40.80    1.60
  -2  23   1   41.70    1.80
  -2  23   1   41.80    1.40
   2  23  -1   41.80    1.70
  -1  23   1    0.40    0.60
   1  23  -1    0.00    0.60
   1  23  -1    0.10    0.70
  -1  23   1    1.20    0.90
   0  23   1    1.40    0.70
   0  23  -1    1.00    0.80
   0  23   1   -0.20    0.70
   0  23  -1   -0.40    0.50
   1  23   1    0.20    0.70
   1  23   1    1.10    0.70
  -1  23  -1   -0.60    0.80
  -1  23  -1    0.20    0.50
  -2  23  -1   52.29    2.10
   2  23   1   54.39    1.90
   2  23   1   46.50    1.70
   3  23   1    2.90    0.90
  -3  23  -1    4.40    1.00
  -4  23  -1   19.70    1.60
   4  23   1   17.50    1.40
   5  23   1   35.60    1.90
  -5  23  -1   32.80    2.10
  -6  23  -1   10.90    1.50
   6  23   1    8.10    1.30
   7  23   1   13.10    1.60
  -7  23  -1   13.80    1.80
   8  23   1   34.30    2.30
  -8  23  -1   34.90    2.40
   9  23   1    1.00    1.20
  -9  23  -1    0.00    1.50
  -9  24   1    0.70    1.50
   9  24  -1    0.80    1.40
  -8  24   1   -0.80    1.50
   8  24  -1   -1.00    1.20
  -7  24   1    0.20    1.40
   7  24  -1    0.30    1.00
  -6  24   1    0.10    1.30
   6  24  -1    0.20    0.90
  -5  24   1   23.60    1.90
   5  24  -1   26.20    1.80
  -4  24   1   21.40    1.60
   4  24  -1   25.40    1.50
  -3  24   1    5.60    1.20
   3  24  -1    6.30    0.90
   3  24  -1    4.20    0.90
   2  24  -1   77.89    2.50
   2  24  -1   83.39    2.50
  -2  24   1   81.39    2.80
   1  24  -1  534.75   11.50
  -1  24   1  508.35   11.50
  -1  24   1  539.65   11.30
   1  24  -1  525.95   11.40
   0  24  -1   40.80    1.50
   0  24   1   40.50    1.60
   0  24   1   39.80    1.70
   0  24  -1   39.10    1.90
  -1  24  -1  338.07    7.70
  -1  24  -1  321.07    7.40
   1  24   1  332.17    7.40
   1  24   1  328.17    7.40
   2  24   1   23.50    1.30
   2  24   1   25.60    1.50
  -2  24  -1   25.20    1.70
  -3  24  -1   19.10    1.50
   3  24   1   20.80    1.40
   4  24   1    1.70    0.90
  -4  24  -1   -0.80    1.10
   5  24   1    0.30    1.10
  -5  24  -1    1.50    1.10
   6  24   1    0.70    1.00
  -6  24  -1   -1.30    1.10
  -7  24  -1    0.10    1.20
   7  24   1    2.80    1.10
  -8  24  -1    0.10    1.40
   8  24   1    1.00    1.30
   9  24   1   11.30    1.90
  -9  24  -1    5.80    1.70
   8  25  -1    9.00    1.60
  -8  25   1    6.40    1.60
  -7  25   1   11.80    1.70
   7  25  -1   16.10    1.60
   6  25  -1    0.90    1.00
  -6  25   1    0.90    1.20
   5  25  -1   13.90    1.40
  -5  25   1   15.20    1.60
   4  25  -1    5.40    1.10
  -4  25   1    3.00    1.10
   3  25  -1   19.80    1.30
   3  25  -1   18.70    1.40
  -3  25   1   19.20    1.50
   2  25  -1   40.90    1.70
  -2  25   1   41.30    2.00
   2  25  -1   45.30    1.80
  -1  25   1  125.19    3.20
   1  25  -1  128.29    3.50
   1  25  -1  125.29    3.30
  -1  25   1  124.69    3.60
   0  25   1   59.29    2.00
   0  25  -1   62.89    2.30
   0  25  -1   58.19    1.90
   0  25   1   60.39    2.20
   1  25   1  168.28    4.20
   1  25   1  165.78    4.20
  -1  25  -1  165.08    4.40
   2  25   1    3.80    0.80
  -2  25  -1    3.50    1.10
   2  25   1    2.20    0.80
   3  25   1   -0.20    0.80
  -3  25  -1    0.30    1.00
   4  25   1    1.70    1.00
  -4  25  -1    1.10    1.10
   5  25   1   15.70    1.50
  -5  25  -1   15.80    1.60
  -6  25  -1    3.80    1.40
   6  25   1    4.30    1.20
  -7  25  -1    4.40    1.40
   7  25   1    6.60    1.30
   8  25   1    0.20    1.30
  -8  25  -1    0.40    1.50
  -9  25  -1    0.60    1.60
   8  26  -1   14.90    1.60
  -8  26   1   15.20    1.90
  -7  26   1    4.20    1.40
   7  26  -1    4.00    1.10
   6  26  -1   27.70    2.00
  -6  26   1   23.70    2.00
  -5  26   1    0.90    1.30
   5  26  -1    3.10    1.00
  -4  26   1   62.59    2.60
   4  26  -1   65.49    2.40
   3  26  -1    2.50    0.80
   3  26  -1    2.90    0.90
  -3  26   1    3.80    1.10
  -2  26   1   26.20    1.70
   2  26  -1   28.20    1.40
   2  26  -1   25.20    1.50
   1  26  -1    0.20    0.70
  -1  26   1   -0.30    0.60
  -1  26   1    1.10    1.00
   1  26  -1   -0.60    0.80
   0  26  -1    3.40    0.70
   0  26   1    1.60    0.70
   0  26   1    1.20    0.90
   0  26  -1    1.20    1.00
  -1  26  -1    2.60    1.10
   1  26   1    1.50    0.80
   1  26   1    1.40    0.80
  -2  26  -1    2.40    1.00
   2  26   1    3.70    1.00
  -3  26  -1   10.20    1.40
   3  26   1    8.80    1.20
  -4  26  -1   46.90    2.50
   4  26   1   53.59    2.30
   5  26   1    3.70    1.10
  -5  26  -1    0.70    1.20
  -6  26  -1   21.00    1.90
   6  26   1   15.10    1.50
   7  26   1    0.20    1.00
  -7  26  -1   -0.80    1.40
   8  26   1   12.90    1.60
  -8  26  -1    8.90    1.70
  -8  27   1    1.00    1.50
   8  27  -1   -0.30    1.20
   7  27  -1    4.40    1.30
  -7  27   1    2.70    1.50
  -6  27   1   -0.50    1.40
   6  27  -1    1.40    1.10
   5  27  -1    3.40    1.20
  -5  27   1    0.30    1.20
   4  27  -1    4.80    1.10
  -4  27   1    6.00    1.40
  -3  27   1    9.30    1.40
   3  27  -1    5.90    1.00
   3  27  -1    7.60    1.10
   2  27  -1   96.79    2.90
   2  27  -1   98.59    2.90
  -2  27   1   97.49    3.10
   1  27  -1   78.89    2.40
  -1  27   1   82.39    2.70
  -1  27   1   81.59    2.40
   1  27  -1   78.49    2.60
   0  27   1    9.60    1.00
   0  27  -1    9.70    0.90
   0  27  -1    7.10    1.20
   0  27   1    7.80    1.10
  -1  27  -1    0.30    0.90
   1  27   1    0.70    0.80
   1  27   1    1.30    0.90
  -2  27  -1   70.79    2.80
   2  27   1   73.69    2.40
   3  27   1   16.70    1.50
  -3  27  -1   20.10    1.70
  -4  27  -1   10.10    1.40
   4  27   1   17.40    1.50
  -5  27  -1    7.40    1.50
   5  27   1    7.70    1.40
   6  27   1    1.70    1.20
  -6  27  -1   -0.80    1.40
  -7  27  -1   10.70    1.80
   7  27   1   12.30    1.50
  -8  27  -1    4.20    1.70
   8  27   1    1.70    1.20
  -8  28   1   -0.20    1.50
   8  28  -1   -0.10    1.40
  -7  28   1    2.50    1.60
   7  28  -1    5.50    1.40
  -6  28   1    1.70    1.50
   6  28  -1   -0.50    1.00
  -5  28   1    2.50    1.30
   5  28  -1   -0.60    0.90
   4  28  -1    3.40    1.00
  -4  28   1    3.00    1.20
  -3  28   1    0.90    1.20
   3  28  -1   -2.00    0.90
  -2  28   1    8.60    1.30
   2  28  -1    9.40    1.10
   2  28  -1    6.10    1.00
   1  28  -1   10.90    1.00
   1  28  -1    7.90    1.10
  -1  28   1   10.20    1.30
   0  28   1    0.00    0.70
   0  28   1    1.20    0.90
   0  28  -1    0.80    0.70
   0  28  -1    1.30    0.90
  -1  28  -1    0.90    1.10
   1  28   1    0.20    0.80
   1  28   1    0.30    0.70
   2  28   1   -0.80    0.90
  -2  28  -1    1.80    1.10
   3  28   1   12.90    1.20
  -3  28  -1   11.40    1.50
   4  28   1    0.60    1.10
  -4  28  -1    0.40    1.10
   5  28   1    9.60    1.30
  -5  28  -1    2.20    1.40
   6  28   1   11.00    1.40
  -6  28  -1   10.90    1.70
  -7  28  -1    2.40    1.60
   7  28   1    2.60    1.20
  -8  28  -1    1.00    1.60
   8  28   1   -1.80    1.10
  -7  29   1   -0.80    1.60
   7  29  -1    2.00    1.20
  -6  29   1    9.20    1.60
   6  29  -1   12.20    1.60
  -5  29   1   20.80    2.00
   5  29  -1   18.40    1.60
  -4  29   1    4.10    1.40
   4  29  -1    1.90    1.10
   3  29  -1   29.10    1.70
  -3  29   1   26.40    1.90
   2  29  -1    2.00    0.90
   2  29  -1    0.10    0.80
  -2  29   1    3.70    1.20
   1  29  -1    5.00    1.10
   1  29  -1    6.80    0.90
  -1  29   1    9.10    1.30
   0  29   1   11.50    1.30
   0  29  -1   13.20    1.40
   0  29   1   14.30    1.20
   1  29   1   35.60    1.80
   1  29   1   35.10    1.60
  -1  29  -1   35.30    2.00
  -2  29  -1    1.50    1.10
   2  29   1    0.40    0.90
   3  29   1    1.50    0.90
  -3  29  -1    0.40    1.10
   4  29   1    0.30    1.10
  -4  29  -1    1.20    1.10
  -5  29  -1   -0.50    1.30
   5  29   1   -0.60    1.00
   6  29   1    3.80    1.20
  -6  29  -1    4.60    1.40
  -7  29  -1    3.20    1.50
   7  29   1    3.50    1.40
  -7  30   1   22.80    2.30
   7  30  -1   26.10    2.00
  -6  30   1    0.70    1.30
   6  30  -1    0.90    1.10
  -5  30   1    3.20    1.40
   5  30  -1    3.10    1.10
  -4  30   1   -0.30    1.20
   4  30  -1    1.40    1.00
   3  30  -1    0.70    0.90
  -3  30   1    0.50    1.20
   2  30  -1   18.00    1.40
   2  30  -1   18.80    1.40
  -2  30   1   13.60    1.50
  -1  30   1    0.40    1.10
   1  30  -1   -0.40    0.70
   1  30  -1   -0.70    0.90
   0  30   1    0.10    0.80
   0  30  -1    1.80    1.10
   0  30   1    1.90    1.00
   1  30   1   34.60    1.60
   1  30   1   35.30    1.80
  -1  30  -1   32.20    2.10
  -2  30  -1   25.20    1.90
   2  30   1   26.00    1.70
  -3  30  -1    8.70    1.40
   3  30   1    6.20    1.20
  -4  30  -1   -1.40    1.10
   4  30   1    0.70    1.10
  -5  30  -1    0.80    1.20
   5  30   1    1.80    1.10
  -6  30  -1    2.40    1.40
   6  30   1    1.80    1.30
   7  30   1   16.60    1.80
  -7  30  -1   13.50    1.80
   7  31  -1    3.00    1.40
  -7  31   1   -0.80    1.40
   6  31  -1   15.80    1.70
  -6  31   1   16.10    2.00
  -5  31   1    0.60    1.30
   5  31  -1    1.50    1.20
  -4  31   1    0.50    1.30
   4  31  -1    0.60    1.00
  -3  31   1    3.60    1.20
   3  31  -1    5.10    1.00
   2  31  -1   11.10    1.20
   2  31  -1   11.00    1.30
  -2  31   1   10.20    1.50
   1  31  -1    0.20    0.80
  -1  31   1    1.60    1.00
   1  31  -1    1.60    1.00
   0  31   1    1.70    0.80
   0  31  -1    1.80    1.10
   0  31   1    1.80    0.90
   1  31   1    0.10    0.90
   1  31   1    0.80    0.90
  -1  31  -1    1.30    1.00
   2  31   1   17.60    1.40
  -2  31  -1   22.80    1.80
   3  31   1   11.70    1.30
  -3  31  -1   12.10    1.60
   4  31   1    2.40    1.20
  -4  31  -1    0.60    1.30
  -5  31  -1   -1.00    1.20
   5  31   1    0.30    1.10
  -6  31  -1    5.30    1.50
   6  31   1    6.70    1.30
   7  31   1    9.80    1.50
  -7  31  -1   11.50    2.00
   7  32  -1   -0.30    1.40
   6  32  -1    3.40    1.20
  -6  32   1    3.00    1.70
   5  32  -1   -0.70    1.00
  -5  32   1    0.20    1.40
  -4  32   1    1.50    1.40
   4  32  -1    1.30    1.10
  -3  32   1   -0.80    1.10
   3  32  -1   -1.60    0.80
  -2  32   1    3.60    1.30
   2  32  -1    3.10    1.10
   2  32  -1    3.00    1.00
   1  32  -1   -0.80    1.00
  -1  32   1   -0.30    1.00
   1  32  -1   -0.10    1.20
   0  32  -1    0.00    1.00
   0  32   1    1.10    1.00
  -1  32  -1    3.00    1.20
   1  32   1    2.60    1.00
  -2  32  -1    0.90    1.10
   2  32   1    0.60    1.00
  -3  32  -1    2.20    1.40
   3  32   1    0.70    1.00
   4  32   1    2.30    1.10
  -4  32  -1    0.40    1.30
   5  32   1    0.40    1.10
  -5  32  -1   -0.10    1.30
  -6  32  -1    4.30    1.70
   6  32   1    7.30    1.40
   6  33  -1    5.10    1.50
  -6  33   1    4.60    1.60
   5  33  -1    8.40    1.40
  -5  33   1    8.40    1.80
  -4  33   1    8.30    1.50
   4  33  -1   12.30    1.50
  -3  33   1    3.40    1.50
   3  33  -1    4.10    1.00
  -2  33   1    2.00    1.30
   2  33  -1    1.90    0.90
  -1  33   1   12.30    1.50
   1  33  -1   11.20    1.40
   0  33   1    2.20    1.10
   0  33  -1    3.40    1.20
  -1  33  -1    8.60    1.30
   1  33   1    7.90    1.20
  -2  33  -1   -1.50    1.20
   2  33   1    0.80    1.00
   3  33   1    0.60    1.10
  -3  33  -1    4.00    1.40
  -4  33  -1    1.30    1.40
   4  33   1    0.40    1.00
   5  33   1    0.60    1.10
  -5  33  -1    2.20    1.50
   6  33   1    4.50    1.30
  -6  33  -1    4.80    1.70
  -6  34   1    4.90    1.60
   6  34  -1   -0.20    1.20
  -5  34   1    1.70    1.40
   5  34  -1    3.10    1.30
  -4  34   1    0.90    1.30
   4  34  -1    1.60    1.20
   3  34  -1    0.90    0.90
  -3  34   1    1.40    1.40
   2  34  -1    2.30    1.00
  -2  34   1    0.70    1.10
   1  34  -1    0.80    1.10
  -1  34   1    1.40    1.20
   0  34   1    0.60    1.10
   0  34  -1   -0.40    1.10
  -1  34  -1   15.50    1.70
   1  34   1   13.80    1.30
   2  34   1    0.90    0.90
  -2  34  -1   -0.70    1.20
  -3  34  -1    9.40    1.50
   3  34   1   11.80    1.40
  -4  34  -1    2.70    1.30
   4  34   1    4.60    1.30
   5  34   1    2.50    1.20
  -5  34  -1    0.30    1.50
  -6  34  -1    3.00    1.60
   6  34   1    3.90    1.40
   6  35  -1    7.50    1.50
   5  35  -1    1.30    1.30
  -5  35   1    1.10    1.40
  -4  35   1    0.30    1.40
   4  35  -1    1.40    1.20
  -3  35   1    1.90    1.30
   3  35  -1    1.60    1.00
  -2  35   1   14.20    1.70
   2  35  -1   18.40    1.50
  -1  35   1    4.80    1.40
   1  35  -1    8.90    1.40
   0  35   1    1.60    1.20
   0  35  -1    1.80    1.10
  -1  35  -1   13.70    1.60
   2  35   1   23.30    1.70
  -2  35  -1   23.80    1.90
  -3  35  -1   36.20    2.40
   3  35   1   42.40    2.30
   4  35   1   11.00    1.60
  -4  35  -1    7.60    1.60
   5  35   1    1.90    1.20
  -5  35  -1    0.00    1.50
  -5  36   1    3.10    1.60
   5  36  -1    4.30    1.40
  -4  36   1    4.80    1.60
   4  36  -1    8.60    1.50
   3  36  -1    4.00    1.20
  -3  36   1    3.70    1.40
  -2  36   1    2.20    1.40
  -1  36   1    0.90    1.20
   1  36  -1    1.00    1.20
   0  36   1    6.30    1.90
   0  36  -1    6.30    1.40
  -1  36  -1   -0.50    1.20
  -2  36  -1    3.30    1.30
   2  36   1    4.90    1.20
  -3  36  -1    6.80    1.60
   3  36   1    5.50    1.20
  -4  36  -1    8.40    1.70
   4  36   1    9.10    1.40
   5  36   1   -0.20    1.10
  -5  36  -1    2.00    1.50
  -5  37   1    4.70    2.00
   5  37  -1    8.60    1.50
   4  37  -1    5.90    1.40
  -4  37   1    3.80    1.60
   3  37  -1   14.50    1.60
  -3  37   1   13.20    1.80
  -2  37   1    2.50    1.40
  -1  37   1   21.60    1.90
   0  37  -1    0.30    1.30
  -1  37  -1   13.60    1.70
  -2  37  -1    0.80    1.40
   2  37   1    2.00    1.10
  -3  37  -1    2.80    1.50
   3  37   1    0.80    1.20
  -4  37  -1    8.50    1.80
   4  37   1    5.60    1.40
   5  37   1    1.30    1.40
   5  38  -1    0.50    1.20
   4  38  -1    4.80    1.40
  -4  38   1    7.00    1.60
   3  38  -1    4.70    1.30
  -3  38   1    4.70    1.60
  -2  38   1    4.10    1.50
  -1  38   1    2.00    1.30
   0  38  -1    0.50    1.30
  -1  38  -1   -0.80    1.10
  -2  38  -1    0.90    1.40
   2  38   1    0.90    1.20
   3  38   1    0.80    1.10
  -3  38  -1    2.20    1.40
   4  38   1   18.90    1.90
   4  39  -1    2.80    1.30
  -4  39   1   -0.10    1.40
  -3  39   1    1.20    1.50
  -2  39   1    0.80    1.40
  -1  39   1    5.00    1.50
   0  39  -1    1.40    1.30
  -1  39  -1    2.80    1.40
  -2  39  -1    0.20    1.20
  -3  39  -1    0.30    1.30
   3  39   1    2.50    1.20
   4  39   1    1.00    1.20
   4  40  -1   19.20    1.80
  -3  40   1   12.10    1.90
  -2  40   1    2.40    1.30
  -1  40   1    8.00    1.70
   0  40  -1   38.90    2.50
  -1  40  -1    5.90    1.50
  -2  40  -1    1.90    1.50
  -3  40  -1    0.70    1.60
   3  40   1    2.80    1.30
   4  40   1    5.10    1.50
  -3  41   1    3.50    1.50
  -2  41   1    5.60    1.50
   0  41  -1    5.40    2.10
  -1  41  -1    0.80    1.40
  -2  41  -1    3.40    1.60
  -2  42   1    3.90    1.50
  -1  42  -1    3.00    1.60
  -1  43  -1    3.20    1.70
   9   0  -2   -0.70    1.00
   8   0  -2    4.10    0.80
  -8   0   2    2.00    1.00
   8   0  -2    3.20    1.00
  -7   0   2   -0.70    0.80
   7   0  -2    0.20    0.70
   7   0  -2   -1.10    0.70
  -6   0   2    7.40    0.90
   6   0  -2    8.60    0.90
   6   0  -2    8.70    0.90
   5   0  -2    0.00    0.60
  -5   0   2   -0.40    0.60
   5   0  -2    0.30    0.60
  -4   0   2  396.46    8.80
   4   0  -2  412.76    8.80
   4   0  -2  417.46    8.80
   3   0  -2   -1.00    0.40
  -3   0   2   -0.10    0.50
  -2   0   2    9.50    0.60
  -1   0   2    0.90    0.40
   0   0  -2 9999.00  224.78
   1   0   2   -0.80    0.20
  -1   0  -2   -0.90    0.30
   2   0   2   38.70    1.00
  -2   0  -2   37.20    1.00
   3   0   2    0.30    0.50
   3   0   2    1.20    0.40
  -3   0  -2    0.10    0.40
   4   0   2  143.49    3.30
   4   0   2  140.49    3.60
  -4   0  -2  144.49    3.30
  -5   0  -2    0.10    0.50
   5   0   2   -0.10    0.40
   5   0   2   -0.40    0.60
   6   0   2    1.60    0.80
  -6   0  -2    0.60    0.80
   6   0   2    0.40    0.60
   7   0   2   -0.20    0.90
   8   0   2   11.60    1.40
   9   0   2    0.90    1.10
  10   0   2    9.10    1.70
  11   0   2    1.00    1.40
   9  -1  -2    1.10    1.00
   8  -1  -2   13.30    1.40
   8  -1  -2   14.60    1.20
  -8  -1   2   12.50    1.30
   8   1  -2   14.20    1.30
   8   1  -2   16.30    1.30
  -8   1   2   13.30    1.30
   7  -1  -2    2.80    0.80
   7  -1  -2    2.20    0.90
  -7  -1   2    1.40    0.90
   7   1  -2    1.30    0.80
  -7   1   2    1.50    0.90
   7   1  -2    2.40    0.80
  -6  -1   2   38.90    1.70
   6  -1  -2   38.90    1.50
   6  -1  -2   39.60    1.70
   6   1  -2   38.80    1.60
   6   1  -2   40.80    1.60
  -6   1   2   37.90    1.70
   5  -1  -2    9.90    0.90
  -5  -1   2    9.90    0.90
   5  -1  -2   10.60    0.80
   5   1  -2    8.90    0.80
  -5   1   2    9.50    0.90
   5   1  -2    9.60    0.80
   4  -1  -2   29.80    1.20
   4  -1  -2   29.90    1.20
  -4  -1   2   30.20    1.30
  -4   1   2   28.20    1.30
   4   1  -2   30.70    1.20
   4   1  -2   32.20    1.20
   3  -1  -2   32.30    1.10
  -3  -1   2   32.50    1.20
  -3   1   2   33.00    1.30
   3   1  -2   32.70    1.20
  -2  -1   2  212.18    4.60
  -2   1   2  216.98    4.70
   2   1  -2  208.88    4.60
  -1  -1   2  465.95    9.60
  -1   1   2  462.05    9.60
   0   1   2   23.40    0.70
   0   1  -2   23.10    0.80
  -1  -1  -2    1.70    0.30
   1  -1   2    2.20    0.30
   1   1   2    2.20    0.30
  -1   1  -2    2.00    0.30
   2  -1   2   18.00    0.60
  -2  -1  -2   19.40    0.60
   2   1   2   19.00    0.70
  -2   1  -2   18.60    0.70
   3  -1   2  136.29    3.30
  -3  -1  -2  137.89    3.00
   3  -1   2  142.79    3.00
  -3   1  -2  135.19    3.10
   3   1   2  133.69    3.30
   3   1   2  133.29    3.10
  -4  -1  -2  509.15   10.30
   4  -1   2  488.55   10.30
   4  -1   2  488.15   10.60
   4   1   2  483.35   10.40
  -4   1  -2  504.75   10.40
   4   1   2  479.55   10.60
   5  -1   2    1.70    0.70
  -5  -1  -2    2.40    0.50
   5  -1   2    2.30    0.50
   5   1   2    2.00    0.70
   5   1   2    2.60    0.50
  -5   1  -2    2.20    0.60
   6  -1   2   13.50    0.90
   6  -1   2   11.10    1.10
   6   1   2   13.40    1.20
   6   1   2   14.20    0.90
  -6   1  -2   12.80    0.90
   7  -1   2    8.20    1.10
   7   1   2    7.40    1.20
   7   1   2    9.20    0.90
   8  -1   2   -0.60    1.00
   8   1   2   -0.80    0.90
   9  -1   2    4.40    1.20
   9   1   2    3.20    1.20
  10  -1   2    0.00    1.10
  10   1   2    0.20    1.30
  11  -1   2   10.00    1.80
  11   1   2    9.40    1.60
   9  -2  -2   15.60    1.60
  -8  -2   2   18.30    1.40
   8  -2  -2   18.50    1.60
  -8   2   2   15.10    1.40
   8   2  -2   17.60    1.30
   8   2  -2   18.30    1.40
   7  -2  -2   48.60    1.90
   7  -2  -2   53.79    2.10
  -7  -2   2   50.59    2.00
  -7   2   2   50.49    2.10
   7   2  -2   50.69    2.00
   7   2  -2   52.79    2.00
   6  -2  -2   14.20    1.10
  -6  -2   2   14.60    1.10
   6  -2  -2   12.90    0.90
   6   2  -2   11.80    1.00
  -6   2   2   12.90    1.10
   6   2  -2   12.60    1.00
   5  -2  -2   15.00    1.00
  -5  -2   2   15.30    1.10
   5  -2  -2   14.00    1.00
   5   2  -2   17.50    1.00
   5   2  -2   15.80    1.00
  -5   2   2   17.00    1.20
  -4  -2   2  124.89    3.10
   4  -2  -2  125.99    3.20
   4   2  -2  130.89    3.20
  -4   2   2  127.49    3.20
   4   2  -2  129.09    3.10
  -3  -2   2  294.77    6.50
   3   2  -2  304.27    6.40
  -3   2   2  296.07    6.50
   3   2  -2  304.67    6.50
  -2  -2   2  419.46    8.80
   2   2  -2  415.06    8.80
  -2   2   2  419.96    8.80
  -1   2   2   14.30    0.70
   1   2  -2   12.20    0.70
   0   2  -2    1.40    0.40
   0   2   2    1.30    0.30
  -1  -2  -2  324.77    6.70
   1   2   2  325.77    6.80
  -1   2  -2  326.67    6.80
   2  -2   2   82.39    2.10
  -2  -2  -2   80.79    1.80
   2  -2   2   82.79    1.80
   2   2   2   83.09    2.00
  -2   2  -2   82.99    1.90
   3  -2   2    6.80    0.50
   3  -2   2    4.50    0.60
  -3  -2  -2    6.10    0.40
   3   2   2    5.00    0.60
   3   2   2    5.30    0.50
  -3   2  -2    5.60    0.60
   4  -2   2   49.00    1.70
  -4  -2  -2   50.79    1.40
   4  -2   2   49.90    1.40
   4   2   2   47.90    1.70
  -4   2  -2   49.40    1.50
   4   2   2   51.19    1.50
  -5  -2  -2   -0.20    0.40
   5  -2   2    0.00    0.40
   5  -2   2   -0.10    0.60
  -5   2  -2    0.60    0.50
   5   2   2   -0.30    0.50
   5   2   2    0.40    0.70
   6  -2   2   -0.20    0.50
   6  -2   2    0.00    0.80
  -6   2  -2   -0.10    0.60
   6   2   2   -0.80    0.80
   6   2   2    1.00    0.60
   7  -2   2    2.90    1.00
   7   2   2    4.90    0.80
   7   2   2    6.60    1.00
   8  -2   2   10.30    1.30
   8   2   2   12.30    1.40
   9  -2   2    8.30    1.40
   9   2   2    5.70    1.30
  10  -2   2   -0.10    1.10
  10   2   2    0.80    1.20
  11  -2   2    3.00    1.40
  11   2   2    1.10    1.40
   9   3  -2    2.50    1.00
   8  -3  -2    9.20    1.30
  -8  -3   2    7.30    1.70
   8   3  -2    8.80    1.10
  -8   3   2    8.30    1.20
   8   3  -2    8.80    1.20
   7  -3  -2    1.10    0.90
  -7  -3   2    1.00    0.80
   7   3  -2   -0.50    0.70
   7   3  -2    1.90    0.80
  -7   3   2    1.00    0.90
  -6  -3   2   11.90    1.00
   6  -3  -2   11.00    1.00
   6   3  -2   11.80    1.00
  -6   3   2   14.10    1.20
   6   3  -2   13.30    1.00
   5  -3  -2    2.50    0.60
  -5  -3   2    2.60    0.60
   5   3  -2    1.80    0.60
  -5   3   2    0.20    0.70
   5   3  -2    2.00    0.60
  -4  -3   2  427.26    9.20
   4   3  -2  434.96    9.30
  -4   3   2  423.36    9.30
   4   3  -2  438.16    9.20
  -3  -3   2  107.29    2.60
   3   3  -2  104.99    2.60
   3   3  -2  108.99    2.50
  -3   3   2  105.79    2.70
  -2  -3   2  190.58    4.20
  -2   3   2  189.78    4.20
   2   3  -2  187.78    4.20
  -1   3   2   36.30    1.10
   1   3  -2   33.30    1.10
   1   3  -2   33.10    1.00
   0   3   2   48.30    1.20
   0   3  -2   50.39    1.30
   1  -3   2  409.26    8.50
   1   3   2  416.56    8.50
  -1   3  -2  401.76    8.50
   2  -3   2  192.18    4.30
   2  -3   2  195.98    4.10
  -2   3  -2  193.38    4.20
   2   3   2  194.48    4.20
  -3  -3  -2  370.46    7.70
   3  -3   2  374.06    8.10
   3  -3   2  382.76    7.80
   3   3   2  372.86    7.90
  -3   3  -2  367.56    7.90
   4  -3   2    2.90    0.70
  -4  -3  -2    2.30    0.40
   4  -3   2    2.90    0.40
   4   3   2    2.70    0.60
   4   3   2    3.20    0.60
  -4   3  -2    2.50    0.60
   5  -3   2    1.40    0.40
  -5  -3  -2    1.50    0.50
   5  -3   2    1.20    0.70
   5   3   2    0.90    0.60
   5   3   2    0.60    0.60
  -5   3  -2    1.20    0.60
   6  -3   2    2.50    0.80
   6   3   2    4.00    0.90
  -6   3  -2    5.10    0.80
   6   3   2    2.70    0.70
   7  -3   2   10.70    1.20
   7   3   2   11.50    1.20
   7   3   2   13.40    1.10
   8  -3   2    4.40    1.20
   8   3   2    5.20    1.10
   9  -3   2   -0.20    1.00
   9   3   2    0.60    1.10
  10  -3   2    2.70    1.30
  10   3   2    2.70    1.20
  11  -3   2   -1.10    1.40
  11   3   2    0.80    1.20
   9   4  -2   -1.60    0.90
  -9   4   2    0.80    1.10
   8  -4  -2    0.50    0.90
   8   4  -2    2.90    0.90
  -8   4   2    1.20    1.00
  -7  -4   2   -1.00    0.70
   7  -4  -2    1.50    0.90
  -7   4   2    0.60    0.90
   7   4  -2   -0.20    0.70
   7   4  -2    0.00    0.70
  -6  -4   2   57.29    2.00
   6  -4  -2   62.49    2.20
   6   4  -2   58.19    2.00
  -6   4   2   58.49    2.20
   6   4  -2   58.99    2.00
  -5  -4   2   -0.80    0.60
  -5   4   2    0.60    0.60
   5   4  -2    0.00    0.50
   5   4  -2    0.10    0.50
  -4  -4   2   -1.00    0.50
  -4   4   2    0.50    0.60
   4   4  -2   -0.40    0.50
   4   4  -2    0.90    0.50
  -3  -4   2  103.29    2.50
  -3   4   2  102.89    2.60
   3   4  -2  104.09    2.40
   3   4  -2  104.49    2.60
  -2  -4   2  187.58    4.10
  -2   4   2  181.08    4.10
   2   4  -2  183.08    4.10
   1   4  -2  185.58    4.00
  -1   4   2  185.48    4.00
   1   4  -2  184.68    4.10
   0  -4   2  107.89    2.40
   0   4  -2  109.79    2.50
   0   4   2  111.19    2.40
   1  -4   2   92.39    2.10
  -1   4  -2   90.29    2.10
   1   4   2   86.59    2.10
   2  -4   2   28.30    0.70
   2  -4   2   26.20    1.10
  -2   4  -2   27.60    1.00
   2   4   2   27.80    0.90
   3  -4   2    0.80    0.30
  -3  -4  -2    0.10    0.20
   3  -4   2    0.40    0.50
  -3   4  -2   -0.30    0.50
   3   4   2   -0.60    0.50
  -4  -4  -2   18.40    0.70
   4  -4   2   17.30    0.70
   4  -4   2   16.90    1.10
   4   4   2   17.80    1.00
  -4   4  -2   19.30    1.10
   4   4   2   18.40    1.10
   5  -4   2    9.30    1.00
  -5  -4  -2    9.90    0.60
   5  -4   2   10.20    0.70
  -5   4  -2   10.10    0.80
   5   4   2   10.10    0.80
   5   4   2    8.20    0.90
   6  -4   2   19.60    1.50
   6   4   2   17.30    1.30
   6   4   2   21.30    1.20
  -6   4  -2   19.30    1.30
   7  -4   2    2.10    0.90
   7   4   2    0.30    0.70
   7   4   2    1.50    0.90
   8  -4   2   10.30    1.40
   8   4   2    9.80    1.30
   9  -4   2   -0.20    1.20
   9   4   2    0.30    1.10
  10  -4   2    3.00    1.30
  10   4   2    1.50    1.30
  11  -4   2    8.90    2.60
  -9   5   2    0.50    1.10
   9   5  -2    1.20    1.00
  -8   5   2   -0.70    1.00
   8   5  -2    2.10    0.90
  -7  -5   2   23.40    1.50
  -7   5   2   25.30    1.70
   7   5  -2   21.30    1.50
   7   5  -2   26.30    1.50
  -6  -5   2   22.70    1.30
   6   5  -2   20.50    1.20
  -6   5   2   22.60    1.40
   6   5  -2   23.60    1.30
  -5  -5   2    1.60    0.60
   5   5  -2    0.10    0.60
   5   5  -2    1.40    0.50
  -5   5   2    0.20    0.70
  -4  -5   2    8.80    0.80
  -4   5   2    8.60    0.90
   4   5  -2    9.00    0.70
   4   5  -2    7.70    0.80
  -3  -5   2   16.10    0.90
   3   5  -2   14.70    0.90
  -3   5   2   16.50    1.00
   3   5  -2   17.60    0.70
   2   5  -2   45.40    1.30
   2   5  -2   47.30    1.40
  -2   5   2   46.60    1.40
   1   5  -2  725.53   14.80
  -1   5   2  696.03   14.80
   1   5  -2  724.43   14.80
   0  -5   2  319.47    6.60
   0   5  -2  316.07    6.70
   0   5  -2  315.67    6.60
   0   5   2  314.27    6.60
   0   5   2  316.47    6.60
   1  -5   2   69.99    1.70
  -1   5  -2   65.29    1.70
   1   5   2   66.79    1.70
   2  -5   2   46.90    1.00
   2  -5   2   43.20    1.40
  -2   5  -2   45.50    1.40
   2   5   2   45.70    1.30
   3  -5   2    4.10    0.60
   3  -5   2    6.70    0.40
  -3   5  -2    6.60    0.70
   3   5   2    4.70    0.60
  -4  -5  -2    9.10    0.50
   4  -5   2    9.20    0.50
   4  -5   2    7.00    0.80
  -4   5  -2   11.00    0.80
   4   5   2    8.30    0.80
   4   5   2   11.60    0.80
   5  -5   2    3.60    0.80
   5  -5   2    6.20    0.50
   5   5   2    6.80    0.80
   5   5   2    6.80    0.70
  -5   5  -2    5.30    0.80
   6  -5   2   50.89    2.10
   6   5   2   52.89    1.80
  -6   5  -2   51.99    1.90
   6   5   2   54.99    2.10
   7  -5   2    2.90    1.00
   7   5   2    3.40    1.00
  -7   5  -2    2.00    1.40
   7   5   2    2.30    0.80
   8  -5   2    0.70    1.10
   8   5   2    2.80    1.10
   8   5   2    3.30    0.90
   9  -5   2    5.10    1.40
   9   5   2    1.70    1.10
  10  -5   2    6.20    1.50
  10   5   2    7.60    1.50
  -9   6   2    2.50    1.30
   9   6  -2    4.80    1.20
   8   6  -2    6.20    1.10
  -8   6   2    6.20    1.20
  -7  -6   2   24.20    1.40
   7   6  -2   22.90    1.50
   7   6  -2   24.60    1.50
  -7   6   2   23.40    1.60
  -6  -6   2   41.30    1.60
   6   6  -2   39.80    1.60
  -6   6   2   40.60    1.90
   6   6  -2   42.00    1.60
  -5  -6   2  110.19    2.80
  -5   6   2  110.59    3.00
   5   6  -2  105.59    2.90
   5   6  -2  112.39    2.80
  -4  -6   2    7.90    0.80
  -4   6   2    8.00    0.90
   4   6  -2    8.50    0.60
   4   6  -2    9.40    0.90
  -3  -6   2    4.30    0.60
  -3   6   2    5.30    0.70
   3   6  -2    4.80    0.70
   3   6  -2    4.60    0.40
   2   6  -2   58.99    1.60
   2   6  -2   58.49    1.60
  -2   6   2   56.69    1.60
   1   6  -2  276.27    5.90
   1   6  -2  278.67    5.80
  -1   6   2  264.07    5.80
   0  -6   2    4.10    0.30
   0   6  -2    4.00    0.50
   0   6   2    3.50    0.40
   0   6  -2    4.30    0.40
   0   6   2    3.80    0.40
   1  -6   2   34.80    1.00
  -1   6  -2   31.20    1.10
   1   6   2   35.10    0.90
   1   6   2   35.80    1.10
   2  -6   2  110.69    2.70
   2   6   2  112.59    2.60
  -2   6  -2  105.79    2.60
   3  -6   2    3.30    0.60
   3  -6   2    4.00    0.30
   3   6   2    3.40    0.50
  -3   6  -2    3.20    0.60
  -4  -6  -2   52.99    1.30
   4  -6   2   55.29    1.30
   4  -6   2   54.79    1.80
  -4   6  -2   53.19    1.70
   4   6   2   54.29    1.70
   4   6   2   54.59    1.70
[truncated: 5,081,283 more chars]
